# Supplementary material for: The vinylogous Catellani reaction: a combined computational and experimental study
Source: PubMed Central journal article supplement (PMC5885779; doi:10.1039/c7sc04265e), 2017-11-30

## **The vinylogous Catellani reaction: A combined computational and experimental study**

Yoshihiko Yamamoto,\* Tsukasa Murayama, Jiyue Jiang, Takeshi Yasui and Masatoshi Shibuya

Department of Basic Medicinal Sciences, Graduate School of Pharmaceutical Sciences, Nagoya University, Chikusa, Nagoya 464-8601

yamamoto-yoshi@ps.nagoya-u.ac.jp

### **Supporting Information**

|                                                    |     |
|----------------------------------------------------|-----|
| 1. General Considerations                          | S2  |
| 2. Preparation of Benzylic Alcohol and Sulfonamide | S2  |
| 3. Preparation of 4-Iodo-2-quinolones              | S4  |
| 4. Vinylogous Catellani Reactions                  | S7  |
| 5. Control Experiments                             | S15 |
| 6. Single Crystal X-ray Diffraction Study          | S16 |
| 7. DFT Calculations                                | S18 |
| 8. NMR Charts                                      | S81 |

## 1. General considerations

Column chromatography was performed on silica gel (Cica silica gel 60N) with solvents specified below.  $^1\text{H}$  and  $^{13}\text{C}$  NMR spectra were obtained for samples in  $\text{CDCl}_3$  solutions at 25 °C.  $^1\text{H}$  NMR chemical shifts are reported in terms of chemical shift ( $\delta$ , ppm) relative to the singlet at 7.26 ppm for chloroform. Splitting patterns are designated as follows: s, singlet; d, doublet; t, triplet; q, quartet; quint, quintet; sext, sextet; sept, septet; m, multiplet. Coupling constants are reported in Hz.  $^{13}\text{C}$  NMR spectra were fully decoupled and are reported in terms of chemical shift ( $\delta$ , ppm) relative to the triplet at  $\delta$  77.0 ppm for  $\text{CDCl}_3$ . Reagents and dry solvents were purchased and used as received. *N*-protected (*o*-aminophenyl)propiolates were reported in our previous paper.<sup>1</sup> Benzylic alcohols **3a**,<sup>2</sup> **3b**,<sup>3</sup> **3c**,<sup>3</sup> **3e**,<sup>4</sup> **3g**,<sup>2</sup> **3h**,<sup>2</sup> **3i**,<sup>2</sup> **3j**,<sup>5</sup> **3k**,<sup>6</sup> **3l**,<sup>6</sup> **3p**,<sup>7</sup> **3r**,<sup>8</sup> **3s**,<sup>9</sup> and benzylic amines **7**,<sup>10</sup> were synthesized according to literature

## 2. Preparation of benzylic alcohols and sulfonamide

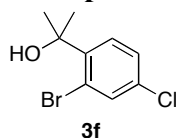

**Synthesis of benzylic alcohol 3f:** To a solution of methyl 2-bromo-4-chlorobenzoate (461.9 mg, 1.85 mmol) in  $\text{Et}_2\text{O}$  (10.0 mL) was added  $\text{MeMgI}$  (3.0 M in  $\text{Et}_2\text{O}$ , 2.0 mL, 6.0 mmol) at 0 °C. The reaction mixture was stirred for 12 h at room temperature. The reaction was quenched with sat.  $\text{NH}_4\text{Cl}$  (10 mL) at 0 °C and the whole mixture was extracted with  $\text{AcOEt}$  ( $3 \times 20$  mL). The combined organic layer was washed with brine (10 mL) and dried over  $\text{Mg}_2\text{SO}_4$ . After concentration in vacuo, the crude material was purified by flash column chromatography on silica gel (hexane/ $\text{EtOAc}$  = 20:1) to afford **3f** (308.3 mg, 86%) as a colorless oil;  $^1\text{H}$  NMR (400 MHz,  $\text{CDCl}_3$ , 25 °C)  $\delta$  7.64 (d,  $J$  = 8.8 Hz, 1 H), 7.59 (d,  $J$  = 1.6 Hz, 1 H), 7.27 (dd,  $J$  = 8.8, 1.6 Hz, 1 H), 2.51 (s, 1 H), 1.73, (s, 6 H);  $^{13}\text{C}$  NMR (100 MHz,  $\text{CDCl}_3$ , 25 °C)  $\delta$  144.8, 134.3, 133.1, 128.1, 127.4, 120.5, 73.3, 29.3; IR (neat) 3410 (O–H)  $\text{cm}^{-1}$ ; HRMS (DART)  $m/z$  calcd for  $\text{C}_9\text{H}_9\text{BrCl}$  230.9576, found 230.9573 [ $\text{M}-\text{OH}$ ]<sup>+</sup>.

<sup>1</sup> T. Murayama, M. Shibuya, Y. Yamamoto, *Adv. Synth. Catal.* **2016**, 358, 166-171.

<sup>2</sup> L. Mahendar, J. Krishna, A. G. K. Reddy, B. V. Ramulu, G. Satyanarayana, *Org. Lett.* **2012**, 14, 628-631.

<sup>3</sup> A. Tsutomu, B. T. William, D. J. Marie, P. Jacob J.; W. William Hunter, W. J. Raymond; Z. Yong-Kang, Z. Yasheen, Anacor Pharmaceuticals, Inc., USA; Eli Lilly and Company, US Patent 20130131017 A1

<sup>4</sup> G. Tomasz, H. Robert, H. Scott, E. Brian, R. Olga, Rempex Pharmaceuticals, Inc., USA, WO 2012109164 A1

<sup>5</sup> H. Kinoshita, K. Yaguchi, T. Tphjima, N. Hirai, K. Miura, *Tetrahedron Lett.* **2016**, 57, 2039-2043.

<sup>6</sup> L. Mahendar, G. Satyanarayana, *J. Org. Chem.* **2014**, 79, 2059-2074.

<sup>7</sup> B. Schulte, R. Fröhlich, A. Studer, *Tetrahedron* **2008**, 64, 11852-11859.

<sup>8</sup> A. Raskosova, R. Stößer, W. Abraham, *Chem. Commun.* **2013**, 49, 3964-3966.

<sup>9</sup> A. I. Subota, O. O. Grygorenko, Y. B. Valter, M. A. Tairov, O. S. Artamonov, D. M. Volochnyuk, S. V. Ryabukhin, *Synlett* **2015**, 26, 408-411.

<sup>10</sup> I. Erdelmeier, C. Tailhan-Lomont, J.-C. Yadan, *J. Org. Chem.* **2000**, 65, 8152-8157.

Similarly, benzylic alcohol **3d** was prepared from the corresponding ester.

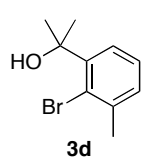

**Analytical data for 3d:** 554 mg, 55%; white solid (m.p. 60.1–61.9 °C);  $^1\text{H}$  NMR (400 MHz,  $\text{CDCl}_3$ , 25 °C)  $\delta$  7.48 (dd,  $J = 7.3, 2.3$  Hz, 1 H), 7.22–7.13 (m, 2 H), 3.08 (br s, 1 H), 2.45 (s, 3 H), 1.78 (s, 6 H);  $^{13}\text{C}$  NMR (100 MHz,  $\text{CDCl}_3$ , 25 °C)  $\delta$  146.2, 139.8, 129.8, 127.0, 124.9, 123.5, 74.0, 29.7, 24.7; IR (neat) 3423 (O–H)  $\text{cm}^{-1}$ ; HRMS (DART)  $m/z$  calcd for  $\text{C}_{10}\text{H}_{12}\text{Br}$  211.0122, found 211.0129  $[\text{M} - \text{OH}]^+$ .

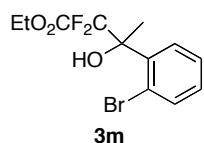

**Synthesis of benzylic alcohol 3m:** To a suspension of Zn (653.9 mg, 10.0 mmol) in THF (1 mL) was added dibromoethane (32  $\mu\text{L}$ ), and this mixture was heated at 65 °C for 1 min. After cooled to room temperature,  $\text{Me}_3\text{SiCl}$  (40  $\mu\text{L}$ ) was added. After stirring for 15 min, a solution of o-bromoacetophenone (266.5  $\mu\text{L}$ , 2.0 mmol) and ethyl bromodifluoroacetate (512.9  $\mu\text{L}$ , 4.0 mmol) in THF (3 mL) was added and the resultant mixture was stirred at room temperature for 3 h. The reaction was quenched with sat.  $\text{NH}_4\text{Cl}$  (10 mL) and the whole mixture was extracted with  $\text{Et}_2\text{O}$  ( $3 \times 10$  mL). The combined organic layer was washed with brine (10 mL) and dried over  $\text{Mg}_2\text{SO}_4$ . After concentration in vacuo, the crude material was purified by flash column chromatography on silica gel (hexane/ $\text{EtOAc} = 8:1$ ) to afford **3m** (485.5 mg, 75%) as a colorless oil;  $^1\text{H}$  NMR (400 MHz,  $\text{CDCl}_3$ , 25 °C)  $\delta$  7.63 (d,  $J = 8.0$  Hz, 1 H), 7.57 (d,  $J = 7.6$  Hz, 1 H), 7.32 (dt,  $J = 7.6, 0.8$  Hz, 1 H), 7.18 (dt,  $J = 7.6, 1.2$  Hz, 1 H), 4.28 (q,  $J = 7.2$  Hz, 2 H), 4.14 (s, 1 H), 1.93 (s, 3 H), 1.27 (t,  $J = 7.2$  Hz, 3 H);  $^{13}\text{C}$  NMR (100 MHz,  $\text{CDCl}_3$ , 25 °C)  $\delta$  163.2 (t,  $J = 31.5$  Hz), 137.2, 135.7, 130.3, 129.8, 127.2, 120.8, 115.5 (t,  $J = 261.3$  Hz), 77.8 (t,  $J = 25.3$  Hz), 63.1, 23.7, 13.7;  $^{19}\text{F}$  NMR (376 MHz,  $\text{CDCl}_3$ , 25 °C):  $\delta$  -112.7 (d,  $J = 254.2$  Hz), -114.1 (d,  $J = 254.2$  Hz); IR (neat) 3521 (O–H), 1761 (C=O)  $\text{cm}^{-1}$ ; HRMS (DART)  $m/z$  calcd for  $\text{C}_{12}\text{H}_{13}\text{BrF}_2\text{O}_3 \cdot \text{NH}_4$  340.0356, found 340.0357  $[\text{M} + \text{NH}_4]^+$ .

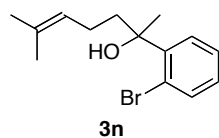

**Synthesis of benzylic alcohol 3n:** The reported procedure for the synthesis of **3j**<sup>5</sup> was applied to 6-methyl-5-hepten-2-one (1.2 mL, 10.0 mmol). The crude material was purified by flash column chromatography on silica gel (hexane/ $\text{EtOAc} = 100:1 \sim 40:1$ ) to afford **3n** (200.6 mg, 7%) as a yellow oil;  $^1\text{H}$  NMR (400 MHz,  $\text{CDCl}_3$ , 25 °C)  $\delta$  7.72 (dd,  $J = 8.0, 1.6$  Hz, 1 H), 7.58 (dd,  $J = 8.0, 1.2$  Hz, 1 H), 7.30 (dt,  $J = 7.6, 1.2$  Hz, 1 H), 7.09 (dt,  $J = 7.6, 1.6$  Hz, 1 H), 5.10 (t,  $J = 7.0$  Hz, 1 H), 2.54 (s, 1 H), 2.52–2.45 (m, 1 H), 1.97–1.80 (m, 3 H), 1.70 (s, 3 H), 1.65 (s, 3 H), 1.47 (s, 3 H);  $^{13}\text{C}$  NMR (100 MHz,  $\text{CDCl}_3$ , 25 °C)  $\delta$  145.3, 134.9, 132.4, 128.4, 128.3, 127.4, 124.0, 120.1, 76.2, 40.4, 28.0, 25.7, 23.1, 17.6; IR (neat) 3458 (O–H)  $\text{cm}^{-1}$ ; HRMS (DART)  $m/z$  calcd for  $\text{C}_{14}\text{H}_{19}\text{BrO} \cdot \text{NH}_4$  300.0963, found 300.0943  $[\text{M} + \text{NH}_4]^+$ .

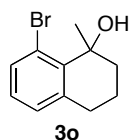

**Synthesis of benzylic alcohol 3o:** To a solution of 8-bromo-3,4-dihydronaphthalen-1(2H)-one<sup>11</sup> (596.1 mg, 2.64 mmol) in Et<sub>2</sub>O (5 mL) was added MeMgI (3.0 M in Et<sub>2</sub>O, 1.1 mL, 3.17 mmol) at 0 °C. The reaction mixture was stirred for 1.5 h at room temperature. The reaction was quenched with sat. NH<sub>4</sub>Cl (10 mL) at 0 °C and the whole mixture was extracted with Et<sub>2</sub>O (3 × 10 mL). The combined organic layer was washed with brine (10 mL) and dried over Mg<sub>2</sub>SO<sub>4</sub>. After concentration in vacuo, the crude material was purified by flash column chromatography on silica gel (hexane/EtOAc = 8:1) to afford **3o** (355.5 mg, 56%) as a colorless solid (m.p. 68.0–70.5 °C); <sup>1</sup>H NMR (400 MHz, CDCl<sub>3</sub>, 25 °C) δ 7.41 (d, *J* = 7.6 Hz, 1 H), 7.06 (d, *J* = 7.6 Hz, 1 H), 6.97 (t, *J* = 7.6 Hz, 1 H), 3.70 (s, 1 H), 2.89 (ddd, *J* = 16.0, 10.8, 5.6 Hz, 1 H), 2.81 (dt, *J* = 16.0, 4.4 Hz, 1 H), 2.02–1.97 (m, 2 H), 1.94–1.86 (m, 1 H), 1.82–1.71 (m, 1 H), 1.76 (s, 3 H); <sup>13</sup>C NMR (100 MHz, CDCl<sub>3</sub>, 25 °C) δ 140.0, 139.6, 132.7, 128.9, 127.7, 121.7, 72.3, 40.3, 31.4, 28.4, 20.0; IR (neat) 3425 (O–H) cm<sup>-1</sup>; HRMS (DART) *m/z* calcd for C<sub>11</sub>H<sub>13</sub>BrO•NH<sub>4</sub> 258.0494, found 258.0516 [M+NH<sub>4</sub>]<sup>+</sup>.

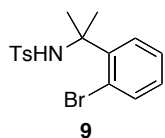

**Synthesis of sulfonamide 9:** To a solution of *o*-bromobenzylamine **7**<sup>10</sup> (214.6 mg, 1.0 mmol) in CH<sub>2</sub>Cl<sub>2</sub> (3.0 mL) was added triethylamine (140 μL, 0.95 mmol) and *p*-toluenesulfonyl chloride (180.3 mg, 1.0 mmol) at 0 °C. The reaction mixture was stirred at room temperature for 2 days. The reaction was quenched with 10% HCl (10 mL) and the whole mixture was extracted with CH<sub>2</sub>Cl<sub>2</sub> (2 × 20 mL). The combined organic layer was washed with brine (10 mL) and dried over Na<sub>2</sub>SO<sub>4</sub>. After concentration in vacuo, the crude material was purified by flash column chromatography on silica gel (hexane/EtOAc = 4:1) to afford tosylamide **9** (219.6 mg, 60%) as a brown solid (m.p. 96.8–98.9 °C); <sup>1</sup>H NMR (400 MHz, CDCl<sub>3</sub>, 25 °C) δ 7.44 (d, *J* = 8.4 Hz, 2 H), 7.30 (dd, *J* = 8.0, 1.6 Hz, 1 H), 7.25 (dd, *J* = 8.4, 1.2 Hz, 1 H), 7.15 (dt, *J* = 7.6, 1.6 Hz, 1 H), 6.97 (d, *J* = 8.8 Hz, 2 H), 6.96 (dt, *J* = 7.6, 1.6 Hz, 1 H), 5.89 (s, 1 H), 2.30 (s, 3 H), 1.81 (s, 6 H); <sup>13</sup>C NMR (100 MHz, CDCl<sub>3</sub>, 25 °C) δ 142.5, 141.1, 137.7, 135.4, 128.7, 128.5, 128.2, 127.3, 127.2, 121.7, 58.5, 29.2, 21.3; IR (neat) 3292 (N–H) cm<sup>-1</sup>; HRMS (ESI) *m/z* calcd for C<sub>16</sub>H<sub>18</sub>BrNO<sub>2</sub>S•Na 390.0139, found 390.0141 [M+Na]<sup>+</sup>.

### 3. Synthesis of 4-iodo-2-quinolones

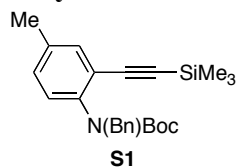

**Synthesis of silylalkyne S1:** In a sealed tube, a solution of 2-iodo-4-methylaniline (2.33 g, 10.0 mmol) in di-*t*-butyl dicarbonate (3.68 mL, 16.0 mmol) was heated at 90 °C for 2 days. To a solution of the crude product in DMF (50 mL) was added sodium hydride (60% oil, 0.80 g, 20.0 mmol) at 0 °C. The reaction mixture was stirred at room temperature for 1 h. To the

<sup>11</sup> A. Y. Lebedev, A. S. Khartulyari, A. Z. Voskoboynikov, *J. Org. Chem.* **2005**, *70*, 596-602.

resultant mixture was added benzyl bromide (1.43 mL, 12.0 mmol). The reaction mixture was stirred at room temperature for 1 h. The reaction was quenched with sat. NH<sub>4</sub>Cl (20 mL), and the mixture was extracted with AcOEt (3 × 20 mL). The combined organic layer was washed with water (2 × 20 mL), brine (20 mL), and dried over MgSO<sub>4</sub>. After concentration in vacuo, the crude product was purified by flash column chromatography on silica gel (hexane/EtOAc = 50:1~20:1) to afford *tert*-butyl benzyl(2-iodo-4-methylphenyl)carbamate-*N*-protected *o*-iodoaniline as a yellow oil.

To a solution of the crude product obtained above (2.01 g, 4.75 mmol) in *t*-butyl methyl ether (20 mL) and diisopropylamine (4 mL) was added PdCl<sub>2</sub>(PPh<sub>3</sub>)<sub>2</sub> (33.3 mg, 0.0475 mmol) and CuI (18.1 mg, 0.095 mmol) at room temperature. The reaction mixture was degassed at –78 °C and to this mixture was added trimethylsilylacetylene (0.724 mL, 5.23 mmol). The reaction mixture was stirred at 50 °C for 5 h. Insoluble materials were filtered with a pad of Celite® and the filtrate was concentrated in vacuo. The obtained crude material was purified by flash column chromatography on silica gel (hexane/EtOAc = 20:1~15:1) to afford silylalkyne **S2** (898 mg, 23% over 3 steps) as a yellow oil; a mixture of two rotamers; <sup>1</sup>H NMR (CDCl<sub>3</sub>, 400 MHz, 25 °C) δ 7.31–7.19 (major+minor) (br m, 6 H), 7.03–6.89 (minor) (br m, 2 H), 6.89 (major) (d, *J* = 8.0 H, 1 H), 6.70 (major) (d, *J* = 8.0 H, 1 H), 5.20–4.34 (major+minor) (br m, 2 H), 2.27 (s, 3 H), 1.49 (minor)/1.36 (major) (br s, 9 H), 0.25 (major+minor) (br s, 9 H); <sup>13</sup>C NMR (CDCl<sub>3</sub>, 100 MHz, 25 °C) δ 154.5 (major)/154.2 (minor), 141.8 (minor)/141.4 (major), 138.3 (minor)/137.8 (major), 136.2 (minor)/135.9 (major), 133.5 (minor)/132.9 (major), 129.6 (minor)/129.3 (major), 128.8 (minor)/128.4 (major), 127.8 (major)/127.6 (minor), 126.8 (major/minor), 121.8 (major/minor), 102.0 (major/minor), 97.8 (major+minor), 79.9 (minor)/79.2 (major), 53.7 (minor)/52.6 (major), 28.1 (minor)/27.9 (major), 20.4 (major+minor), –0.4 (major+minor); IR (neat) 2154 (C≡C), 1703 (C=O), 1250 (Si–CH<sub>3</sub>), 848 (Si–CH<sub>3</sub>) cm<sup>–1</sup>; HRMS (ESI) *m/z* calcd for C<sub>24</sub>H<sub>31</sub>NO<sub>2</sub>Si•Na 416.2022, found 416.2012 [M+Na]<sup>+</sup>.

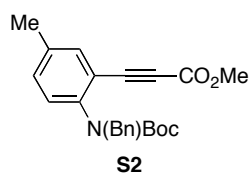

**Synthesis of propiolate S2:** In a flask, CsF (693 g, 4.56 mmol) was heated under vacuum at 120 °C for 1 h. The flask was filled with CO<sub>2</sub> gas (balloon) and then with dry DMF (1 mL). To the resultant suspension was added drop-wise a solution of silylalkyne **S1** (898 mg, 2.28 mmol) in dry DMF (6 mL) at room temperature. The reaction mixture was stirred at room temperature for 2 h. After addition of methyl iodide (170 μL, 2.74 mmol), the stirring was continued at room temperature for another 1.5 h. The reaction was quenched with sat. NH<sub>4</sub>Cl (10 mL) and the whole mixture was extracted with AcOEt (3 × 10 mL). The combined organic layer was washed with water (2 × 10 mL), brine (10 mL), and dried over MgSO<sub>4</sub>. After concentration in vacuo, the crude material was purified by flash column chromatography on silica gel (hexane/EtOAc = 30:1~15:1) to afford propiolate **S2** (641 mg,

85%) as a yellow oil: a mixture of two rotamers;  $^1\text{H}$  NMR (400 MHz,  $\text{CDCl}_3$ , 25 °C)  $\delta$  7.45–6.81 (major+minor) (br m, 8 H), 5.10–4.30 (major+minor) (br s, 2 H), 3.82 (major+minor) (s, 3 H), 2.29 (major+minor) (s, 3 H), 1.50 (minor)/1.37 (major) (br s, 9 H);  $^{13}\text{C}$  NMR ( $\text{CDCl}_3$ , 100 MHz, 25 °C)  $\delta$  154.2 (major+minor), 153.9 (major+minor), 143.0 (minor)/142.1 (major), 137.7 (minor)/137.3 (major), 136.4, (major+minor), 134.4 (minor)/134.0 (major), 132.0 (minor)/131.7 (major), 128.4 (major+minor), 128.1 (major+minor), 127.9 (major+minor), 127.7 (minor)/127.0 (major) 118.9 (major or minor), 83.6 (major)/83.2 (minor), 80.7 (minor)/80.1 (major), 54.1 (minor)/53.0 (major), 52.3 (major+minor), 27.8 (major+minor) 20.4 (major+minor); IR (neat) 2218 ( $\text{C}\equiv\text{C}$ ), 1712 ( $\text{C}=\text{O}$ )  $\text{cm}^{-1}$ ; HRMS (ESI)  $m/z$  calcd for  $\text{C}_{23}\text{H}_{25}\text{NO}_4\cdot\text{Na}$  402.1681, found 402.1672  $[\text{M}+\text{Na}]^+$ .

### Representative procedure for preparation of 4-iodo-2-quinolones **2a** –Synthesis of **2a**:

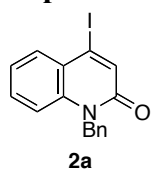

To a solution of methyl 3-(2-(benzyl(*tert*-butoxycarbonyl)amino)phenyl)propiolate (365.2 mg, 1.0 mmol) in acetic acid (2 mL) was added sodium iodide (890.0 mg, 6.0 mmol) at room temperature. The reaction mixture was stirred at 110 °C for 1 h. The reaction was quenched with  $\text{H}_2\text{O}$  (10 mL) and the resultant mixture was extracted with EtOAc (3  $\times$  10 mL). The combined organic layer was washed with sat.  $\text{Na}_2\text{CO}_3$  (10 mL), sat.  $\text{Na}_2\text{S}_2\text{O}_3$  (10 mL), and brine (10 mL). After dried over  $\text{MgSO}_4$ , the solvents were removed in vacuo. The obtained crude material was purified by flash column chromatography on silica gel (hexane/EtOAc = 7:1) to afford 4-iodo-2-quinolone **2a** (340.0 mg, 94%) as a white solid (m.p. 123.6–125.4 °C):  $^1\text{H}$  NMR (400 MHz,  $\text{CDCl}_3$ , 25 °C)  $\delta$  7.85 (dd,  $J$  = 8.4, 1.6 Hz, 1 H), 7.61 (s, 1 H), 7.45 (ddd,  $J$  = 8.4, 7.2, 1.6 Hz, 1 H) 7.33–7.18 (m, 7 H), 5.54 (s, 2 H);  $^{13}\text{C}$  NMR (100 MHz,  $\text{CDCl}_3$ , 25 °C)  $\delta$  160.6, 137.8, 135.8, 133.9, 133.1, 131.7, 128.9, 127.4, 126.5, 123.1, 122.2, 115.31, 115.25, 46.3; IR (neat) 1645 ( $\text{C}=\text{O}$ )  $\text{cm}^{-1}$ ; HRMS (ESI)  $m/z$  calcd for  $\text{C}_{16}\text{H}_{12}\text{INO}\cdot\text{Na}$  383.9861, found 383.9851  $[\text{M}+\text{Na}]^+$ .

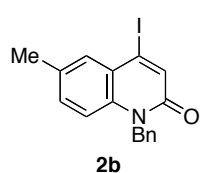

**Analytical data for 2b:** 306.7 g, 84%; yellow solid (m.p. 178.7–182.1 °C);  $^1\text{H}$  NMR (400 MHz,  $\text{CDCl}_3$ , 25 °C)  $\delta$  7.62 (s, 1 H), 7.58 (s, 1 H), 7.32–7.21 (m, 5 H), 7.19 (d,  $J$  = 6.8 Hz, 1 H), 7.10 (d,  $J$  = 8.8 Hz, 1 H), 5.52 (s, 2 H), 2.42 (s, 3 H);  $^{13}\text{C}$  NMR (100 MHz,  $\text{CDCl}_3$ , 25 °C)  $\delta$  160.4, 135.9, 135.7, 133.5, 132.9, 132.8, 132.7, 128.7, 127.3, 126.4, 122.0, 115.14, 115.09, 46.1, 20.6; IR (neat) 1643 ( $\text{C}=\text{O}$ )  $\text{cm}^{-1}$ ; HRMS (ESI)  $m/z$  calcd for  $\text{C}_{17}\text{H}_{14}\text{INO}\cdot\text{Na}$  398.0018, found 398.0013  $[\text{M}+\text{Na}]^+$ .

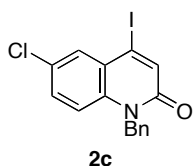

**Analytical data for 2c:** 365.6 mg, 90%; white solid (m.p. 168.3–169.1 °C);  $^1\text{H}$  NMR (400 MHz,  $\text{CDCl}_3$ , 25 °C)  $\delta$  7.85 (d,  $J = 2.4$  Hz, 1 H), 7.62 (s, 1 H), 7.37 (dd,  $J = 8.8$  2.4 Hz, 1 H) 7.34–7.20 (m, 6 H), 5.51 (br s, 2 H);  $^{13}\text{C}$  NMR (100 MHz,  $\text{CDCl}_3$ , 25 °C)  $\delta$  160.2, 136.4 135.4, 134.3, 133.1, 131.7, 129.0, 128.8, 127.6, 126.4, 123.5, 116.9, 113.3, 46.4; IR (neat) 1647 (C=O)  $\text{cm}^{-1}$ ; HRMS (ESI)  $m/z$  calcd for  $\text{C}_{16}\text{H}_{11}\text{ClINO}\cdot\text{Na}$  417.9472, found 417.9477  $[\text{M}+\text{Na}]^+$ .

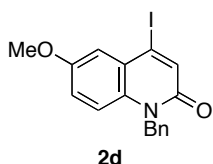

**Analytical data for 2d:** 369.7 mg, 95%; white solid (m.p. 151.5–153.2 °C);  $^1\text{H}$  NMR (400 MHz,  $\text{CDCl}_3$ , 25 °C)  $\delta$  7.61 (s, 1 H), 7.35–7.13 (m, 7 H), 7.04 (dd,  $J = 9.2$ , 2.8 Hz, 1 H), 5.52 (br s, 2 H), 3.87 (s, 3 H);  $^{13}\text{C}$  NMR (100 MHz,  $\text{CDCl}_3$ , 25 °C)  $\delta$  160.2, 155.3, 135.9, 133.6, 132.2, 128.8, 127.4, 126.4, 123.1, 120.1, 116.8, 116.1, 114.6, 55.7, 46.3; IR (neat) 1639 (C=O)  $\text{cm}^{-1}$ ; HRMS (ESI)  $m/z$  calcd for  $\text{C}_{17}\text{H}_{14}\text{INO}_2\cdot\text{Na}$  413.9967, found 413.9960  $[\text{M}+\text{Na}]^+$ .

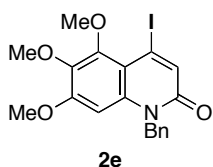

**Analytical data for 2e:** 391.7 mg, 87%; white solid (m.p. 137.6–138.0 °C);  $^1\text{H}$  NMR (400 MHz,  $\text{CDCl}_3$ , 25 °C)  $\delta$  7.59 (s, 1 H) 7.33–7.18 (m, 5 H), 6.47 (s, 1 H), 5.50 (br s, 2 H), 3.95 (s, 3 H), 3.81 (s, 3 H), 3.70 (s, 3 H);  $^{13}\text{C}$  NMR (100 MHz,  $\text{CDCl}_3$ , 25 °C)  $\delta$  160.6, 155.8, 150.3, 138.1, 136.1, 136.0, 133.2, 129.0, 127.5, 126.6, 109.2, 101.0, 94.2, 61.5, 60.9, 55.7, 47.0; IR (neat) 1643 (C=O)  $\text{cm}^{-1}$ ; HRMS (ESI)  $m/z$  calcd for  $\text{C}_{19}\text{H}_{18}\text{INO}_4\cdot\text{Na}$  474.0178, found 474.0180  $[\text{M}+\text{Na}]^+$ .

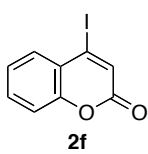

**Analytical data for 2f:** 145.2 mg, 89%; pale-yellow solid (m.p. 103.3–104.3 °C);  $^1\text{H}$  NMR (400 MHz,  $\text{CDCl}_3$ , 25 °C)  $\delta$  7.70 (dd,  $J = 8.4$ , 1.2 Hz, 1 H) 7.57 (ddd,  $J = 8.4$ , 7.2, 1.2 Hz, 1 H), 7.34 (ddd,  $J = 8.4$ , 7.2, 1.2 Hz, 1 H), 7.27 (dd,  $J = 8.4$ , 1.2 Hz, 1 H), 7.22 (s, 1 H);  $^{13}\text{C}$  NMR (100 MHz,  $\text{CDCl}_3$ , 25 °C)  $\delta$  158.1, 151.3, 132.9, 132.4, 127.4, 125.1, 120.6, 120.1, 116.9; IR (neat) 1711 (C=O)  $\text{cm}^{-1}$ ; HRMS (ESI)  $m/z$  calcd for  $\text{C}_9\text{H}_5\text{IO}_2\cdot\text{Na}$  294.9232, found 294.9218  $[\text{M}+\text{Na}]^+$ .

#### 4. Vinylogous Catellani reactions

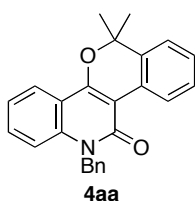

**Representative procedure (1) – Synthesis of 4aa:** A solution of 4-iodo-2-quinolone **2a** (72.4 mg, 0.20 mmol), 2-(2-bromophenyl)propan-2-ol **3a** (43.2 mg, 0.20 mmol),  $\text{Pd}(\text{OAc})_2$  (2.26 mg, 0.01 mmol), norbornene (18.6 mg, 0.20 mmol), and  $\text{K}_2\text{CO}_3$  (69.3 mg, 0.50 mmol) in dry DMF (4.0 mL) was degassed at  $-78$  °C. The reaction mixture was heated at 105 °C for 2 h. The reaction was quenched with  $\text{H}_2\text{O}$  (10 mL) and the whole mixture was extracted with AcOEt (3  $\times$  20 mL). The combined organic layer was washed with water (2  $\times$  10 mL), brine (10 mL) and dried over  $\text{MgSO}_4$ . After concentration in

vacuo, the crude material was purified by flash column chromatography on silica gel (hexane/EtOAc = 20:1) to afford **4aa** (63.7 mg, 87%) as a white solid (m.p. 154.2–157.9 °C):  $^1\text{H NMR}$  (400 MHz,  $\text{CDCl}_3$ , 25 °C)  $\delta$  9.01 (dd,  $J = 8.0, 1.2$  Hz, 1 H), 8.10 (dd,  $J = 8.0, 1.2$  Hz, 1 H), 7.45 (ddd,  $J = 8.8, 6.8, 1.6$  Hz, 1 H), 7.38 (dt,  $J = 6.8, 1.2$  Hz, 1 H), 7.35–7.18 (m, 9 H), 5.64 (br s, 2 H), 1.78 (s, 6 H);  $^{13}\text{C NMR}$  (100 MHz,  $\text{CDCl}_3$ , 25 °C)  $\delta$  161.5, 156.2, 138.8, 137.0, 136.9, 131.2, 128.8, 127.9, 127.8, 127.1, 126.9, 126.6, 125.8, 123.7, 122.1, 121.8, 116.5, 114.7, 106.5, 80.0, 45.9, 27.5; IR (neat) 1634 (C=O)  $\text{cm}^{-1}$ ; HRMS (ESI)  $m/z$  calcd for  $\text{C}_{25}\text{H}_{21}\text{NO}_2 \cdot \text{Na}$  390.1470, found 390.1461  $[\text{M}+\text{Na}]^+$ .

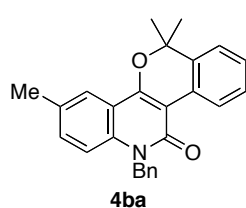

**Analytical data for 4ba:** 61.7 mg, 81%; yellow solid (m.p. 177.1–179.5 °C);  $^1\text{H NMR}$  (400 MHz,  $\text{CDCl}_3$ , 25 °C)  $\delta$  9.00 (dd,  $J = 8.0, 1.2$  Hz, 1 H), 7.86 (s, 1 H), 7.37 (dt,  $J = 7.6, 1.2$  Hz, 1 H), 7.33–7.19 (m, 8 H), 7.14 (d,  $J = 8.4$  Hz, 1 H), 5.61 (br s, 2 H), 2.40 (s, 3 H), 1.77 (s, 6 H);  $^{13}\text{C NMR}$  (100 MHz,  $\text{CDCl}_3$ , 25 °C)  $\delta$  161.3, 156.0, 137.0, 136.9, 132.5, 131.4, 128.7, 127.80, 127.78, 127.0, 126.5, 125.8, 123.2, 122.1, 116.4, 114.6, 106.5, 79.9, 45.8, 27.4, 20.7; IR (neat) 1631 (C=O)  $\text{cm}^{-1}$ ; HRMS (ESI)  $m/z$  calcd for  $\text{C}_{26}\text{H}_{23}\text{NO}_2 \cdot \text{Na}$  404.1627, found 404.1620  $[\text{M}+\text{Na}]^+$ .

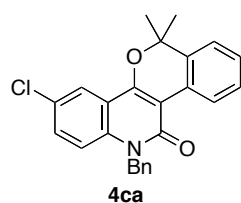

**Analytical data for 4ca:** 64.9 mg, 81%; white solid (m.p. 175.8–179.4 °C);  $^1\text{H NMR}$  (400 MHz,  $\text{CDCl}_3$ , 25 °C)  $\delta$  8.99 (d,  $J = 7.6$  Hz, 1 H), 8.04 (d,  $J = 2.4$  Hz, 1 H), 7.42–7.22 (m, 9 H), 7.18 (d,  $J = 8.8$  Hz, 1 H), 5.60 (br s, 2 H), 1.78 (s, 6 H);  $^{13}\text{C NMR}$  (100 MHz,  $\text{CDCl}_3$ , 25 °C)  $\delta$  161.1, 155.0, 137.2, 137.1, 136.5, 131.1, 128.8, 128.3, 127.9, 127.6, 127.3, 126.5, 125.9, 123.0, 122.2, 117.6, 116.2, 107.3, 80.4, 46.0, 27.5; IR (neat) 1637 (C=O)  $\text{cm}^{-1}$ ; HRMS (ESI)  $m/z$  calcd for  $\text{C}_{25}\text{H}_{20}\text{ClNO}_2 \cdot \text{Na}$  424.1080, found 424.1085  $[\text{M}+\text{Na}]^+$ .

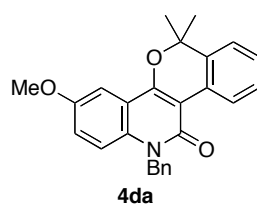

**Analytical data for 4da:** 72.6 mg, 90%; white solid (m.p. 199.2–201.2 °C);  $^1\text{H NMR}$  (400 MHz,  $\text{CDCl}_3$ , 25 °C)  $\delta$  9.02 (dd,  $J = 8.0, 1.2$  Hz, 1 H), 7.50 (d,  $J = 2.4$  Hz, 1 H), 7.37 (dt,  $J = 7.6, 1.6$  Hz, 1 H), 7.34–7.20 (m, 7 H), 7.18 (d,  $J = 9.6$  Hz, 1 H), 7.06 (dd,  $J = 9.2, 2.8$  Hz, 1 H), 5.61 (br s, 2 H), 3.87 (s, 3 H), 1.77 (s, 6 H);  $^{13}\text{C NMR}$  (100 MHz,  $\text{CDCl}_3$ , 25 °C)  $\delta$  161.0, 155.6, 154.6, 137.04, 136.98, 133.5, 128.7, 127.9, 127.8, 127.09, 126.97, 126.5, 125.9, 122.1, 119.9, 117.2, 116.1, 106.9, 105.4, 80.0, 55.7, 45.9, 27.5; IR (neat) 1631 (C=O)  $\text{cm}^{-1}$ ; HRMS (ESI)  $m/z$  calcd for  $\text{C}_{26}\text{H}_{23}\text{NO}_3 \cdot \text{Na}$  420.1576, found 420.1576  $[\text{M}+\text{Na}]^+$ .



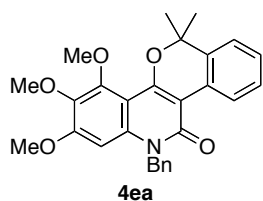

**Analytical data for 4ea:** 39.3 mg, 44%; white solid (m.p. 158.0–158.5 °C); <sup>1</sup>H NMR (400 MHz, CDCl<sub>3</sub>, 25 °C) δ 8.92 (dd, *J* = 8.0, 1.2 Hz, 1 H), 7.36 (dt, *J* = 7.6, 1.2 Hz, 1 H), 7.33–7.19 (m, 7 H), 6.53 (s, 1 H), 5.60 (br s, 2 H), 3.93 (s, 3 H), 3.84 (s, 3 H), 3.72 (s, 3 H), 1.78 (s, 6 H); <sup>13</sup>C NMR (100 MHz, CDCl<sub>3</sub>, 25 °C) δ 161.3, 157.6, 155.8, 151.8, 138.9, 137.1, 137.0, 136.7, 128.9, 127.7, 127.4, 127.3, 127.2, 126.7, 125.6, 121.7, 105.5, 105.4, 94.6, 79.5, 62.1, 61.2, 55.8, 46.8, 27.0; IR (neat) 1631 (C=O) cm<sup>-1</sup>; HRMS (ESI) *m/z* calcd for C<sub>28</sub>H<sub>27</sub>NO<sub>5</sub>•Na 480.1787, found 480.1789 [M+Na]<sup>+</sup>.

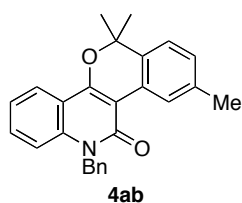

**Analytical data for 4ab:** 66.5 mg, 87%; white solid (m.p. 172.0–172.7 °C); <sup>1</sup>H NMR (400 MHz, CDCl<sub>3</sub>, 25 °C) δ 8.86 (s, 1 H), 8.10 (dd, *J* = 8.0, 1.2 Hz, 1 H), 7.44 (ddd, *J* = 8.8, 7.2, 1.6 Hz, 1 H), 7.34–7.18 (m, 7 H), 7.14 (d, *J* = 1.2 Hz, 2 H), 5.64 (br s, 2 H), 2.41 (s, 3 H), 1.76 (s, 6 H); <sup>13</sup>C NMR (100 MHz, CDCl<sub>3</sub>, 25 °C) δ 161.5, 156.3, 138.7, 137.4, 136.8, 134.3, 131.1, 128.7, 128.6, 127.1, 126.7, 126.5, 126.2, 123.7, 122.1, 121.8, 116.6, 114.6, 106.5, 80.0, 45.8, 27.6, 21.5; IR (neat) 1633 (C=O) cm<sup>-1</sup>; HRMS (ESI) *m/z* calcd for C<sub>26</sub>H<sub>23</sub>NO<sub>2</sub>•Na 404.1627, found 404.1619 [M+Na]<sup>+</sup>.

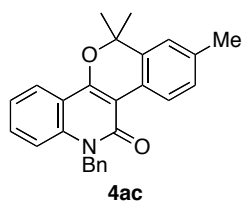

**Analytical data for 4ac:** 63.6 mg, 83%; white solid (m.p. 128.2–129.1 °C); <sup>1</sup>H NMR (400 MHz, CDCl<sub>3</sub>, 25 °C) δ 8.90 (d, *J* = 8.4 Hz, 1 H), 8.09 (dd, *J* = 7.6, 1.2 Hz, 1 H), 7.43 (ddd, *J* = 8.8, 6.8, 1.6 Hz, 1 H), 7.34–7.17 (m, 8 H), 7.04 (d, *J* = 1.2 Hz, 1 H), 5.63 (br s, 2 H), 2.40 (s, 3 H), 1.76 (s, 6 H); <sup>13</sup>C NMR (100 MHz, CDCl<sub>3</sub>, 25 °C) δ 161.5, 155.6, 138.6, 137.7, 137.1, 136.9, 130.9, 128.7, 128.4, 127.1, 126.5, 125.8, 124.1, 123.6, 122.8, 121.7, 116.6, 114.6, 106.6, 79.9, 45.8, 27.6, 21.5; IR (neat) 1633 (C=O) cm<sup>-1</sup>; HRMS (ESI) *m/z* calcd for C<sub>26</sub>H<sub>23</sub>NO<sub>2</sub>•Na 404.1627, found 404.1615 [M+Na]<sup>+</sup>.

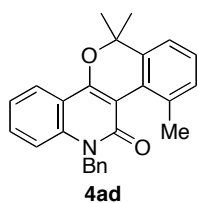

**Analytical data for 4ad:** This compound was obtained as an inseparable mixture with remained **3d** as a yellow foam. Thus, the yield was estimated as 74% by internal standard. Analytical sample was obtained by purification with HPLC; <sup>1</sup>H NMR (400 MHz, CDCl<sub>3</sub>, 25 °C) δ 8.06 (dd, *J* = 8.0, 1.2 Hz, 1 H), 7.44 (ddd, *J* = 8.8, 6.8, 1.6 Hz, 1 H), 7.35–7.17 (m, 9 H), 7.14–7.08 (m, 1 H), 5.65 (br s, 2 H), 2.42 (s, 3 H), 1.74 (s, 6 H); <sup>13</sup>C NMR (100 MHz, CDCl<sub>3</sub>, 25 °C) δ 160.3, 158.0, 140.7, 139.0, 137.1, 135.6, 131.2, 131.0, 128.8, 127.4, 127.1, 126.5, 126.0, 123.2, 121.6, 119.5, 117.0, 114.6, 109.9, 81.6, 46.0, 26.5, 22.9; IR (neat) 1641 (C=O) cm<sup>-1</sup>; HRMS (DART) *m/z* calcd for C<sub>26</sub>H<sub>23</sub>NO<sub>2</sub>•H 382.1807, found 382.1821 [M+H]<sup>+</sup>.

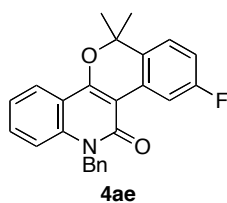

**Analytical data for 4ae:** 69.2 mg, 90%; white solid (m.p. 159.9–160.2 °C); <sup>1</sup>H NMR (400 MHz, CDCl<sub>3</sub>, 25 °C) δ 8.82 (dd, *J* = 7.6, 2.8 Hz, 1 H), 8.10 (dd, *J* = 8.0, 1.2 Hz, 1 H), 7.47 (ddd, *J* = 8.8, 7.2, 2.0 Hz, 1 H), 7.34–7.16 (m, 8 H), 7.00, (dt, *J* = 8.0, 2.8 Hz, 1 H), 5.63 (br s, 2 H), 1.77 (s, 6 H); <sup>13</sup>C NMR (100 MHz, CDCl<sub>3</sub>, 25 °C) δ 162.4 (d, *J* = 242.2 Hz), 161.3, 156.8, 139.0, 136.7, 132.6 (d, *J* = 2.8 Hz), 131.6, 129.1 (d, *J* = 10.5 Hz), 128.8, 127.2, 126.5, 123.9, 123.6 (d, *J* = 8.6 Hz), 121.9, 116.2, 114.7, 114.3 (d, *J* = 22.9 Hz), 112.8 (d, *J* = 25.8 Hz), 105.7 (d, *J* = 1.9 Hz), 80.1, 46.0, 27.7; <sup>19</sup>F NMR (376 MHz, CDCl<sub>3</sub>, 25 °C): δ –113.7; IR (neat) 1763 (C=O), 1637 (C=O) cm<sup>-1</sup>; IR (neat) 1633 (C=O) cm<sup>-1</sup>; HRMS (ESI) *m/z* calcd for C<sub>25</sub>H<sub>20</sub>FNO<sub>2</sub>•Na 408.1376, found 408.1369 [M+Na]<sup>+</sup>.

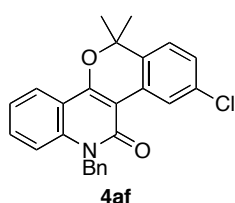

**Analytical data for 4af:** 67.7 mg, 84%; white solid (m.p. 157.5–158.7 °C); <sup>1</sup>H NMR (400 MHz, CDCl<sub>3</sub>, 25 °C) δ 9.10 (d, *J* = 2.0 Hz, 1 H), 8.10 (dd, *J* = 8.0, 1.2 Hz, 1 H), 7.47 (ddd, *J* = 8.4, 5.6, 1.2 Hz, 1 H), 7.35–7.20 (m, 8 H), 7.16 (d, *J* = 8.8 Hz, 1 H), 5.63 (br s, 2 H), 1.76 (s, 6 H); <sup>13</sup>C NMR (100 MHz, CDCl<sub>3</sub>, 25 °C) δ 161.2, 156.8, 139.0, 136.6, 135.1, 134.0, 131.7, 128.8, 128.6, 127.7, 127.2, 126.5, 125.7, 123.8, 123.5, 122.0, 116.2, 114.7, 105.5, 79.9, 45.9, 27.5; IR (neat) 1633 (C=O) cm<sup>-1</sup>; HRMS (ESI) *m/z* calcd for C<sub>25</sub>H<sub>20</sub>ClNO<sub>2</sub>•Na 424.1073, found 424.1080 [M+Na]<sup>+</sup>.

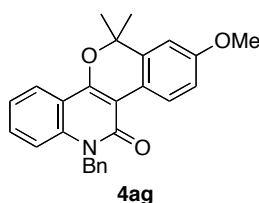

**Analytical data for 4ag:** 65.1 mg, 82%; white solid (m.p. 172.8–173.9 °C); <sup>1</sup>H NMR (400 MHz, CDCl<sub>3</sub>, 25 °C) δ 8.97 (d, *J* = 7.2 Hz, 1 H), 8.07 (dd, *J* = 8.0, 1.2 Hz, 1 H), 7.42 (ddd, *J* = 8.4, 6.8, 1.6 Hz, 1 H), 7.34–7.18 (m, 7 H), 6.90 (dd, *J* = 7.2, 2.8 Hz, 1 H), 6.79 (d, *J* = 2.8 Hz, 1 H), 5.62 (br s, 2 H), 3.86 (s, 3 H), 1.74 (s, 6 H); <sup>13</sup>C NMR (100 MHz, CDCl<sub>3</sub>, 25 °C) δ 161.5, 159.4, 154.7, 139.1, 138.4, 136.9, 130.7, 128.7, 127.5, 127.1, 126.5, 123.4, 121.8, 119.8, 116.6, 114.6, 111.6, 109.2, 106.5, 79.7, 55.3, 45.9, 27.4; IR (neat) 1633 (C=O) cm<sup>-1</sup>; HRMS (ESI) *m/z* calcd for C<sub>26</sub>H<sub>23</sub>NO<sub>3</sub>•Na 420.1576, found 420.1563 [M+Na]<sup>+</sup>.

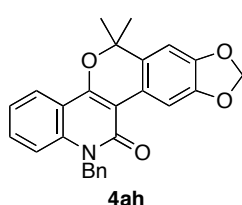

**Analytical data for 4ah:** 65.5 mg, 81%; pale-brown solid (m.p. 216.3–221.4 °C); <sup>1</sup>H NMR (400 MHz, CDCl<sub>3</sub>, 25 °C) δ 8.62 (s, 1 H), 8.07 (dd, *J* = 8.0, 1.2 Hz, 1 H), 7.43 (ddd, *J* = 8.6, 7.0, 1.6 Hz, 1 H), 7.32–7.19 (m, 7 H), 6.75 (s, 1 H), 5.98 (s, 2 H), 5.63 (br s, 2 H), 1.73 (s, 6 H); <sup>13</sup>C NMR (100 MHz, CDCl<sub>3</sub>, 25 °C) δ 161.4, 155.0, 147.2, 146.9, 138.4, 136.8, 131.4, 130.9, 128.7, 127.1, 126.5, 123.4, 121.8, 121.2, 116.4, 114.6, 106.7, 106.6, 103.1, 101.1, 79.8, 45.9, 27.5; IR (neat) 1633 (C=O) cm<sup>-1</sup>; HRMS (ESI) *m/z* calcd for C<sub>26</sub>H<sub>21</sub>NO<sub>4</sub>•Na 434.1368, found 434.1367 [M+Na]<sup>+</sup>.

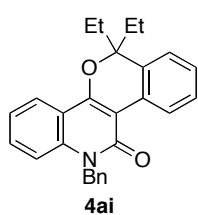

**Analytical data for 4ai:** 62.7 mg, 79%; white solid (m.p. 158.9–159.2 °C);  $^1\text{H}$  NMR (400 MHz,  $\text{CDCl}_3$ , 25 °C)  $\delta$  9.10 (dd,  $J = 8.0$ , 1.2 Hz, 1 H), 8.06 (dd,  $J = 8.0$ , 1.6 Hz, 1 H), 7.44 (ddd,  $J = 8.8$ , 7.2, 1.6 Hz, 1 H), 7.36 (dt,  $J = 8.0$ , 1.6 Hz, 1 H), 7.33–7.18 (m, 8 H), 7.11 (dd,  $J = 7.2$ , 1.6 Hz, 1 H), 5.62 (br s, 2 H), 2.10 (q,  $J = 7.6$  Hz, 4 H), 0.95 (t,  $J = 7.6$  Hz, 6 H);  $^{13}\text{C}$  NMR (100 MHz,  $\text{CDCl}_3$ , 25 °C)  $\delta$  161.6, 156.5, 138.9, 136.9, 133.7, 131.1, 128.7, 128.0, 127.6, 127.3, 127.1, 126.6, 126.0, 123.8, 123.6, 121.8, 116.3, 114.7, 105.5, 85.7, 45.9, 31.1, 8.1; IR (neat) 1633 (C=O)  $\text{cm}^{-1}$ ; HRMS (ESI)  $m/z$  calcd for  $\text{C}_{27}\text{H}_{25}\text{NO}_2 \cdot \text{Na}$  418.1783, found 418.1778  $[\text{M}+\text{Na}]^+$ .

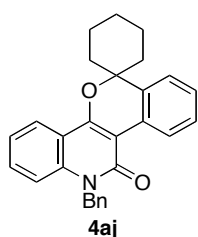

**Analytical data for 4aj:** 59.5 mg, 74%; pale-brown solid (m.p. 219.6–221.5 °C);  $^1\text{H}$  NMR (400 MHz,  $\text{CDCl}_3$ , 25 °C)  $\delta$  9.00 (dd,  $J = 8.0$ , 1.2 Hz, 1 H), 8.17 (dd,  $J = 8.0$ , 1.2 Hz, 1 H), 7.46 (ddd,  $J = 8.0$ , 7.6, 1.2 Hz, 1 H), 7.40–7.21 (m, 10 H), 5.63 (br s, 2 H), 2.37 (br d,  $J = 13.6$  Hz, 2 H), 2.00–1.76 (m, 5 H), 1.71 (br d,  $J = 13.6$  Hz, 2 H), 1.43–1.32 (m, 1 H);  $^{13}\text{C}$  NMR (100 MHz,  $\text{CDCl}_3$ , 25 °C)  $\delta$  161.4, 155.6, 138.9, 137.2, 136.9, 131.1, 128.7, 127.9, 127.7, 127.14, 127.09, 126.6, 125.8, 123.5, 121.92, 121.88, 116.6, 114.7, 107.0, 80.4, 45.9, 34.8, 25.3, 21.7; IR (neat) 1633 (C=O)  $\text{cm}^{-1}$ ; HRMS (ESI)  $m/z$  calcd for  $\text{C}_{28}\text{H}_{25}\text{NO}_2 \cdot \text{Na}$  430.1783, found 430.1775  $[\text{M}+\text{Na}]^+$ .

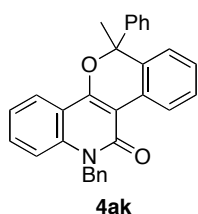

**Analytical data for 4ak:** 60.0 mg, 72%; yellow solid (m.p. 171.5–177.4 °C);  $^1\text{H}$  NMR (400 MHz,  $\text{CDCl}_3$ , 25 °C)  $\delta$  9.01 (dd,  $J = 8.0$ , 1.2 Hz, 1 H), 8.24 (dd,  $J = 8.0$ , 1.6 Hz, 1 H), 7.48–7.42 (m, 2 H), 7.39 (dt,  $J = 7.2$ , 1.6 Hz, 1 H), 7.33–7.19 (m, 13 H), 5.72 (br d,  $J = 16.8$  Hz, 1 H), 5.39 (br d,  $J = 16.8$  Hz, 1 H), 2.18 (s, 3 H);  $^{13}\text{C}$  NMR (100 MHz,  $\text{CDCl}_3$ , 25 °C)  $\delta$  161.2, 156.3, 144.1, 138.8, 136.7, 135.0, 131.2, 128.7, 128.3, 128.0, 127.9, 127.7, 127.6, 127.1, 126.4, 125.9, 125.8, 124.5, 123.5, 122.0, 116.3, 114.7, 107.6, 83.2, 45.9, 28.3; IR (neat) 1633 (C=O)  $\text{cm}^{-1}$ ; HRMS (ESI)  $m/z$  calcd for  $\text{C}_{30}\text{H}_{23}\text{NO}_2 \cdot \text{Na}$  452.1627, found 452.1619  $[\text{M}+\text{Na}]^+$ .

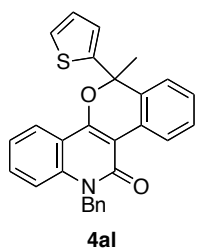

**Analytical data for 4al:** 51.8 mg, 60%; pale-yellow solid (m.p. 192.5–195.3 °C);  $^1\text{H}$  NMR (400 MHz,  $\text{CDCl}_3$ , 25 °C)  $\delta$  9.06 (dd,  $J = 8.0$ , 1.2 Hz, 1 H), 8.18 (dd,  $J = 8.0$ , 1.2 Hz, 1 H), 7.52–7.40 (m, 2 H), 7.37 (dt,  $J = 7.6$ , 1.2 Hz, 1 H), 7.32–7.18 (m, 9 H), 6.80 (dd,  $J = 5.2$ , 3.6 Hz, 1 H), 6.70 (dd,  $J = 3.6$ , 1.2 Hz, 1 H), 5.73 (br d,  $J = 16.8$  Hz, 1 H), 5.43 (br d,  $J = 16.8$  Hz, 1 H), 2.29 (s, 3 H);  $^{13}\text{C}$  NMR (100 MHz,  $\text{CDCl}_3$ , 25 °C)  $\delta$  161.2, 155.8, 148.6, 138.7, 136.7, 134.8, 131.2, 128.7, 128.6, 127.8, 127.6, 127.0, 126.4, 126.2, 126.0,

125.9, 125.7, 123.8, 123.7, 121.9, 116.2, 114.6, 107.3, 80.8, 45.8, 29.0; IR (neat) 1633 (C=O)  $\text{cm}^{-1}$ ; HRMS (ESI)  $m/z$  calcd for  $\text{C}_{28}\text{H}_{21}\text{NO}_2\text{S}\cdot\text{Na}$  458.1191, found 458.1172  $[\text{M}+\text{Na}]^+$ .

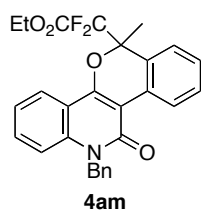

**Analytical data for 4am:** Because of instability under the reaction conditions, 2.5 equivs of **3m** was used. The title compound was purified by short column chromatography and recrystallization; 54.6 mg, 61%; white solid (m.p. 126.8–128.5 °C);  $^1\text{H}$  NMR (400 MHz,  $\text{CDCl}_3$ , 25 °C)  $\delta$  9.21 (d,  $J = 7.6$  Hz, 1 H), 8.01 (dd,  $J = 8.0, 1.6$  Hz, 1 H), 7.52–7.44 (m, 2 H), 7.39–7.34 (m, 2 H), 7.32–7.20 (m, 7 H), 5.69 (br d,  $J = 16.8$  Hz, 1 H), 5.54 (br d,  $J = 16.8$  Hz, 1 H), 4.13 (dq,  $J = 10.8, 7.2$  Hz, 1 H), 4.08 (dq,  $J = 10.8, 7.2$  Hz, 1 H), 2.11 (s, 3 H), 1.02 (t,  $J = 7.2$  Hz, 3 H);  $^{13}\text{C}$  NMR (100 MHz,  $\text{CDCl}_3$ , 25 °C)  $\delta$  162.7 (t,  $J = 31.5$  Hz), 161.0, 155.3, 138.7, 136.6, 131.6, 129.5, 128.7, 128.0, 127.8, 127.7, 127.1, 126.5, 126.0, 125.3, 123.6, 121.9, 115.1, 114.7, 114.2 (t,  $J = 262.2$  Hz), 105.2, 81.5 (t,  $J = 26.2$  Hz), 63.2, 45.9, 22.7, 13.4;  $^{19}\text{F}$  NMR (376 MHz,  $\text{CDCl}_3$ , 25 °C):  $\delta$  -115.3; IR (neat) 1763 (C=O), 1637 (C=O)  $\text{cm}^{-1}$ ; HRMS (ESI)  $m/z$  calcd for  $\text{C}_{28}\text{H}_{23}\text{F}_2\text{NO}_4\cdot\text{Na}$  498.1493, found 498.1495  $[\text{M}+\text{Na}]^+$ .

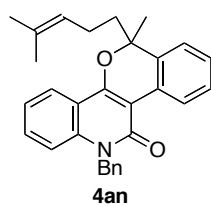

**Analytical data for 4an:** 82.4 mg, 94%; yellow oil;  $^1\text{H}$  NMR (400 MHz,  $\text{CDCl}_3$ , 25 °C)  $\delta$  9.04 (d,  $J = 8.0$  Hz, 1 H), 8.10 (d,  $J = 8.0$  Hz, 1 H), 7.44 (ddd,  $J = 8.0, 7.2, 1.2$  Hz, 1 H), 7.37 (dt,  $J = 7.2, 1.6$  Hz, 1 H), 7.34–7.18 (m, 9 H), 5.63 (br s, 2 H), 5.06 (br s, 1 H), 2.16–2.08 (m, 3 H), 2.01–1.96 (m, 1 H), 1.78 (s, 3 H), 1.62 (s, 3 H), 1.48 (s, 3 H);  $^{13}\text{C}$  NMR (100 MHz,  $\text{CDCl}_3$ , 25 °C)  $\delta$  161.4, 156.0, 138.7, 136.8, 135.9, 132.0, 131.1, 128.7, 127.7, 127.6, 127.1, 127.0, 126.5, 125.8, 123.53, 123.49, 122.8, 121.8, 116.3, 114.6, 106.1, 82.2, 45.8, 39.7, 25.8, 25.5, 22.6, 17.4; IR (neat) 1636 (C=O)  $\text{cm}^{-1}$ ; HRMS (ESI)  $m/z$  calcd for  $\text{C}_{30}\text{H}_{29}\text{NO}_2\cdot\text{Na}$  458.2096, found 458.2091  $[\text{M}+\text{Na}]^+$ .

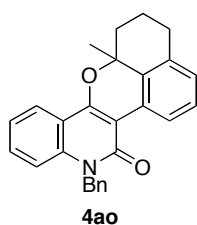

**Analytical data for 4ao:** 25.0 mg, 34%; white solid (m.p. 188.2–191.9 °C);  $^1\text{H}$  NMR (400 MHz,  $\text{CDCl}_3$ , 25 °C)  $\delta$  8.77 (d,  $J = 8.0$  Hz, 1 H), 8.11 (dd,  $J = 8.0, 1.6$  Hz, 1 H), 7.44 (ddd,  $J = 8.8, 7.2, 1.6$  Hz, 1 H), 7.45–7.18 (m, 8 H), 7.10 (d,  $J = 7.2$  Hz, 1 H), 5.75 (br d,  $J = 16.8$  Hz, 1 H), 5.54 (br d,  $J = 16.8$  Hz, 1 H), 2.92–2.88 (m, 2 H), 2.40–2.28 (m, 2 H), 2.18–1.96 (m, 2 H), 1.51 (s, 3 H);  $^{13}\text{C}$  NMR (100 MHz,  $\text{CDCl}_3$ , 25 °C)  $\delta$  161.5, 156.0, 138.7, 136.9, 133.3, 131.3, 131.1, 128.7, 128.4, 127.7, 127.1, 127.0, 126.6, 123.7, 123.2, 121.8, 116.6, 114.6, 107.6, 78.4, 45.9, 35.9, 28.1, 24.5, 20.1; IR (neat) 1633 (C=O)  $\text{cm}^{-1}$ ; HRMS (ESI)  $m/z$  calcd for  $\text{C}_{27}\text{H}_{23}\text{NO}_2\cdot\text{Na}$  416.1627, found 416.1628  $[\text{M}+\text{Na}]^+$ .

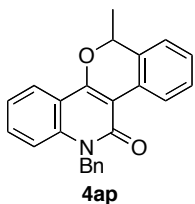

**Analytical data for 4ap:** 27.9 mg, 39%; orange solid (m.p. 157.6–159.1 °C);  $^1\text{H}$  NMR (400 MHz,  $\text{CDCl}_3$ , 25 °C)  $\delta$  8.92 (dd,  $J = 8.0, 1.2$  Hz, 1 H), 8.09 (dd,  $J = 8.0, 1.6$  Hz, 1 H), 7.45 (ddd,  $J = 8.4, 7.2, 1.6$  Hz, 1 H), 7.40 (dt,  $J = 8.0, 1.2$  Hz, 1 H), 7.35–7.14 (m, 9 H), 5.80–5.43 (br m, 2 H), 5.53 (q,  $J = 6.4$  Hz, 1 H), 1.73 (d,  $J = 6.4$  Hz, 3 H);  $^{13}\text{C}$  NMR (100 MHz,  $\text{CDCl}_3$ , 25 °C)  $\delta$  161.5, 156.9, 138.8, 136.8, 133.1, 131.3, 128.8, 128.3, 127.8, 127.6, 127.1, 126.6, 125.6, 123.6, 123.1, 121.9, 116.3, 114.7, 107.0, 75.3, 45.9, 20.1; IR (neat) 1633 (C=O)  $\text{cm}^{-1}$ ; HRMS (ESI)  $m/z$  calcd for  $\text{C}_{24}\text{H}_{19}\text{NO}_2\cdot\text{Na}$  376.1314, found 376.1303  $[\text{M}+\text{Na}]^+$ .

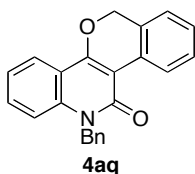

**Analytical data for 4aq:** 11.9 mg, 17%; orange solid (m.p. 130.4–132.3 °C);  $^1\text{H}$  NMR (400 MHz,  $\text{CDCl}_3$ , 25 °C)  $\delta$  8.86 (d,  $J = 8.0$  Hz, 1 H), 8.06 (dd,  $J = 7.6, 1.6$  Hz, 1 H), 7.45 (ddd,  $J = 8.4, 7.2, 1.6$  Hz, 1 H), 7.42 (t,  $J = 6.8, 1$  H), 7.35–7.14 (m, 9 H), 5.64 (br s, 2 H), 5.34 (s, 2 H);  $^{13}\text{C}$  NMR (100 MHz,  $\text{CDCl}_3$ , 25 °C)  $\delta$  161.4, 158.3, 138.7, 136.8, 131.4, 128.8, 128.7, 128.6, 128.5, 127.7, 127.2, 126.6, 125.4, 123.8, 123.6, 121.9, 115.8, 114.8, 107.7, 69.5, 45.8; IR (neat) 1633 (C=O)  $\text{cm}^{-1}$ ; HRMS (ESI)  $m/z$  calcd for  $\text{C}_{23}\text{H}_{17}\text{NO}_2\cdot\text{Na}$  362.1157, found 362.1149  $[\text{M}+\text{Na}]^+$ .

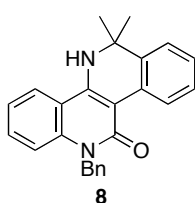

**Analytical data for 8:** 64.6 mg, 88%; white solid (m.p. 150.2–153.8 °C);  $^1\text{H}$  NMR (400 MHz,  $\text{CDCl}_3$ , 25 °C)  $\delta$  9.05 (d,  $J = 8.4$  Hz, 1 H), 7.60 (dd,  $J = 7.2, 1.2$  Hz, 1 H), 7.42 (ddd,  $J = 8.8, 7.2, 1.6$  Hz, 1 H), 7.37–7.15 (m, 10 H), 5.61 (br s, 2 H), 4.91 (br s, 1 H), 1.63 (s, 6 H);  $^{13}\text{C}$  NMR (100 MHz,  $\text{CDCl}_3$ , 25 °C) (one overlapping  $\text{C}_{sp^2}$  signal)  $\delta$  160.9, 145.2, 138.9, 137.6, 137.3, 130.6, 129.6, 128.7, 127.0, 126.9, 126.5, 126.0, 122.0, 121.3, 120.3, 115.7, 114.3, 102.3, 53.7, 45.7, 29.6; IR (neat) 3338 (N–H), 1606 (C=O)  $\text{cm}^{-1}$ ; HRMS (ESI)  $m/z$  calcd for  $\text{C}_{25}\text{H}_{22}\text{N}_2\text{O}\cdot\text{Na}$  389.1630, found 389.1622  $[\text{M}+\text{Na}]^+$ .

Three-component coupling products **10a,b** and **11** were also obtained under the Catellani reaction condition.

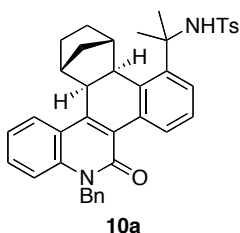

**Analytical data for 10a:** 103.3 mg, 85%; white solid (m.p. 203.4–205.3 °C);  $^1\text{H}$  NMR (400 MHz,  $\text{CDCl}_3$ , 25 °C)  $\delta$  9.27 (dd,  $J = 8.4, 1.2$  Hz, 1 H), 7.69 (dd,  $J = 7.2, 1.2$  Hz, 1 H), 7.48–7.21 (m, 11 H), 7.20 (t,  $J = 8.0$  Hz, 1 H), 6.92 (d,  $J = 8.0$  Hz, 2 H), 5.86 (br d,  $J = 13.6$  Hz, 1 H), 5.42 (br d,  $J = 13.6$  Hz, 1 H), 4.72 (s, 1 H), 3.80 (d,  $J = 9.2$  Hz, 1 H), 3.29 (d,  $J = 9.6$  Hz, 1 H), 2.19 (d,  $J = 3.2$  Hz, 1 H), 2.00 (s, 1 H), 1.98 (s, 3 H), 1.80 (s, 6 H), 1.79–1.51 (m, 4 H), 1.65 (d,  $J = 11.0$  Hz, 1 H), 1.00 (d,  $J = 11.0$  Hz, 1 H);  $^{13}\text{C}$  NMR (100 MHz,

CDCl<sub>3</sub>, 25 °C) δ 160.3, 143.2, 142.7, 139.4, 139.1, 138.8, 136.8, 136.6, 132.3, 129.8, 129.0, 128.8, 128.1, 127.5, 127.2, 127.0, 126.6, 125.7, 124.9, 123.8, 122.0, 120.0, 115.0, 60.3, 51.5, 46.8, 46.5, 44.9, 42.6, 33.6, 33.4, 31.2, 30.6, 29.2, 20.8; IR (neat) 3271 (N–H), 1630 (C=O) cm<sup>-1</sup>; HRMS (ESI) *m/z* calcd for C<sub>39</sub>H<sub>38</sub>N<sub>2</sub>O<sub>3</sub>S•Na 637.2501, found 637.2494 [M+Na]<sup>+</sup>.

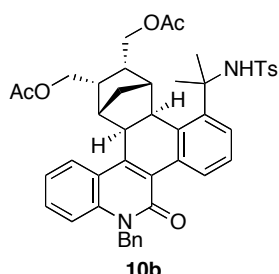

**Analytical data for 10b:** 76.5 mg, 51%; brown solid (m.p. 114.2–115.4 °C); <sup>1</sup>H NMR (400 MHz, CDCl<sub>3</sub>, 25 °C) δ 9.20 (d, *J* = 8.0 Hz, 1 H), 7.85 (d, *J* = 8.0 Hz, 1 H), 7.47 (d, *J* = 8.0 Hz, 2 H), 7.41–7.14 (m, 10 H), 7.03 (d, *J* = 8.0 Hz, 2 H), 5.84 (br s, 1 H), 5.44 (br s, 1 H), 5.15 (s, 1 H), 4.73 (dd, *J* = 10.4, 6.0 Hz, 1 H), 4.68 (d, *J* = 9.2 Hz, 1 H), 4.61–4.55 (m, 1 H), 4.41 (dd, *J* = 12.0, 6.4 Hz, 1 H), 4.19 (t, *J* = 11.4 Hz, 1 H), 3.60 (d, *J* = 9.6 Hz, 1 H), 2.57 (br s, 1 H), 2.45 (br s, 1 H), 2.31 (s, 2 H), 2.21 (s, 3 H), 2.14 (s, 3 H), 2.07 (s, 3 H), 1.98 (d, *J* = 11.2 Hz, 1 H), 1.85 (s, 3 H), 1.70 (s, 3 H), 1.22 (d, *J* = 12.0 Hz, 1 H); <sup>13</sup>C NMR (100 MHz, CDCl<sub>3</sub>, 25 °C) δ 171.0, 170.5, 160.1, 142.8, 140.7, 139.8, 138.7, 136.6, 135.0, 133.2, 129.7, 129.4, 128.7, 128.2, 127.1 (2C), 126.7, 126.5, 125.9, 125.2, 124.7, 121.7, 119.8, 114.9, 62.5, 62.3, 60.7, 52.8, 49.2, 46.5, 42.2, 39.7, 38.2, 36.5, 35.7, 33.4, 32.1, 21.18, 21.11; IR (neat) 3253 (N–H), 1739 (C=O), 1633 (C=O) cm<sup>-1</sup>; HRMS (ESI) *m/z* calcd for C<sub>45</sub>H<sub>46</sub>N<sub>2</sub>O<sub>7</sub>S•Na 781.2923, found 781.2904 [M+Na]<sup>+</sup>.

The reaction of **2a** with **3o** afforded an inseparable mixture of **S3** and **S4** (35.5 mg) in a ratio of **S3/S4** = 2:1. Analytically pure sample of **S4** was obtained by partial separation using preparative HPLC. In comparison with the spectral data of **10**, **S4** was tentatively assigned as the three-component annulation product. Although **S4** was obtained as a single diastereomer, its stereochemistry could not be elucidated. The structure of **S3** was tentatively assigned as a singlet of the C4 proton of the quinolone ring was observed at δ 7.69 ppm.

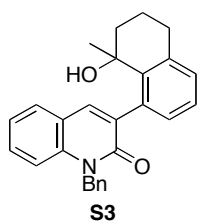

**Analytical data for S3:** 21.9 mg, 28% based on <sup>1</sup>H NMR analysis; colorless oil; <sup>1</sup>H NMR (400 MHz, CDCl<sub>3</sub>, 25 °C) δ 7.69 (s, 1 H), 7.59 (dd, *J* = 8.0, 1.2 Hz, 1 H), 7.44 (ddd, *J* = 8.8, 7.2, 1.6 Hz, 1 H), 7.34 (d, *J* = 8.8 Hz, 1 H), 7.33–7.22 (m, 5 H), 7.22 (d, *J* = 6.8 Hz, 1 H), 7.21 (d, *J* = 6.8 Hz, 1 H), 7.17 (d, *J* = 7.2 Hz, 1 H), 6.97 (dd, *J* = 7.2, 1.2 Hz, 1 H), 5.72 (br d, *J* = 15.8 Hz, 1 H), 5.52 (br d, *J* = 15.8 Hz, 1 H), 3.01–2.84 (m, 2 H), 2.09–1.76 (m, 4 H), 1.75 (br s, 1 H), 1.40 (s, 3 H); <sup>13</sup>C NMR (100 MHz, CDCl<sub>3</sub>, 25 °C) δ 164.1, 141.8, 138.8, 137.9, 137.5, 137.3, 136.4, 136.2, 130.2, 130.1, 128.8, 128.7, 127.3, 126.9, 126.8, 122.5, 121.1, 115.1, 71.1, 46.8, 41.8, 31.1, 30.2, 20.0; IR (neat) 3365 (O–H), 1631 (C=O) cm<sup>-1</sup>; HRMS (ESI) *m/z* calcd for C<sub>27</sub>H<sub>25</sub>NO<sub>2</sub>•Na 418.1783, found 418.1792 [M+Na]<sup>+</sup>.

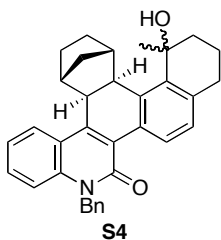

**Analytical data for S4:** 13.6 mg, 14% based on  $^1\text{H}$  NMR analysis; single diastereomer; white solid (m.p. 191.4–195.0 °C);  $^1\text{H}$  NMR (400 MHz,  $\text{CDCl}_3$ , 25 °C)  $\delta$  7.41 (t,  $J = 7.8$  Hz, 1 H), 7.33–7.19 (m, 6 H), 7.15 (d,  $J = 8.0$  Hz, 1 H), 7.07 (d,  $J = 7.2$  Hz, 1 H), 7.02 (d,  $J = 8.8$  Hz, 1 H), 6.96 (d,  $J = 7.2$  Hz, 1 H), 5.61 (d,  $J = 15.6$  Hz, 1 H), 5.35 (d,  $J = 15.6$  Hz, 1 H), 3.99 (br s, 1 H), 3.35 (d,  $J = 6.0$  Hz, 1 H), 3.00 (d,  $J = 6.0$  Hz, 1 H), 2.98–2.84 (m, 2 H), 2.53 (d,  $J = 3.6$  Hz, 1 H), 2.41 (d,  $J = 3.6$  Hz, 1 H), 2.04–1.74 (m, 4 H), 1.66–1.46 (m, 4 H), 1.39 (s, 3 H), 1.44–1.14 (m, 2 H);  $^{13}\text{C}$  NMR (100 MHz,  $\text{CDCl}_3$ , 25 °C)  $\delta$  154.6, 150.2, 148.5, 144.1, 141.9, 137.9, 136.7, 136.0, 133.8, 131.7, 131.4, 129.9, 128.7, 128.3, 127.2, 126.4, 117.5, 110.9, 70.8, 60.4, 54.0, 53.4, 46.5, 42.3, 41.3, 32.7, 31.5, 29.5, 29.2, 28.7, 20.1; IR (neat) 3396 (O–H), 1631 (C=O)  $\text{cm}^{-1}$ ; HRMS (ESI)  $m/z$  calcd for  $\text{C}_{34}\text{H}_{33}\text{NO}_2 \cdot \text{Na}$  510.2409, found 510.2384  $[\text{M}+\text{Na}]^+$ .

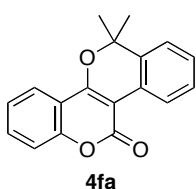

**Synthesis of 4fa:** A solution of 4-iodocoumarin **2f** (30.0 mg, 0.11 mmol), 2-(2-bromophenyl)propan-2-ol **3a** (23.7 mg, 0.11 mmol),  $\text{Pd}(\text{OAc})_2$  (1.2 mg, 0.006 mmol),  $\text{P}(\text{2-furyl})_3$  (2.6 mg, 0.011 mmol), norbornene (10.4 mg, 0.11 mmol), and  $\text{K}_2\text{CO}_3$  (38.1 mg, 0.28 mmol) in dry *m*-xylene (2.2 mL) was degassed at  $-78$  °C. The reaction mixture was heated at 140 °C for 18 h. After cooling to room temperature, the crude mixture was purified by flash column chromatography on silica gel (hexane/EtOAc = 20:1~8:1) to afford **4fa** (25.0 mg, 82%) as a yellow foam:  $^1\text{H}$  NMR (400 MHz,  $\text{CDCl}_3$ , 25 °C)  $\delta$  8.68 (d,  $J = 8.0$  Hz, 1 H), 7.91 (dd,  $J = 8.0, 1.2$  Hz, 1 H), 7.57 (ddd,  $J = 8.0, 7.2, 1.2$  Hz, 1 H), 7.40 (dt,  $J = 8.0, 1.2$  Hz, 1 H), 7.36–7.29 (m, 3 H), 7.22 (d,  $J = 8.0$  Hz, 1 H), 1.78 (s, 6 H);  $^{13}\text{C}$  NMR (100 MHz,  $\text{CDCl}_3$ , 25 °C)  $\delta$  160.2, 159.2, 152.9, 136.0, 132.3, 128.3, 128.1, 125.1, 125.0, 123.9, 123.1, 122.3, 116.3, 115.8, 101.4, 81.5, 27.8; IR (neat) 1714 (C=O)  $\text{cm}^{-1}$ ; HRMS (ESI)  $m/z$  calcd for  $\text{C}_{18}\text{H}_{14}\text{O}_3 \cdot \text{Na}$  301.0841, found 301.0864  $[\text{M}+\text{Na}]^+$ .

## 5. Control Experiments

**Reaction of 2a with 3a in the absence of norbornene.** Homo coupling product **5** was obtained under the Catellani reaction conditions, except for using 10 mol % of  $\text{Pd}(\text{OAc})_2$  in the absence of norbornene.

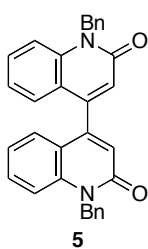

**Analytical data for 5:** 64.6 mg, 88%; white solid (m.p. 246.8–249.7 °C);  $^1\text{H}$  NMR (400 MHz,  $\text{CDCl}_3$ , 25 °C)  $\delta$  7.47 (ddd,  $J = 8.4, 7.2, 1.2$  Hz, 2 H), 7.42–7.27 (m, 14 H), 7.08 (ddd,  $J = 8.0, 7.2, 0.8$  Hz, 2 H), 6.87 (s, 2 H), 5.70 (br d,  $J = 15.6$  Hz, 2 H), 5.62 (br d,  $J = 15.6$  Hz, 2 H);  $^{13}\text{C}$  NMR (100 MHz,  $\text{CDCl}_3$ , 25 °C)  $\delta$  161.6, 146.6, 139.6, 136.1, 131.3, 128.9, 127.5, 126.7, 122.5, 121.8, 119.9, 115.5, 46.3; IR (neat) 1652 (C=O)  $\text{cm}^{-1}$ ; HRMS (ESI)  $m/z$  calcd for  $\text{C}_{32}\text{H}_{24}\text{N}_2\text{O}_2 \cdot \text{Na}$  491.1736, found 491.1747  $[\text{M}+\text{Na}]^+$ .

**Reaction of 2a with *o*-bromophenol.** 4-aryloxy-2-quinolone **6b** was obtained under the Catellani reaction conditions, except for using 10 mol % of Pd(OAc)<sub>2</sub> and 1 equiv of norbornene.

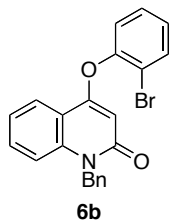

**Analytical data for 6b:** 21.7 mg, 27%; white solid (m.p. 246.8–249.7 °C); <sup>1</sup>H NMR (400 MHz, CDCl<sub>3</sub>, 25 °C) δ 8.23 (dd, *J* = 7.6, 1.2 Hz, 1 H), 7.71 (dd, *J* = 8.0, 1.2 Hz, 1 H), 7.51 (dt, *J* = 7.6, 1.6 Hz, 1 H), 7.43 (dt, *J* = 7.6, 1.6 Hz, 1 H), 7.34–7.18 (m, 9 H), 5.76 (s, 1 H), 5.53 (br s, 2 H); <sup>13</sup>C NMR (100 MHz, CDCl<sub>3</sub>, 25 °C) δ 163.5, 161.7, 150.3, 139.6, 136.5, 134.3, 131.7, 129.2, 128.8, 127.7, 127.2, 126.5, 123.6, 122.1, 116.4, 116.0, 115.1, 100.0, 45.7; IR (neat) 1647 (C=O) cm<sup>-1</sup>; HRMS (ESI) *m/z* calcd for C<sub>22</sub>H<sub>16</sub>BrNO<sub>2</sub>•Na 428.0262 found 428.0268 [M+Na]<sup>+</sup>.

**Preparation of 2a-d<sub>1</sub>:** To a solution of methyl 3-(2-(benzyl(*tert*-butoxycarbonyl)amino)phenyl)propiolate (182.9 mg, 0.5 mmol) in acetic acid-*d*<sub>4</sub> (1 mL) was added sodium iodide (448.7 mg, 3.0 mmol) at room temperature. The reaction mixture was stirred at 110 °C for 1 h. The reaction was quenched with H<sub>2</sub>O (10 mL) and the resultant mixture was extracted with EtOAc (3 × 10 mL). The combined organic layer was washed with sat. Na<sub>2</sub>CO<sub>3</sub> (10 mL), sat. Na<sub>2</sub>S<sub>2</sub>O<sub>3</sub> (10 mL), and brine (10 mL). After dried over MgSO<sub>4</sub>, the solvents were removed in vacuo. The obtained crude material was purified by flash column chromatography on silica gel (hexane/EtOAc = 8:1) to afford 4-iodo-2-quinolone **2a-d<sub>1</sub>** (85%D, 169.2 mg, 94%) as a white solid (m.p. 125.1–127.1 °C).

**Competition experiment using 2a-d<sub>1</sub>:** In a similar manner with the reaction of **2a** with **3a**, the reaction of 4-iodo-2-quinolone **2a** (51.1 mg, 0.14 mmol) and **2a-d<sub>1</sub>** (85%D, 72.4 mg, 0.20 mmol) with 2-(2-bromophenyl)propan-2-ol **3a** (37.0 mg, 0.17 mmol) was performed in the presence of Pd(OAc)<sub>2</sub> (1.97 mg, 0.009 mmol), norbornene (37.0 mg, 0.17 mmol), and K<sub>2</sub>CO<sub>3</sub> (58.8 mg, 0.42 mmol) in dry DMF (3.4 mL) at 105 °C for 1 h. After an usual purification, **2a-d<sub>1</sub>** (51%D, 60.0 mg, 49%) was recovered along with **4aa** (52.9 mg, 42%).

## 6. Single Crystal X-ray Diffraction Study

A single crystal of **10a** was mounted on a glass fiber, and diffraction data were collected in  $\theta$  ranges specified in Table S1 at 123 K on a Bruker D8 QUEST diffractometer with graphite monochromatized Mo K $\alpha$  radiation ( $\lambda = 0.71073$  Å). The absorption correction was made using SADABS. The structure was solved by direct methods and refined by the full-matrix least-squares on  $F^2$  by using SHELXL-2013.<sup>12</sup> All non-hydrogen atoms were refined with anisotropic displacement parameters. All hydrogen atoms were placed in calculated positions. Final refinement details are compiled in Table S1. The supplementary crystallographic data

<sup>12</sup> Sheldrick, G. M. SHELXL-2013, Bruker AXS Inc., Madison, Wisconsin, 2013.



for this paper (CCDC 1557549) can also be obtained free of charge via [www.ccdc.cam.ac.uk/conts/retrieving.html](http://www.ccdc.cam.ac.uk/conts/retrieving.html) (or from the Cambridge Crystallographic Data Centre, 12, Union Road, Cambridge CB2 1EZ, UK; fax: +44 1223 336033; or [deposit@ccdc.cam.ac.uk](mailto:deposit@ccdc.cam.ac.uk)).

**Table S1.** Selected crystallographic data and collection parameters for **10a**.

|                                                                              |                                                                           |
|------------------------------------------------------------------------------|---------------------------------------------------------------------------|
| formula                                                                      | C <sub>39</sub> H <sub>38</sub> N <sub>2</sub> O <sub>3</sub> S           |
| fw                                                                           | 614.77                                                                    |
| crystal system                                                               | monoclinic                                                                |
| space group                                                                  | P21/c                                                                     |
| <i>a</i> , Å                                                                 | 16.5942(7)                                                                |
| <i>b</i> , Å                                                                 | 8.7199(4)                                                                 |
| <i>c</i> , Å                                                                 | 21.4742(10)                                                               |
| $\beta$ , deg                                                                | 93.5160(10)                                                               |
| volume, Å <sup>3</sup>                                                       | 3101.5(2)                                                                 |
| <i>Z</i>                                                                     | 4                                                                         |
| <i>D</i> (calcd), Mg m <sup>-3</sup>                                         | 1.317                                                                     |
| $\mu$ , mm <sup>-1</sup>                                                     | 0.147                                                                     |
| <i>F</i> (000)                                                               | 1304                                                                      |
| crystal size, mm                                                             | 0.25 x 0.2 x 0.05                                                         |
| $\theta$ range for data collection, deg                                      | 2.33 to 25.04                                                             |
| index ranges                                                                 | -19 ≤ <i>h</i> ≤ 17, -10 ≤ <i>k</i> ≤ 10, -24 ≤ <i>l</i> ≤ 25             |
| reflections collected                                                        | 20548                                                                     |
| independent reflections [ <i>R</i> (int)]                                    | 5453 [ <i>R</i> (int) = 0.0258]                                           |
| coverage of independent reflections                                          | 99.4%                                                                     |
| max. and min. transmission                                                   | 0.9930/0.9640                                                             |
| data / restraints / parameters                                               | 5453 / 0 / 410                                                            |
| goodness-of-fit on <i>F</i> <sup>2</sup>                                     | 1.038                                                                     |
| <i>R</i> <sub>1</sub> , <i>wR</i> <sub>2</sub> [ <i>I</i> > 2σ( <i>I</i> )]/ | 0.0371, 0.0940                                                            |
| <i>R</i> <sub>1</sub> , <i>wR</i> <sub>2</sub> (all data)                    | 0.0455, 0.0992                                                            |
| Weighting scheme                                                             | $w = 1/[\sigma^2(F_o^2) + (0.0454P)^2]$<br>Where $P = (F_o^2 + 2F_c^2)/3$ |
| extinction coefficient                                                       | 0.0058(5)                                                                 |
| largest diff. peak and hole, e Å <sup>-3</sup>                               | 0.400 and -0.756                                                          |
| R.M.S. deviation from mean, e Å <sup>-3</sup>                                | 0.048                                                                     |

## 7. DFT Calculations

The Gaussian 09 program package was used for all geometry optimizations.<sup>13</sup> The geometries of the stationary points and transition states were fully optimized using the Becke's three-parameter hybrid density functional method (B3LYP)<sup>14</sup> with a double- $\zeta$  basis set with the relativistic effective core potential of Hay and Wadt (LanL2DZ)<sup>15</sup> for Pd, K, Br, and I and the 6-31G(d)<sup>16</sup> basis sets for other elements. The vibrational frequencies and thermal correction to Gibbs free energy (TCGFE) including zero-point energy were calculated at the same level of theory. The obtained structures were characterized by the number of imaginary frequencies (IF, one or zero for transition or ground states, respectively). The connectivity of each step was also confirmed by intrinsic reaction coordinate (IRC) calculation<sup>17</sup> from the transition states followed by optimization of the resultant geometries. Single-point energies for geometries obtained by the above method were calculated using the Truhlar's M06L functional<sup>18</sup> with the basis sets including the Stuttgart-Dresden-Bonn energy-consistent pseudopotential (SDD)<sup>19</sup> for Pd, K, Br, and I, and the 6-311++G(d,p) basis sets<sup>20</sup> for other elements. To examine the solvent effect, the above single-point energy calculations were performed using the polarizable continuum model (PCM)<sup>21</sup> method with

---

<sup>13</sup> Gaussian 09, Revision C.01, Frisch, M. J.; Trucks, G. W.; Schlegel, H. B.; Scuseria, G. E.; Robb, M. A.; Cheeseman, J. R.; Scalmani, G.; Barone, V.; Mennucci, B.; Petersson, G. A.; Nakatsuji, H.; Caricato, M.; Li, X.; Hratchian, H. P.; Izmaylov, A. F.; Bloino, J.; Zheng, G.; Sonnenberg, J. L.; Hada, M.; Ehara, M.; Toyota, K.; Fukuda, R.; Hasegawa, J.; Ishida, M.; Nakajima, T.; Honda, Y.; Kitao, O.; Nakai, H.; Vreven, T.; Montgomery, Jr., J. A.; Peralta, J. E.; Ogliaro, F.; Bearpark, M.; Heyd, J. J.; Brothers, E.; Kudin, K. N.; Staroverov, V. N.; Kobayashi, R.; Normand, J.; Raghavachari, K.; Rendell, A.; Burant, J. C.; Iyengar, S. S.; Tomasi, J.; Cossi, M.; Rega, N.; Millam, J. M.; Klene, M.; Knox, J. E.; Cross, J. B.; Bakken, V.; Adamo, C.; Jaramillo, J.; Gomperts, R.; Stratmann, R. E.; Yazyev, O.; Austin, A. J.; Cammi, R.; Pomelli, C.; Ochterski, J. W.; Martin, R. L.; Morokuma, K.; Zakrzewski, V. G.; Voth, G. A.; Salvador, P.; Dannenberg, J. J.; Dapprich, S.; Daniels, A. D.; Farkas, Ö.; Foresman, J. B.; Ortiz, J. V.; Cioslowski, J.; Fox, D. J., Gaussian, Inc., Wallingford CT, 2009.

<sup>14</sup> (a) Kohn, W.; Becke, A. D.; Parr, R. G. *J. Phys. Chem.* **1996**, *100*, 12974-12980. (b) Stephens, P. J.; Devlin, F. J.; Chabalowski, C. F.; Frisch, M. J. *J. Phys. Chem.* **1994**, *98*, 11623-11627. (c) Becke, A. D. *J. Chem. Phys.* **1993**, *98*, 5648-5652. (d) Lee, C.; Yang, W.; Parr, R. G. *Phys. Rev. B* **1988**, *37*, 785-789.

<sup>15</sup> Hay, P. J.; Wadt, W. R. *J. Chem. Phys.* **1985**, *82*, 299-310.

<sup>16</sup> (a) Hehre, W. J.; Ditchfield, R.; Pople, J. A. *J. Chem. Phys.* **1972**, *56*, 2257-2261. (b) Hariharan, P. C.; Pople, J. A. *Theor. Chim. Acta* **1973**, *28*, 213-222. (c) Frisch, M. M.; Pietro, W. J.; Hehre, W. J.; Binkley, J. S.; Gordon, M. S.; DeFrees, D. J.; Pople, J. A. *J. Chem. Phys.* **1982**, *77*, 3654-3665.

<sup>17</sup> (a) Fukui, K. *Acc. Chem. Res.* **1981**, *14*, 363-368. (b) Gonzalez, C.; Schlegel, H. B. *J. Chem. Phys.* **1989**, *90*, 2154-2161. (c) Gonzalez, C.; Schlegel, H. B. *J. Phys. Chem.* **1990**, *94*, 5523-5527.

<sup>18</sup> Zhao, Y.; Truhlar, D. G. *Acc. Chem. Res.* **2008**, *41*, 157-167.

<sup>19</sup> Andrae, D.; Häussermann, U.; Dolg, M.; Stoll, H.; Preuß, H. *Theor. Chim. Acta* **1990**, *77*, 123-141.

<sup>20</sup> (a) Krishnan, R.; Binkley, J. S.; Seeger, R.; Pople, J. A. *J. Chem. Phys.* **1980**, *72*, 650-654. (b) McLean, A. D.; Chandler, G. S. *J. Chem. Phys.* **1980**, *72*, 5639-5648. (c) Frisch, M. J.; Pople, J. A.; Binkley, J. S. *J. Chem. Phys.* **1984**, *80*, 3265-3269. (d) Clark, T.; Chandrasekhar, J.; Spitznagel, G. W.; Schleyer, P. v. R. *J. Comp. Chem.* **1983**, *4*, 294-301.

<sup>21</sup> (a) Miertuš, S.; Scrocco, E.; Tomasi, J. *J. Chem. Phys.* **1981**, *55*, 117-129. (b) Pascual-Ahuir, J. L.; Silla, E.; Tomasi, J.; Bonaccorsi, R. *J. Comput. Chem.* **1987**, *8*, 778-787. (c) Floris, F.; Tomasi, J. *J. Comput. Chem.* **1989**, *10*, 616-627. (d) Cossi, M.; Barone, V.; Cammi, R.; Tomasi, J. *J. Chem. Phys. Lett.* **1996**, *255*, 327-335. (e) Cancès, E.; Mennucci, B.; Tomasi, J. *J. Chem. Phys.* **1997**, *22*, 3032-3041. (f)

dielectric constants ( $\epsilon$ ) of 37.219 for DMF. The obtained energies, ZPEs, TCGFEs, and IF are summarized in Tables S1 and S2.

**Table S1.** Summary of theoretical calculations.

| Model                  | Energy/au      | TCGFE/au | IF/cm <sup>-1</sup> |
|------------------------|----------------|----------|---------------------|
| <b>A</b>               | -903.92380121  | 0.208200 |                     |
| <b>TS<sub>AB</sub></b> | -903.91752127  | 0.208824 | 90.6105i            |
| <b>B</b>               | -903.95240808  | 0.208546 |                     |
| <b>C</b>               | -928.15699874  | 0.262028 |                     |
| <b>TS<sub>CD</sub></b> | -928.15480827  | 0.264639 | 186.7456i           |
| <b>D</b>               | -928.19347245  | 0.267841 |                     |
| <b>E</b>               | -1185.15306660 | 0.304747 |                     |
| <b>TS<sub>EF</sub></b> | -1185.12721816 | 0.302948 | 1158.9234i          |
| <b>F</b>               | -1185.15737748 | 0.307417 |                     |
| <b>G</b>               | -1275.72843281 | 0.37030  |                     |
| <b>TS<sub>GH</sub></b> | -1275.71791518 | 0.374412 | 183.3263i           |
| <b>H</b>               | -1275.76040296 | 0.375902 |                     |
| <b>TS<sub>HI</sub></b> | -1275.74269491 | 0.376440 | 293.3224i           |
| <b>I</b>               | -1275.77716853 | 0.376514 |                     |
| <b>TS<sub>IJ</sub></b> | -1275.74207050 | 0.371758 | 216.5692i           |
| <b>J</b>               | -1275.76300169 | 0.368791 |                     |
| <b>K</b>               | -1259.96674081 | 0.264666 |                     |
| <b>TS<sub>KL</sub></b> | -1259.95703610 | 0.261685 | 183.1084i           |
| <b>L</b>               | -1259.96373424 | 0.262421 |                     |
| <b>M</b>               | -1259.94610607 | 0.263780 | 18.4857i            |
| <b>N</b>               | -1259.94765157 | 0.262201 |                     |
| <b>O</b>               | -1237.51654708 | 0.309351 |                     |
| <b>TS<sub>OP</sub></b> | -1237.48926672 | 0.307520 | 285.5029i           |
| <b>P</b>               | -1237.53496141 | 0.308553 |                     |
| <b>DMF</b>             | -248.55653071  | 0.073913 |                     |
| <b>NBE</b>             | -272.75700877  | 0.125076 |                     |
| <b>KOAc</b>            | -256.95553030  | 0.015930 |                     |
| <b>3q</b>              | -359.58744560  | 0.087729 |                     |
| <b>AcOH•KI</b>         | -269.01218346  | 0.026055 |                     |
| <b>AcOH•KBr</b>        | -270.98715185  | 0.026425 |                     |

**Table S2.** Summary of theoretical calculations.

| Model                   | Energy/au      | TCGFE/au | IF/cm <sup>-1</sup> |
|-------------------------|----------------|----------|---------------------|
| <b>a</b>                | -1180.74998304 | 0.282833 |                     |
| <b>TS<sub>ab</sub></b>  | -1180.66655689 | 0.276263 | 1452.2522i          |
| <b>b</b>                | -1180.74762287 | 0.281407 |                     |
| <b>sG</b>               | -1354.36647709 | 0.426254 |                     |
| <b>TS<sub>sGH</sub></b> | -1354.35771842 | 0.428265 | 177.35333i          |
| <b>sH</b>               | -1354.40327149 | 0.430054 |                     |
| <b>TS<sub>sHI</sub></b> | -1354.38681257 | 0.430146 | 284.8040i           |
| <b>sI</b>               | -1354.41635366 | 0.429870 |                     |
| <b>TS<sub>sIJ</sub></b> | -1354.38036698 | 0.425249 | 218.9568i           |
| <b>sJ</b>               | -1354.39827864 | 0.423347 |                     |
| <b>sK</b>               | -1338.60414126 | 0.317568 |                     |
| <b>TS<sub>sKL</sub></b> | -1338.59692906 | 0.315178 | 158.5032i           |
| <b>sL</b>               | -1338.60227920 | 0.317204 |                     |
| <b>sN</b>               | -1338.58196257 | 0.317234 | 120.4171i*          |
| <b>sO</b>               | -1316.15156516 | 0.362564 |                     |
| <b>TS<sub>sOP</sub></b> | -1316.13181474 | 0.361192 | 249.2817i           |
| <b>sP</b>               | -1316.18100897 | 0.359778 |                     |
| <b>3a</b>               | -438.22767274  | 0.143038 |                     |

\*Residual imaginary frequency due to the twist motion of one of two methyl groups at the benzylic position.

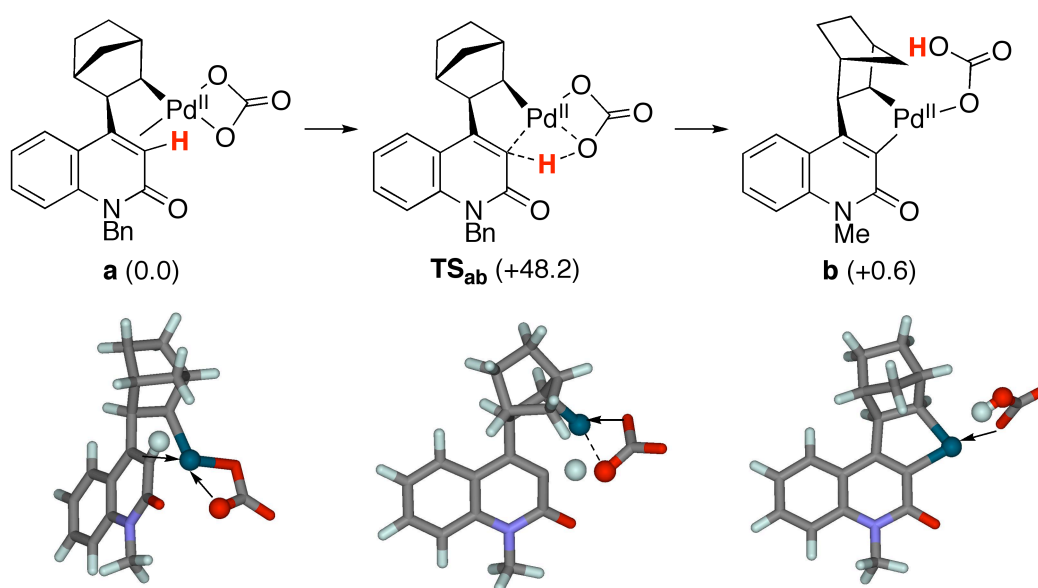

**Scheme S1** CMD step of model complex **a** leading to palladacycle complex **b**. Relative Gibbs free energies in DMF at 298 K, 1 atm are indicated in parentheses.

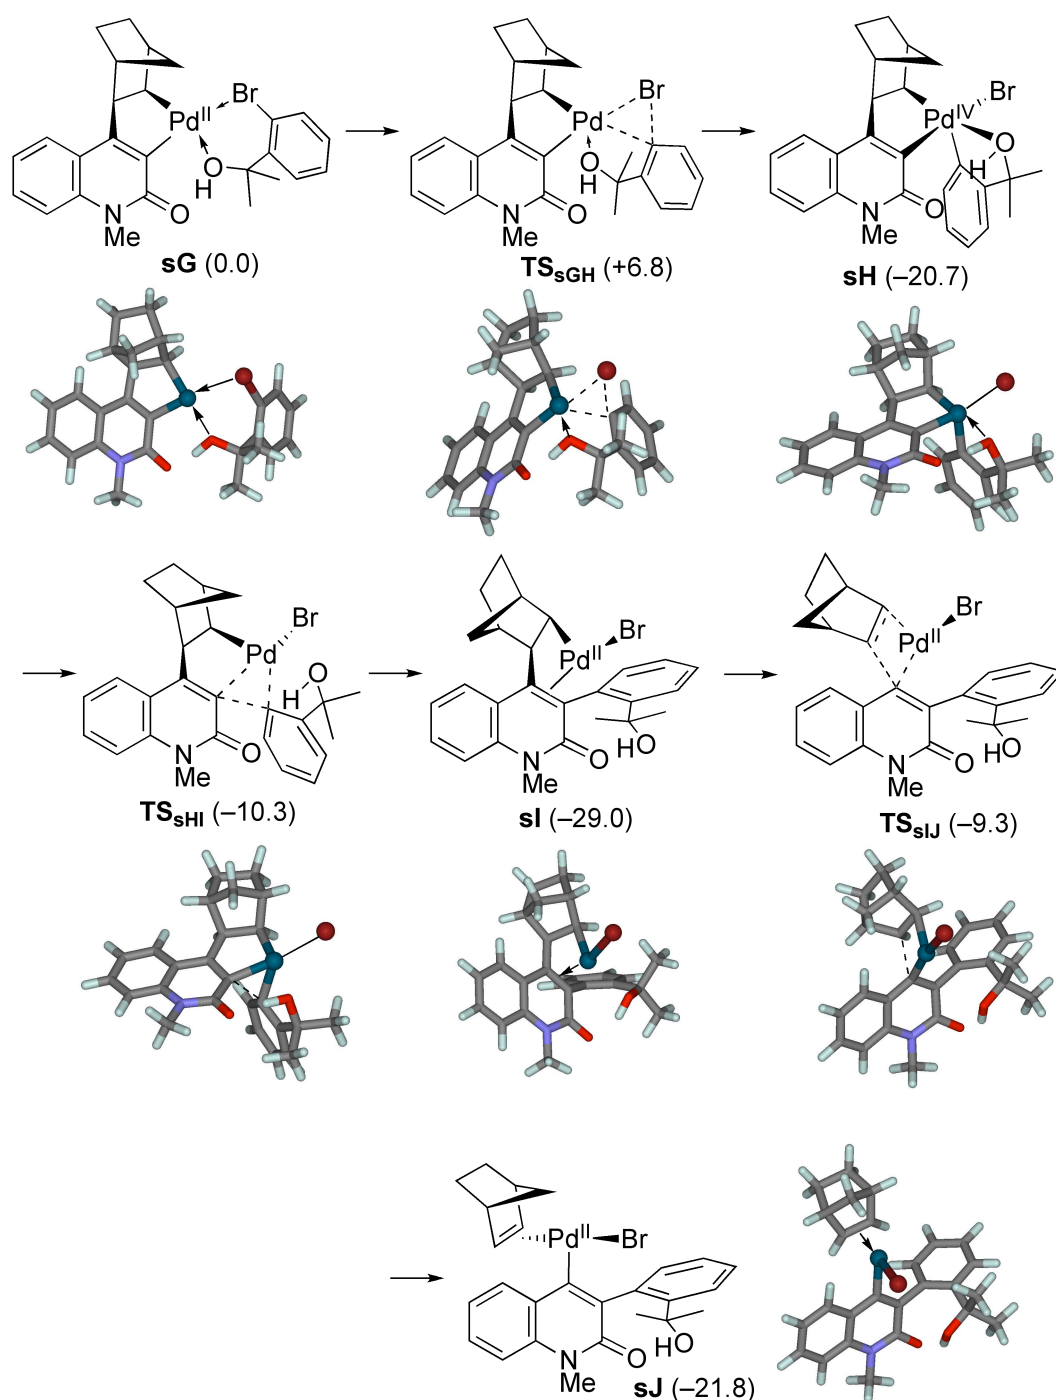

**Scheme S2** Oxidative addition/reductive elimination steps of model complex **sG** and subsequent deinsertion of NBE from intermediate complex **sI**. Relative Gibbs free energies in DMF at 298 K, 1 atm are indicated in parentheses.

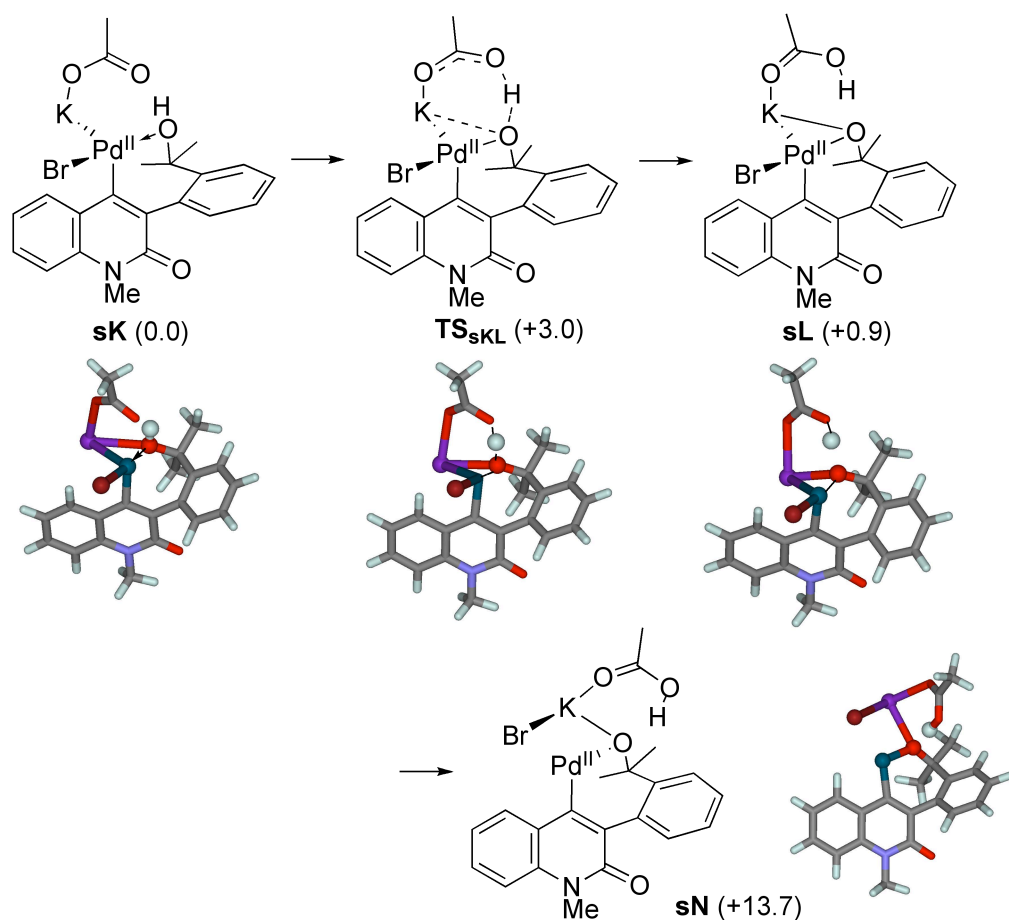

**Scheme S3** Deprotonation of benzylic alcohol of model complex **sK** and subsequent bromide dissociation from intermediate complex **sL**. Relative Gibbs free energies in DMF at 298 K, 1 atm are indicated in parentheses.

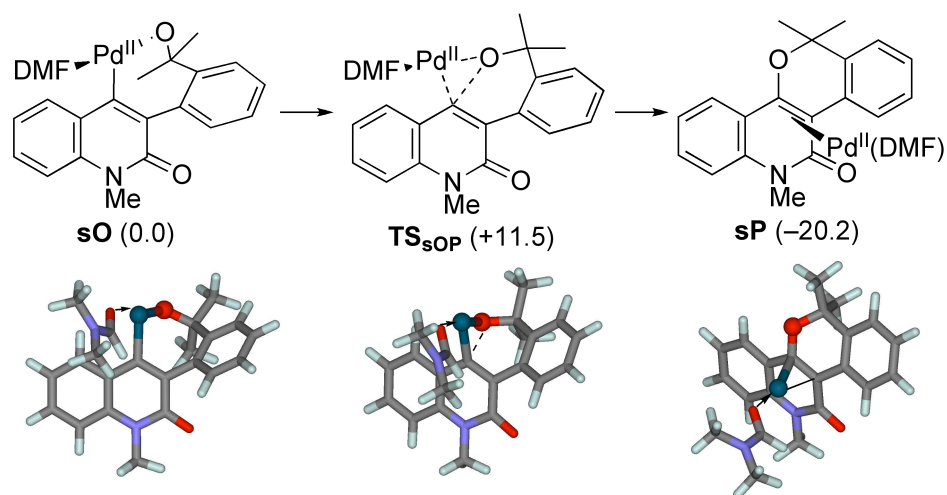

**Scheme S4** Reductive elimination from model complex **sO** affording the final product complex **sP**. Relative Gibbs free energies in DMF at 298 K, 1 atm are indicated in parentheses.

## Standard orientations

A

---

| Center Number | Atomic Number | Atomic Type | Coordinates (Angstroms) |           |           |
|---------------|---------------|-------------|-------------------------|-----------|-----------|
|               |               |             | X                       | Y         | Z         |
| 1             | 6             | 0           | 0.919466                | 0.092290  | -0.964743 |
| 2             | 6             | 0           | 0.865256                | -1.246274 | -1.560230 |
| 3             | 6             | 0           | 1.611929                | 0.302746  | 0.244330  |
| 4             | 6             | 0           | 0.182617                | -1.539225 | -2.751856 |
| 5             | 6             | 0           | 1.517888                | -2.305026 | -0.863569 |
| 6             | 6             | 0           | 2.280009                | -0.803272 | 0.948308  |
| 7             | 1             | 0           | 1.965227                | 1.283589  | 0.540469  |
| 8             | 6             | 0           | 0.127863                | -2.828353 | -3.264872 |
| 9             | 1             | 0           | -0.307926               | -0.726210 | -3.275881 |
| 10            | 6             | 0           | 1.453691                | -3.606532 | -1.397132 |
| 11            | 6             | 0           | 0.769513                | -3.863160 | -2.580361 |
| 12            | 1             | 0           | -0.406821               | -3.023726 | -4.189574 |
| 13            | 1             | 0           | 1.942585                | -4.426246 | -0.886298 |
| 14            | 1             | 0           | 0.741523                | -4.878141 | -2.967303 |
| 15            | 8             | 0           | 2.901392                | -0.636908 | 1.996204  |
| 16            | 7             | 0           | 2.206125                | -2.064075 | 0.331680  |
| 17            | 46            | 0           | -0.535838               | 0.298205  | 0.482570  |
| 18            | 53            | 0           | 0.750889                | 1.832966  | -2.320223 |
| 19            | 8             | 0           | -2.213404               | 0.440621  | 1.895252  |
| 20            | 6             | 0           | -2.136069               | 0.396996  | 3.131613  |
| 21            | 7             | 0           | -3.192224               | 0.504701  | 3.959319  |
| 22            | 6             | 0           | -4.539634               | 0.690430  | 3.434639  |
| 23            | 1             | 0           | -5.185694               | -0.137005 | 3.750878  |
| 24            | 1             | 0           | -4.963086               | 1.630415  | 3.807614  |
| 25            | 1             | 0           | -4.488184               | 0.719026  | 2.346729  |
| 26            | 6             | 0           | -3.032199               | 0.447561  | 5.404246  |
| 27            | 1             | 0           | -3.382735               | 1.377963  | 5.867171  |
| 28            | 1             | 0           | -3.607205               | -0.387603 | 5.822087  |
| 29            | 1             | 0           | -1.977951               | 0.307292  | 5.655353  |
| 30            | 1             | 0           | -1.175004               | 0.264371  | 3.646685  |
| 31            | 6             | 0           | 2.886424                | -3.162986 | 1.011367  |
| 32            | 1             | 0           | 2.170895                | -3.933883 | 1.320289  |
| 33            | 1             | 0           | 3.639470                | -3.616536 | 0.357965  |
| 34            | 1             | 0           | 3.370322                | -2.741525 | 1.890307  |

---

**TS<sub>AB</sub>**

---

| Center Number | Atomic Number | Atomic Type | Coordinates (Angstroms) |           |           |
|---------------|---------------|-------------|-------------------------|-----------|-----------|
|               |               |             | X                       | Y         | Z         |
| 1             | 6             | 0           | 2.014595                | -0.076452 | -0.747475 |
| 2             | 6             | 0           | 1.963876                | -1.326211 | -1.495346 |
| 3             | 6             | 0           | 2.926093                | 0.097366  | 0.280243  |
| 4             | 6             | 0           | 1.077296                | -1.562197 | -2.560588 |
| 5             | 6             | 0           | 2.844660                | -2.367911 | -1.082210 |
| 6             | 6             | 0           | 3.803799                | -0.980184 | 0.725574  |
| 7             | 1             | 0           | 3.123927                | 1.063577  | 0.726250  |
| 8             | 6             | 0           | 1.044885                | -2.781425 | -3.221016 |
| 9             | 1             | 0           | 0.419591                | -0.756238 | -2.866892 |
| 10            | 6             | 0           | 2.798953                | -3.601095 | -1.764579 |
| 11            | 6             | 0           | 1.913477                | -3.800666 | -2.816163 |
| 12            | 1             | 0           | 0.355672                | -2.937499 | -4.045298 |
| 13            | 1             | 0           | 3.459690                | -4.407457 | -1.472719 |
| 14            | 1             | 0           | 1.904883                | -4.760652 | -3.325296 |
| 15            | 8             | 0           | 4.581713                | -0.863839 | 1.671338  |
| 16            | 7             | 0           | 3.725431                | -2.177490 | -0.016981 |
| 17            | 46            | 0           | 0.455374                | 0.341148  | 0.420053  |
| 18            | 53            | 0           | 1.398939                | 1.903697  | -1.911590 |
| 19            | 8             | 0           | -1.294586               | 0.636430  | 1.768625  |
| 20            | 6             | 0           | -1.273499               | 0.606489  | 3.006262  |
| 21            | 7             | 0           | -2.357823               | 0.774011  | 3.787685  |
| 22            | 6             | 0           | -3.671293               | 1.013881  | 3.202523  |
| 23            | 1             | 0           | -4.366879               | 0.218679  | 3.495795  |
| 24            | 1             | 0           | -4.068686               | 1.975047  | 3.549309  |
| 25            | 1             | 0           | -3.570205               | 1.030046  | 2.117809  |
| 26            | 6             | 0           | -2.263265               | 0.726970  | 5.238407  |
| 27            | 1             | 0           | -2.593273               | 1.676626  | 5.676753  |
| 28            | 1             | 0           | -2.890690               | -0.078198 | 5.639651  |
| 29            | 1             | 0           | -1.227797               | 0.545165  | 5.536911  |
| 30            | 1             | 0           | -0.342924               | 0.436498  | 3.566662  |
| 31            | 6             | 0           | 4.622596                | -3.256318 | 0.388531  |
| 32            | 1             | 0           | 4.054027                | -4.132707 | 0.719983  |
| 33            | 1             | 0           | 5.277813                | -3.547422 | -0.439572 |
| 34            | 1             | 0           | 5.221390                | -2.877065 | 1.214449  |

---



**B**

---

| Center Number | Atomic Number | Atomic Type |           | Coordinates (Angstroms) |           |   |
|---------------|---------------|-------------|-----------|-------------------------|-----------|---|
|               |               |             |           | X                       | Y         | Z |
| 1             | 6             | 0           | 0.988298  | -1.245600               | 0.676459  |   |
| 2             | 6             | 0           | 0.956630  | -1.789990               | -0.662823 |   |
| 3             | 6             | 0           | 2.052909  | -1.451180               | 1.491074  |   |
| 4             | 6             | 0           | -0.090734 | -1.548942               | -1.572630 |   |
| 5             | 6             | 0           | 2.044845  | -2.620406               | -1.062328 |   |
| 6             | 6             | 0           | 3.171643  | -2.313591               | 1.111324  |   |
| 7             | 1             | 0           | 2.143530  | -0.998213               | 2.472737  |   |
| 8             | 6             | 0           | -0.088016 | -2.106470               | -2.841911 |   |
| 9             | 1             | 0           | -0.896940 | -0.892896               | -1.260235 |   |
| 10            | 6             | 0           | 2.030635  | -3.183908               | -2.354718 |   |
| 11            | 6             | 0           | 0.978852  | -2.928809               | -3.225259 |   |
| 12            | 1             | 0           | -0.901098 | -1.901779               | -3.531702 |   |
| 13            | 1             | 0           | 2.844814  | -3.818473               | -2.681520 |   |
| 14            | 1             | 0           | 0.995092  | -3.372966               | -4.216950 |   |
| 15            | 8             | 0           | 4.121563  | -2.547946               | 1.855161  |   |
| 16            | 7             | 0           | 3.097155  | -2.865410               | -0.184416 |   |
| 17            | 46            | 0           | -0.602591 | -0.531658               | 1.563791  |   |
| 18            | 53            | 0           | -0.084038 | 1.879400                | 0.592818  |   |
| 19            | 8             | 0           | -2.417451 | -0.160926               | 2.798945  |   |
| 20            | 6             | 0           | -2.887803 | 0.959479                | 3.062469  |   |
| 21            | 7             | 0           | -3.957871 | 1.158804                | 3.847996  |   |
| 22            | 6             | 0           | -4.660701 | 0.039748                | 4.464632  |   |
| 23            | 1             | 0           | -4.644460 | 0.140486                | 5.556066  |   |
| 24            | 1             | 0           | -5.703937 | 0.018454                | 4.128425  |   |
| 25            | 1             | 0           | -4.164443 | -0.885924               | 4.175315  |   |
| 26            | 6             | 0           | -4.459467 | 2.499416                | 4.115179  |   |
| 27            | 1             | 0           | -5.494600 | 2.597607                | 3.766995  |   |
| 28            | 1             | 0           | -4.431201 | 2.711227                | 5.190614  |   |
| 29            | 1             | 0           | -3.842380 | 3.235916                | 3.595412  |   |
| 30            | 1             | 0           | -2.440012 | 1.873627                | 2.651392  |   |
| 31            | 6             | 0           | 4.211628  | -3.716519               | -0.596942 |   |
| 32            | 1             | 0           | 3.859876  | -4.725778               | -0.836711 |   |
| 33            | 1             | 0           | 4.717293  | -3.294945               | -1.472324 |   |
| 34            | 1             | 0           | 4.904769  | -3.758932               | 0.241019  |   |

---

**C**

| Center Number | Atomic Number | Atomic Type | Coordinates (Angstroms) |           |           |
|---------------|---------------|-------------|-------------------------|-----------|-----------|
|               |               |             | X                       | Y         | Z         |
| 1             | 6             | 0           | -2.062091               | -2.365957 | 3.123496  |
| 2             | 6             | 0           | -0.868482               | -1.461334 | 2.659942  |
| 3             | 6             | 0           | -2.690269               | -0.226689 | 2.096849  |
| 4             | 6             | 0           | -3.316227               | -1.520056 | 2.732365  |
| 5             | 1             | 0           | -2.046967               | -3.352010 | 2.648328  |
| 6             | 1             | 0           | -2.005796               | -2.523410 | 4.205504  |
| 7             | 1             | 0           | -3.986361               | -2.042496 | 2.042545  |
| 8             | 1             | 0           | -3.905029               | -1.242407 | 3.612627  |
| 9             | 6             | 0           | -1.438320               | -0.063403 | 2.986635  |
| 10            | 1             | 0           | -0.792976               | 0.763515  | 2.673392  |
| 11            | 1             | 0           | -1.687196               | 0.053251  | 4.046512  |
| 12            | 6             | 0           | -0.960069               | -1.496407 | 1.141800  |
| 13            | 1             | 0           | -0.614987               | -2.348100 | 0.566026  |
| 14            | 6             | 0           | -2.091837               | -0.729583 | 0.794288  |
| 15            | 1             | 0           | -2.693974               | -0.887033 | -0.095934 |
| 16            | 1             | 0           | 0.100072                | -1.728084 | 3.084704  |
| 17            | 1             | 0           | -3.367602               | 0.622468  | 2.012989  |
| 18            | 6             | 0           | 1.287376                | -0.724899 | 0.172525  |
| 19            | 6             | 0           | 1.660927                | -1.574077 | -0.935215 |
| 20            | 6             | 0           | 2.169658                | -0.413191 | 1.150374  |
| 21            | 6             | 0           | 0.768317                | -1.955172 | -1.956480 |
| 22            | 6             | 0           | 3.012192                | -2.027862 | -0.989787 |
| 23            | 6             | 0           | 3.568315                | -0.847195 | 1.102448  |
| 24            | 1             | 0           | 1.912420                | 0.177525  | 2.023076  |
| 25            | 6             | 0           | 1.171440                | -2.769004 | -3.003689 |
| 26            | 1             | 0           | -0.251781               | -1.584130 | -1.912930 |
| 27            | 6             | 0           | 3.407089                | -2.852662 | -2.062997 |
| 28            | 6             | 0           | 2.498248                | -3.215568 | -3.048494 |
| 29            | 1             | 0           | 0.468204                | -3.050542 | -3.781146 |
| 30            | 1             | 0           | 4.426796                | -3.210804 | -2.127649 |
| 31            | 1             | 0           | 2.830336                | -3.852622 | -3.863501 |
| 32            | 8             | 0           | 4.387175                | -0.551331 | 1.967715  |
| 33            | 7             | 0           | 3.915662                | -1.654648 | 0.000166  |
| 34            | 46            | 0           | -0.369554               | 0.417332  | 0.071757  |
| 35            | 53            | 0           | -1.714645               | 2.596302  | -0.697950 |
| 36            | 6             | 0           | 5.305596                | -2.106279 | -0.067320 |
| 37            | 1             | 0           | 5.360962                | -3.199349 | -0.026286 |
| 38            | 1             | 0           | 5.779218                | -1.755482 | -0.989994 |
| 39            | 1             | 0           | 5.819713                | -1.682659 | 0.793179  |

---

**TS<sub>CD</sub>**

---

| Center Number | Atomic Number | Atomic Type |           | Coordinates (Angstroms) |           |   |
|---------------|---------------|-------------|-----------|-------------------------|-----------|---|
|               |               |             |           | X                       | Y         | Z |
| 1             | 6             | 0           | 1.064080  | 0.053192                | 0.786232  |   |
| 2             | 6             | 0           | 2.295785  | 0.920178                | 0.360058  |   |
| 3             | 6             | 0           | 0.523714  | 2.255011                | -0.131040 |   |
| 4             | 6             | 0           | -0.153819 | 0.973940                | 0.459716  |   |
| 5             | 1             | 0           | 1.028407  | -0.906903               | 0.260986  |   |
| 6             | 1             | 0           | 1.128037  | -0.164989               | 1.857084  |   |
| 7             | 1             | 0           | -0.861399 | 0.515091                | -0.238229 |   |
| 8             | 1             | 0           | -0.711624 | 1.237686                | 1.364241  |   |
| 9             | 6             | 0           | 1.795684  | 2.330961                | 0.742392  |   |
| 10            | 1             | 0           | 2.471458  | 3.139710                | 0.447984  |   |
| 11            | 1             | 0           | 1.571273  | 2.420817                | 1.810213  |   |
| 12            | 6             | 0           | 2.214482  | 0.945855                | -1.161645 |   |
| 13            | 1             | 0           | 2.389656  | 0.037649                | -1.729483 |   |
| 14            | 6             | 0           | 1.086590  | 1.795391                | -1.468628 |   |
| 15            | 1             | 0           | 0.416583  | 1.589331                | -2.301123 |   |
| 16            | 1             | 0           | 3.247484  | 0.586637                | 0.774503  |   |
| 17            | 1             | 0           | -0.113523 | 3.137990                | -0.173078 |   |
| 18            | 6             | 0           | 4.128987  | 1.587176                | -1.926069 |   |
| 19            | 6             | 0           | 4.558551  | 0.794481                | -3.063070 |   |
| 20            | 6             | 0           | 5.009153  | 1.929649                | -0.950755 |   |
| 21            | 6             | 0           | 3.688052  | 0.386670                | -4.093047 |   |
| 22            | 6             | 0           | 5.935090  | 0.431675                | -3.137096 |   |
| 23            | 6             | 0           | 6.430146  | 1.589249                | -1.018521 |   |
| 24            | 1             | 0           | 4.722716  | 2.479101                | -0.061707 |   |
| 25            | 6             | 0           | 4.137219  | -0.367358               | -5.166038 |   |
| 26            | 1             | 0           | 2.646918  | 0.691847                | -4.041861 |   |
| 27            | 6             | 0           | 6.376863  | -0.334832               | -4.235053 |   |
| 28            | 6             | 0           | 5.489307  | -0.726657               | -5.228454 |   |
| 29            | 1             | 0           | 3.449181  | -0.668764               | -5.949506 |   |
| 30            | 1             | 0           | 7.417196  | -0.624085               | -4.312777 |   |
| 31            | 1             | 0           | 5.857535  | -1.316920               | -6.062829 |   |
| 32            | 8             | 0           | 7.234111  | 1.921024                | -0.151753 |   |
| 33            | 7             | 0           | 6.820795  | 0.832919                | -2.141214 |   |
| 34            | 46            | 0           | 2.617096  | 2.960632                | -2.265274 |   |
| 35            | 53            | 0           | 1.290372  | 5.078860                | -3.154885 |   |

|    |   |   |          |           |           |
|----|---|---|----------|-----------|-----------|
| 36 | 6 | 0 | 8.235762 | 0.471199  | -2.227036 |
| 37 | 1 | 0 | 8.358434 | -0.617055 | -2.219481 |
| 38 | 1 | 0 | 8.682114 | 0.878328  | -3.140121 |
| 39 | 1 | 0 | 8.727000 | 0.900398  | -1.355996 |

**D**

| Center Number | Atomic Number | Atomic Type | Coordinates (Angstroms) |           |           |
|---------------|---------------|-------------|-------------------------|-----------|-----------|
|               |               |             | X                       | Y         | Z         |
| 1             | 6             | 0           | -2.349244               | -2.361252 | 2.748576  |
| 2             | 6             | 0           | -0.870690               | -1.901679 | 2.672451  |
| 3             | 6             | 0           | -2.006892               | -0.036349 | 2.035731  |
| 4             | 6             | 0           | -3.131124               | -1.107745 | 2.231954  |
| 5             | 1             | 0           | -2.541785               | -3.259501 | 2.151908  |
| 6             | 1             | 0           | -2.618624               | -2.594150 | 3.784141  |
| 7             | 1             | 0           | -3.684245               | -1.303058 | 1.307028  |
| 8             | 1             | 0           | -3.855330               | -0.749439 | 2.971325  |
| 9             | 6             | 0           | -1.027555               | -0.436778 | 3.156908  |
| 10            | 1             | 0           | -0.118598               | 0.166833  | 3.166329  |
| 11            | 1             | 0           | -1.482444               | -0.386836 | 4.152408  |
| 12            | 6             | 0           | -0.557456               | -1.782434 | 1.149216  |
| 13            | 1             | 0           | -0.992208               | -2.639618 | 0.628481  |
| 14            | 6             | 0           | -1.258523               | -0.457232 | 0.778804  |
| 15            | 1             | 0           | -1.824199               | -0.435133 | -0.153149 |
| 16            | 1             | 0           | -0.170208               | -2.534331 | 3.224686  |
| 17            | 1             | 0           | -2.364097               | 0.993361  | 2.026430  |
| 18            | 6             | 0           | 0.900022                | -1.614950 | 0.696866  |
| 19            | 6             | 0           | 1.382024                | -2.197479 | -0.554927 |
| 20            | 6             | 0           | 1.799277                | -0.924697 | 1.493790  |
| 21            | 6             | 0           | 0.544974                | -2.897233 | -1.446844 |
| 22            | 6             | 0           | 2.761291                | -2.055420 | -0.888642 |
| 23            | 6             | 0           | 3.222965                | -0.782094 | 1.165277  |
| 24            | 1             | 0           | 1.566811                | -0.641235 | 2.510864  |
| 25            | 6             | 0           | 1.030571                | -3.456249 | -2.618946 |
| 26            | 1             | 0           | -0.511687               | -2.990167 | -1.225076 |
| 27            | 6             | 0           | 3.241613                | -2.632198 | -2.080180 |
| 28            | 6             | 0           | 2.387504                | -3.322151 | -2.930000 |
| 29            | 1             | 0           | 0.360546                | -3.987230 | -3.287652 |
| 30            | 1             | 0           | 4.286049                | -2.537437 | -2.346739 |
| 31            | 1             | 0           | 2.784289                | -3.754591 | -3.844039 |

|    |    |   |           |           |           |
|----|----|---|-----------|-----------|-----------|
| 32 | 8  | 0 | 4.011875  | -0.210943 | 1.911459  |
| 33 | 7  | 0 | 3.628004  | -1.352472 | -0.050212 |
| 34 | 46 | 0 | 0.433878  | 0.643947  | 0.347875  |
| 35 | 53 | 0 | -0.796040 | 2.763606  | -0.610509 |
| 36 | 6  | 0 | 5.041609  | -1.209479 | -0.402660 |
| 37 | 1  | 0 | 5.523928  | -2.189952 | -0.473354 |
| 38 | 1  | 0 | 5.147067  | -0.683611 | -1.356934 |
| 39 | 1  | 0 | 5.510111  | -0.629651 | 0.389962  |

**E**

| Center Number | Atomic Number | Atomic Type | Coordinates (Angstroms) |           |           |
|---------------|---------------|-------------|-------------------------|-----------|-----------|
|               |               |             | X                       | Y         | Z         |
| 1             | 6             | 0           | -3.667608               | -2.428525 | 1.630709  |
| 2             | 6             | 0           | -2.121739               | -2.359926 | 1.516690  |
| 3             | 6             | 0           | -2.745278               | -0.227711 | 1.030666  |
| 4             | 6             | 0           | -4.109180               | -0.983432 | 1.221219  |
| 5             | 1             | 0           | -4.110249               | -3.203509 | 0.994302  |
| 6             | 1             | 0           | -3.958115               | -2.649993 | 2.662728  |
| 7             | 1             | 0           | -4.732017               | -0.967134 | 0.319808  |
| 8             | 1             | 0           | -4.680263               | -0.492418 | 2.016274  |
| 9             | 6             | 0           | -1.872697               | -0.940925 | 2.082549  |
| 10            | 1             | 0           | -0.835553               | -0.609322 | 2.137581  |
| 11            | 1             | 0           | -2.295066               | -0.842974 | 3.089879  |
| 12            | 6             | 0           | -1.842319               | -2.230164 | -0.012720 |
| 13            | 1             | 0           | -2.514499               | -2.902360 | -0.547818 |
| 14            | 6             | 0           | -2.208927               | -0.758915 | -0.285572 |
| 15            | 1             | 0           | -2.802224               | -0.547561 | -1.179937 |
| 16            | 1             | 0           | -1.590317               | -3.183903 | 2.000045  |
| 17            | 1             | 0           | -2.826768               | 0.858096  | 1.089218  |
| 18            | 6             | 0           | -0.421358               | -2.410216 | -0.571069 |
| 19            | 6             | 0           | -0.171827               | -3.241108 | -1.749898 |
| 20            | 6             | 0           | 0.661700                | -1.792359 | 0.050498  |
| 21            | 6             | 0           | -1.191106               | -3.923250 | -2.446675 |
| 22            | 6             | 0           | 1.171705                | -3.419052 | -2.194026 |
| 23            | 6             | 0           | 2.012492                | -1.830780 | -0.534614 |
| 24            | 1             | 0           | 0.645898                | -1.382003 | 1.063113  |
| 25            | 6             | 0           | -0.917266               | -4.762491 | -3.515820 |
| 26            | 1             | 0           | -2.223894               | -3.793075 | -2.148257 |
| 27            | 6             | 0           | 1.438575                | -4.279357 | -3.275135 |

|    |    |   |           |           |           |
|----|----|---|-----------|-----------|-----------|
| 28 | 6  | 0 | 0.407006  | -4.943048 | -3.925246 |
| 29 | 1  | 0 | -1.727666 | -5.271900 | -4.027584 |
| 30 | 1  | 0 | 2.455015  | -4.425397 | -3.616295 |
| 31 | 1  | 0 | 0.639003  | -5.599148 | -4.759136 |
| 32 | 8  | 0 | 2.918515  | -1.090293 | -0.134408 |
| 33 | 7  | 0 | 2.218277  | -2.722184 | -1.582492 |
| 34 | 46 | 0 | -0.382729 | -0.056178 | -0.952701 |
| 35 | 19 | 0 | 2.420050  | 1.407547  | 0.998171  |
| 36 | 8  | 0 | 2.963109  | 0.792465  | 3.491990  |
| 37 | 6  | 0 | 1.999414  | -0.012357 | 3.547764  |
| 38 | 8  | 0 | 1.113601  | -0.157845 | 2.638424  |
| 39 | 53 | 0 | -0.617382 | 2.540494  | -1.447450 |
| 40 | 6  | 0 | 1.851446  | -0.897421 | 4.792193  |
| 41 | 1  | 0 | 0.892120  | -0.688796 | 5.280724  |
| 42 | 1  | 0 | 1.837291  | -1.953640 | 4.497862  |
| 43 | 1  | 0 | 2.665261  | -0.725117 | 5.500276  |
| 44 | 6  | 0 | 3.583511  | -2.840005 | -2.100824 |
| 45 | 1  | 0 | 3.925353  | -3.877315 | -2.037143 |
| 46 | 1  | 0 | 3.631763  | -2.504499 | -3.141937 |
| 47 | 1  | 0 | 4.217669  | -2.205740 | -1.485742 |

-----

**TS<sub>EF</sub>**

-----

| Center Number | Atomic Number | Atomic Type | Coordinates (Angstroms) |          |           |
|---------------|---------------|-------------|-------------------------|----------|-----------|
|               |               |             | X                       | Y        | Z         |
| 1             | 6             | 0           | 0.554381                | 0.736902 | -0.019335 |
| 2             | 6             | 0           | 2.097371                | 0.644558 | 0.069580  |
| 3             | 6             | 0           | 1.720309                | 2.881882 | 0.212373  |
| 4             | 6             | 0           | 0.290533                | 2.278398 | 0.038972  |
| 5             | 1             | 0           | 0.155885                | 0.272800 | -0.929067 |
| 6             | 1             | 0           | 0.094139                | 0.225565 | 0.833341  |
| 7             | 1             | 0           | -0.214675               | 2.657055 | -0.856064 |
| 8             | 1             | 0           | -0.332395               | 2.545024 | 0.900041  |
| 9             | 6             | 0           | 2.403520                | 1.789198 | 1.062798  |
| 10            | 1             | 0           | 3.464366                | 1.971842 | 1.242277  |
| 11            | 1             | 0           | 1.906455                | 1.635346 | 2.028320  |
| 12            | 6             | 0           | 2.663061                | 1.199469 | -1.278606 |
| 13            | 1             | 0           | 2.061365                | 0.813462 | -2.111936 |
| 14            | 6             | 0           | 2.415295                | 2.734199 | -1.144304 |
| 15            | 1             | 0           | 1.865291                | 3.167750 | -1.987937 |

|    |    |   |          |           |           |
|----|----|---|----------|-----------|-----------|
| 16 | 1  | 0 | 2.476184 | -0.346801 | 0.335289  |
| 17 | 1  | 0 | 1.721946 | 3.898037  | 0.611250  |
| 18 | 6  | 0 | 4.111021 | 0.928142  | -1.599986 |
| 19 | 6  | 0 | 4.548765 | -0.262401 | -2.288701 |
| 20 | 6  | 0 | 5.017899 | 1.929098  | -1.295404 |
| 21 | 6  | 0 | 3.689172 | -1.352056 | -2.552210 |
| 22 | 6  | 0 | 5.908238 | -0.348398 | -2.711895 |
| 23 | 6  | 0 | 6.392085 | 1.868744  | -1.800688 |
| 24 | 1  | 0 | 5.155157 | 2.371555  | -0.031992 |
| 25 | 6  | 0 | 4.138337 | -2.493007 | -3.194500 |
| 26 | 1  | 0 | 2.654605 | -1.290190 | -2.231951 |
| 27 | 6  | 0 | 6.350224 | -1.512101 | -3.371565 |
| 28 | 6  | 0 | 5.476867 | -2.565799 | -3.604376 |
| 29 | 1  | 0 | 3.460600 | -3.320295 | -3.380812 |
| 30 | 1  | 0 | 7.377759 | -1.596729 | -3.701226 |
| 31 | 1  | 0 | 5.842796 | -3.453362 | -4.112838 |
| 32 | 8  | 0 | 7.192050 | 2.804857  | -1.629822 |
| 33 | 7  | 0 | 6.782474 | 0.713999  | -2.483260 |
| 34 | 46 | 0 | 4.123915 | 3.831501  | -1.343789 |
| 35 | 19 | 0 | 7.020809 | 4.917516  | 0.182812  |
| 36 | 8  | 0 | 7.717740 | 2.950862  | 1.948983  |
| 37 | 6  | 0 | 6.751110 | 2.253476  | 1.620550  |
| 38 | 8  | 0 | 5.654343 | 2.772304  | 1.120198  |
| 39 | 53 | 0 | 4.022230 | 6.559048  | -1.411085 |
| 40 | 6  | 0 | 6.766959 | 0.744385  | 1.808778  |
| 41 | 1  | 0 | 6.039323 | 0.468826  | 2.581066  |
| 42 | 1  | 0 | 6.461864 | 0.236620  | 0.886745  |
| 43 | 1  | 0 | 7.759463 | 0.404374  | 2.110016  |
| 44 | 6  | 0 | 8.155828 | 0.655746  | -2.988831 |
| 45 | 1  | 0 | 8.702963 | -0.171152 | -2.524480 |
| 46 | 1  | 0 | 8.158307 | 0.527242  | -4.075795 |
| 47 | 1  | 0 | 8.632387 | 1.598597  | -2.730384 |

**F**

| Center Number | Atomic Number | Atomic Type | Coordinates (Angstroms) |           |          |
|---------------|---------------|-------------|-------------------------|-----------|----------|
|               |               |             | X                       | Y         | Z        |
| 1             | 6             | 0           | -4.167163               | -2.316256 | 0.813537 |
| 2             | 6             | 0           | -2.632667               | -2.512543 | 0.824629 |
| 3             | 6             | 0           | -2.863177               | -0.325419 | 1.388033 |

|    |    |   |           |           |           |
|----|----|---|-----------|-----------|-----------|
| 4  | 6  | 0 | -4.330525 | -0.802587 | 1.170744  |
| 5  | 1  | 0 | -4.611506 | -2.574103 | -0.154744 |
| 6  | 1  | 0 | -4.641142 | -2.953282 | 1.569056  |
| 7  | 1  | 0 | -4.834989 | -0.231845 | 0.383741  |
| 8  | 1  | 0 | -4.912442 | -0.670723 | 2.090354  |
| 9  | 6  | 0 | -2.223611 | -1.591736 | 1.994153  |
| 10 | 1  | 0 | -1.140130 | -1.504386 | 2.119529  |
| 11 | 1  | 0 | -2.672693 | -1.894608 | 2.947645  |
| 12 | 6  | 0 | -2.055246 | -1.759765 | -0.421064 |
| 13 | 1  | 0 | -2.685657 | -1.976371 | -1.296571 |
| 14 | 6  | 0 | -2.195425 | -0.257116 | 0.006807  |
| 15 | 1  | 0 | -2.753733 | 0.350207  | -0.715970 |
| 16 | 1  | 0 | -2.315342 | -3.556380 | 0.900524  |
| 17 | 1  | 0 | -2.788809 | 0.596415  | 1.969981  |
| 18 | 6  | 0 | -0.619514 | -2.034033 | -0.762133 |
| 19 | 6  | 0 | -0.141316 | -3.278259 | -1.324953 |
| 20 | 6  | 0 | 0.237987  | -0.984414 | -0.553508 |
| 21 | 6  | 0 | -0.986684 | -4.373473 | -1.601413 |
| 22 | 6  | 0 | 1.242217  | -3.396059 | -1.634686 |
| 23 | 6  | 0 | 1.654692  | -1.106872 | -0.854177 |
| 24 | 1  | 0 | 0.766838  | 0.314416  | 2.204901  |
| 25 | 6  | 0 | -0.497723 | -5.548916 | -2.149922 |
| 26 | 1  | 0 | -2.044979 | -4.283016 | -1.380953 |
| 27 | 6  | 0 | 1.729340  | -4.596201 | -2.187915 |
| 28 | 6  | 0 | 0.868464  | -5.657139 | -2.438991 |
| 29 | 1  | 0 | -1.169531 | -6.377313 | -2.354575 |
| 30 | 1  | 0 | 2.779893  | -4.703564 | -2.427300 |
| 31 | 1  | 0 | 1.265648  | -6.573231 | -2.867176 |
| 32 | 8  | 0 | 2.472308  | -0.180893 | -0.641266 |
| 33 | 7  | 0 | 2.099909  | -2.319275 | -1.387060 |
| 34 | 46 | 0 | -0.435796 | 0.788542  | 0.037644  |
| 35 | 19 | 0 | 3.038496  | 2.036238  | 0.654631  |
| 36 | 8  | 0 | 3.749091  | -0.072696 | 2.598746  |
| 37 | 6  | 0 | 2.574258  | -0.380729 | 2.621719  |
| 38 | 8  | 0 | 1.654811  | 0.609490  | 2.517860  |
| 39 | 53 | 0 | -0.186318 | 3.525234  | 0.583372  |
| 40 | 6  | 0 | 2.047323  | -1.784338 | 2.788007  |
| 41 | 1  | 0 | 1.455285  | -1.853774 | 3.707671  |
| 42 | 1  | 0 | 1.391302  | -2.045796 | 1.950143  |
| 43 | 1  | 0 | 2.881909  | -2.484415 | 2.837010  |
| 44 | 6  | 0 | 3.522527  | -2.443302 | -1.706064 |
| 45 | 1  | 0 | 3.976404  | -3.259607 | -1.134377 |
| 46 | 1  | 0 | 3.661603  | -2.633801 | -2.775337 |



|    |   |   |          |           |           |
|----|---|---|----------|-----------|-----------|
| 47 | 1 | 0 | 3.997474 | -1.502789 | -1.438139 |
|----|---|---|----------|-----------|-----------|

---

## G

---

| Center Number | Atomic Number | Atomic Type | Coordinates (Angstroms) |           |           |
|---------------|---------------|-------------|-------------------------|-----------|-----------|
|               |               |             | X                       | Y         | Z         |
| 1             | 6             | 0           | -3.050451               | -2.453386 | 2.858778  |
| 2             | 6             | 0           | -1.545351               | -2.463667 | 2.501386  |
| 3             | 6             | 0           | -2.056156               | -0.257886 | 2.457586  |
| 4             | 6             | 0           | -3.416134               | -0.933724 | 2.798338  |
| 5             | 1             | 0           | -3.647275               | -3.060919 | 2.168156  |
| 6             | 1             | 0           | -3.208355               | -2.856352 | 3.866020  |
| 7             | 1             | 0           | -4.183168               | -0.712346 | 2.047560  |
| 8             | 1             | 0           | -3.794906               | -0.578103 | 3.764348  |
| 9             | 6             | 0           | -1.062916               | -1.175577 | 3.200890  |
| 10            | 1             | 0           | -0.017667               | -0.927562 | 2.994568  |
| 11            | 1             | 0           | -1.221218               | -1.203070 | 4.286204  |
| 12            | 6             | 0           | -1.421724               | -2.097797 | 0.983241  |
| 13            | 1             | 0           | -2.190206               | -2.650377 | 0.421622  |
| 14            | 6             | 0           | -1.720331               | -0.556793 | 0.981496  |
| 15            | 1             | 0           | -2.541124               | -0.293975 | 0.301492  |
| 16            | 1             | 0           | -1.027039               | -3.385230 | 2.780775  |
| 17            | 1             | 0           | -2.027150               | 0.803856  | 2.723477  |
| 18            | 6             | 0           | -0.081203               | -2.350884 | 0.357706  |
| 19            | 6             | 0           | 0.413968                | -3.681282 | 0.070877  |
| 20            | 6             | 0           | 0.652485                | -1.239717 | 0.025804  |
| 21            | 6             | 0           | -0.318934               | -4.852714 | 0.357720  |
| 22            | 6             | 0           | 1.689751                | -3.816379 | -0.539351 |
| 23            | 6             | 0           | 1.945465                | -1.378864 | -0.629288 |
| 24            | 6             | 0           | 0.181587                | -6.112890 | 0.069265  |
| 25            | 1             | 0           | -1.298275               | -4.756652 | 0.813676  |
| 26            | 6             | 0           | 2.192683                | -5.101380 | -0.824098 |
| 27            | 6             | 0           | 1.446118                | -6.232500 | -0.521031 |
| 28            | 1             | 0           | -0.403069               | -6.998784 | 0.299674  |
| 29            | 1             | 0           | 3.164020                | -5.220403 | -1.287317 |
| 30            | 1             | 0           | 1.851807                | -7.213978 | -0.750661 |
| 31            | 8             | 0           | 2.653151                | -0.411468 | -1.004698 |
| 32            | 7             | 0           | 2.421348                | -2.671606 | -0.858218 |
| 33            | 46            | 0           | -0.131650               | 0.561912  | 0.366734  |
| 34            | 6             | 0           | 3.736446                | -2.810669 | -1.486604 |

|    |    |   |           |           |           |
|----|----|---|-----------|-----------|-----------|
| 35 | 1  | 0 | 4.406116  | -3.390110 | -0.842922 |
| 36 | 1  | 0 | 3.648735  | -3.311247 | -2.456902 |
| 37 | 1  | 0 | 4.136962  | -1.810364 | -1.628479 |
| 38 | 35 | 0 | -1.338760 | 3.160825  | 0.141885  |
| 39 | 6  | 0 | -0.695356 | 3.163175  | -1.740565 |
| 40 | 6  | 0 | -1.661703 | 3.236825  | -2.735295 |
| 41 | 6  | 0 | 0.674823  | 3.072683  | -2.002188 |
| 42 | 6  | 0 | -1.249572 | 3.223944  | -4.070358 |
| 43 | 6  | 0 | 1.050046  | 3.058831  | -3.353524 |
| 44 | 6  | 0 | 0.107215  | 3.133593  | -4.378837 |
| 45 | 1  | 0 | -1.993343 | 3.281096  | -4.859858 |
| 46 | 1  | 0 | 2.107547  | 2.985744  | -3.595263 |
| 47 | 1  | 0 | 0.432605  | 3.118840  | -5.414932 |
| 48 | 6  | 0 | 1.729994  | 3.012560  | -0.913887 |
| 49 | 1  | 0 | 2.719901  | 3.133096  | -1.370704 |
| 50 | 1  | 0 | 1.582597  | 3.843890  | -0.216571 |
| 51 | 1  | 0 | -2.713083 | 3.301290  | -2.478091 |
| 52 | 8  | 0 | 1.708547  | 1.826765  | -0.127474 |
| 53 | 1  | 0 | 2.168824  | 1.053781  | -0.580368 |

TS<sub>GH</sub>

| Center Number | Atomic Number | Atomic Type | Coordinates (Angstroms) |           |           |
|---------------|---------------|-------------|-------------------------|-----------|-----------|
|               |               |             | X                       | Y         | Z         |
| 1             | 6             | 0           | -3.690517               | -2.297742 | 1.183567  |
| 2             | 6             | 0           | -2.174920               | -2.392064 | 0.891868  |
| 3             | 6             | 0           | -2.507181               | -0.159680 | 1.093279  |
| 4             | 6             | 0           | -3.929808               | -0.757620 | 1.299066  |
| 5             | 1             | 0           | -4.295569               | -2.763720 | 0.396959  |
| 6             | 1             | 0           | -3.932315               | -2.806591 | 2.123660  |
| 7             | 1             | 0           | -4.645264               | -0.380935 | 0.559771  |
| 8             | 1             | 0           | -4.315150               | -0.487448 | 2.289239  |
| 9             | 6             | 0           | -1.625038               | -1.238559 | 1.755422  |
| 10            | 1             | 0           | -0.552757               | -1.063252 | 1.622263  |
| 11            | 1             | 0           | -1.834193               | -1.374051 | 2.823211  |
| 12            | 6             | 0           | -1.940610               | -1.863356 | -0.566083 |
| 13            | 1             | 0           | -2.705082               | -2.289482 | -1.232282 |
| 14            | 6             | 0           | -2.147161               | -0.318942 | -0.397137 |
| 15            | 1             | 0           | -2.918006               | 0.080765  | -1.062435 |
| 16            | 1             | 0           | -1.743351               | -3.378949 | 1.078054  |

|    |    |   |           |           |           |
|----|----|---|-----------|-----------|-----------|
| 17 | 1  | 0 | -2.408991 | 0.858603  | 1.475064  |
| 18 | 6  | 0 | -0.578051 | -2.147054 | -1.125438 |
| 19 | 6  | 0 | -0.161802 | -3.481922 | -1.506406 |
| 20 | 6  | 0 | 0.263088  | -1.074651 | -1.280017 |
| 21 | 6  | 0 | -1.009361 | -4.606727 | -1.415656 |
| 22 | 6  | 0 | 1.152065  | -3.665695 | -2.013312 |
| 23 | 6  | 0 | 1.605207  | -1.264170 | -1.814171 |
| 24 | 6  | 0 | -0.584242 | -5.869889 | -1.795767 |
| 25 | 1  | 0 | -2.018477 | -4.472944 | -1.042098 |
| 26 | 6  | 0 | 1.577818  | -4.954640 | -2.391710 |
| 27 | 6  | 0 | 0.718632  | -6.039583 | -2.281384 |
| 28 | 1  | 0 | -1.256493 | -6.719164 | -1.717465 |
| 29 | 1  | 0 | 2.577087  | -5.110989 | -2.777580 |
| 30 | 1  | 0 | 1.066167  | -7.024510 | -2.580615 |
| 31 | 8  | 0 | 2.424890  | -0.334611 | -2.000165 |
| 32 | 7  | 0 | 1.998856  | -2.565009 | -2.136255 |
| 33 | 46 | 0 | -0.457540 | 0.769700  | -0.841114 |
| 34 | 6  | 0 | 3.359019  | -2.755868 | -2.646192 |
| 35 | 1  | 0 | 3.909863  | -3.452647 | -2.006464 |
| 36 | 1  | 0 | 3.334364  | -3.147726 | -3.668508 |
| 37 | 1  | 0 | 3.848532  | -1.785644 | -2.639984 |
| 38 | 35 | 0 | -1.641354 | 3.161600  | -0.697789 |
| 39 | 6  | 0 | -1.032076 | 2.065544  | -2.638033 |
| 40 | 6  | 0 | -2.126678 | 1.706396  | -3.416020 |
| 41 | 6  | 0 | 0.192580  | 2.473509  | -3.181988 |
| 42 | 6  | 0 | -1.972171 | 1.682887  | -4.805511 |
| 43 | 6  | 0 | 0.311865  | 2.430592  | -4.575607 |
| 44 | 6  | 0 | -0.756760 | 2.044925  | -5.387891 |
| 45 | 1  | 0 | -2.814125 | 1.387300  | -5.425883 |
| 46 | 1  | 0 | 1.265797  | 2.702045  | -5.022659 |
| 47 | 1  | 0 | -0.640199 | 2.029126  | -6.467434 |
| 48 | 6  | 0 | 1.335673  | 2.877601  | -2.281079 |
| 49 | 1  | 0 | 2.265401  | 2.962473  | -2.856675 |
| 50 | 1  | 0 | 1.129144  | 3.850782  | -1.823857 |
| 51 | 1  | 0 | -3.075005 | 1.450797  | -2.958422 |
| 52 | 8  | 0 | 1.505334  | 1.957401  | -1.198422 |
| 53 | 1  | 0 | 1.974469  | 1.134643  | -1.533692 |

---

**H**

---

| Center Number | Atomic Number | Atomic Type | Coordinates (Angstroms) |   |   |
|---------------|---------------|-------------|-------------------------|---|---|
|               |               |             | X                       | Y | Z |

---

|    |    |   |           |           |           |
|----|----|---|-----------|-----------|-----------|
| 1  | 6  | 0 | -3.174281 | -2.038877 | 2.461118  |
| 2  | 6  | 0 | -1.670505 | -2.182263 | 2.131923  |
| 3  | 6  | 0 | -1.880979 | 0.037143  | 2.537080  |
| 4  | 6  | 0 | -3.328141 | -0.508684 | 2.728854  |
| 5  | 1  | 0 | -3.813745 | -2.395081 | 1.645090  |
| 6  | 1  | 0 | -3.427493 | -2.625371 | 3.351227  |
| 7  | 1  | 0 | -4.044405 | -0.023394 | 2.058285  |
| 8  | 1  | 0 | -3.659950 | -0.312880 | 3.754626  |
| 9  | 6  | 0 | -1.041997 | -1.139851 | 3.076176  |
| 10 | 1  | 0 | 0.037610  | -1.016219 | 2.935255  |
| 11 | 1  | 0 | -1.233090 | -1.354789 | 4.133425  |
| 12 | 6  | 0 | -1.428149 | -1.537763 | 0.718615  |
| 13 | 1  | 0 | -2.199748 | -1.886425 | 0.018127  |
| 14 | 6  | 0 | -1.596057 | -0.013055 | 1.024914  |
| 15 | 1  | 0 | -2.354226 | 0.495631  | 0.429327  |
| 16 | 1  | 0 | -1.286342 | -3.201365 | 2.215039  |
| 17 | 1  | 0 | -1.727882 | 1.016294  | 2.988504  |
| 18 | 6  | 0 | -0.063013 | -1.842376 | 0.165407  |
| 19 | 6  | 0 | 0.304991  | -3.177659 | -0.263050 |
| 20 | 6  | 0 | 0.835904  | -0.814435 | 0.087247  |
| 21 | 6  | 0 | -0.602121 | -4.259120 | -0.276547 |
| 22 | 6  | 0 | 1.632059  | -3.402311 | -0.716832 |
| 23 | 6  | 0 | 2.189237  | -1.034886 | -0.404362 |
| 24 | 6  | 0 | -0.221722 | -5.520405 | -0.705378 |
| 25 | 1  | 0 | -1.622180 | -4.094614 | 0.051722  |
| 26 | 6  | 0 | 2.011835  | -4.690914 | -1.143009 |
| 27 | 6  | 0 | 1.095020  | -5.732699 | -1.133866 |
| 28 | 1  | 0 | -0.939087 | -6.335394 | -0.708910 |
| 29 | 1  | 0 | 3.019777  | -4.878737 | -1.489761 |
| 30 | 1  | 0 | 1.407601  | -6.717400 | -1.469639 |
| 31 | 8  | 0 | 3.049691  | -0.137408 | -0.526472 |
| 32 | 7  | 0 | 2.537891  | -2.343758 | -0.743567 |
| 33 | 46 | 0 | 0.138365  | 1.032033  | 0.620513  |
| 34 | 6  | 0 | 3.914561  | -2.581219 | -1.189029 |
| 35 | 1  | 0 | 4.386510  | -3.344189 | -0.562724 |
| 36 | 1  | 0 | 3.929295  | -2.909350 | -2.233525 |
| 37 | 1  | 0 | 4.454527  | -1.642642 | -1.097014 |
| 38 | 35 | 0 | -0.891165 | 3.279474  | 1.432840  |
| 39 | 6  | 0 | -0.131581 | 1.322214  | -1.357379 |
| 40 | 6  | 0 | -1.087000 | 0.693070  | -2.143635 |
| 41 | 6  | 0 | 0.761260  | 2.267862  | -1.875235 |
| 42 | 6  | 0 | -1.182222 | 1.039405  | -3.496830 |

|    |   |   |           |           |           |
|----|---|---|-----------|-----------|-----------|
| 43 | 6 | 0 | 0.653591  | 2.585337  | -3.235665 |
| 44 | 6 | 0 | -0.312655 | 1.983755  | -4.041594 |
| 45 | 1 | 0 | -1.934203 | 0.559797  | -4.117737 |
| 46 | 1 | 0 | 1.337938  | 3.317207  | -3.660027 |
| 47 | 1 | 0 | -0.379898 | 2.245674  | -5.093763 |
| 48 | 6 | 0 | 1.762498  | 2.959465  | -0.975593 |
| 49 | 1 | 0 | 2.682651  | 3.201775  | -1.521961 |
| 50 | 1 | 0 | 1.330876  | 3.886897  | -0.587701 |
| 51 | 1 | 0 | -1.757040 | -0.050651 | -1.729651 |
| 52 | 8 | 0 | 2.072513  | 2.170122  | 0.179228  |
| 53 | 1 | 0 | 2.589802  | 1.363994  | -0.111343 |

-----

**TS<sub>HI</sub>**

-----

| Center Number | Atomic Number | Atomic Type | Coordinates (Angstroms) |           |           |
|---------------|---------------|-------------|-------------------------|-----------|-----------|
|               |               |             | X                       | Y         | Z         |
| 1             | 6             | 0           | -3.123017               | -2.105514 | 2.400610  |
| 2             | 6             | 0           | -1.612909               | -2.105091 | 2.073761  |
| 3             | 6             | 0           | -1.998057               | 0.062067  | 2.593567  |
| 4             | 6             | 0           | -3.404423               | -0.601628 | 2.704375  |
| 5             | 1             | 0           | -3.731849               | -2.498937 | 1.577903  |
| 6             | 1             | 0           | -3.318842               | -2.732258 | 3.277963  |
| 7             | 1             | 0           | -4.125895               | -0.153650 | 2.012760  |
| 8             | 1             | 0           | -3.800147               | -0.464472 | 3.716930  |
| 9             | 6             | 0           | -1.080753               | -1.074081 | 3.084166  |
| 10            | 1             | 0           | -0.014271               | -0.851394 | 2.971850  |
| 11            | 1             | 0           | -1.270250               | -1.369042 | 4.122496  |
| 12            | 6             | 0           | -1.443968               | -1.363484 | 0.688071  |
| 13            | 1             | 0           | -2.248727               | -1.699432 | 0.017743  |
| 14            | 6             | 0           | -1.641605               | 0.133495  | 1.100947  |
| 15            | 1             | 0           | -2.380338               | 0.670129  | 0.501224  |
| 16            | 1             | 0           | -1.144815               | -3.090435 | 2.102293  |
| 17            | 1             | 0           | -1.928070               | 1.017447  | 3.107883  |
| 18            | 6             | 0           | -0.107277               | -1.639052 | 0.045560  |
| 19            | 6             | 0           | 0.261660                | -2.988439 | -0.323264 |
| 20            | 6             | 0           | 0.760756                | -0.592230 | -0.212222 |
| 21            | 6             | 0           | -0.653433               | -4.067632 | -0.295375 |
| 22            | 6             | 0           | 1.577927                | -3.242035 | -0.793551 |
| 23            | 6             | 0           | 2.155813                | -0.873988 | -0.574837 |
| 24            | 6             | 0           | -0.290235               | -5.339728 | -0.703458 |

|    |    |   |           |           |           |
|----|----|---|-----------|-----------|-----------|
| 25 | 1  | 0 | -1.668696 | -3.889352 | 0.037612  |
| 26 | 6  | 0 | 1.942543  | -4.542127 | -1.193475 |
| 27 | 6  | 0 | 1.018075  | -5.575700 | -1.146520 |
| 28 | 1  | 0 | -1.015949 | -6.146850 | -0.679821 |
| 29 | 1  | 0 | 2.943717  | -4.744474 | -1.551398 |
| 30 | 1  | 0 | 1.316549  | -6.570628 | -1.464078 |
| 31 | 8  | 0 | 3.046508  | -0.005246 | -0.643787 |
| 32 | 7  | 0 | 2.495341  | -2.196424 | -0.841914 |
| 33 | 46 | 0 | 0.110594  | 1.159279  | 0.760732  |
| 34 | 6  | 0 | 3.891553  | -2.474648 | -1.197515 |
| 35 | 1  | 0 | 4.303224  | -3.234747 | -0.527442 |
| 36 | 1  | 0 | 3.960449  | -2.825714 | -2.232201 |
| 37 | 1  | 0 | 4.448877  | -1.548020 | -1.092072 |
| 38 | 35 | 0 | -0.625885 | 3.215692  | 2.106880  |
| 39 | 6  | 0 | 0.104778  | 0.869049  | -1.344293 |
| 40 | 6  | 0 | -0.912542 | 0.322224  | -2.146251 |
| 41 | 6  | 0 | 0.898865  | 1.918715  | -1.862978 |
| 42 | 6  | 0 | -1.120414 | 0.767434  | -3.447121 |
| 43 | 6  | 0 | 0.688287  | 2.329755  | -3.187500 |
| 44 | 6  | 0 | -0.302462 | 1.765221  | -3.982888 |
| 45 | 1  | 0 | -1.908926 | 0.318820  | -4.045084 |
| 46 | 1  | 0 | 1.300034  | 3.139591  | -3.580640 |
| 47 | 1  | 0 | -0.443563 | 2.105321  | -5.004796 |
| 48 | 6  | 0 | 1.847203  | 2.754584  | -1.018422 |
| 49 | 1  | 0 | 2.798644  | 2.908313  | -1.544415 |
| 50 | 1  | 0 | 1.392204  | 3.735622  | -0.846556 |
| 51 | 1  | 0 | -1.530140 | -0.481192 | -1.765834 |
| 52 | 8  | 0 | 2.088334  | 2.207584  | 0.274500  |
| 53 | 1  | 0 | 2.640654  | 1.398268  | 0.102622  |

I

| Center Number | Atomic Number | Atomic Type | Coordinates (Angstroms) |           |          |
|---------------|---------------|-------------|-------------------------|-----------|----------|
|               |               |             | X                       | Y         | Z        |
| 1             | 6             | 0           | -3.726060               | -1.134625 | 1.040196 |
| 2             | 6             | 0           | -2.426145               | -1.981410 | 0.953893 |
| 3             | 6             | 0           | -1.844393               | -0.265269 | 2.323843 |
| 4             | 6             | 0           | -3.330580               | 0.048244  | 1.977445 |
| 5             | 1             | 0           | -4.070032               | -0.803120 | 0.054149 |
| 6             | 1             | 0           | -4.530024               | -1.735958 | 1.477898 |

|    |    |   |           |           |           |
|----|----|---|-----------|-----------|-----------|
| 7  | 1  | 0 | -3.453173 | 1.028315  | 1.504143  |
| 8  | 1  | 0 | -3.929793 | 0.054364  | 2.894892  |
| 9  | 6  | 0 | -1.864855 | -1.805937 | 2.385788  |
| 10 | 1  | 0 | -0.869698 | -2.229123 | 2.545654  |
| 11 | 1  | 0 | -2.542431 | -2.190899 | 3.156194  |
| 12 | 6  | 0 | -1.438724 | -1.163017 | 0.078198  |
| 13 | 1  | 0 | -1.962650 | -0.815939 | -0.815725 |
| 14 | 6  | 0 | -1.078801 | 0.005465  | 1.035120  |
| 15 | 1  | 0 | -1.183143 | 1.014816  | 0.630053  |
| 16 | 1  | 0 | -2.631670 | -2.992089 | 0.598970  |
| 17 | 1  | 0 | -1.458995 | 0.258047  | 3.196746  |
| 18 | 6  | 0 | -0.030073 | -1.654656 | -0.374116 |
| 19 | 6  | 0 | 0.544589  | -2.998137 | -0.196763 |
| 20 | 6  | 0 | 0.679723  | -0.711987 | -1.171317 |
| 21 | 6  | 0 | -0.090316 | -4.038026 | 0.515230  |
| 22 | 6  | 0 | 1.807573  | -3.298370 | -0.785670 |
| 23 | 6  | 0 | 2.015109  | -1.052064 | -1.731384 |
| 24 | 6  | 0 | 0.461932  | -5.303856 | 0.639551  |
| 25 | 1  | 0 | -1.032516 | -3.850885 | 0.998147  |
| 26 | 6  | 0 | 2.359545  | -4.586350 | -0.656831 |
| 27 | 6  | 0 | 1.694890  | -5.580063 | 0.046628  |
| 28 | 1  | 0 | -0.066245 | -6.068328 | 1.200914  |
| 29 | 1  | 0 | 3.315830  | -4.814282 | -1.107892 |
| 30 | 1  | 0 | 2.143028  | -6.565594 | 0.133034  |
| 31 | 8  | 0 | 2.667441  | -0.236567 | -2.397988 |
| 32 | 7  | 0 | 2.515958  | -2.317960 | -1.486508 |
| 33 | 46 | 0 | 0.964174  | -0.194460 | 1.024223  |
| 34 | 6  | 0 | 3.845326  | -2.621490 | -2.027717 |
| 35 | 1  | 0 | 4.515562  | -2.935408 | -1.222284 |
| 36 | 1  | 0 | 3.782602  | -3.414045 | -2.780193 |
| 37 | 1  | 0 | 4.222300  | -1.712668 | -2.489243 |
| 38 | 35 | 0 | 1.478353  | 0.608885  | 3.352413  |
| 39 | 6  | 0 | 0.009283  | 0.408488  | -1.937219 |
| 40 | 6  | 0 | -0.897322 | -0.007895 | -2.930180 |
| 41 | 6  | 0 | 0.290690  | 1.787213  | -1.812131 |
| 42 | 6  | 0 | -1.556107 | 0.897466  | -3.757007 |
| 43 | 6  | 0 | -0.379453 | 2.683749  | -2.659125 |
| 44 | 6  | 0 | -1.300746 | 2.260423  | -3.612865 |
| 45 | 1  | 0 | -2.250381 | 0.538560  | -4.511615 |
| 46 | 1  | 0 | -0.158001 | 3.744775  | -2.568715 |
| 47 | 1  | 0 | -1.797774 | 2.986640  | -4.250057 |
| 48 | 6  | 0 | 1.249106  | 2.408937  | -0.799926 |
| 49 | 1  | 0 | 1.564127  | 3.387259  | -1.193419 |

|    |   |   |           |           |           |
|----|---|---|-----------|-----------|-----------|
| 50 | 1 | 0 | 0.726155  | 2.604294  | 0.144834  |
| 51 | 1 | 0 | -1.079201 | -1.072980 | -3.055061 |
| 52 | 8 | 0 | 2.384482  | 1.634635  | -0.455345 |
| 53 | 1 | 0 | 2.708503  | 1.200289  | -1.272340 |

TS<sub>1J</sub>

| Center Number | Atomic Number | Atomic Type | Coordinates (Angstroms) |           |           |
|---------------|---------------|-------------|-------------------------|-----------|-----------|
|               |               |             | X                       | Y         | Z         |
| 1             | 6             | 0           | -3.811738               | -1.804687 | 0.624842  |
| 2             | 6             | 0           | -2.320711               | -2.146058 | 0.963758  |
| 3             | 6             | 0           | -2.708040               | -0.252338 | 2.160703  |
| 4             | 6             | 0           | -4.074526               | -0.496258 | 1.437730  |
| 5             | 1             | 0           | -3.979250               | -1.682451 | -0.450323 |
| 6             | 1             | 0           | -4.455915               | -2.622792 | 0.963033  |
| 7             | 1             | 0           | -4.368474               | 0.346935  | 0.804568  |
| 8             | 1             | 0           | -4.865302               | -0.638254 | 2.181762  |
| 9             | 6             | 0           | -2.274076               | -1.704522 | 2.444616  |
| 10            | 1             | 0           | -1.288694               | -1.760913 | 2.915085  |
| 11            | 1             | 0           | -2.995224               | -2.250522 | 3.062101  |
| 12            | 6             | 0           | -1.546325               | -1.044769 | 0.238911  |
| 13            | 1             | 0           | -1.673029               | -0.964328 | -0.832100 |
| 14            | 6             | 0           | -1.757575               | 0.149717  | 1.042931  |
| 15            | 1             | 0           | -1.852979               | 1.129087  | 0.576361  |
| 16            | 1             | 0           | -2.032024               | -3.170127 | 0.725291  |
| 17            | 1             | 0           | -2.745281               | 0.434844  | 3.005568  |
| 18            | 6             | 0           | 0.466358                | -1.383921 | -0.238335 |
| 19            | 6             | 0           | 1.007692                | -2.697858 | 0.072486  |
| 20            | 6             | 0           | 0.825639                | -0.736628 | -1.392182 |
| 21            | 6             | 0           | 0.715094                | -3.400300 | 1.259792  |
| 22            | 6             | 0           | 1.906283                | -3.296802 | -0.856814 |
| 23            | 6             | 0           | 1.840392                | -1.312935 | -2.291928 |
| 24            | 6             | 0           | 1.244181                | -4.654592 | 1.519460  |
| 25            | 1             | 0           | 0.069258                | -2.932713 | 1.990089  |
| 26            | 6             | 0           | 2.428573                | -4.577993 | -0.588477 |
| 27            | 6             | 0           | 2.097854                | -5.246418 | 0.581634  |
| 28            | 1             | 0           | 1.000458                | -5.166786 | 2.445023  |
| 29            | 1             | 0           | 3.105827                | -5.046681 | -1.290693 |
| 30            | 1             | 0           | 2.518190                | -6.230541 | 0.768228  |
| 31            | 8             | 0           | 2.281863                | -0.691417 | -3.264380 |



|    |    |   |           |           |           |
|----|----|---|-----------|-----------|-----------|
| 32 | 7  | 0 | 2.280405  | -2.605568 | -2.004776 |
| 33 | 46 | 0 | 0.255300  | -0.103736 | 1.411971  |
| 34 | 6  | 0 | 3.248659  | -3.194955 | -2.932292 |
| 35 | 1  | 0 | 4.199770  | -3.383987 | -2.424172 |
| 36 | 1  | 0 | 2.862746  | -4.134288 | -3.340862 |
| 37 | 1  | 0 | 3.401571  | -2.477604 | -3.735235 |
| 38 | 35 | 0 | 0.635784  | 1.432823  | 3.363145  |
| 39 | 6  | 0 | 0.221967  | 0.545957  | -1.885141 |
| 40 | 6  | 0 | -0.906329 | 0.454099  | -2.715386 |
| 41 | 6  | 0 | 0.765667  | 1.817735  | -1.604639 |
| 42 | 6  | 0 | -1.542939 | 1.592700  | -3.208617 |
| 43 | 6  | 0 | 0.117613  | 2.951292  | -2.112925 |
| 44 | 6  | 0 | -1.034753 | 2.851696  | -2.891755 |
| 45 | 1  | 0 | -2.417472 | 1.493237  | -3.845681 |
| 46 | 1  | 0 | 0.538726  | 3.931465  | -1.902121 |
| 47 | 1  | 0 | -1.514071 | 3.750150  | -3.270735 |
| 48 | 6  | 0 | 2.040792  | 2.001463  | -0.799370 |
| 49 | 1  | 0 | 2.399451  | 3.032648  | -0.945817 |
| 50 | 1  | 0 | 1.838505  | 1.889732  | 0.274476  |
| 51 | 1  | 0 | -1.279630 | -0.529820 | -2.992234 |
| 52 | 8  | 0 | 3.059119  | 1.062825  | -1.104879 |
| 53 | 1  | 0 | 3.037600  | 0.882567  | -2.062171 |

**J**

| Center Number | Atomic Number | Atomic Type | Coordinates (Angstroms) |           |           |
|---------------|---------------|-------------|-------------------------|-----------|-----------|
|               |               |             | X                       | Y         | Z         |
| 1             | 6             | 0           | -4.642080               | -1.881985 | 1.397242  |
| 2             | 6             | 0           | -3.253064               | -1.410098 | 1.953596  |
| 3             | 6             | 0           | -3.751953               | 0.172223  | 0.402480  |
| 4             | 6             | 0           | -4.985335               | -0.791909 | 0.332419  |
| 5             | 1             | 0           | -4.595732               | -2.891163 | 0.976912  |
| 6             | 1             | 0           | -5.378458               | -1.896621 | 2.207626  |
| 7             | 1             | 0           | -5.126949               | -1.205789 | -0.670548 |
| 8             | 1             | 0           | -5.899063               | -0.249068 | 0.596753  |
| 9             | 6             | 0           | -3.452580               | 0.123821  | 1.919055  |
| 10            | 1             | 0           | -2.566875               | 0.703815  | 2.224248  |
| 11            | 1             | 0           | -4.292778               | 0.460102  | 2.535781  |
| 12            | 6             | 0           | -2.288323               | -1.612843 | 0.792587  |
| 13            | 1             | 0           | -1.785855               | -2.552794 | 0.589952  |

|    |    |   |           |           |           |
|----|----|---|-----------|-----------|-----------|
| 14 | 6  | 0 | -2.589729 | -0.641182 | -0.153694 |
| 15 | 1  | 0 | -2.369934 | -0.721896 | -1.210812 |
| 16 | 1  | 0 | -2.964913 | -1.859081 | 2.905614  |
| 17 | 1  | 0 | -3.906325 | 1.153999  | -0.047623 |
| 18 | 6  | 0 | 0.522238  | -0.792580 | -0.517050 |
| 19 | 6  | 0 | 1.088254  | -2.103977 | -0.309551 |
| 20 | 6  | 0 | 0.742018  | -0.071122 | -1.644571 |
| 21 | 6  | 0 | 0.997579  | -2.816300 | 0.903829  |
| 22 | 6  | 0 | 1.796723  | -2.692363 | -1.396136 |
| 23 | 6  | 0 | 1.500980  | -0.675367 | -2.759555 |
| 24 | 6  | 0 | 1.548513  | -4.080031 | 1.046172  |
| 25 | 1  | 0 | 0.507234  | -2.335741 | 1.743989  |
| 26 | 6  | 0 | 2.340943  | -3.983408 | -1.241279 |
| 27 | 6  | 0 | 2.212885  | -4.665037 | -0.038908 |
| 28 | 1  | 0 | 1.473700  | -4.603965 | 1.994074  |
| 29 | 1  | 0 | 2.876263  | -4.449853 | -2.058443 |
| 30 | 1  | 0 | 2.647840  | -5.656001 | 0.056857  |
| 31 | 8  | 0 | 1.713404  | -0.066700 | -3.811619 |
| 32 | 7  | 0 | 1.948277  | -1.988169 | -2.585048 |
| 33 | 46 | 0 | -0.674403 | -0.041613 | 0.893189  |
| 34 | 6  | 0 | 2.681355  | -2.588808 | -3.700806 |
| 35 | 1  | 0 | 3.717727  | -2.794832 | -3.413699 |
| 36 | 1  | 0 | 2.200304  | -3.520220 | -4.015954 |
| 37 | 1  | 0 | 2.667013  | -1.870413 | -4.517267 |
| 38 | 35 | 0 | 1.167686  | 1.020724  | 2.219637  |
| 39 | 6  | 0 | 0.252113  | 1.324371  | -1.889054 |
| 40 | 6  | 0 | -1.030658 | 1.519652  | -2.418589 |
| 41 | 6  | 0 | 1.077177  | 2.447680  | -1.653559 |
| 42 | 6  | 0 | -1.533302 | 2.798620  | -2.659951 |
| 43 | 6  | 0 | 0.556380  | 3.723812  | -1.900354 |
| 44 | 6  | 0 | -0.739127 | 3.909597  | -2.382913 |
| 45 | 1  | 0 | -2.530622 | 2.921153  | -3.074147 |
| 46 | 1  | 0 | 1.189896  | 4.588827  | -1.718683 |
| 47 | 1  | 0 | -1.113103 | 4.913576  | -2.565019 |
| 48 | 6  | 0 | 2.509751  | 2.321340  | -1.167397 |
| 49 | 1  | 0 | 2.971585  | 3.321204  | -1.190616 |
| 50 | 1  | 0 | 2.528002  | 1.977948  | -0.127763 |
| 51 | 1  | 0 | -1.633621 | 0.652783  | -2.671625 |
| 52 | 8  | 0 | 3.296623  | 1.392110  | -1.903772 |
| 53 | 1  | 0 | 2.989025  | 1.388232  | -2.826424 |

---

**K**

| Center Number | Atomic Number | Atomic Type | Coordinates (Angstroms) |           |           |
|---------------|---------------|-------------|-------------------------|-----------|-----------|
|               |               |             | X                       | Y         | Z         |
| 1             | 6             | 0           | -0.373471               | -0.809389 | -0.494223 |
| 2             | 6             | 0           | -0.075318               | -2.212304 | -0.266110 |
| 3             | 6             | 0           | -1.501809               | -0.457104 | -1.180218 |
| 4             | 6             | 0           | 1.087227                | -2.649576 | 0.407701  |
| 5             | 6             | 0           | -1.004588               | -3.196139 | -0.714061 |
| 6             | 6             | 0           | -2.428273               | -1.460256 | -1.725412 |
| 7             | 6             | 0           | 1.314534                | -3.992101 | 0.683529  |
| 8             | 1             | 0           | 1.844675                | -1.904759 | 0.636427  |
| 9             | 6             | 0           | -0.765201               | -4.556718 | -0.423130 |
| 10            | 6             | 0           | 0.371391                | -4.944415 | 0.273745  |
| 11            | 1             | 0           | 2.231529                | -4.301836 | 1.177335  |
| 12            | 1             | 0           | -1.467447               | -5.313967 | -0.748735 |
| 13            | 1             | 0           | 0.534154                | -5.999218 | 0.478261  |
| 14            | 8             | 0           | -3.430263               | -1.171084 | -2.378394 |
| 15            | 7             | 0           | -2.127630               | -2.807047 | -1.431093 |
| 16            | 46            | 0           | 0.600344                | 0.674776  | 0.398213  |
| 17            | 6             | 0           | -3.058122               | -3.813572 | -1.940667 |
| 18            | 1             | 0           | -2.542076               | -4.513057 | -2.606545 |
| 19            | 1             | 0           | -3.515895               | -4.373432 | -1.117384 |
| 20            | 1             | 0           | -3.829668               | -3.281628 | -2.493634 |
| 21            | 35            | 0           | 2.686334                | 0.288776  | -0.930080 |
| 22            | 6             | 0           | -1.875051               | 0.972669  | -1.421533 |
| 23            | 6             | 0           | -1.820893               | 1.491181  | -2.721582 |
| 24            | 6             | 0           | -2.287007               | 1.820577  | -0.368799 |
| 25            | 6             | 0           | -2.133908               | 2.825080  | -2.977507 |
| 26            | 6             | 0           | -2.602409               | 3.158910  | -0.638834 |
| 27            | 6             | 0           | -2.522670               | 3.666623  | -1.933701 |
| 28            | 1             | 0           | -2.074893               | 3.206550  | -3.993109 |
| 29            | 1             | 0           | -2.921217               | 3.804839  | 0.176821  |
| 30            | 1             | 0           | -2.767268               | 4.707143  | -2.127385 |
| 31            | 6             | 0           | -2.426635               | 1.302166  | 1.037280  |
| 32            | 1             | 0           | -3.037292               | 1.977232  | 1.645800  |
| 33            | 1             | 0           | -2.884074               | 0.310737  | 1.050958  |
| 34            | 1             | 0           | -1.525520               | 0.836510  | -3.535062 |
| 35            | 8             | 0           | -1.151335               | 1.112016  | 1.732081  |
| 36            | 1             | 0           | -0.688333               | 1.974176  | 1.881541  |
| 37            | 6             | 0           | 1.821279                | 2.245410  | 2.741174  |
| 38            | 8             | 0           | 1.174686                | 2.424559  | 1.635647  |
| 39            | 8             | 0           | 1.767210                | 1.215740  | 3.447027  |

|    |    |   |          |           |          |
|----|----|---|----------|-----------|----------|
| 40 | 6  | 0 | 2.706346 | 3.408548  | 3.166636 |
| 41 | 1  | 0 | 2.177886 | 4.358553  | 3.042180 |
| 42 | 1  | 0 | 3.040425 | 3.289747  | 4.199718 |
| 43 | 1  | 0 | 3.581511 | 3.439120  | 2.506815 |
| 44 | 19 | 0 | 0.419126 | -0.917035 | 3.138017 |

-----

**TS<sub>KL</sub>**

-----

| Center Number | Atomic Number | Atomic Type | Coordinates (Angstroms) |           |           |
|---------------|---------------|-------------|-------------------------|-----------|-----------|
|               |               |             | X                       | Y         | Z         |
| 1             | 6             | 0           | 1.924317                | -0.500265 | -1.288308 |
| 2             | 6             | 0           | 2.251275                | -1.883790 | -1.020186 |
| 3             | 6             | 0           | 0.782181                | -0.151869 | -1.943643 |
| 4             | 6             | 0           | 3.429720                | -2.289063 | -0.355507 |
| 5             | 6             | 0           | 1.321747                | -2.883861 | -1.430482 |
| 6             | 6             | 0           | -0.141835               | -1.181797 | -2.450151 |
| 7             | 6             | 0           | 3.675372                | -3.622654 | -0.054562 |
| 8             | 1             | 0           | 4.176939                | -1.528338 | -0.145603 |
| 9             | 6             | 0           | 1.583993                | -4.234823 | -1.116420 |
| 10            | 6             | 0           | 2.737142                | -4.593752 | -0.431127 |
| 11            | 1             | 0           | 4.601840                | -3.911600 | 0.433635  |
| 12            | 1             | 0           | 0.886118                | -5.007142 | -1.414546 |
| 13            | 1             | 0           | 2.916257                | -5.642019 | -0.208151 |
| 14            | 8             | 0           | -1.156131               | -0.919276 | -3.091701 |
| 15            | 7             | 0           | 0.181747                | -2.519093 | -2.132443 |
| 16            | 46            | 0           | 2.966333                | 0.985429  | -0.526911 |
| 17            | 6             | 0           | -0.748146               | -3.546586 | -2.601723 |
| 18            | 1             | 0           | -0.238449               | -4.252144 | -3.265912 |
| 19            | 1             | 0           | -1.179737               | -4.094996 | -1.757135 |
| 20            | 1             | 0           | -1.538732               | -3.035382 | -3.147103 |
| 21            | 35            | 0           | 4.993647                | 0.655636  | -1.938229 |
| 22            | 6             | 0           | 0.399520                | 1.272977  | -2.186920 |
| 23            | 6             | 0           | 0.342719                | 1.756860  | -3.500237 |
| 24            | 6             | 0           | 0.106479                | 2.149126  | -1.117727 |
| 25            | 6             | 0           | 0.033675                | 3.091301  | -3.759241 |
| 26            | 6             | 0           | -0.202490               | 3.486548  | -1.393455 |
| 27            | 6             | 0           | -0.234734               | 3.963043  | -2.703266 |
| 28            | 1             | 0           | 0.004508                | 3.448327  | -4.784970 |
| 29            | 1             | 0           | -0.423999               | 4.158830  | -0.567563 |
| 30            | 1             | 0           | -0.471940               | 5.005378  | -2.897352 |

|    |    |   |           |           |           |
|----|----|---|-----------|-----------|-----------|
| 31 | 6  | 0 | 0.063156  | 1.658267  | 0.311932  |
| 32 | 1  | 0 | -0.394972 | 2.420225  | 0.953512  |
| 33 | 1  | 0 | -0.550556 | 0.752229  | 0.376851  |
| 34 | 1  | 0 | 0.546483  | 1.076957  | -4.320971 |
| 35 | 8  | 0 | 1.346962  | 1.316449  | 0.877797  |
| 36 | 1  | 0 | 1.992985  | 2.175098  | 1.206621  |
| 37 | 6  | 0 | 3.841498  | 2.615214  | 2.342127  |
| 38 | 8  | 0 | 3.080217  | 2.923638  | 1.331031  |
| 39 | 8  | 0 | 3.658077  | 1.634733  | 3.087707  |
| 40 | 6  | 0 | 5.019411  | 3.548621  | 2.557991  |
| 41 | 1  | 0 | 4.664830  | 4.580391  | 2.650561  |
| 42 | 1  | 0 | 5.580688  | 3.263978  | 3.449931  |
| 43 | 1  | 0 | 5.675363  | 3.512972  | 1.680947  |
| 44 | 19 | 0 | 2.549643  | -0.577110 | 2.383786  |

**L**

| Center Number | Atomic Number | Atomic Type | Coordinates (Angstroms) |           |           |
|---------------|---------------|-------------|-------------------------|-----------|-----------|
|               |               |             | X                       | Y         | Z         |
| 1             | 6             | 0           | -0.324643               | -0.876786 | -0.909562 |
| 2             | 6             | 0           | -0.021769               | -2.252947 | -0.574364 |
| 3             | 6             | 0           | -1.548699               | -0.510767 | -1.382509 |
| 4             | 6             | 0           | 1.243848                | -2.680874 | -0.114961 |
| 5             | 6             | 0           | -1.060860               | -3.221193 | -0.703787 |
| 6             | 6             | 0           | -2.600111               | -1.521929 | -1.608785 |
| 7             | 6             | 0           | 1.477453                | -3.997660 | 0.260950  |
| 8             | 1             | 0           | 2.052988                | -1.955343 | -0.121808 |
| 9             | 6             | 0           | -0.810205               | -4.554753 | -0.314358 |
| 10            | 6             | 0           | 0.435952                | -4.931592 | 0.169045  |
| 11            | 1             | 0           | 2.466689                | -4.304969 | 0.587906  |
| 12            | 1             | 0           | -1.590909               | -5.300376 | -0.397382 |
| 13            | 1             | 0           | 0.602877                | -5.966505 | 0.454871  |
| 14            | 8             | 0           | -3.700376               | -1.254741 | -2.084114 |
| 15            | 7             | 0           | -2.293718               | -2.842868 | -1.213649 |
| 16            | 46            | 0           | 0.978722                | 0.569308  | -0.584725 |
| 17            | 6             | 0           | -3.347224               | -3.841825 | -1.396141 |
| 18            | 1             | 0           | -3.011290               | -4.636950 | -2.069756 |
| 19            | 1             | 0           | -3.635214               | -4.282165 | -0.435117 |
| 20            | 1             | 0           | -4.200875               | -3.328012 | -1.833042 |
| 21            | 35            | 0           | 2.687518                | -0.031600 | -2.302481 |

|    |    |   |           |           |           |
|----|----|---|-----------|-----------|-----------|
| 22 | 6  | 0 | -1.905114 | 0.904780  | -1.694744 |
| 23 | 6  | 0 | -2.268714 | 1.258005  | -3.001086 |
| 24 | 6  | 0 | -1.875005 | 1.898328  | -0.692501 |
| 25 | 6  | 0 | -2.566263 | 2.580339  | -3.326364 |
| 26 | 6  | 0 | -2.179621 | 3.220876  | -1.034210 |
| 27 | 6  | 0 | -2.518063 | 3.568222  | -2.341739 |
| 28 | 1  | 0 | -2.835682 | 2.836783  | -4.347263 |
| 29 | 1  | 0 | -2.156437 | 3.984305  | -0.259564 |
| 30 | 1  | 0 | -2.748385 | 4.601208  | -2.588371 |
| 31 | 6  | 0 | -1.560542 | 1.544766  | 0.745764  |
| 32 | 1  | 0 | -1.835302 | 2.394064  | 1.388638  |
| 33 | 1  | 0 | -2.199465 | 0.696949  | 1.047648  |
| 34 | 1  | 0 | -2.314507 | 0.487582  | -3.763445 |
| 35 | 8  | 0 | -0.195801 | 1.221611  | 1.004332  |
| 36 | 1  | 0 | 0.485714  | 2.254932  | 1.870971  |
| 37 | 6  | 0 | 1.451272  | 2.409189  | 3.569464  |
| 38 | 8  | 0 | 0.938124  | 2.960463  | 2.489062  |
| 39 | 8  | 0 | 1.403600  | 1.203658  | 3.826581  |
| 40 | 6  | 0 | 2.131410  | 3.408904  | 4.476953  |
| 41 | 1  | 0 | 1.456381  | 4.242898  | 4.692417  |
| 42 | 1  | 0 | 2.443845  | 2.925359  | 5.403393  |
| 43 | 1  | 0 | 3.006942  | 3.825801  | 3.966774  |
| 44 | 19 | 0 | 0.594235  | -0.852766 | 2.451780  |

**M**

| Center Number | Atomic Number | Atomic Type | Coordinates (Angstroms) |           |           |
|---------------|---------------|-------------|-------------------------|-----------|-----------|
|               |               |             | X                       | Y         | Z         |
| 1             | 6             | 0           | -0.433591               | -1.237413 | -0.651856 |
| 2             | 6             | 0           | -0.248190               | -2.671358 | -0.565852 |
| 3             | 6             | 0           | -1.557861               | -0.679833 | -1.180368 |
| 4             | 6             | 0           | 0.903357                | -3.280510 | -0.022907 |
| 5             | 6             | 0           | -1.286585               | -3.508027 | -1.065670 |
| 6             | 6             | 0           | -2.620410               | -1.548417 | -1.738651 |
| 7             | 6             | 0           | 1.033202                | -4.659030 | 0.049006  |
| 8             | 1             | 0           | 1.714363                | -2.643614 | 0.317748  |
| 9             | 6             | 0           | -1.145134               | -4.908244 | -0.979784 |
| 10            | 6             | 0           | -0.002376               | -5.471431 | -0.428129 |
| 11            | 1             | 0           | 1.935175                | -5.100865 | 0.461800  |
| 12            | 1             | 0           | -1.928138               | -5.558346 | -1.348903 |

|    |    |   |           |           |           |
|----|----|---|-----------|-----------|-----------|
| 13 | 1  | 0 | 0.083815  | -6.553393 | -0.377657 |
| 14 | 8  | 0 | -3.639752 | -1.104555 | -2.262939 |
| 15 | 7  | 0 | -2.419387 | -2.936186 | -1.631120 |
| 16 | 46 | 0 | 1.105245  | -0.119384 | -0.119465 |
| 17 | 6  | 0 | -3.479416 | -3.794041 | -2.161856 |
| 18 | 1  | 0 | -3.091752 | -4.433464 | -2.961864 |
| 19 | 1  | 0 | -3.899180 | -4.423342 | -1.369872 |
| 20 | 1  | 0 | -4.252732 | -3.139832 | -2.558282 |
| 21 | 35 | 0 | 3.736816  | -0.272988 | -0.043992 |
| 22 | 6  | 0 | -1.808321 | 0.787751  | -1.238505 |
| 23 | 6  | 0 | -2.139855 | 1.394222  | -2.460579 |
| 24 | 6  | 0 | -1.731756 | 1.583440  | -0.076553 |
| 25 | 6  | 0 | -2.365254 | 2.766328  | -2.539500 |
| 26 | 6  | 0 | -1.969044 | 2.960442  | -0.170184 |
| 27 | 6  | 0 | -2.280978 | 3.555667  | -1.390624 |
| 28 | 1  | 0 | -2.612064 | 3.216984  | -3.497036 |
| 29 | 1  | 0 | -1.897363 | 3.569191  | 0.727817  |
| 30 | 1  | 0 | -2.459712 | 4.626224  | -1.445164 |
| 31 | 6  | 0 | -1.363063 | 0.973377  | 1.254494  |
| 32 | 1  | 0 | -1.679343 | 1.648429  | 2.063718  |
| 33 | 1  | 0 | -1.879703 | 0.015885  | 1.399382  |
| 34 | 1  | 0 | -2.227594 | 0.779618  | -3.349217 |
| 35 | 8  | 0 | 0.045570  | 0.783010  | 1.400374  |
| 36 | 1  | 0 | 0.578777  | 2.277889  | 1.695046  |
| 37 | 6  | 0 | 1.516782  | 3.336513  | 3.038087  |
| 38 | 8  | 0 | 0.784295  | 3.249085  | 1.940561  |
| 39 | 8  | 0 | 1.930913  | 2.365990  | 3.670277  |
| 40 | 6  | 0 | 1.807664  | 4.764605  | 3.433677  |
| 41 | 1  | 0 | 0.875020  | 5.332726  | 3.507137  |
| 42 | 1  | 0 | 2.340488  | 4.788692  | 4.384883  |
| 43 | 1  | 0 | 2.416306  | 5.240633  | 2.657082  |
| 44 | 19 | 0 | 2.163538  | -0.120719 | 2.946168  |

-----

**N**

-----

| Center Number | Atomic Number | Atomic Type | Coordinates (Angstroms) |           |           |
|---------------|---------------|-------------|-------------------------|-----------|-----------|
|               |               |             | X                       | Y         | Z         |
| 1             | 6             | 0           | -0.458709               | -1.287179 | -0.608430 |
| 2             | 6             | 0           | -0.291300               | -2.725737 | -0.554448 |
| 3             | 6             | 0           | -1.573444               | -0.710705 | -1.138618 |

-----

|    |    |   |           |           |           |
|----|----|---|-----------|-----------|-----------|
| 4  | 6  | 0 | 0.833540  | -3.355624 | 0.020933  |
| 5  | 6  | 0 | -1.310860 | -3.543593 | -1.118335 |
| 6  | 6  | 0 | -2.633875 | -1.557220 | -1.733814 |
| 7  | 6  | 0 | 0.962851  | -4.735811 | 0.048724  |
| 8  | 1  | 0 | 1.619108  | -2.732825 | 0.441441  |
| 9  | 6  | 0 | -1.170989 | -4.945950 | -1.079285 |
| 10 | 6  | 0 | -0.049549 | -5.529135 | -0.504455 |
| 11 | 1  | 0 | 1.842416  | -5.193482 | 0.491378  |
| 12 | 1  | 0 | -1.940022 | -5.582135 | -1.498849 |
| 13 | 1  | 0 | 0.035343  | -6.612239 | -0.489013 |
| 14 | 8  | 0 | -3.652053 | -1.096083 | -2.245783 |
| 15 | 7  | 0 | -2.427219 | -2.948636 | -1.691701 |
| 16 | 46 | 0 | 1.135299  | -0.241501 | -0.071099 |
| 17 | 6  | 0 | -3.471198 | -3.784228 | -2.285681 |
| 18 | 1  | 0 | -3.058009 | -4.395707 | -3.094608 |
| 19 | 1  | 0 | -3.917847 | -4.440479 | -1.530957 |
| 20 | 1  | 0 | -4.230856 | -3.114488 | -2.682553 |
| 21 | 35 | 0 | 3.753515  | 0.054253  | 0.218652  |
| 22 | 6  | 0 | -1.803971 | 0.759806  | -1.167807 |
| 23 | 6  | 0 | -2.161779 | 1.390225  | -2.371003 |
| 24 | 6  | 0 | -1.676901 | 1.539042  | 0.001674  |
| 25 | 6  | 0 | -2.368565 | 2.766061  | -2.424812 |
| 26 | 6  | 0 | -1.900156 | 2.920288  | -0.066606 |
| 27 | 6  | 0 | -2.240301 | 3.537527  | -1.268062 |
| 28 | 1  | 0 | -2.635704 | 3.233506  | -3.368776 |
| 29 | 1  | 0 | -1.792248 | 3.516026  | 0.836133  |
| 30 | 1  | 0 | -2.405956 | 4.611025  | -1.301794 |
| 31 | 6  | 0 | -1.277334 | 0.912052  | 1.316594  |
| 32 | 1  | 0 | -1.576492 | 1.578785  | 2.139455  |
| 33 | 1  | 0 | -1.789245 | -0.047369 | 1.462026  |
| 34 | 1  | 0 | -2.285316 | 0.790385  | -3.265080 |
| 35 | 8  | 0 | 0.135574  | 0.725441  | 1.440528  |
| 36 | 1  | 0 | 0.667358  | 2.269073  | 1.639002  |
| 37 | 6  | 0 | 1.492415  | 3.429301  | 2.969612  |
| 38 | 8  | 0 | 0.861231  | 3.252042  | 1.820073  |
| 39 | 8  | 0 | 1.827933  | 2.514885  | 3.719918  |
| 40 | 6  | 0 | 1.774124  | 4.883901  | 3.260262  |
| 41 | 1  | 0 | 0.856813  | 5.473200  | 3.166511  |
| 42 | 1  | 0 | 2.193046  | 4.990986  | 4.261406  |
| 43 | 1  | 0 | 2.484375  | 5.269669  | 2.520564  |
| 44 | 19 | 0 | 2.177735  | 0.014358  | 3.097408  |

---



## O

---

| Center Number | Atomic Number | Atomic Type | Coordinates (Angstroms) |           |           |
|---------------|---------------|-------------|-------------------------|-----------|-----------|
|               |               |             | X                       | Y         | Z         |
| 1             | 6             | 0           | -0.244378               | -0.211228 | 0.521461  |
| 2             | 6             | 0           | 0.124922                | -1.579419 | 0.816035  |
| 3             | 6             | 0           | -1.507128               | 0.116712  | 0.112958  |
| 4             | 6             | 0           | 1.399318                | -1.944453 | 1.297690  |
| 5             | 6             | 0           | -0.844758               | -2.603189 | 0.620482  |
| 6             | 6             | 0           | -2.513744               | -0.942594 | -0.116530 |
| 7             | 6             | 0           | 1.726247                | -3.264548 | 1.568573  |
| 8             | 1             | 0           | 2.120760                | -1.151092 | 1.468616  |
| 9             | 6             | 0           | -0.500772               | -3.942910 | 0.894467  |
| 10            | 6             | 0           | 0.767936                | -4.264218 | 1.359890  |
| 11            | 1             | 0           | 2.712630                | -3.517294 | 1.946120  |
| 12            | 1             | 0           | -1.226268               | -4.733587 | 0.749406  |
| 13            | 1             | 0           | 1.008022                | -5.303496 | 1.568265  |
| 14            | 8             | 0           | -3.649769               | -0.719175 | -0.533583 |
| 15            | 7             | 0           | -2.111665               | -2.265109 | 0.161391  |
| 16            | 46            | 0           | 1.140469                | 1.208090  | 0.658506  |
| 17            | 6             | 0           | -3.117222               | -3.309284 | -0.029611 |
| 18            | 1             | 0           | -2.785199               | -4.035067 | -0.780287 |
| 19            | 1             | 0           | -3.311438               | -3.833396 | 0.912265  |
| 20            | 1             | 0           | -4.026086               | -2.818737 | -0.371347 |
| 21            | 6             | 0           | -1.949733               | 1.520882  | -0.130024 |
| 22            | 6             | 0           | -2.556889               | 1.861411  | -1.349732 |
| 23            | 6             | 0           | -1.765356               | 2.524201  | 0.848401  |
| 24            | 6             | 0           | -2.945152               | 3.172073  | -1.620128 |
| 25            | 6             | 0           | -2.168255               | 3.833983  | 0.562076  |
| 26            | 6             | 0           | -2.749707               | 4.166732  | -0.660580 |
| 27            | 1             | 0           | -3.406863               | 3.412494  | -2.574504 |
| 28            | 1             | 0           | -2.024920               | 4.601153  | 1.319955  |
| 29            | 1             | 0           | -3.055299               | 5.190925  | -0.859428 |
| 30            | 6             | 0           | -1.129432               | 2.212293  | 2.191049  |
| 31            | 1             | 0           | -1.361940               | 3.032359  | 2.888151  |
| 32            | 1             | 0           | -1.584436               | 1.298077  | 2.608098  |
| 33            | 1             | 0           | -2.735685               | 1.084569  | -2.085078 |
| 34            | 8             | 0           | 0.273307                | 2.099957  | 2.155624  |
| 35            | 6             | 0           | 1.954731                | -0.061757 | -1.968742 |
| 36            | 8             | 0           | 2.389077                | 0.493307  | -0.942136 |
| 37            | 1             | 0           | 0.891305                | -0.302334 | -2.080224 |
| 38            | 7             | 0           | 2.724011                | -0.415510 | -3.008199 |

---

|    |   |   |          |           |           |
|----|---|---|----------|-----------|-----------|
| 39 | 6 | 0 | 2.156918 | -1.066827 | -4.180863 |
| 40 | 1 | 0 | 2.337104 | -0.462694 | -5.077744 |
| 41 | 1 | 0 | 2.610841 | -2.054138 | -4.326261 |
| 42 | 1 | 0 | 1.079314 | -1.190957 | -4.051594 |
| 43 | 6 | 0 | 4.161273 | -0.165038 | -3.005211 |
| 44 | 1 | 0 | 4.431552 | 0.317586  | -2.066820 |
| 45 | 1 | 0 | 4.706466 | -1.110873 | -3.102625 |
| 46 | 1 | 0 | 4.430538 | 0.486167  | -3.844712 |

-----

**TS<sub>OP</sub>**

-----

| Center Number | Atomic Number | Atomic Type | Coordinates (Angstroms) |           |           |
|---------------|---------------|-------------|-------------------------|-----------|-----------|
|               |               |             | X                       | Y         | Z         |
| 1             | 6             | 0           | -0.510003               | -0.944760 | -0.720225 |
| 2             | 6             | 0           | -0.265291               | -2.274972 | -0.208902 |
| 3             | 6             | 0           | -1.635788               | -0.647963 | -1.458699 |
| 4             | 6             | 0           | 0.817880                | -2.583265 | 0.634889  |
| 5             | 6             | 0           | -1.168255               | -3.305972 | -0.584926 |
| 6             | 6             | 0           | -2.532994               | -1.715951 | -1.895515 |
| 7             | 6             | 0           | 1.024327                | -3.872594 | 1.101221  |
| 8             | 1             | 0           | 1.484838                | -1.775711 | 0.919537  |
| 9             | 6             | 0           | -0.940873               | -4.615203 | -0.111145 |
| 10            | 6             | 0           | 0.138582                | -4.888370 | 0.719280  |
| 11            | 1             | 0           | 1.862150                | -4.089920 | 1.756943  |
| 12            | 1             | 0           | -1.612051               | -5.418797 | -0.387591 |
| 13            | 1             | 0           | 0.288179                | -5.904593 | 1.074496  |
| 14            | 8             | 0           | -3.494290               | -1.538873 | -2.649485 |
| 15            | 7             | 0           | -2.244597               | -3.015796 | -1.416548 |
| 16            | 46            | 0           | 1.069206                | 0.289731  | -0.902457 |
| 17            | 6             | 0           | -3.158670               | -4.081189 | -1.818874 |
| 18            | 1             | 0           | -2.626633               | -4.862824 | -2.373296 |
| 19            | 1             | 0           | -3.639679               | -4.531742 | -0.943481 |
| 20            | 1             | 0           | -3.913891               | -3.628137 | -2.457975 |
| 21            | 6             | 0           | -1.942575               | 0.766164  | -1.779697 |
| 22            | 6             | 0           | -2.445175               | 1.188979  | -3.019582 |
| 23            | 6             | 0           | -1.696238               | 1.730213  | -0.774923 |
| 24            | 6             | 0           | -2.667075               | 2.544122  | -3.270351 |
| 25            | 6             | 0           | -1.914851               | 3.083070  | -1.043095 |
| 26            | 6             | 0           | -2.394004               | 3.497194  | -2.287908 |
| 27            | 1             | 0           | -3.055856               | 2.854347  | -4.237223 |

|    |   |   |           |           |           |
|----|---|---|-----------|-----------|-----------|
| 28 | 1 | 0 | -1.722661 | 3.816001  | -0.261998 |
| 29 | 1 | 0 | -2.562028 | 4.553056  | -2.483756 |
| 30 | 6 | 0 | -1.309449 | 1.269002  | 0.617287  |
| 31 | 1 | 0 | -1.073105 | 2.142929  | 1.239960  |
| 32 | 1 | 0 | -2.177302 | 0.759631  | 1.071487  |
| 33 | 1 | 0 | -2.681100 | 0.446349  | -3.772276 |
| 34 | 8 | 0 | -0.214825 | 0.364102  | 0.690157  |
| 35 | 6 | 0 | 1.649213  | -0.465215 | -3.714841 |
| 36 | 8 | 0 | 2.212199  | -0.038339 | -2.689384 |
| 37 | 1 | 0 | 0.605970  | -0.804663 | -3.692246 |
| 38 | 7 | 0 | 2.244601  | -0.555225 | -4.913292 |
| 39 | 6 | 0 | 1.531748  | -1.069963 | -6.074211 |
| 40 | 1 | 0 | 1.488987  | -0.310238 | -6.863474 |
| 41 | 1 | 0 | 2.037269  | -1.958415 | -6.470864 |
| 42 | 1 | 0 | 0.511625  | -1.341510 | -5.792925 |
| 43 | 6 | 0 | 3.628587  | -0.134676 | -5.101517 |
| 44 | 1 | 0 | 4.013271  | 0.237549  | -4.152716 |
| 45 | 1 | 0 | 4.236949  | -0.982191 | -5.438030 |
| 46 | 1 | 0 | 3.679810  | 0.658279  | -5.856476 |

**P**

| Center Number | Atomic Number | Atomic Type | Coordinates (Angstroms) |           |           |
|---------------|---------------|-------------|-------------------------|-----------|-----------|
|               |               |             | X                       | Y         | Z         |
| 1             | 6             | 0           | -0.412937               | -0.187031 | 1.330204  |
| 2             | 6             | 0           | -0.171385               | -1.523245 | 1.866773  |
| 3             | 6             | 0           | -1.390169               | 0.032711  | 0.321456  |
| 4             | 6             | 0           | 0.739299                | -1.743901 | 2.912477  |
| 5             | 6             | 0           | -0.897697               | -2.613825 | 1.324219  |
| 6             | 6             | 0           | -2.130702               | -1.124640 | -0.230903 |
| 7             | 6             | 0           | 0.966404                | -3.022913 | 3.404414  |
| 8             | 1             | 0           | 1.260861                | -0.887123 | 3.324407  |
| 9             | 6             | 0           | -0.653271               | -3.904396 | 1.829055  |
| 10            | 6             | 0           | 0.269679                | -4.102623 | 2.852487  |
| 11            | 1             | 0           | 1.677055                | -3.180116 | 4.210642  |
| 12            | 1             | 0           | -1.186914               | -4.757531 | 1.429219  |
| 13            | 1             | 0           | 0.437610                | -5.109665 | 3.224938  |
| 14            | 8             | 0           | -2.992327               | -1.018161 | -1.106302 |
| 15            | 7             | 0           | -1.843767               | -2.391410 | 0.321133  |
| 16            | 46            | 0           | 0.588525                | -0.149117 | -0.567248 |

|    |   |   |           |           |           |
|----|---|---|-----------|-----------|-----------|
| 17 | 6 | 0 | -2.581408 | -3.525211 | -0.228104 |
| 18 | 1 | 0 | -1.897645 | -4.241656 | -0.698634 |
| 19 | 1 | 0 | -3.146301 | -4.036721 | 0.558993  |
| 20 | 1 | 0 | -3.268704 | -3.132294 | -0.974010 |
| 21 | 6 | 0 | -1.879259 | 1.420866  | 0.107068  |
| 22 | 6 | 0 | -2.566600 | 1.850726  | -1.040355 |
| 23 | 6 | 0 | -1.612229 | 2.358950  | 1.125538  |
| 24 | 6 | 0 | -2.970950 | 3.180032  | -1.163268 |
| 25 | 6 | 0 | -2.006256 | 3.688516  | 0.986194  |
| 26 | 6 | 0 | -2.690664 | 4.106391  | -0.156952 |
| 27 | 1 | 0 | -3.506645 | 3.493411  | -2.055917 |
| 28 | 1 | 0 | -1.783964 | 4.399105  | 1.779993  |
| 29 | 1 | 0 | -2.999778 | 5.143170  | -0.259655 |
| 30 | 6 | 0 | -0.945613 | 1.860808  | 2.382225  |
| 31 | 1 | 0 | -0.416987 | 2.662501  | 2.903965  |
| 32 | 1 | 0 | -1.692583 | 1.437397  | 3.075575  |
| 33 | 1 | 0 | -2.790327 | 1.131056  | -1.816216 |
| 34 | 8 | 0 | 0.043376  | 0.858310  | 2.116277  |
| 35 | 6 | 0 | 1.795250  | -0.126479 | -3.430388 |
| 36 | 8 | 0 | 2.041916  | -0.139065 | -2.217793 |
| 37 | 1 | 0 | 0.764996  | -0.124236 | -3.812535 |
| 38 | 7 | 0 | 2.737922  | -0.114043 | -4.394285 |
| 39 | 6 | 0 | 2.381840  | -0.098282 | -5.803922 |
| 40 | 1 | 0 | 2.780979  | 0.798879  | -6.292832 |
| 41 | 1 | 0 | 2.786295  | -0.981147 | -6.314017 |
| 42 | 1 | 0 | 1.294248  | -0.100224 | -5.910859 |
| 43 | 6 | 0 | 4.154899  | -0.113249 | -4.053367 |
| 44 | 1 | 0 | 4.250017  | -0.123825 | -2.968018 |
| 45 | 1 | 0 | 4.646179  | -0.998675 | -4.474168 |
| 46 | 1 | 0 | 4.640598  | 0.783496  | -4.456272 |

---

**DMF**

---

| Center Number | Atomic Number | Atomic Type | Coordinates (Angstroms) |           |           |
|---------------|---------------|-------------|-------------------------|-----------|-----------|
|               |               |             | X                       | Y         | Z         |
| 1             | 6             | 0           | 0.423519                | 0.260808  | 0.058164  |
| 2             | 8             | 0           | 1.135727                | 0.512259  | -0.899725 |
| 3             | 1             | 0           | 0.696420                | 0.545044  | 1.093744  |
| 4             | 7             | 0           | -0.778513               | -0.386477 | 0.009962  |
| 5             | 6             | 0           | -1.559488               | -0.642147 | 1.202983  |

|    |   |   |           |           |           |
|----|---|---|-----------|-----------|-----------|
| 6  | 1 | 0 | -2.544277 | -0.159304 | 1.142256  |
| 7  | 1 | 0 | -1.715764 | -1.719452 | 1.349793  |
| 8  | 1 | 0 | -1.034516 | -0.246929 | 2.077486  |
| 9  | 6 | 0 | -1.309842 | -0.841423 | -1.263143 |
| 10 | 1 | 0 | -0.596528 | -0.568610 | -2.041588 |
| 11 | 1 | 0 | -1.449612 | -1.930347 | -1.258391 |
| 12 | 1 | 0 | -2.278599 | -0.368529 | -1.471067 |

---

### NBE

---

| Center Number | Atomic Number | Atomic Type | Coordinates (Angstroms) |           |           |
|---------------|---------------|-------------|-------------------------|-----------|-----------|
|               |               |             | X                       | Y         | Z         |
| 1             | 6             | 0           | -0.108665               | -0.608299 | -0.009282 |
| 2             | 6             | 0           | 1.459680                | -0.582058 | -0.008525 |
| 3             | 6             | 0           | 0.922882                | 1.610256  | -0.008753 |
| 4             | 6             | 0           | -0.480307               | 0.908422  | -0.008581 |
| 5             | 1             | 0           | -0.506924               | -1.144028 | -0.876096 |
| 6             | 1             | 0           | -0.483475               | -1.109290 | 0.890770  |
| 7             | 1             | 0           | -1.082130               | 1.199847  | -0.874602 |
| 8             | 1             | 0           | -1.043479               | 1.178796  | 0.892176  |
| 9             | 6             | 0           | 1.716815                | 0.642824  | 0.901884  |
| 10            | 1             | 0           | 2.777307                | 0.902467  | 0.978153  |
| 11            | 1             | 0           | 1.288711                | 0.538293  | 1.906943  |
| 12            | 6             | 0           | 1.876843                | -0.008194 | -1.355811 |
| 13            | 6             | 0           | 1.557566                | 1.293665  | -1.356022 |
| 14            | 1             | 0           | 1.925586                | -1.527502 | 0.280588  |
| 15            | 1             | 0           | 0.899002                | 2.664058  | 0.280114  |
| 16            | 1             | 0           | 1.615483                | 1.985597  | -2.190901 |
| 17            | 1             | 0           | 2.247790                | -0.595257 | -2.190620 |

---

### KOAc

---

| Center Number | Atomic Number | Atomic Type | Coordinates (Angstroms) |          |           |
|---------------|---------------|-------------|-------------------------|----------|-----------|
|               |               |             | X                       | Y        | Z         |
| 1             | 6             | 0           | -0.573070               | 0.171577 | -0.038078 |
| 2             | 8             | 0           | 0.693812                | 0.197059 | 0.021994  |
| 3             | 8             | 0           | -1.330597               | 1.188372 | -0.068806 |
| 4             | 19            | 0           | 0.682624                | 2.744457 | -0.003402 |

|   |   |   |           |           |           |
|---|---|---|-----------|-----------|-----------|
| 5 | 6 | 0 | -1.245900 | -1.208312 | -0.035547 |
| 6 | 1 | 0 | -0.616083 | -1.946302 | -0.540701 |
| 7 | 1 | 0 | -1.377745 | -1.540082 | 1.002545  |
| 8 | 1 | 0 | -2.233123 | -1.162323 | -0.503252 |

---

### 3q

---

| Center Number | Atomic Number | Atomic Type | Coordinates (Angstroms) |           |           |
|---------------|---------------|-------------|-------------------------|-----------|-----------|
|               |               |             | X                       | Y         | Z         |
| 1             | 6             | 0           | -0.231786               | -0.519625 | 0.004996  |
| 2             | 6             | 0           | 1.161762                | -0.533164 | -0.045128 |
| 3             | 6             | 0           | 1.864056                | 0.671138  | -0.051321 |
| 4             | 6             | 0           | 1.208802                | 1.910217  | -0.009332 |
| 5             | 6             | 0           | -0.189146               | 1.882902  | 0.044452  |
| 6             | 6             | 0           | -0.916465               | 0.696591  | 0.049127  |
| 7             | 1             | 0           | -0.793343               | -1.449686 | 0.008695  |
| 8             | 1             | 0           | 1.700274                | -1.475834 | -0.078629 |
| 9             | 1             | 0           | 2.950643                | 0.664078  | -0.086054 |
| 10            | 1             | 0           | -1.999739               | 0.721870  | 0.086107  |
| 11            | 6             | 0           | 2.017122                | 3.184877  | 0.009197  |
| 12            | 1             | 0           | 3.016311                | 2.977338  | -0.404242 |
| 13            | 1             | 0           | 1.537862                | 3.934283  | -0.634386 |
| 14            | 8             | 0           | 2.109424                | 3.646294  | 1.354744  |
| 15            | 1             | 0           | 2.334608                | 4.588636  | 1.328372  |
| 16            | 35            | 0           | -1.225558               | 3.568412  | 0.099203  |

---

### AcOH•KI

---

| Center Number | Atomic Number | Atomic Type | Coordinates (Angstroms) |           |          |
|---------------|---------------|-------------|-------------------------|-----------|----------|
|               |               |             | X                       | Y         | Z        |
| 1             | 1             | 0           | 1.007606                | 0.779792  | 2.751118 |
| 2             | 19            | 0           | 3.212754                | 2.340122  | 1.157544 |
| 3             | 8             | 0           | 3.823832                | -0.167983 | 2.406567 |
| 4             | 6             | 0           | 2.637552                | -0.291999 | 2.654316 |
| 5             | 8             | 0           | 1.950279                | 0.803593  | 3.063099 |
| 6             | 53            | 0           | -0.036689               | 1.584078  | 0.439471 |
| 7             | 6             | 0           | 1.848524                | -1.567335 | 2.523835 |
| 8             | 1             | 0           | 1.368230                | -1.815023 | 3.476506 |

|    |   |   |          |           |          |
|----|---|---|----------|-----------|----------|
| 9  | 1 | 0 | 1.055439 | -1.421540 | 1.779019 |
| 10 | 1 | 0 | 2.505468 | -2.380076 | 2.212586 |

**AcOH•KBr**

| Center Number | Atomic Number | Atomic Type | Coordinates (Angstroms) |           |          |
|---------------|---------------|-------------|-------------------------|-----------|----------|
|               |               |             | X                       | Y         | Z        |
| 1             | 35            | 0           | 2.104766                | 0.241147  | 0.461687 |
| 2             | 1             | 0           | 1.738899                | 2.343844  | 1.218171 |
| 3             | 6             | 0           | 1.785427                | 3.416073  | 2.835033 |
| 4             | 8             | 0           | 1.573706                | 3.286519  | 1.538571 |
| 5             | 8             | 0           | 2.140533                | 2.505636  | 3.582594 |
| 6             | 6             | 0           | 1.546274                | 4.828576  | 3.316577 |
| 7             | 1             | 0           | 0.530137                | 5.143748  | 3.058539 |
| 8             | 1             | 0           | 1.694306                | 4.886278  | 4.395647 |
| 9             | 1             | 0           | 2.234895                | 5.512648  | 2.809247 |
| 10            | 19            | 0           | 2.739603                | -0.012800 | 3.457343 |

**a**

| Center Number | Atomic Number | Atomic Type | Coordinates (Angstroms) |           |          |
|---------------|---------------|-------------|-------------------------|-----------|----------|
|               |               |             | X                       | Y         | Z        |
| 1             | 6             | 0           | -2.378850               | -2.832599 | 2.587033 |
| 2             | 6             | 0           | -0.966489               | -2.277689 | 2.260422 |
| 3             | 6             | 0           | -2.269649               | -0.419782 | 2.210896 |
| 4             | 6             | 0           | -3.291325               | -1.561253 | 2.496456 |
| 5             | 1             | 0           | -2.684345               | -3.628350 | 1.896547 |
| 6             | 1             | 0           | -2.393365               | -3.256825 | 3.598821 |
| 7             | 1             | 0           | -4.042814               | -1.640898 | 1.702473 |
| 8             | 1             | 0           | -3.830070               | -1.393394 | 3.439036 |
| 9             | 6             | 0           | -1.048727               | -0.920550 | 3.007959 |
| 10            | 1             | 0           | -0.183560               | -0.265561 | 2.899188 |
| 11            | 1             | 0           | -1.252969               | -1.061857 | 4.078189 |
| 12            | 6             | 0           | -1.011289               | -1.904191 | 0.750102 |
| 13            | 1             | 0           | -1.506742               | -2.723109 | 0.214828 |
| 14            | 6             | 0           | -1.779214               | -0.555284 | 0.764980 |
| 15            | 1             | 0           | -2.572247               | -0.467726 | 0.014744 |
| 16            | 1             | 0           | -0.148932               | -2.949906 | 2.544475 |

|    |    |   |           |           |           |
|----|----|---|-----------|-----------|-----------|
| 17 | 1  | 0 | -2.632347 | 0.579699  | 2.465770  |
| 18 | 6  | 0 | 0.287789  | -1.533266 | 0.026496  |
| 19 | 6  | 0 | 0.476763  | -1.816940 | -1.401684 |
| 20 | 6  | 0 | 1.342162  | -0.940131 | 0.716670  |
| 21 | 6  | 0 | -0.514769 | -2.420234 | -2.195441 |
| 22 | 6  | 0 | 1.709708  | -1.455444 | -2.020913 |
| 23 | 6  | 0 | 2.644262  | -0.659456 | 0.109259  |
| 24 | 1  | 0 | 1.363271  | -0.901091 | 1.796800  |
| 25 | 6  | 0 | -0.323741 | -2.673027 | -3.548681 |
| 26 | 1  | 0 | -1.467548 | -2.671267 | -1.744443 |
| 27 | 6  | 0 | 1.888690  | -1.711679 | -3.393805 |
| 28 | 6  | 0 | 0.885742  | -2.312866 | -4.146199 |
| 29 | 1  | 0 | -1.114944 | -3.134335 | -4.133289 |
| 30 | 1  | 0 | 2.815986  | -1.433409 | -3.878463 |
| 31 | 1  | 0 | 1.052211  | -2.494781 | -5.205160 |
| 32 | 8  | 0 | 3.617355  | -0.290756 | 0.762940  |
| 33 | 7  | 0 | 2.732900  | -0.871486 | -1.276475 |
| 34 | 46 | 0 | -0.192053 | 0.686292  | 0.149998  |
| 35 | 8  | 0 | 1.034124  | 2.244115  | -0.605998 |
| 36 | 6  | 0 | -0.002039 | 3.065020  | -0.622202 |
| 37 | 8  | 0 | -1.119815 | 2.461696  | -0.160624 |
| 38 | 8  | 0 | 0.009214  | 4.231910  | -0.998909 |
| 39 | 6  | 0 | 3.964359  | -0.441709 | -1.927745 |
| 40 | 1  | 0 | 4.498030  | -1.292222 | -2.370313 |
| 41 | 1  | 0 | 3.742665  | 0.294731  | -2.706948 |
| 42 | 1  | 0 | 4.584510  | 0.012920  | -1.157555 |

-----

**TS<sub>ab</sub>**

-----

| Center Number | Atomic Number | Atomic Type | Coordinates (Angstroms) |           |           |
|---------------|---------------|-------------|-------------------------|-----------|-----------|
|               |               |             | X                       | Y         | Z         |
| 1             | 6             | 0           | 0.618578                | -0.076022 | 0.143725  |
| 2             | 6             | 0           | 2.081934                | 0.366322  | -0.104615 |
| 3             | 6             | 0           | 1.055307                | 2.313434  | 0.444827  |
| 4             | 6             | 0           | -0.096845               | 1.267712  | 0.507758  |
| 5             | 1             | 0           | 0.174664                | -0.570173 | -0.730453 |
| 6             | 1             | 0           | 0.568839                | -0.787915 | 0.977167  |
| 7             | 1             | 0           | -0.919548               | 1.507750  | -0.177350 |
| 8             | 1             | 0           | -0.519465               | 1.229056  | 1.519826  |
| 9             | 6             | 0           | 2.248579                | 1.476009  | 0.954574  |



|    |    |   |          |           |           |
|----|----|---|----------|-----------|-----------|
| 10 | 1  | 0 | 3.198344 | 2.013397  | 0.906819  |
| 11 | 1  | 0 | 2.097341 | 1.102519  | 1.976244  |
| 12 | 6  | 0 | 2.111867 | 1.175177  | -1.442383 |
| 13 | 1  | 0 | 1.477084 | 0.668564  | -2.182981 |
| 14 | 6  | 0 | 1.406663 | 2.509449  | -1.038257 |
| 15 | 1  | 0 | 0.522666 | 2.726731  | -1.660164 |
| 16 | 1  | 0 | 2.808348 | -0.451800 | -0.072388 |
| 17 | 1  | 0 | 0.853919 | 3.245193  | 0.973867  |
| 18 | 6  | 0 | 3.480227 | 1.364023  | -2.082282 |
| 19 | 6  | 0 | 4.012547 | 0.308572  | -2.935277 |
| 20 | 6  | 0 | 4.200243 | 2.519521  | -1.854511 |
| 21 | 6  | 0 | 3.366456 | -0.930029 | -3.132269 |
| 22 | 6  | 0 | 5.278743 | 0.502098  | -3.565209 |
| 23 | 6  | 0 | 5.388203 | 2.792813  | -2.671447 |
| 24 | 1  | 0 | 4.293974 | 3.188387  | -0.684247 |
| 25 | 6  | 0 | 3.922531 | -1.943642 | -3.903597 |
| 26 | 1  | 0 | 2.408869 | -1.102230 | -2.653269 |
| 27 | 6  | 0 | 5.832828 | -0.530289 | -4.347763 |
| 28 | 6  | 0 | 5.163090 | -1.738187 | -4.513897 |
| 29 | 1  | 0 | 3.395231 | -2.886197 | -4.026718 |
| 30 | 1  | 0 | 6.792525 | -0.388255 | -4.830074 |
| 31 | 1  | 0 | 5.614014 | -2.518817 | -5.122205 |
| 32 | 8  | 0 | 5.920587 | 3.900821  | -2.737288 |
| 33 | 7  | 0 | 5.938542 | 1.713916  | -3.413157 |
| 34 | 46 | 0 | 2.524164 | 4.103033  | -1.543304 |
| 35 | 8  | 0 | 4.574433 | 3.713322  | 0.489745  |
| 36 | 6  | 0 | 3.817868 | 4.679720  | 0.965819  |
| 37 | 8  | 0 | 2.698278 | 5.034945  | 0.309430  |
| 38 | 8  | 0 | 4.084648 | 5.278328  | 2.013049  |
| 39 | 6  | 0 | 7.200231 | 1.954625  | -4.100442 |
| 40 | 1  | 0 | 7.961076 | 1.230928  | -3.784082 |
| 41 | 1  | 0 | 7.079856 | 1.887096  | -5.189248 |
| 42 | 1  | 0 | 7.511139 | 2.963995  | -3.835166 |

**b**

| Center Number | Atomic Number | Atomic Type | Coordinates (Angstroms) |           |          |
|---------------|---------------|-------------|-------------------------|-----------|----------|
|               |               |             | X                       | Y         | Z        |
| 1             | 6             | 0           | -2.762462               | -2.322163 | 1.587289 |
| 2             | 6             | 0           | -1.286289               | -2.186339 | 1.144436 |

|    |    |   |           |           |           |
|----|----|---|-----------|-----------|-----------|
| 3  | 6  | 0 | -1.691245 | -0.199364 | 2.161464  |
| 4  | 6  | 0 | -3.051496 | -0.946356 | 2.273100  |
| 5  | 1  | 0 | -3.431744 | -2.524344 | 0.741558  |
| 6  | 1  | 0 | -2.878413 | -3.150669 | 2.297705  |
| 7  | 1  | 0 | -3.863378 | -0.392322 | 1.788393  |
| 8  | 1  | 0 | -3.332665 | -1.078880 | 3.325605  |
| 9  | 6  | 0 | -0.694909 | -1.367968 | 2.311317  |
| 10 | 1  | 0 | 0.343291  | -1.065612 | 2.146685  |
| 11 | 1  | 0 | -0.773479 | -1.887527 | 3.275456  |
| 12 | 6  | 0 | -1.234146 | -1.167499 | -0.041976 |
| 13 | 1  | 0 | -2.048817 | -1.394965 | -0.748633 |
| 14 | 6  | 0 | -1.495595 | 0.203155  | 0.686594  |
| 15 | 1  | 0 | -2.360938 | 0.741075  | 0.283099  |
| 16 | 1  | 0 | -0.796436 | -3.141001 | 0.930102  |
| 17 | 1  | 0 | -1.586342 | 0.624622  | 2.869082  |
| 18 | 6  | 0 | 0.076611  | -1.108181 | -0.780497 |
| 19 | 6  | 0 | 0.571167  | -2.181469 | -1.622116 |
| 20 | 6  | 0 | 0.780601  | 0.056374  | -0.631250 |
| 21 | 6  | 0 | -0.149884 | -3.366448 | -1.870671 |
| 22 | 6  | 0 | 1.842339  | -2.024586 | -2.249549 |
| 23 | 6  | 0 | 2.080772  | 0.229067  | -1.270466 |
| 24 | 1  | 0 | 0.306739  | 1.909822  | 2.829590  |
| 25 | 6  | 0 | 0.347515  | -4.373551 | -2.689361 |
| 26 | 1  | 0 | -1.124708 | -3.485300 | -1.408788 |
| 27 | 6  | 0 | 2.340450  | -3.054774 | -3.070947 |
| 28 | 6  | 0 | 1.602105  | -4.214738 | -3.286286 |
| 29 | 1  | 0 | -0.235306 | -5.274883 | -2.861757 |
| 30 | 1  | 0 | 3.306783  | -2.948678 | -3.549722 |
| 31 | 1  | 0 | 2.008865  | -4.993726 | -3.926909 |
| 32 | 8  | 0 | 2.759933  | 1.256729  | -1.157530 |
| 33 | 7  | 0 | 2.567373  | -0.853231 | -2.045996 |
| 34 | 46 | 0 | 0.009956  | 1.554294  | 0.411272  |
| 35 | 8  | 0 | -0.056751 | 2.564133  | 3.455150  |
| 36 | 6  | 0 | -0.719579 | 3.518960  | 2.669467  |
| 37 | 8  | 0 | -0.741473 | 3.267849  | 1.400528  |
| 38 | 8  | 0 | -1.206497 | 4.476629  | 3.251902  |
| 39 | 6  | 0 | 3.873824  | -0.686214 | -2.669555 |
| 40 | 1  | 0 | 4.568533  | -1.468024 | -2.339399 |
| 41 | 1  | 0 | 3.797128  | -0.721182 | -3.763440 |
| 42 | 1  | 0 | 4.242968  | 0.290711  | -2.360871 |

| Center Number | Atomic Number | Atomic Type | Coordinates (Angstroms) |           |           |
|---------------|---------------|-------------|-------------------------|-----------|-----------|
|               |               |             | X                       | Y         | Z         |
| 1             | 6             | 0           | -3.141387               | -2.696816 | 2.871035  |
| 2             | 6             | 0           | -1.625624               | -2.642450 | 2.568468  |
| 3             | 6             | 0           | -2.251029               | -0.474001 | 2.384498  |
| 4             | 6             | 0           | -3.584284               | -1.204893 | 2.715897  |
| 5             | 1             | 0           | -3.677598               | -3.371340 | 2.193026  |
| 6             | 1             | 0           | -3.316260               | -3.055369 | 3.892178  |
| 7             | 1             | 0           | -4.334545               | -1.065785 | 1.929283  |
| 8             | 1             | 0           | -4.015838               | -0.820087 | 3.648007  |
| 9             | 6             | 0           | -1.238246               | -1.293755 | 3.210294  |
| 10            | 1             | 0           | -0.201004               | -1.000298 | 3.024186  |
| 11            | 1             | 0           | -1.433628               | -1.270886 | 4.289661  |
| 12            | 6             | 0           | -1.462033               | -2.352510 | 1.037728  |
| 13            | 1             | 0           | -2.172982               | -2.979098 | 0.477929  |
| 14            | 6             | 0           | -1.847429               | -0.833335 | 0.938742  |
| 15            | 1             | 0           | -2.660190               | -0.658627 | 0.221460  |
| 16            | 1             | 0           | -1.069615               | -3.517167 | 2.917293  |
| 17            | 1             | 0           | -2.288644               | 0.600119  | 2.591564  |
| 18            | 6             | 0           | -0.081730               | -2.557117 | 0.486212  |
| 19            | 6             | 0           | 0.510461                | -3.867525 | 0.313444  |
| 20            | 6             | 0           | 0.596200                | -1.422706 | 0.117313  |
| 21            | 6             | 0           | -0.165521               | -5.065070 | 0.630419  |
| 22            | 6             | 0           | 1.825876                | -3.956286 | -0.215834 |
| 23            | 6             | 0           | 1.939919                | -1.517062 | -0.432969 |
| 24            | 6             | 0           | 0.426463                | -6.305239 | 0.447449  |
| 25            | 1             | 0           | -1.174430               | -5.006161 | 1.023988  |
| 26            | 6             | 0           | 2.421602                | -5.220592 | -0.393609 |
| 27            | 6             | 0           | 1.728384                | -6.377886 | -0.063855 |
| 28            | 1             | 0           | -0.116249               | -7.211886 | 0.698831  |
| 29            | 1             | 0           | 3.424180                | -5.303096 | -0.793964 |
| 30            | 1             | 0           | 2.205456                | -7.343065 | -0.210294 |
| 31            | 8             | 0           | 2.617600                | -0.524819 | -0.798351 |
| 32            | 7             | 0           | 2.505920                | -2.787109 | -0.559082 |
| 33            | 46            | 0           | -0.319612               | 0.343237  | 0.276798  |
| 34            | 6             | 0           | 3.866058                | -2.875988 | -1.093299 |
| 35            | 1             | 0           | 4.526576                | -3.370873 | -0.373937 |
| 36            | 1             | 0           | 3.874373                | -3.437688 | -2.033606 |
| 37            | 1             | 0           | 4.212161                | -1.861329 | -1.272026 |
| 38            | 35            | 0           | -1.558979               | 2.832132  | 0.069891  |
| 39            | 6             | 0           | -0.968458               | 2.942654  | -1.836386 |

|    |   |   |           |          |           |
|----|---|---|-----------|----------|-----------|
| 40 | 6 | 0 | -2.025287 | 3.053280 | -2.735119 |
| 41 | 6 | 0 | 0.380880  | 2.885844 | -2.220391 |
| 42 | 6 | 0 | -1.758852 | 3.120904 | -4.101862 |
| 43 | 6 | 0 | 0.597344  | 2.954800 | -3.609742 |
| 44 | 6 | 0 | -0.437953 | 3.069413 | -4.536207 |
| 45 | 1 | 0 | -2.579000 | 3.207673 | -4.808483 |
| 46 | 1 | 0 | 1.613062  | 2.914573 | -3.982466 |
| 47 | 1 | 0 | -0.204638 | 3.115044 | -5.596110 |
| 48 | 6 | 0 | 1.584681  | 2.808441 | -1.248628 |
| 49 | 1 | 0 | -3.045505 | 3.082900 | -2.369535 |
| 50 | 8 | 0 | 1.418885  | 1.735820 | -0.301660 |
| 51 | 1 | 0 | 1.979020  | 0.940880 | -0.554997 |
| 52 | 6 | 0 | 1.694906  | 4.119638 | -0.447515 |
| 53 | 1 | 0 | 2.560229  | 4.060046 | 0.220307  |
| 54 | 1 | 0 | 1.827850  | 4.971769 | -1.123504 |
| 55 | 1 | 0 | 0.807820  | 4.295140 | 0.162932  |
| 56 | 6 | 0 | 2.918859  | 2.567096 | -1.975798 |
| 57 | 1 | 0 | 3.194379  | 3.407381 | -2.620254 |
| 58 | 1 | 0 | 3.701006  | 2.457116 | -1.218856 |
| 59 | 1 | 0 | 2.895785  | 1.648410 | -2.569896 |

-----

**TS<sub>sGH</sub>**

-----

| Center Number | Atomic Number | Atomic Type | Coordinates (Angstroms) |           |           |
|---------------|---------------|-------------|-------------------------|-----------|-----------|
|               |               |             | X                       | Y         | Z         |
| 1             | 6             | 0           | -3.776913               | -2.335546 | 1.057246  |
| 2             | 6             | 0           | -2.247643               | -2.398920 | 0.837601  |
| 3             | 6             | 0           | -2.638596               | -0.173205 | 0.999399  |
| 4             | 6             | 0           | -4.054148               | -0.800467 | 1.154957  |
| 5             | 1             | 0           | -4.333886               | -2.816689 | 0.244572  |
| 6             | 1             | 0           | -4.052406               | -2.846974 | 1.986647  |
| 7             | 1             | 0           | -4.749721               | -0.443397 | 0.387400  |
| 8             | 1             | 0           | -4.482127               | -0.535022 | 2.128916  |
| 9             | 6             | 0           | -1.762301               | -1.223978 | 1.711234  |
| 10            | 1             | 0           | -0.689713               | -1.025246 | 1.622714  |
| 11            | 1             | 0           | -2.015301               | -1.353089 | 2.770405  |
| 12            | 6             | 0           | -1.953941               | -1.880005 | -0.613007 |
| 13            | 1             | 0           | -2.665973               | -2.338914 | -1.314611 |
| 14            | 6             | 0           | -2.216372               | -0.340161 | -0.474823 |
| 15            | 1             | 0           | -2.983530               | 0.014639  | -1.169584 |

|    |    |   |           |           |           |
|----|----|---|-----------|-----------|-----------|
| 16 | 1  | 0 | -1.804608 | -3.374129 | 1.055436  |
| 17 | 1  | 0 | -2.577729 | 0.850951  | 1.372688  |
| 18 | 6  | 0 | -0.551079 | -2.124156 | -1.083093 |
| 19 | 6  | 0 | -0.054381 | -3.452527 | -1.381036 |
| 20 | 6  | 0 | 0.253524  | -1.021598 | -1.222782 |
| 21 | 6  | 0 | -0.866400 | -4.605843 | -1.332973 |
| 22 | 6  | 0 | 1.305829  | -3.600762 | -1.761456 |
| 23 | 6  | 0 | 1.649081  | -1.178394 | -1.606971 |
| 24 | 6  | 0 | -0.364100 | -5.861958 | -1.634276 |
| 25 | 1  | 0 | -1.910207 | -4.500192 | -1.058755 |
| 26 | 6  | 0 | 1.810119  | -4.882492 | -2.058976 |
| 27 | 6  | 0 | 0.983165  | -5.995896 | -1.993374 |
| 28 | 1  | 0 | -1.010790 | -6.733392 | -1.592168 |
| 29 | 1  | 0 | 2.845402  | -5.011279 | -2.348221 |
| 30 | 1  | 0 | 1.391017  | -6.974868 | -2.229377 |
| 31 | 8  | 0 | 2.451393  | -0.222847 | -1.729464 |
| 32 | 7  | 0 | 2.121031  | -2.472162 | -1.839227 |
| 33 | 46 | 0 | -0.569203 | 0.808534  | -0.926726 |
| 34 | 6  | 0 | 3.533845  | -2.626919 | -2.193614 |
| 35 | 1  | 0 | 4.034234  | -3.286462 | -1.477573 |
| 36 | 1  | 0 | 3.634741  | -3.046077 | -3.200403 |
| 37 | 1  | 0 | 3.987664  | -1.639825 | -2.163240 |
| 38 | 35 | 0 | -1.808978 | 3.153142  | -0.738631 |
| 39 | 6  | 0 | -1.225970 | 2.142859  | -2.714707 |
| 40 | 6  | 0 | -2.391975 | 1.793697  | -3.391492 |
| 41 | 6  | 0 | -0.034694 | 2.508427  | -3.361337 |
| 42 | 6  | 0 | -2.378225 | 1.755293  | -4.785727 |
| 43 | 6  | 0 | -0.073756 | 2.468538  | -4.765096 |
| 44 | 6  | 0 | -1.217794 | 2.103990  | -5.474867 |
| 45 | 1  | 0 | -3.280476 | 1.471472  | -5.320568 |
| 46 | 1  | 0 | 0.826462  | 2.717001  | -5.317445 |
| 47 | 1  | 0 | -1.197793 | 2.093353  | -6.560686 |
| 48 | 6  | 0 | 1.252738  | 2.867500  | -2.601033 |
| 49 | 1  | 0 | -3.296613 | 1.564704  | -2.841486 |
| 50 | 8  | 0 | 1.292977  | 2.098088  | -1.374113 |
| 51 | 1  | 0 | 1.850903  | 1.277012  | -1.515380 |
| 52 | 6  | 0 | 1.266127  | 4.353307  | -2.207124 |
| 53 | 1  | 0 | 2.194444  | 4.579037  | -1.671766 |
| 54 | 1  | 0 | 1.212114  | 4.984066  | -3.101531 |
| 55 | 1  | 0 | 0.424765  | 4.595552  | -1.556831 |
| 56 | 6  | 0 | 2.521537  | 2.544374  | -3.408256 |
| 57 | 1  | 0 | 2.627026  | 3.202493  | -4.276009 |
| 58 | 1  | 0 | 3.392421  | 2.704199  | -2.764633 |

|    |   |   |          |          |           |
|----|---|---|----------|----------|-----------|
| 59 | 1 | 0 | 2.530052 | 1.503728 | -3.744306 |
|----|---|---|----------|----------|-----------|

---

**sH**

---

| Center Number | Atomic Number | Atomic Type | Coordinates (Angstroms) |           |           |
|---------------|---------------|-------------|-------------------------|-----------|-----------|
|               |               |             | X                       | Y         | Z         |
| 1             | 6             | 0           | -3.301856               | -2.241053 | 2.458967  |
| 2             | 6             | 0           | -1.791968               | -2.382521 | 2.155988  |
| 3             | 6             | 0           | -2.005634               | -0.173855 | 2.609289  |
| 4             | 6             | 0           | -3.454289               | -0.720689 | 2.779649  |
| 5             | 1             | 0           | -3.925419               | -2.562929 | 1.616743  |
| 6             | 1             | 0           | -3.577357               | -2.858997 | 3.320705  |
| 7             | 1             | 0           | -4.168553               | -0.210488 | 2.125870  |
| 8             | 1             | 0           | -3.786418               | -0.561023 | 3.811688  |
| 9             | 6             | 0           | -1.176043               | -1.363153 | 3.133284  |
| 10            | 1             | 0           | -0.094811               | -1.238195 | 3.011883  |
| 11            | 1             | 0           | -1.385153               | -1.601102 | 4.182216  |
| 12            | 6             | 0           | -1.515319               | -1.707635 | 0.763074  |
| 13            | 1             | 0           | -2.251868               | -2.060199 | 0.027901  |
| 14            | 6             | 0           | -1.720588               | -0.193277 | 1.094686  |
| 15            | 1             | 0           | -2.501148               | 0.300883  | 0.516760  |
| 16            | 1             | 0           | -1.414171               | -3.405016 | 2.223554  |
| 17            | 1             | 0           | -1.855199               | 0.795859  | 3.081291  |
| 18            | 6             | 0           | -0.119006               | -1.973129 | 0.271651  |
| 19            | 6             | 0           | 0.311157                | -3.300801 | -0.121118 |
| 20            | 6             | 0           | 0.753687                | -0.919835 | 0.234492  |
| 21            | 6             | 0           | -0.570358               | -4.399772 | -0.210473 |
| 22            | 6             | 0           | 1.674031                | -3.497753 | -0.467814 |
| 23            | 6             | 0           | 2.155604                | -1.122349 | -0.100610 |
| 24            | 6             | 0           | -0.132374               | -5.650578 | -0.614308 |
| 25            | 1             | 0           | -1.616673               | -4.256559 | 0.034875  |
| 26            | 6             | 0           | 2.112184                | -4.775722 | -0.868825 |
| 27            | 6             | 0           | 1.218119                | -5.834924 | -0.938044 |
| 28            | 1             | 0           | -0.831164               | -6.479019 | -0.679305 |
| 29            | 1             | 0           | 3.148057                | -4.941646 | -1.135362 |
| 30            | 1             | 0           | 1.575424                | -6.811173 | -1.253242 |
| 31            | 8             | 0           | 3.014439                | -0.213827 | -0.100223 |
| 32            | 7             | 0           | 2.558800                | -2.422660 | -0.409023 |
| 33            | 46            | 0           | -0.035301               | 0.922783  | 0.655886  |
| 34            | 6             | 0           | 3.978355                | -2.637865 | -0.705447 |

|    |    |   |           |           |           |
|----|----|---|-----------|-----------|-----------|
| 35 | 1  | 0 | 4.391127  | -3.399910 | -0.037599 |
| 36 | 1  | 0 | 4.109975  | -2.957175 | -1.744559 |
| 37 | 1  | 0 | 4.492420  | -1.693355 | -0.548379 |
| 38 | 35 | 0 | -1.243091 | 3.082699  | 1.463570  |
| 39 | 6  | 0 | -0.270834 | 1.103164  | -1.340162 |
| 40 | 6  | 0 | -1.283511 | 0.461781  | -2.045150 |
| 41 | 6  | 0 | 0.626301  | 1.989507  | -1.950976 |
| 42 | 6  | 0 | -1.445097 | 0.730953  | -3.407124 |
| 43 | 6  | 0 | 0.433104  | 2.239687  | -3.320439 |
| 44 | 6  | 0 | -0.586083 | 1.625087  | -4.043778 |
| 45 | 1  | 0 | -2.242219 | 0.239423  | -3.958379 |
| 46 | 1  | 0 | 1.097159  | 2.936223  | -3.825215 |
| 47 | 1  | 0 | -0.705185 | 1.842231  | -5.101566 |
| 48 | 6  | 0 | 1.742400  | 2.699170  | -1.177372 |
| 49 | 1  | 0 | -1.955449 | -0.232488 | -1.556764 |
| 50 | 8  | 0 | 1.842473  | 2.116510  | 0.148646  |
| 51 | 1  | 0 | 2.432046  | 1.312420  | 0.090107  |
| 52 | 6  | 0 | 1.404450  | 4.182381  | -0.977878 |
| 53 | 1  | 0 | 2.206514  | 4.665346  | -0.409918 |
| 54 | 1  | 0 | 1.306726  | 4.684087  | -1.946717 |
| 55 | 1  | 0 | 0.469985  | 4.290350  | -0.423270 |
| 56 | 6  | 0 | 3.106089  | 2.542178  | -1.872116 |
| 57 | 1  | 0 | 3.112222  | 3.037458  | -2.847819 |
| 58 | 1  | 0 | 3.880783  | 3.006795  | -1.252962 |
| 59 | 1  | 0 | 3.357929  | 1.487266  | -2.014964 |

-----

**TS<sub>sHI</sub>**

-----

| Center Number | Atomic Number | Atomic Type | Coordinates (Angstroms) |           |          |
|---------------|---------------|-------------|-------------------------|-----------|----------|
|               |               |             | X                       | Y         | Z        |
| 1             | 6             | 0           | -3.220868               | -2.283420 | 2.439603 |
| 2             | 6             | 0           | -1.703880               | -2.260939 | 2.149696 |
| 3             | 6             | 0           | -2.135140               | -0.095193 | 2.633952 |
| 4             | 6             | 0           | -3.533537               | -0.780068 | 2.714559 |
| 5             | 1             | 0           | -3.802967               | -2.698670 | 1.608179 |
| 6             | 1             | 0           | -3.427631               | -2.901127 | 3.320930 |
| 7             | 1             | 0           | -4.242499               | -0.353385 | 1.996784 |
| 8             | 1             | 0           | -3.960245               | -0.635857 | 3.713525 |
| 9             | 6             | 0           | -1.212924               | -1.210300 | 3.160210 |
| 10            | 1             | 0           | -0.148246               | -0.970378 | 3.070706 |

|    |    |   |           |           |           |
|----|----|---|-----------|-----------|-----------|
| 11 | 1  | 0 | -1.423150 | -1.496600 | 4.197027  |
| 12 | 6  | 0 | -1.514703 | -1.530566 | 0.760599  |
| 13 | 1  | 0 | -2.301174 | -1.885985 | 0.078560  |
| 14 | 6  | 0 | -1.739891 | -0.030986 | 1.150256  |
| 15 | 1  | 0 | -2.477156 | 0.483771  | 0.528815  |
| 16 | 1  | 0 | -1.220411 | -3.237888 | 2.199646  |
| 17 | 1  | 0 | -2.093662 | 0.864103  | 3.142663  |
| 18 | 6  | 0 | -0.160603 | -1.796328 | 0.153844  |
| 19 | 6  | 0 | 0.235943  | -3.148320 | -0.175596 |
| 20 | 6  | 0 | 0.696348  | -0.741355 | -0.116186 |
| 21 | 6  | 0 | -0.670103 | -4.235590 | -0.165843 |
| 22 | 6  | 0 | 1.569186  | -3.396919 | -0.595913 |
| 23 | 6  | 0 | 2.113046  | -1.021427 | -0.384906 |
| 24 | 6  | 0 | -0.281949 | -5.508874 | -0.546803 |
| 25 | 1  | 0 | -1.698210 | -4.062971 | 0.128338  |
| 26 | 6  | 0 | 1.959347  | -4.697289 | -0.968662 |
| 27 | 6  | 0 | 1.042599  | -5.738598 | -0.942182 |
| 28 | 1  | 0 | -1.001435 | -6.321883 | -0.539132 |
| 29 | 1  | 0 | 2.974189  | -4.893857 | -1.289698 |
| 30 | 1  | 0 | 1.359962  | -6.734256 | -1.238400 |
| 31 | 8  | 0 | 3.003122  | -0.149761 | -0.395396 |
| 32 | 7  | 0 | 2.477839  | -2.343250 | -0.616975 |
| 33 | 46 | 0 | -0.004356 | 1.031337  | 0.791090  |
| 34 | 6  | 0 | 3.894097  | -2.615157 | -0.887317 |
| 35 | 1  | 0 | 4.269235  | -3.368749 | -0.189092 |
| 36 | 1  | 0 | 4.026400  | -2.972447 | -1.913767 |
| 37 | 1  | 0 | 4.439756  | -1.685173 | -0.754583 |
| 38 | 35 | 0 | -0.725958 | 3.003736  | 2.266990  |
| 39 | 6  | 0 | 0.055068  | 0.651282  | -1.310889 |
| 40 | 6  | 0 | -0.961152 | 0.050712  | -2.078649 |
| 41 | 6  | 0 | 0.830645  | 1.691903  | -1.889530 |
| 42 | 6  | 0 | -1.190000 | 0.413330  | -3.399573 |
| 43 | 6  | 0 | 0.595929  | 2.010247  | -3.238953 |
| 44 | 6  | 0 | -0.387653 | 1.386290  | -3.996697 |
| 45 | 1  | 0 | -1.977730 | -0.080529 | -3.961751 |
| 46 | 1  | 0 | 1.182697  | 2.803233  | -3.693157 |
| 47 | 1  | 0 | -0.535405 | 1.666514  | -5.035754 |
| 48 | 6  | 0 | 1.779502  | 2.611227  | -1.099582 |
| 49 | 1  | 0 | -1.562346 | -0.740469 | -1.651971 |
| 50 | 8  | 0 | 1.925974  | 2.117787  | 0.249003  |
| 51 | 1  | 0 | 2.505945  | 1.313818  | 0.170783  |
| 52 | 6  | 0 | 1.153487  | 4.009102  | -0.964729 |
| 53 | 1  | 0 | 1.822461  | 4.645555  | -0.377107 |



|    |   |   |          |          |           |
|----|---|---|----------|----------|-----------|
| 54 | 1 | 0 | 1.004435 | 4.464203 | -1.948885 |
| 55 | 1 | 0 | 0.193672 | 3.957732 | -0.444946 |
| 56 | 6 | 0 | 3.176180 | 2.710205 | -1.738451 |
| 57 | 1 | 0 | 3.131343 | 3.183476 | -2.724352 |
| 58 | 1 | 0 | 3.815526 | 3.326447 | -1.097912 |
| 59 | 1 | 0 | 3.630478 | 1.722131 | -1.846546 |

-----

**sl**

-----

| Center Number | Atomic Number | Atomic Type | Coordinates (Angstroms) |           |           |
|---------------|---------------|-------------|-------------------------|-----------|-----------|
|               |               |             | X                       | Y         | Z         |
| 1             | 6             | 0           | -3.818014               | -1.252172 | 0.895390  |
| 2             | 6             | 0           | -2.502048               | -2.076048 | 0.944300  |
| 3             | 6             | 0           | -2.027694               | -0.256836 | 2.218558  |
| 4             | 6             | 0           | -3.495228               | 0.003132  | 1.763383  |
| 5             | 1             | 0           | -4.110410               | -1.000032 | -0.130039 |
| 6             | 1             | 0           | -4.635745               | -1.836336 | 1.330959  |
| 7             | 1             | 0           | -3.602980               | 0.943362  | 1.212054  |
| 8             | 1             | 0           | -4.147906               | 0.065833  | 2.641414  |
| 9             | 6             | 0           | -2.028547               | -1.789103 | 2.390240  |
| 10            | 1             | 0           | -1.037406               | -2.178538 | 2.637057  |
| 11            | 1             | 0           | -2.744410               | -2.131581 | 3.145964  |
| 12            | 6             | 0           | -1.478885               | -1.299487 | 0.069870  |
| 13            | 1             | 0           | -1.962954               | -1.022969 | -0.868983 |
| 14            | 6             | 0           | -1.191322               | -0.064488 | 0.960467  |
| 15            | 1             | 0           | -1.281684               | 0.912407  | 0.479626  |
| 16            | 1             | 0           | -2.670598               | -3.112678 | 0.650593  |
| 17            | 1             | 0           | -1.704503               | 0.333802  | 3.073568  |
| 18            | 6             | 0           | -0.040910               | -1.798854 | -0.278523 |
| 19            | 6             | 0           | 0.518384                | -3.131705 | 0.008964  |
| 20            | 6             | 0           | 0.712945                | -0.909017 | -1.101993 |
| 21            | 6             | 0           | -0.138936               | -4.112336 | 0.782692  |
| 22            | 6             | 0           | 1.787068                | -3.489725 | -0.531223 |
| 23            | 6             | 0           | 2.068307                | -1.297671 | -1.572696 |
| 24            | 6             | 0           | 0.391496                | -5.375062 | 0.999689  |
| 25            | 1             | 0           | -1.080775               | -3.878694 | 1.244297  |
| 26            | 6             | 0           | 2.315901                | -4.775391 | -0.313457 |
| 27            | 6             | 0           | 1.625558                | -5.711581 | 0.441821  |
| 28            | 1             | 0           | -0.155347               | -6.090247 | 1.606383  |
| 29            | 1             | 0           | 3.275786                | -5.044955 | -0.732523 |

|    |    |   |           |           |           |
|----|----|---|-----------|-----------|-----------|
| 30 | 1  | 0 | 2.055656  | -6.696464 | 0.598521  |
| 31 | 8  | 0 | 2.776200  | -0.514183 | -2.225747 |
| 32 | 7  | 0 | 2.528844  | -2.563716 | -1.270750 |
| 33 | 46 | 0 | 0.853208  | -0.221074 | 1.061749  |
| 34 | 6  | 0 | 3.864255  | -2.920494 | -1.762617 |
| 35 | 1  | 0 | 4.513889  | -3.192650 | -0.925542 |
| 36 | 1  | 0 | 3.802554  | -3.758636 | -2.463758 |
| 37 | 1  | 0 | 4.265459  | -2.048529 | -2.272066 |
| 38 | 35 | 0 | 1.225306  | 0.631921  | 3.406159  |
| 39 | 6  | 0 | 0.077937  | 0.158982  | -1.973846 |
| 40 | 6  | 0 | -0.852692 | -0.358732 | -2.899795 |
| 41 | 6  | 0 | 0.357531  | 1.548532  | -1.997917 |
| 42 | 6  | 0 | -1.565214 | 0.445322  | -3.780222 |
| 43 | 6  | 0 | -0.403289 | 2.343601  | -2.877814 |
| 44 | 6  | 0 | -1.353524 | 1.822198  | -3.748365 |
| 45 | 1  | 0 | -2.272583 | 0.002066  | -4.475380 |
| 46 | 1  | 0 | -0.233583 | 3.415434  | -2.889330 |
| 47 | 1  | 0 | -1.906793 | 2.485473  | -4.407603 |
| 48 | 6  | 0 | 1.447398  | 2.303429  | -1.188955 |
| 49 | 1  | 0 | -1.011955 | -1.434343 | -2.920342 |
| 50 | 8  | 0 | 2.285976  | 1.436030  | -0.421123 |
| 51 | 1  | 0 | 2.746587  | 0.863178  | -1.070566 |
| 52 | 6  | 0 | 0.819828  | 3.272754  | -0.175992 |
| 53 | 1  | 0 | 1.615439  | 3.816433  | 0.342697  |
| 54 | 1  | 0 | 0.162567  | 3.995440  | -0.669032 |
| 55 | 1  | 0 | 0.243909  | 2.729742  | 0.578456  |
| 56 | 6  | 0 | 2.377151  | 3.065630  | -2.162040 |
| 57 | 1  | 0 | 1.857764  | 3.849746  | -2.720382 |
| 58 | 1  | 0 | 3.179912  | 3.530115  | -1.580939 |
| 59 | 1  | 0 | 2.821305  | 2.371052  | -2.883365 |

-----

**TS<sub>slj</sub>**

-----

| Center Number | Atomic Number | Atomic Type | Coordinates (Angstroms) |           |           |
|---------------|---------------|-------------|-------------------------|-----------|-----------|
|               |               |             | X                       | Y         | Z         |
| 1             | 6             | 0           | -3.908301               | -2.022690 | 0.545650  |
| 2             | 6             | 0           | -2.425023               | -2.283159 | 0.979564  |
| 3             | 6             | 0           | -2.949982               | -0.346471 | 2.047612  |
| 4             | 6             | 0           | -4.265669               | -0.686525 | 1.272362  |
| 5             | 1             | 0           | -4.022338               | -1.963416 | -0.541795 |

|    |    |   |           |           |           |
|----|----|---|-----------|-----------|-----------|
| 6  | 1  | 0 | -4.536971 | -2.848946 | 0.893385  |
| 7  | 1  | 0 | -4.560734 | 0.108812  | 0.580407  |
| 8  | 1  | 0 | -5.087669 | -0.823979 | 1.982656  |
| 9  | 6  | 0 | -2.474614 | -1.760661 | 2.434212  |
| 10 | 1  | 0 | -1.514633 | -1.747483 | 2.956656  |
| 11 | 1  | 0 | -3.205403 | -2.302796 | 3.043760  |
| 12 | 6  | 0 | -1.659589 | -1.190318 | 0.232407  |
| 13 | 1  | 0 | -1.739864 | -1.172522 | -0.844915 |
| 14 | 6  | 0 | -1.957550 | 0.033982  | 0.958769  |
| 15 | 1  | 0 | -2.067928 | 0.981598  | 0.433168  |
| 16 | 1  | 0 | -2.086015 | -3.305867 | 0.812433  |
| 17 | 1  | 0 | -3.056736 | 0.382003  | 2.850695  |
| 18 | 6  | 0 | 0.389958  | -1.462708 | -0.141818 |
| 19 | 6  | 0 | 0.936040  | -2.748161 | 0.268739  |
| 20 | 6  | 0 | 0.817537  | -0.859680 | -1.298449 |
| 21 | 6  | 0 | 0.595964  | -3.390653 | 1.477505  |
| 22 | 6  | 0 | 1.877214  | -3.392142 | -0.583894 |
| 23 | 6  | 0 | 1.928068  | -1.449327 | -2.066526 |
| 24 | 6  | 0 | 1.110487  | -4.630985 | 1.820754  |
| 25 | 1  | 0 | -0.076503 | -2.887133 | 2.157683  |
| 26 | 6  | 0 | 2.380250  | -4.661411 | -0.236438 |
| 27 | 6  | 0 | 1.996779  | -5.272990 | 0.948596  |
| 28 | 1  | 0 | 0.828444  | -5.094465 | 2.761036  |
| 29 | 1  | 0 | 3.086666  | -5.162608 | -0.885643 |
| 30 | 1  | 0 | 2.403432  | -6.248433 | 1.199728  |
| 31 | 8  | 0 | 2.500064  | -0.825219 | -2.970277 |
| 32 | 7  | 0 | 2.322304  | -2.742910 | -1.732155 |
| 33 | 46 | 0 | 0.046351  | -0.102944 | 1.424268  |
| 34 | 6  | 0 | 3.350362  | -3.360952 | -2.572943 |
| 35 | 1  | 0 | 4.269560  | -3.524196 | -2.000746 |
| 36 | 1  | 0 | 2.993416  | -4.318350 | -2.964802 |
| 37 | 1  | 0 | 3.552464  | -2.675322 | -3.392523 |
| 38 | 35 | 0 | 0.167078  | 1.419606  | 3.428981  |
| 39 | 6  | 0 | 0.171821  | 0.340061  | -1.942227 |
| 40 | 6  | 0 | -0.958419 | 0.041908  | -2.729555 |
| 41 | 6  | 0 | 0.610388  | 1.681092  | -1.861614 |
| 42 | 6  | 0 | -1.718702 | 1.030748  | -3.345572 |
| 43 | 6  | 0 | -0.189171 | 2.666533  | -2.469189 |
| 44 | 6  | 0 | -1.342719 | 2.363553  | -3.186005 |
| 45 | 1  | 0 | -2.586054 | 0.762157  | -3.942155 |
| 46 | 1  | 0 | 0.113120  | 3.706455  | -2.390958 |
| 47 | 1  | 0 | -1.925078 | 3.161488  | -3.638776 |
| 48 | 6  | 0 | 1.945108  | 2.140838  | -1.232340 |

|    |   |   |           |           |           |
|----|---|---|-----------|-----------|-----------|
| 49 | 1 | 0 | -1.231417 | -1.001943 | -2.871835 |
| 50 | 8 | 0 | 2.707192  | 1.041744  | -0.734197 |
| 51 | 1 | 0 | 3.020182  | 0.548097  | -1.514426 |
| 52 | 6 | 0 | 1.710618  | 3.062862  | -0.028993 |
| 53 | 1 | 0 | 2.676661  | 3.388472  | 0.370371  |
| 54 | 1 | 0 | 1.133825  | 3.949259  | -0.311555 |
| 55 | 1 | 0 | 1.173633  | 2.540442  | 0.768058  |
| 56 | 6 | 0 | 2.796431  | 2.851695  | -2.308723 |
| 57 | 1 | 0 | 2.322702  | 3.762435  | -2.687172 |
| 58 | 1 | 0 | 3.762910  | 3.121624  | -1.870474 |
| 59 | 1 | 0 | 2.968233  | 2.181186  | -3.158814 |

-----

**sJ**

-----

| Center Number | Atomic Number | Atomic Type | Coordinates (Angstroms) |           |           |
|---------------|---------------|-------------|-------------------------|-----------|-----------|
|               |               |             | X                       | Y         | Z         |
| 1             | 6             | 0           | -4.783460               | -1.977571 | 1.077612  |
| 2             | 6             | 0           | -3.324179               | -1.845838 | 1.635814  |
| 3             | 6             | 0           | -3.806714               | 0.267329  | 0.967178  |
| 4             | 6             | 0           | -5.117854               | -0.521549 | 0.621041  |
| 5             | 1             | 0           | -4.848019               | -2.705691 | 0.263309  |
| 6             | 1             | 0           | -5.457608               | -2.312453 | 1.873010  |
| 7             | 1             | 0           | -5.371160               | -0.453674 | -0.441154 |
| 8             | 1             | 0           | -5.958688               | -0.107857 | 1.187846  |
| 9             | 6             | 0           | -3.402248               | -0.442902 | 2.280275  |
| 10            | 1             | 0           | -2.451655               | -0.096171 | 2.712725  |
| 11            | 1             | 0           | -4.168839               | -0.368926 | 3.059045  |
| 12            | 6             | 0           | -2.467899               | -1.564990 | 0.405865  |
| 13            | 1             | 0           | -2.056789               | -2.348323 | -0.222595 |
| 14            | 6             | 0           | -2.771333               | -0.275884 | -0.009820 |
| 15            | 1             | 0           | -2.633521               | 0.124675  | -1.005470 |
| 16            | 1             | 0           | -2.999940               | -2.673054 | 2.269670  |
| 17            | 1             | 0           | -3.919830               | 1.352393  | 0.993941  |
| 18            | 6             | 0           | 0.518219                | -1.000428 | -0.413543 |
| 19            | 6             | 0           | 1.053451                | -2.305005 | -0.086468 |
| 20            | 6             | 0           | 0.863929                | -0.332349 | -1.545778 |
| 21            | 6             | 0           | 0.728154                | -3.020958 | 1.084921  |
| 22            | 6             | 0           | 1.941736                | -2.911859 | -1.018603 |
| 23            | 6             | 0           | 1.871207                | -0.927778 | -2.447523 |
| 24            | 6             | 0           | 1.232581                | -4.287736 | 1.330638  |

|    |    |   |           |           |           |
|----|----|---|-----------|-----------|-----------|
| 25 | 1  | 0 | 0.079048  | -2.546654 | 1.812975  |
| 26 | 6  | 0 | 2.444842  | -4.202466 | -0.761263 |
| 27 | 6  | 0 | 2.090894  | -4.880093 | 0.396660  |
| 28 | 1  | 0 | 0.968967  | -4.809886 | 2.245297  |
| 29 | 1  | 0 | 3.120505  | -4.673068 | -1.464027 |
| 30 | 1  | 0 | 2.494354  | -5.872739 | 0.575904  |
| 31 | 8  | 0 | 2.317761  | -0.306209 | -3.421766 |
| 32 | 7  | 0 | 2.319187  | -2.214271 | -2.161327 |
| 33 | 46 | 0 | -0.724031 | -0.214674 | 0.954312  |
| 34 | 6  | 0 | 3.289519  | -2.800965 | -3.088404 |
| 35 | 1  | 0 | 4.236145  | -2.999586 | -2.575686 |
| 36 | 1  | 0 | 2.901408  | -3.735336 | -3.506341 |
| 37 | 1  | 0 | 3.450529  | -2.079081 | -3.885560 |
| 38 | 35 | 0 | 1.153945  | 0.566678  | 2.414371  |
| 39 | 6  | 0 | 0.187669  | 0.902653  | -2.075808 |
| 40 | 6  | 0 | -1.040968 | 0.652052  | -2.718110 |
| 41 | 6  | 0 | 0.683985  | 2.226907  | -2.051142 |
| 42 | 6  | 0 | -1.829185 | 1.669251  | -3.247241 |
| 43 | 6  | 0 | -0.151597 | 3.243614  | -2.549883 |
| 44 | 6  | 0 | -1.390034 | 2.987027  | -3.129671 |
| 45 | 1  | 0 | -2.767455 | 1.434772  | -3.743210 |
| 46 | 1  | 0 | 0.190442  | 4.272486  | -2.498880 |
| 47 | 1  | 0 | -1.990956 | 3.808277  | -3.511374 |
| 48 | 6  | 0 | 2.092696  | 2.637781  | -1.566167 |
| 49 | 1  | 0 | -1.367518 | -0.380959 | -2.810446 |
| 50 | 8  | 0 | 2.923229  | 1.508162  | -1.327577 |
| 51 | 1  | 0 | 3.045992  | 1.065183  | -2.188074 |
| 52 | 6  | 0 | 2.013296  | 3.394476  | -0.233062 |
| 53 | 1  | 0 | 3.020530  | 3.699904  | 0.070154  |
| 54 | 1  | 0 | 1.388820  | 4.289514  | -0.325748 |
| 55 | 1  | 0 | 1.601170  | 2.751941  | 0.548674  |
| 56 | 6  | 0 | 2.790673  | 3.505351  | -2.640080 |
| 57 | 1  | 0 | 2.296463  | 4.467333  | -2.806590 |
| 58 | 1  | 0 | 3.815675  | 3.700176  | -2.308886 |
| 59 | 1  | 0 | 2.827782  | 2.972758  | -3.597815 |

-----

**sK**

-----

| Center Number | Atomic Number | Atomic Type | Coordinates (Angstroms) |   |   |
|---------------|---------------|-------------|-------------------------|---|---|
|               |               |             | X                       | Y | Z |

-----

|    |    |   |           |           |           |
|----|----|---|-----------|-----------|-----------|
| 1  | 6  | 0 | -0.147077 | -0.868026 | -0.546243 |
| 2  | 6  | 0 | 0.221941  | -2.256429 | -0.344992 |
| 3  | 6  | 0 | -1.311652 | -0.546628 | -1.178439 |
| 4  | 6  | 0 | 1.407536  | -2.651035 | 0.315073  |
| 5  | 6  | 0 | -0.664987 | -3.272772 | -0.806949 |
| 6  | 6  | 0 | -2.203257 | -1.581398 | -1.725331 |
| 7  | 6  | 0 | 1.702826  | -3.987644 | 0.552492  |
| 8  | 1  | 0 | 2.122871  | -1.875135 | 0.572723  |
| 9  | 6  | 0 | -0.352160 | -4.626923 | -0.560665 |
| 10 | 6  | 0 | 0.809411  | -4.975176 | 0.116038  |
| 11 | 1  | 0 | 2.634192  | -4.262985 | 1.039352  |
| 12 | 1  | 0 | -1.017493 | -5.409736 | -0.902859 |
| 13 | 1  | 0 | 1.028489  | -6.025662 | 0.287413  |
| 14 | 8  | 0 | -3.243385 | -1.326392 | -2.331085 |
| 15 | 7  | 0 | -1.820448 | -2.919236 | -1.490681 |
| 16 | 46 | 0 | 0.743927  | 0.643716  | 0.355315  |
| 17 | 6  | 0 | -2.704944 | -3.957124 | -2.019610 |
| 18 | 1  | 0 | -2.162927 | -4.605043 | -2.716208 |
| 19 | 1  | 0 | -3.118252 | -4.567862 | -1.209107 |
| 20 | 1  | 0 | -3.513642 | -3.450087 | -2.541960 |
| 21 | 35 | 0 | 2.892566  | 0.387400  | -0.899616 |
| 22 | 6  | 0 | -1.733775 | 0.873736  | -1.422845 |
| 23 | 6  | 0 | -1.656346 | 1.306384  | -2.755351 |
| 24 | 6  | 0 | -2.177249 | 1.782817  | -0.425676 |
| 25 | 6  | 0 | -1.982498 | 2.606229  | -3.128470 |
| 26 | 6  | 0 | -2.502773 | 3.088796  | -0.827480 |
| 27 | 6  | 0 | -2.407396 | 3.504673  | -2.154013 |
| 28 | 1  | 0 | -1.903479 | 2.910420  | -4.168317 |
| 29 | 1  | 0 | -2.843351 | 3.810867  | -0.095606 |
| 30 | 1  | 0 | -2.665953 | 4.526675  | -2.416940 |
| 31 | 6  | 0 | -2.352815 | 1.386822  | 1.054212  |
| 32 | 1  | 0 | -1.326170 | 0.596760  | -3.507275 |
| 33 | 8  | 0 | -1.062170 | 0.954874  | 1.635778  |
| 34 | 1  | 0 | -0.515933 | 1.746979  | 1.918741  |
| 35 | 6  | 0 | 1.830848  | 2.077902  | 2.857569  |
| 36 | 8  | 0 | 1.137039  | 2.355381  | 1.797180  |
| 37 | 8  | 0 | 1.648034  | 1.078114  | 3.583802  |
| 38 | 6  | 0 | 2.933555  | 3.070344  | 3.189251  |
| 39 | 1  | 0 | 2.542183  | 4.092315  | 3.166800  |
| 40 | 1  | 0 | 3.376807  | 2.855153  | 4.163853  |
| 41 | 1  | 0 | 3.705079  | 3.005653  | 2.413120  |
| 42 | 19 | 0 | 0.356879  | -1.063710 | 3.046024  |
| 43 | 6  | 0 | -2.836975 | 2.532624  | 1.955151  |

|    |   |   |           |           |          |
|----|---|---|-----------|-----------|----------|
| 44 | 1 | 0 | -3.836653 | 2.871865  | 1.668601 |
| 45 | 1 | 0 | -2.885821 | 2.173368  | 2.988162 |
| 46 | 1 | 0 | -2.156039 | 3.389449  | 1.924063 |
| 47 | 6 | 0 | -3.305824 | 0.194747  | 1.218010 |
| 48 | 1 | 0 | -3.437624 | -0.036186 | 2.282337 |
| 49 | 1 | 0 | -4.284570 | 0.439010  | 0.794177 |
| 50 | 1 | 0 | -2.932407 | -0.693567 | 0.707685 |

TS<sub>sKL</sub>

| Center Number | Atomic Number | Atomic Type | Coordinates (Angstroms) |           |           |
|---------------|---------------|-------------|-------------------------|-----------|-----------|
|               |               |             | X                       | Y         | Z         |
| 1             | 6             | 0           | 1.940378                | -0.489798 | -1.345961 |
| 2             | 6             | 0           | 2.354810                | -1.854383 | -1.099895 |
| 3             | 6             | 0           | 0.751715                | -0.199453 | -1.939729 |
| 4             | 6             | 0           | 3.574950                | -2.196526 | -0.474802 |
| 5             | 6             | 0           | 1.470336                | -2.903546 | -1.489083 |
| 6             | 6             | 0           | -0.135811               | -1.277137 | -2.414089 |
| 7             | 6             | 0           | 3.906469                | -3.516890 | -0.198479 |
| 8             | 1             | 0           | 4.277929                | -1.395058 | -0.265758 |
| 9             | 6             | 0           | 1.822734                | -4.240406 | -1.204469 |
| 10            | 6             | 0           | 3.017494                | -4.538061 | -0.561911 |
| 11            | 1             | 0           | 4.860610                | -3.754456 | 0.262978  |
| 12            | 1             | 0           | 1.162303                | -5.049284 | -1.490753 |
| 13            | 1             | 0           | 3.265959                | -5.576382 | -0.359860 |
| 14            | 8             | 0           | -1.199825               | -1.068814 | -2.992319 |
| 15            | 7             | 0           | 0.283239                | -2.597404 | -2.139036 |
| 16            | 46            | 0           | 2.902455                | 1.048924  | -0.597462 |
| 17            | 6             | 0           | -0.601052               | -3.672356 | -2.590347 |
| 18            | 1             | 0           | -0.074966               | -4.336044 | -3.284119 |
| 19            | 1             | 0           | -0.967287               | -4.258244 | -1.739940 |
| 20            | 1             | 0           | -1.441128               | -3.202200 | -3.097202 |
| 21            | 35            | 0           | 4.961209                | 0.835553  | -1.984864 |
| 22            | 6             | 0           | 0.296636                | 1.203520  | -2.204904 |
| 23            | 6             | 0           | 0.226425                | 1.578629  | -3.554961 |
| 24            | 6             | 0           | -0.030046               | 2.151214  | -1.199806 |
| 25            | 6             | 0           | -0.133971               | 2.866019  | -3.940330 |
| 26            | 6             | 0           | -0.391820               | 3.442556  | -1.615021 |
| 27            | 6             | 0           | -0.441374               | 3.805290  | -2.960193 |
| 28            | 1             | 0           | -0.170685               | 3.128856  | -4.993706 |

|    |    |   |           |           |           |
|----|----|---|-----------|-----------|-----------|
| 29 | 1  | 0 | -0.643375 | 4.194846  | -0.877700 |
| 30 | 1  | 0 | -0.721567 | 4.819001  | -3.233307 |
| 31 | 6  | 0 | -0.061199 | 1.799191  | 0.303123  |
| 32 | 1  | 0 | 0.466861  | 0.837546  | -4.310311 |
| 33 | 8  | 0 | 1.230249  | 1.285844  | 0.755366  |
| 34 | 1  | 0 | 1.895312  | 2.054448  | 1.235131  |
| 35 | 6  | 0 | 3.671819  | 2.341019  | 2.514794  |
| 36 | 8  | 0 | 2.968494  | 2.781936  | 1.513288  |
| 37 | 8  | 0 | 3.427612  | 1.288874  | 3.136135  |
| 38 | 6  | 0 | 4.864876  | 3.203799  | 2.886973  |
| 39 | 1  | 0 | 4.548911  | 4.242842  | 3.023833  |
| 40 | 1  | 0 | 5.342640  | 2.832245  | 3.795476  |
| 41 | 1  | 0 | 5.586997  | 3.193822  | 2.062459  |
| 42 | 19 | 0 | 2.244678  | -0.782499 | 2.171556  |
| 43 | 6  | 0 | -0.376850 | 3.001072  | 1.209599  |
| 44 | 1  | 0 | -1.381770 | 3.392701  | 1.025267  |
| 45 | 1  | 0 | -0.332069 | 2.673924  | 2.253826  |
| 46 | 1  | 0 | 0.350115  | 3.807703  | 1.079427  |
| 47 | 6  | 0 | -1.102841 | 0.697727  | 0.576069  |
| 48 | 1  | 0 | -1.137638 | 0.476578  | 1.651026  |
| 49 | 1  | 0 | -2.099568 | 1.026304  | 0.264226  |
| 50 | 1  | 0 | -0.869887 | -0.220603 | 0.033378  |

sL

| Center Number | Atomic Number | Atomic Type | Coordinates (Angstroms) |           |           |
|---------------|---------------|-------------|-------------------------|-----------|-----------|
|               |               |             | X                       | Y         | Z         |
| 1             | 6             | 0           | 1.898679                | -0.478865 | -1.540400 |
| 2             | 6             | 0           | 2.363777                | -1.822886 | -1.268490 |
| 3             | 6             | 0           | 0.652844                | -0.238179 | -2.032296 |
| 4             | 6             | 0           | 3.648407                | -2.110373 | -0.754134 |
| 5             | 6             | 0           | 1.469192                | -2.906589 | -1.514906 |
| 6             | 6             | 0           | -0.256243               | -1.355940 | -2.353913 |
| 7             | 6             | 0           | 4.035965                | -3.408636 | -0.448830 |
| 8             | 1             | 0           | 4.344903                | -1.284053 | -0.645104 |
| 9             | 6             | 0           | 1.878580                | -4.220831 | -1.201574 |
| 10            | 6             | 0           | 3.139132                | -4.463121 | -0.670182 |
| 11            | 1             | 0           | 5.034904                | -3.604144 | -0.070343 |
| 12            | 1             | 0           | 1.211709                | -5.055142 | -1.379503 |
| 13            | 1             | 0           | 3.430523                | -5.484950 | -0.442876 |



|    |    |   |           |           |           |
|----|----|---|-----------|-----------|-----------|
| 14 | 8  | 0 | -1.379026 | -1.200010 | -2.827583 |
| 15 | 7  | 0 | 0.216030  | -2.653607 | -2.053982 |
| 16 | 46 | 0 | 2.948901  | 1.107395  | -1.047478 |
| 17 | 6  | 0 | -0.685696 | -3.765132 | -2.357958 |
| 18 | 1  | 0 | -0.216700 | -4.457159 | -3.064864 |
| 19 | 1  | 0 | -0.953897 | -4.310338 | -1.445943 |
| 20 | 1  | 0 | -1.581361 | -3.336200 | -2.802184 |
| 21 | 35 | 0 | 4.875921  | 0.847315  | -2.616480 |
| 22 | 6  | 0 | 0.158016  | 1.138697  | -2.347590 |
| 23 | 6  | 0 | -0.125058 | 1.392263  | -3.698685 |
| 24 | 6  | 0 | 0.006975  | 2.177460  | -1.392786 |
| 25 | 6  | 0 | -0.526293 | 2.649325  | -4.139232 |
| 26 | 6  | 0 | -0.401942 | 3.435101  | -1.864456 |
| 27 | 6  | 0 | -0.660335 | 3.679230  | -3.212816 |
| 28 | 1  | 0 | -0.727500 | 2.818528  | -5.193305 |
| 29 | 1  | 0 | -0.527931 | 4.255538  | -1.169033 |
| 30 | 1  | 0 | -0.968383 | 4.672064  | -3.529829 |
| 31 | 6  | 0 | 0.213823  | 1.954310  | 0.124729  |
| 32 | 1  | 0 | -0.017428 | 0.581708  | -4.411694 |
| 33 | 8  | 0 | 1.537347  | 1.486758  | 0.436049  |
| 34 | 1  | 0 | 2.420300  | 2.331807  | 1.403519  |
| 35 | 6  | 0 | 3.584932  | 2.175643  | 2.975551  |
| 36 | 8  | 0 | 3.084698  | 2.877981  | 1.976067  |
| 37 | 8  | 0 | 3.295487  | 1.001100  | 3.209971  |
| 38 | 6  | 0 | 4.569167  | 2.959901  | 3.811064  |
| 39 | 1  | 0 | 4.117687  | 3.901586  | 4.138629  |
| 40 | 1  | 0 | 4.883354  | 2.370885  | 4.673565  |
| 41 | 1  | 0 | 5.442416  | 3.215563  | 3.200749  |
| 42 | 19 | 0 | 2.083252  | -0.767529 | 1.738493  |
| 43 | 6  | 0 | 0.002833  | 3.240569  | 0.948380  |
| 44 | 1  | 0 | -1.017733 | 3.627287  | 0.860454  |
| 45 | 1  | 0 | 0.182054  | 3.014625  | 2.004863  |
| 46 | 1  | 0 | 0.705994  | 4.024188  | 0.651095  |
| 47 | 6  | 0 | -0.811980 | 0.909578  | 0.633389  |
| 48 | 1  | 0 | -0.687804 | 0.766840  | 1.716929  |
| 49 | 1  | 0 | -1.840199 | 1.245502  | 0.460869  |
| 50 | 1  | 0 | -0.692801 | -0.052624 | 0.127693  |

-----

sN

-----

| Center Number | Atomic Number | Atomic Type | Coordinates (Angstroms) |   |   |
|---------------|---------------|-------------|-------------------------|---|---|
|               |               |             | X                       | Y | Z |

---

|    |    |   |           |           |           |
|----|----|---|-----------|-----------|-----------|
| 1  | 6  | 0 | -0.483103 | -1.342546 | -0.324494 |
| 2  | 6  | 0 | -0.264739 | -2.768517 | -0.479773 |
| 3  | 6  | 0 | -1.522519 | -0.699728 | -0.921500 |
| 4  | 6  | 0 | 0.785869  | -3.463783 | 0.160506  |
| 5  | 6  | 0 | -1.135462 | -3.497556 | -1.335514 |
| 6  | 6  | 0 | -2.477596 | -1.474977 | -1.755388 |
| 7  | 6  | 0 | 0.993439  | -4.819430 | -0.045001 |
| 8  | 1  | 0 | 1.448696  | -2.925664 | 0.835589  |
| 9  | 6  | 0 | -0.917538 | -4.875804 | -1.533445 |
| 10 | 6  | 0 | 0.135889  | -5.521948 | -0.899645 |
| 11 | 1  | 0 | 1.812586  | -5.326637 | 0.455267  |
| 12 | 1  | 0 | -1.573833 | -5.444328 | -2.180161 |
| 13 | 1  | 0 | 0.285046  | -6.584717 | -1.069675 |
| 14 | 8  | 0 | -3.476283 | -0.975274 | -2.270638 |
| 15 | 7  | 0 | -2.195909 | -2.840194 | -1.944560 |
| 16 | 46 | 0 | 0.975833  | -0.489300 | 0.683467  |
| 17 | 6  | 0 | -3.117012 | -3.588726 | -2.800022 |
| 18 | 1  | 0 | -2.578700 | -4.033685 | -3.643353 |
| 19 | 1  | 0 | -3.613900 | -4.382900 | -2.232189 |
| 20 | 1  | 0 | -3.860011 | -2.884114 | -3.166596 |
| 21 | 35 | 0 | 3.450784  | -0.351068 | 1.684741  |
| 22 | 6  | 0 | -1.801776 | 0.765245  | -0.834615 |
| 23 | 6  | 0 | -1.970733 | 1.442193  | -2.055903 |
| 24 | 6  | 0 | -1.929509 | 1.490302  | 0.376018  |
| 25 | 6  | 0 | -2.262002 | 2.800135  | -2.111314 |
| 26 | 6  | 0 | -2.241541 | 2.856820  | 0.293989  |
| 27 | 6  | 0 | -2.412201 | 3.510950  | -0.923554 |
| 28 | 1  | 0 | -2.381246 | 3.291393  | -3.073063 |
| 29 | 1  | 0 | -2.355338 | 3.437518  | 1.201194  |
| 30 | 1  | 0 | -2.656319 | 4.569943  | -0.937934 |
| 31 | 6  | 0 | -1.644757 | 0.848161  | 1.748112  |
| 32 | 1  | 0 | -1.881236 | 0.879914  | -2.978260 |
| 33 | 8  | 0 | -0.218361 | 0.670600  | 1.871160  |
| 34 | 1  | 0 | 0.517804  | 2.146131  | 1.501690  |
| 35 | 6  | 0 | 1.579063  | 3.563093  | 2.299506  |
| 36 | 8  | 0 | 0.982307  | 3.011202  | 1.255314  |
| 37 | 8  | 0 | 1.539287  | 3.099819  | 3.438315  |
| 38 | 6  | 0 | 2.335601  | 4.818894  | 1.942077  |
| 39 | 1  | 0 | 1.741593  | 5.449047  | 1.274426  |
| 40 | 1  | 0 | 2.604857  | 5.363749  | 2.847931  |
| 41 | 1  | 0 | 3.248687  | 4.539430  | 1.403677  |
| 42 | 19 | 0 | 1.415748  | 0.560523  | 4.028318  |

|    |   |   |           |           |          |
|----|---|---|-----------|-----------|----------|
| 43 | 6 | 0 | -1.994320 | 1.783879  | 2.931054 |
| 44 | 1 | 0 | -3.053768 | 2.060675  | 2.919448 |
| 45 | 1 | 0 | -1.808322 | 1.245534  | 3.869070 |
| 46 | 1 | 0 | -1.389564 | 2.694037  | 2.938267 |
| 47 | 6 | 0 | -2.423777 | -0.480615 | 1.987006 |
| 48 | 1 | 0 | -3.011712 | -0.790297 | 1.122020 |
| 49 | 1 | 0 | -1.722607 | -1.286110 | 2.224738 |
| 50 | 1 | 0 | -3.116378 | -0.376859 | 2.829997 |

**sO**

| Center Number | Atomic Number | Atomic Type | Coordinates (Angstroms) |           |           |
|---------------|---------------|-------------|-------------------------|-----------|-----------|
|               |               |             | X                       | Y         | Z         |
| 1             | 6             | 0           | -0.127843               | -0.447429 | 0.337178  |
| 2             | 6             | 0           | 0.236186                | -1.820342 | 0.603751  |
| 3             | 6             | 0           | -1.391580               | -0.094925 | -0.031657 |
| 4             | 6             | 0           | 1.521535                | -2.206095 | 1.036977  |
| 5             | 6             | 0           | -0.751277               | -2.829193 | 0.420641  |
| 6             | 6             | 0           | -2.423103               | -1.135294 | -0.235599 |
| 7             | 6             | 0           | 1.841384                | -3.534413 | 1.274697  |
| 8             | 1             | 0           | 2.257761                | -1.424015 | 1.195844  |
| 9             | 6             | 0           | -0.413440               | -4.177254 | 0.658564  |
| 10            | 6             | 0           | 0.865777                | -4.519842 | 1.078140  |
| 11            | 1             | 0           | 2.836372                | -3.805070 | 1.615534  |
| 12            | 1             | 0           | -1.151442               | -4.957770 | 0.521479  |
| 13            | 1             | 0           | 1.101146                | -5.565295 | 1.259210  |
| 14            | 8             | 0           | -3.573121               | -0.890552 | -0.598173 |
| 15            | 7             | 0           | -2.028786               | -2.467140 | 0.011701  |
| 16            | 46            | 0           | 1.213423                | 0.989041  | 0.547585  |
| 17            | 6             | 0           | -3.054853               | -3.495202 | -0.156406 |
| 18            | 1             | 0           | -2.762930               | -4.211563 | -0.932418 |
| 19            | 1             | 0           | -3.217741               | -4.033322 | 0.783450  |
| 20            | 1             | 0           | -3.970231               | -2.987411 | -0.452541 |
| 21            | 6             | 0           | -1.803074               | 1.317942  | -0.298964 |
| 22            | 6             | 0           | -2.353360               | 1.578138  | -1.565622 |
| 23            | 6             | 0           | -1.638989               | 2.386568  | 0.623285  |
| 24            | 6             | 0           | -2.720703               | 2.860812  | -1.960454 |
| 25            | 6             | 0           | -2.026565               | 3.668132  | 0.200098  |
| 26            | 6             | 0           | -2.553173               | 3.915106  | -1.067345 |
| 27            | 1             | 0           | -3.138171               | 3.028738  | -2.949911 |

|    |   |   |           |           |           |
|----|---|---|-----------|-----------|-----------|
| 28 | 1 | 0 | -1.921950 | 4.506477  | 0.877440  |
| 29 | 1 | 0 | -2.836343 | 4.927340  | -1.345396 |
| 30 | 6 | 0 | -1.085149 | 2.182233  | 2.057637  |
| 31 | 1 | 0 | -2.501967 | 0.746727  | -2.246380 |
| 32 | 8 | 0 | 0.263672  | 1.738541  | 2.069481  |
| 33 | 6 | 0 | 2.140522  | -0.123860 | -2.099523 |
| 34 | 8 | 0 | 2.535039  | 0.390008  | -1.035717 |
| 35 | 1 | 0 | 1.093832  | -0.419531 | -2.234902 |
| 36 | 7 | 0 | 2.935286  | -0.363379 | -3.152100 |
| 37 | 6 | 0 | 2.415646  | -0.974607 | -4.367599 |
| 38 | 1 | 0 | 2.558931  | -0.304342 | -5.223206 |
| 39 | 1 | 0 | 2.933427  | -1.919125 | -4.571826 |
| 40 | 1 | 0 | 1.348032  | -1.176306 | -4.254286 |
| 41 | 6 | 0 | 4.353302  | -0.021256 | -3.122744 |
| 42 | 1 | 0 | 4.585387  | 0.432331  | -2.159969 |
| 43 | 1 | 0 | 4.960105  | -0.923735 | -3.259763 |
| 44 | 1 | 0 | 4.584569  | 0.685602  | -3.927780 |
| 45 | 6 | 0 | -1.037373 | 3.496671  | 2.869769  |
| 46 | 1 | 0 | -2.032042 | 3.929403  | 3.026952  |
| 47 | 1 | 0 | -0.604294 | 3.268593  | 3.848044  |
| 48 | 1 | 0 | -0.392360 | 4.235555  | 2.384862  |
| 49 | 6 | 0 | -1.978639 | 1.193265  | 2.845518  |
| 50 | 1 | 0 | -2.997558 | 1.584207  | 2.953906  |
| 51 | 1 | 0 | -2.037122 | 0.218136  | 2.360068  |
| 52 | 1 | 0 | -1.550558 | 1.048369  | 3.843388  |

-----

**TS<sub>sOP</sub>**

-----

| Center Number | Atomic Number | Atomic Type | Coordinates (Angstroms) |           |           |
|---------------|---------------|-------------|-------------------------|-----------|-----------|
|               |               |             | X                       | Y         | Z         |
| 1             | 6             | 0           | -0.335403               | -0.441411 | 0.789436  |
| 2             | 6             | 0           | -0.069663               | -1.767622 | 1.298078  |
| 3             | 6             | 0           | -1.460498               | -0.154229 | 0.054884  |
| 4             | 6             | 0           | 1.022595                | -2.065239 | 2.134337  |
| 5             | 6             | 0           | -0.960329               | -2.809713 | 0.922965  |
| 6             | 6             | 0           | -2.352747               | -1.230818 | -0.373944 |
| 7             | 6             | 0           | 1.247852                | -3.353141 | 2.596001  |
| 8             | 1             | 0           | 1.682807                | -1.250727 | 2.415651  |
| 9             | 6             | 0           | -0.713068               | -4.117676 | 1.390280  |
| 10            | 6             | 0           | 0.373695                | -4.379241 | 2.214846  |

|    |    |   |           |           |           |
|----|----|---|-----------|-----------|-----------|
| 11 | 1  | 0 | 2.092230  | -3.561731 | 3.246151  |
| 12 | 1  | 0 | -1.374273 | -4.929340 | 1.113443  |
| 13 | 1  | 0 | 0.538756  | -5.394689 | 2.565439  |
| 14 | 8  | 0 | -3.330307 | -1.065753 | -1.109567 |
| 15 | 7  | 0 | -2.043838 | -2.529383 | 0.098657  |
| 16 | 46 | 0 | 1.215095  | 0.830172  | 0.675154  |
| 17 | 6  | 0 | -2.946948 | -3.604988 | -0.301722 |
| 18 | 1  | 0 | -2.407789 | -4.378066 | -0.861173 |
| 19 | 1  | 0 | -3.417464 | -4.064142 | 0.574927  |
| 20 | 1  | 0 | -3.711433 | -3.159624 | -0.935052 |
| 21 | 6  | 0 | -1.789177 | 1.259011  | -0.252310 |
| 22 | 6  | 0 | -2.294684 | 1.627882  | -1.509962 |
| 23 | 6  | 0 | -1.567420 | 2.260191  | 0.730081  |
| 24 | 6  | 0 | -2.559772 | 2.960356  | -1.818951 |
| 25 | 6  | 0 | -1.840537 | 3.592618  | 0.394206  |
| 26 | 6  | 0 | -2.325222 | 3.948932  | -0.865482 |
| 27 | 1  | 0 | -2.949871 | 3.221539  | -2.799594 |
| 28 | 1  | 0 | -1.684975 | 4.375029  | 1.128456  |
| 29 | 1  | 0 | -2.526475 | 4.993223  | -1.090819 |
| 30 | 6  | 0 | -1.153677 | 1.884424  | 2.169487  |
| 31 | 1  | 0 | -2.496814 | 0.849287  | -2.235241 |
| 32 | 8  | 0 | -0.120409 | 0.884941  | 2.216241  |
| 33 | 6  | 0 | 1.923954  | 0.183955  | -2.139539 |
| 34 | 8  | 0 | 2.442710  | 0.547216  | -1.067215 |
| 35 | 1  | 0 | 0.877089  | -0.141896 | -2.184725 |
| 36 | 7  | 0 | 2.574679  | 0.149976  | -3.311963 |
| 37 | 6  | 0 | 1.911818  | -0.292106 | -4.531001 |
| 38 | 1  | 0 | 1.916319  | 0.508823  | -5.279600 |
| 39 | 1  | 0 | 2.424299  | -1.166053 | -4.950281 |
| 40 | 1  | 0 | 0.876159  | -0.562499 | -4.312529 |
| 41 | 6  | 0 | 3.970517  | 0.561335  | -3.412033 |
| 42 | 1  | 0 | 4.315140  | 0.871399  | -2.426233 |
| 43 | 1  | 0 | 4.583825  | -0.273511 | -3.770383 |
| 44 | 1  | 0 | 4.065867  | 1.396768  | -4.115185 |
| 45 | 6  | 0 | -0.601422 | 3.079662  | 2.968192  |
| 46 | 1  | 0 | -1.371180 | 3.827184  | 3.190386  |
| 47 | 1  | 0 | -0.213074 | 2.703412  | 3.919268  |
| 48 | 1  | 0 | 0.220214  | 3.565065  | 2.430603  |
| 49 | 6  | 0 | -2.371616 | 1.293856  | 2.914767  |
| 50 | 1  | 0 | -3.181292 | 2.029232  | 2.980415  |
| 51 | 1  | 0 | -2.753151 | 0.408363  | 2.399882  |
| 52 | 1  | 0 | -2.074467 | 1.003963  | 3.928570  |

**sP**

---

| Center Number | Atomic Number | Atomic Type | Coordinates (Angstroms) |           |           |
|---------------|---------------|-------------|-------------------------|-----------|-----------|
|               |               |             | X                       | Y         | Z         |
| 1             | 6             | 0           | -0.582087               | -0.209625 | 1.269080  |
| 2             | 6             | 0           | -0.315952               | -1.540689 | 1.807036  |
| 3             | 6             | 0           | -1.529262               | -0.011592 | 0.232896  |
| 4             | 6             | 0           | 0.576492                | -1.740289 | 2.872451  |
| 5             | 6             | 0           | -1.000333               | -2.648450 | 1.246068  |
| 6             | 6             | 0           | -2.232808               | -1.185514 | -0.334873 |
| 7             | 6             | 0           | 0.826604                | -3.014227 | 3.366504  |
| 8             | 1             | 0           | 1.067391                | -0.871489 | 3.296431  |
| 9             | 6             | 0           | -0.733395               | -3.933701 | 1.753160  |
| 10            | 6             | 0           | 0.171331                | -4.110451 | 2.796675  |
| 11            | 1             | 0           | 1.523560                | -3.154928 | 4.187643  |
| 12            | 1             | 0           | -1.234912               | -4.799449 | 1.339074  |
| 13            | 1             | 0           | 0.357760                | -5.113801 | 3.170337  |
| 14            | 8             | 0           | -3.080316               | -1.102602 | -1.226544 |
| 15            | 7             | 0           | -1.929010               | -2.446622 | 0.223443  |
| 16            | 46            | 0           | 0.473241                | -0.156887 | -0.609540 |
| 17            | 6             | 0           | -2.626225               | -3.597024 | -0.343622 |
| 18            | 1             | 0           | -1.915199               | -4.294068 | -0.802877 |
| 19            | 1             | 0           | -3.192821               | -4.125655 | 0.430847  |
| 20            | 1             | 0           | -3.308791               | -3.219582 | -1.101688 |
| 21            | 6             | 0           | -2.037370               | 1.367369  | 0.012573  |
| 22            | 6             | 0           | -2.722033               | 1.753963  | -1.153546 |
| 23            | 6             | 0           | -1.804983               | 2.332501  | 1.019457  |
| 24            | 6             | 0           | -3.171370               | 3.062389  | -1.315336 |
| 25            | 6             | 0           | -2.260473               | 3.641196  | 0.838548  |
| 26            | 6             | 0           | -2.941358               | 4.013350  | -0.321263 |
| 27            | 1             | 0           | -3.703037               | 3.337263  | -2.222921 |
| 28            | 1             | 0           | -2.091068               | 4.383964  | 1.612202  |
| 29            | 1             | 0           | -3.288758               | 5.036079  | -0.442039 |
| 30            | 6             | 0           | -1.129754               | 1.901103  | 2.318971  |
| 31            | 1             | 0           | -2.907812               | 1.009688  | -1.915602 |
| 32            | 8             | 0           | -0.167324               | 0.839003  | 2.058945  |
| 33            | 6             | 0           | 1.874755                | -0.121565 | -3.379977 |
| 34            | 8             | 0           | 2.034443                | -0.134410 | -2.152975 |
| 35            | 1             | 0           | 0.874577                | -0.126759 | -3.835024 |
| 36            | 7             | 0           | 2.883038                | -0.099987 | -4.275197 |

---

|    |   |   |           |           |           |
|----|---|---|-----------|-----------|-----------|
| 37 | 6 | 0 | 2.626538  | -0.084841 | -5.706317 |
| 38 | 1 | 0 | 3.051384  | 0.816329  | -6.165360 |
| 39 | 1 | 0 | 3.072876  | -0.963546 | -6.187947 |
| 40 | 1 | 0 | 1.549196  | -0.095504 | -5.889787 |
| 41 | 6 | 0 | 4.272615  | -0.088997 | -3.836377 |
| 42 | 1 | 0 | 4.292438  | -0.100321 | -2.747010 |
| 43 | 1 | 0 | 4.798579  | -0.970115 | -4.222926 |
| 44 | 1 | 0 | 4.778293  | 0.811813  | -4.204132 |
| 45 | 6 | 0 | -0.271002 | 2.995064  | 2.958553  |
| 46 | 1 | 0 | -0.886043 | 3.811995  | 3.346611  |
| 47 | 1 | 0 | 0.288627  | 2.565356  | 3.795192  |
| 48 | 1 | 0 | 0.440897  | 3.400027  | 2.233442  |
| 49 | 6 | 0 | -2.176725 | 1.373711  | 3.317774  |
| 50 | 1 | 0 | -2.890515 | 2.165149  | 3.570015  |
| 51 | 1 | 0 | -2.740461 | 0.538843  | 2.889419  |
| 52 | 1 | 0 | -1.686812 | 1.030753  | 4.235825  |

3a

| Center Number | Atomic Number | Atomic Type | Coordinates (Angstroms) |           |           |
|---------------|---------------|-------------|-------------------------|-----------|-----------|
|               |               |             | X                       | Y         | Z         |
| 1             | 6             | 0           | -0.309481               | -0.479282 | 0.078889  |
| 2             | 6             | 0           | 1.013255                | -0.486447 | -0.354360 |
| 3             | 6             | 0           | 1.740379                | 0.701906  | -0.392496 |
| 4             | 6             | 0           | 1.201947                | 1.945387  | -0.009483 |
| 5             | 6             | 0           | -0.136229               | 1.898175  | 0.412097  |
| 6             | 6             | 0           | -0.888785               | 0.727786  | 0.465896  |
| 7             | 1             | 0           | -0.891623               | -1.395355 | 0.118958  |
| 8             | 1             | 0           | 1.487316                | -1.414409 | -0.661347 |
| 9             | 1             | 0           | 2.768504                | 0.661275  | -0.730355 |
| 10            | 1             | 0           | -1.917084               | 0.762316  | 0.807356  |
| 11            | 6             | 0           | 2.068667                | 3.230845  | -0.095697 |
| 12            | 8             | 0           | 2.057188                | 3.943829  | 1.142525  |
| 13            | 1             | 0           | 1.161123                | 4.283161  | 1.296512  |
| 14            | 35            | 0           | -1.155301               | 3.520863  | 0.996199  |
| 15            | 6             | 0           | 1.578712                | 4.123070  | -1.255803 |
| 16            | 1             | 0           | 1.663604                | 3.598382  | -2.214080 |
| 17            | 1             | 0           | 0.535221                | 4.423019  | -1.128684 |
| 18            | 1             | 0           | 2.194413                | 5.028041  | -1.296532 |
| 19            | 6             | 0           | 3.558763                | 2.923777  | -0.303507 |

|    |   |   |          |          |           |
|----|---|---|----------|----------|-----------|
| 20 | 1 | 0 | 4.102053 | 3.870982 | -0.249755 |
| 21 | 1 | 0 | 3.940392 | 2.270807 | 0.487116  |
| 22 | 1 | 0 | 3.759613 | 2.469667 | -1.278178 |

---



## 8. NMR Charts

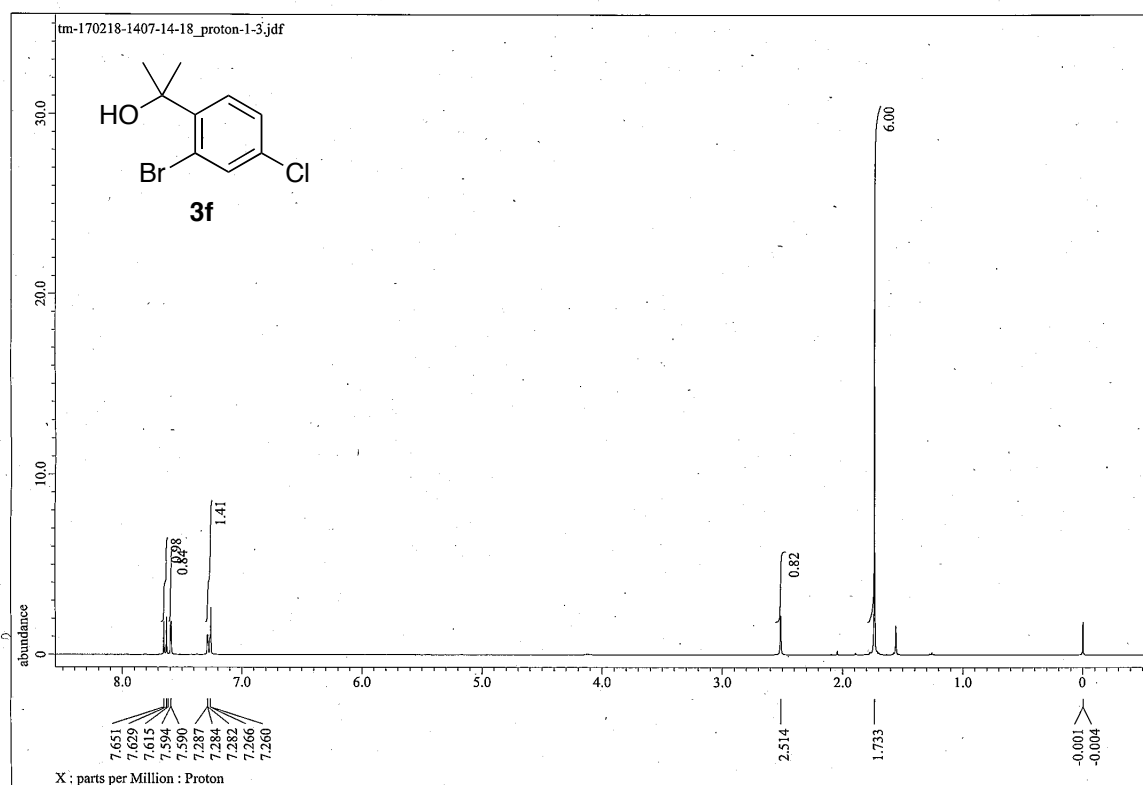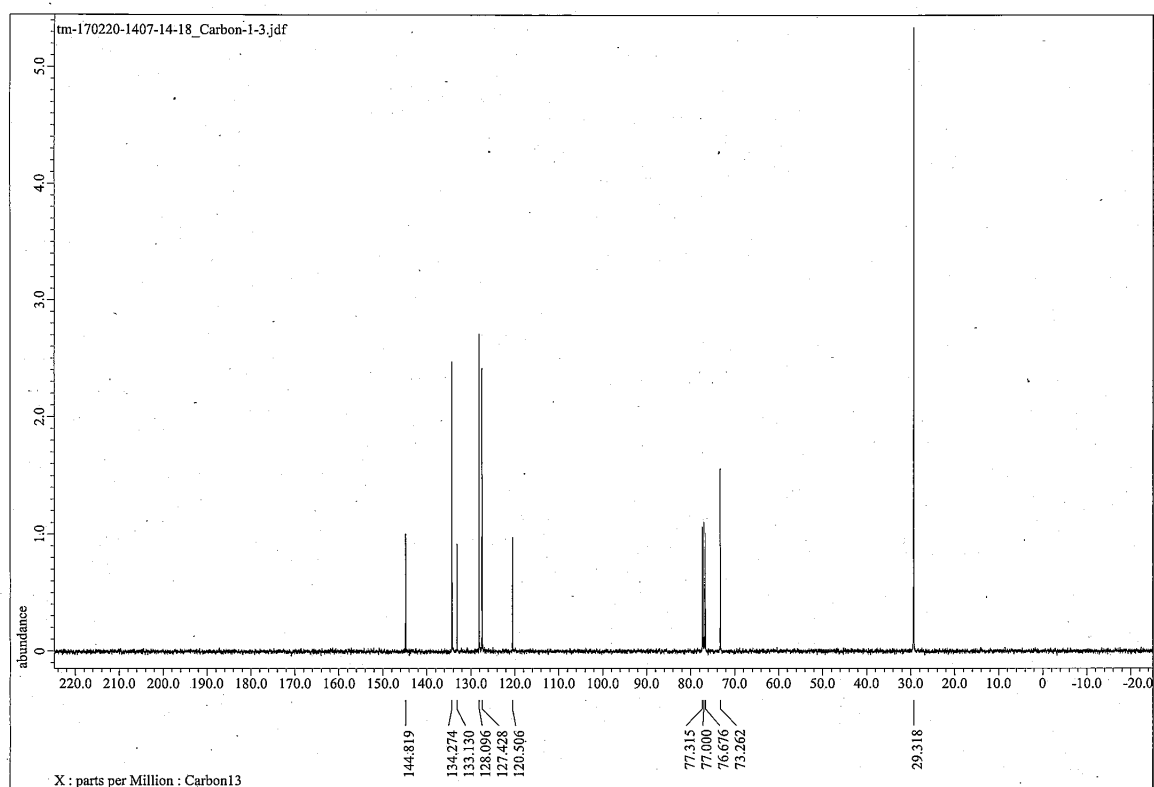

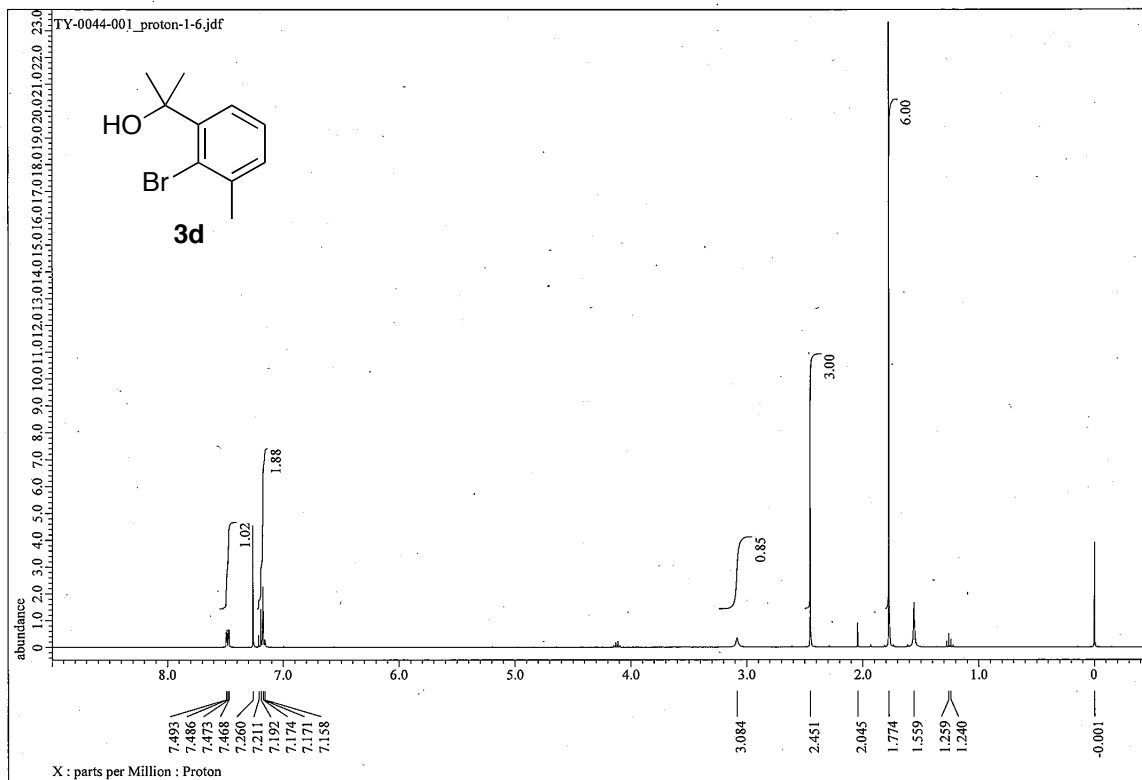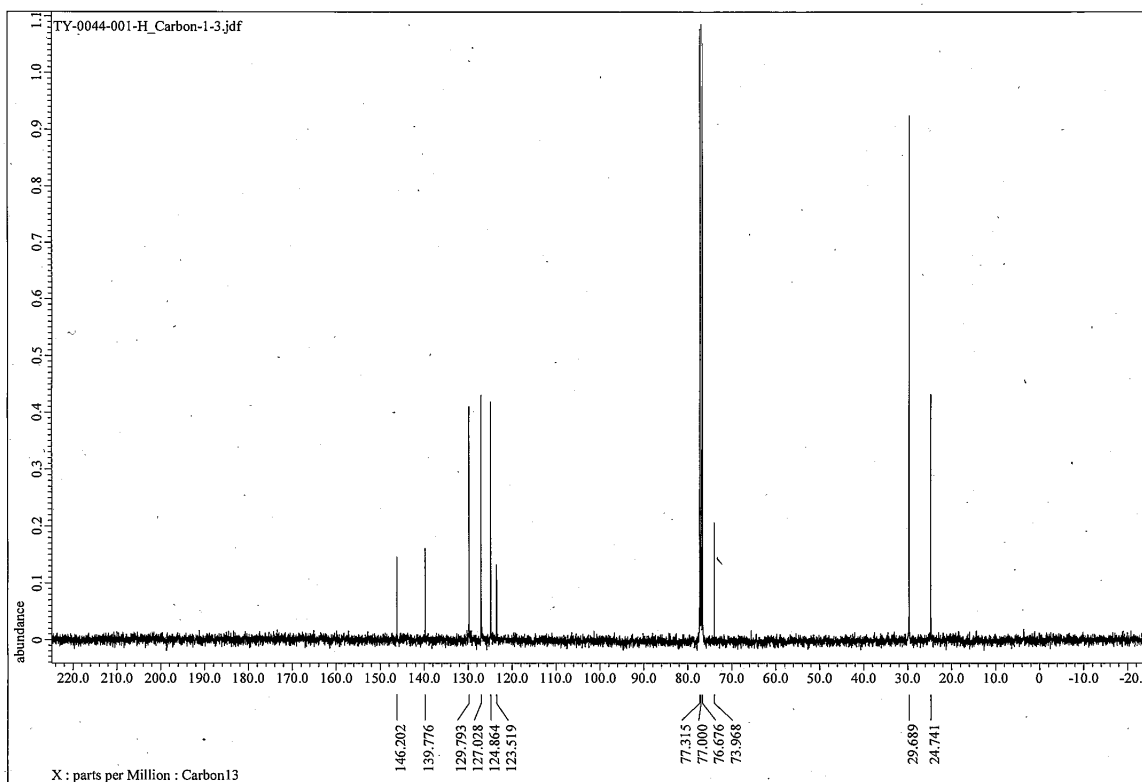

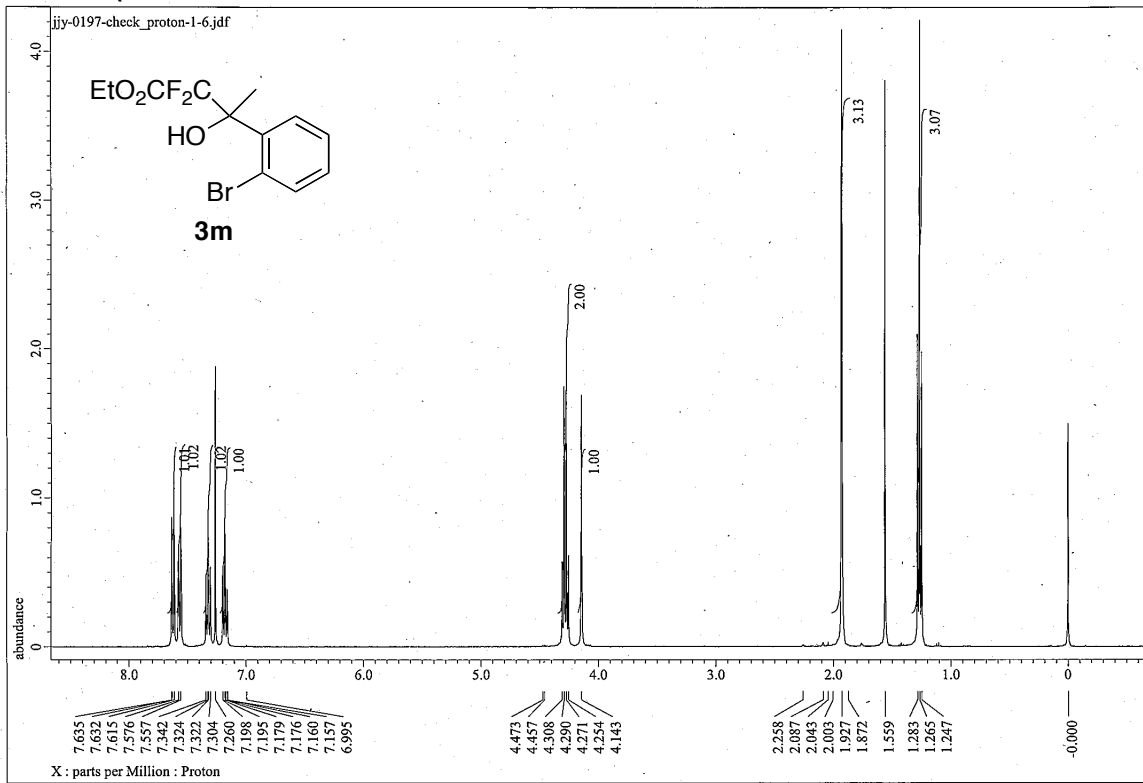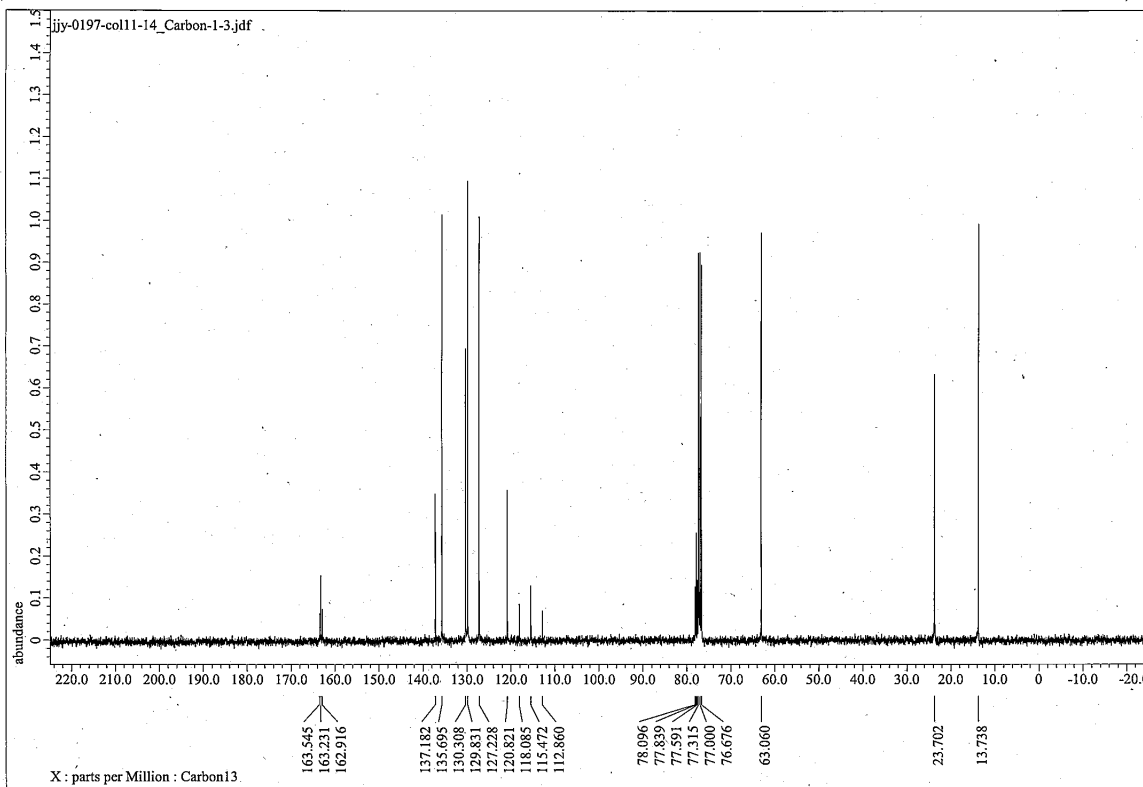

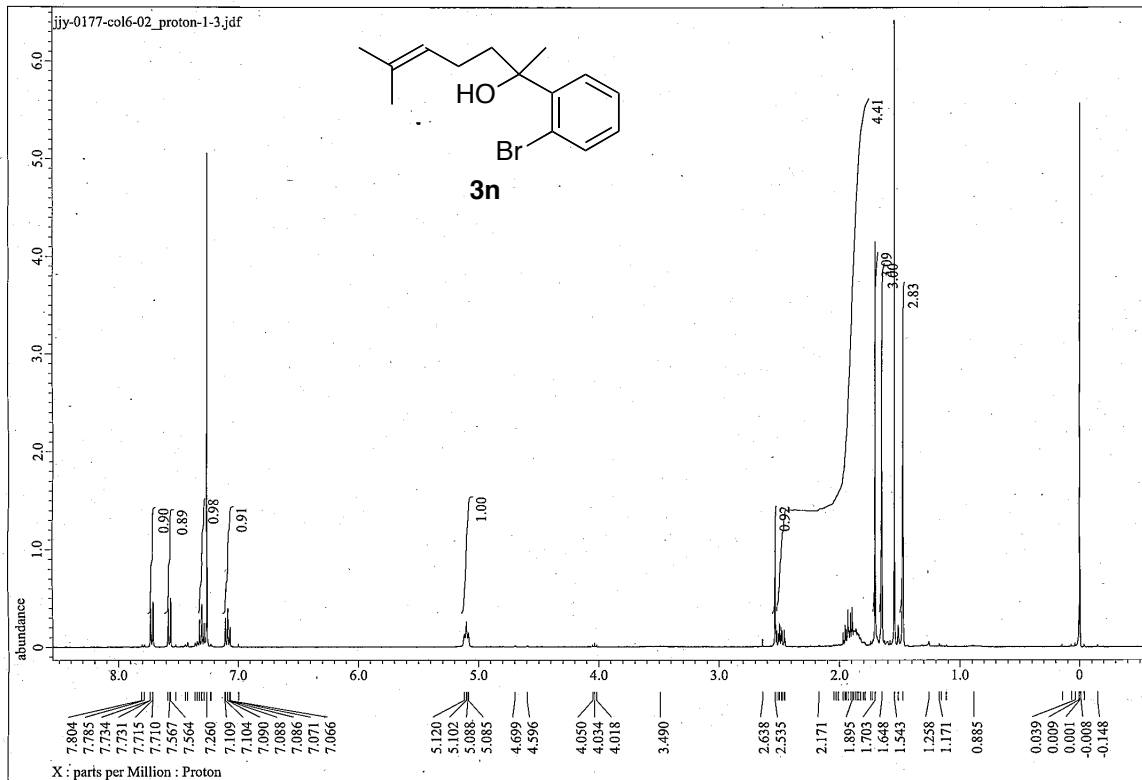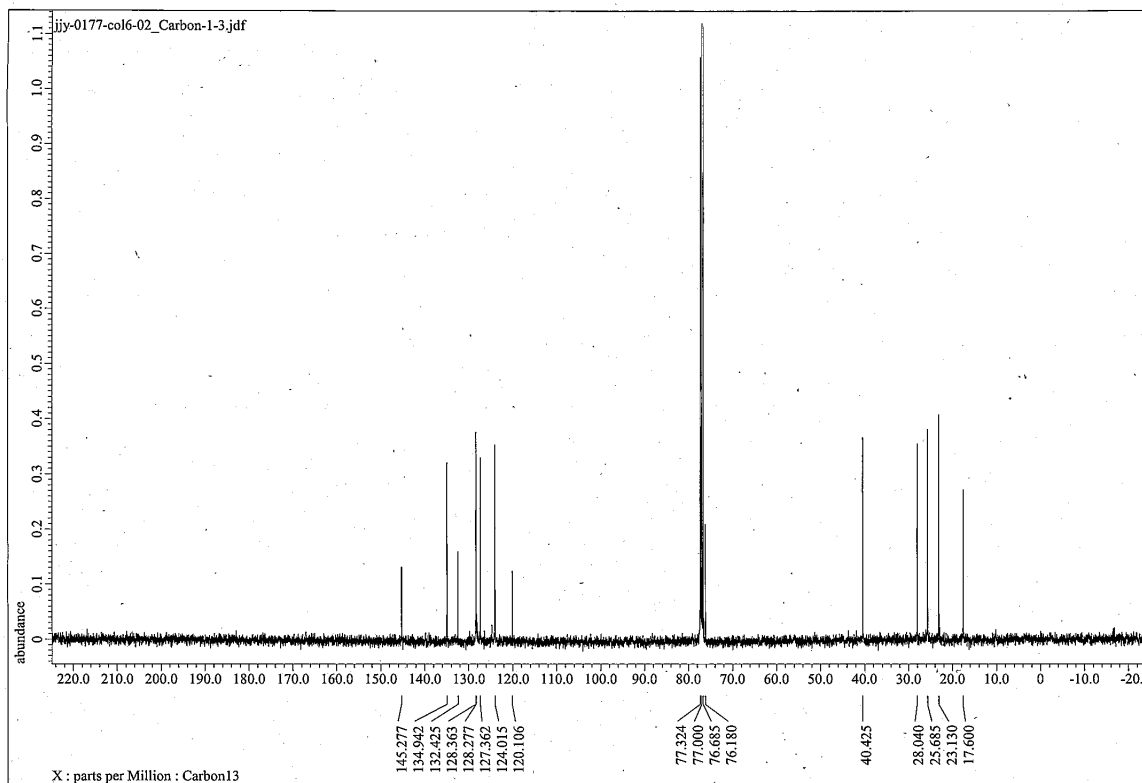

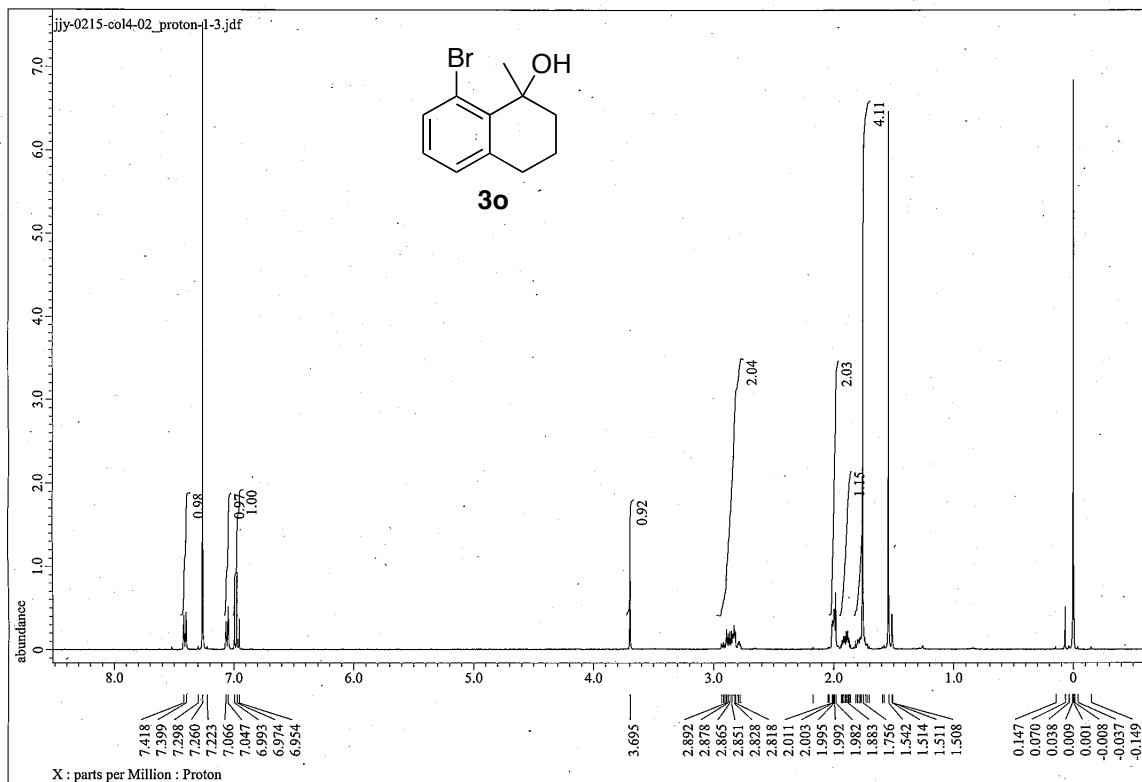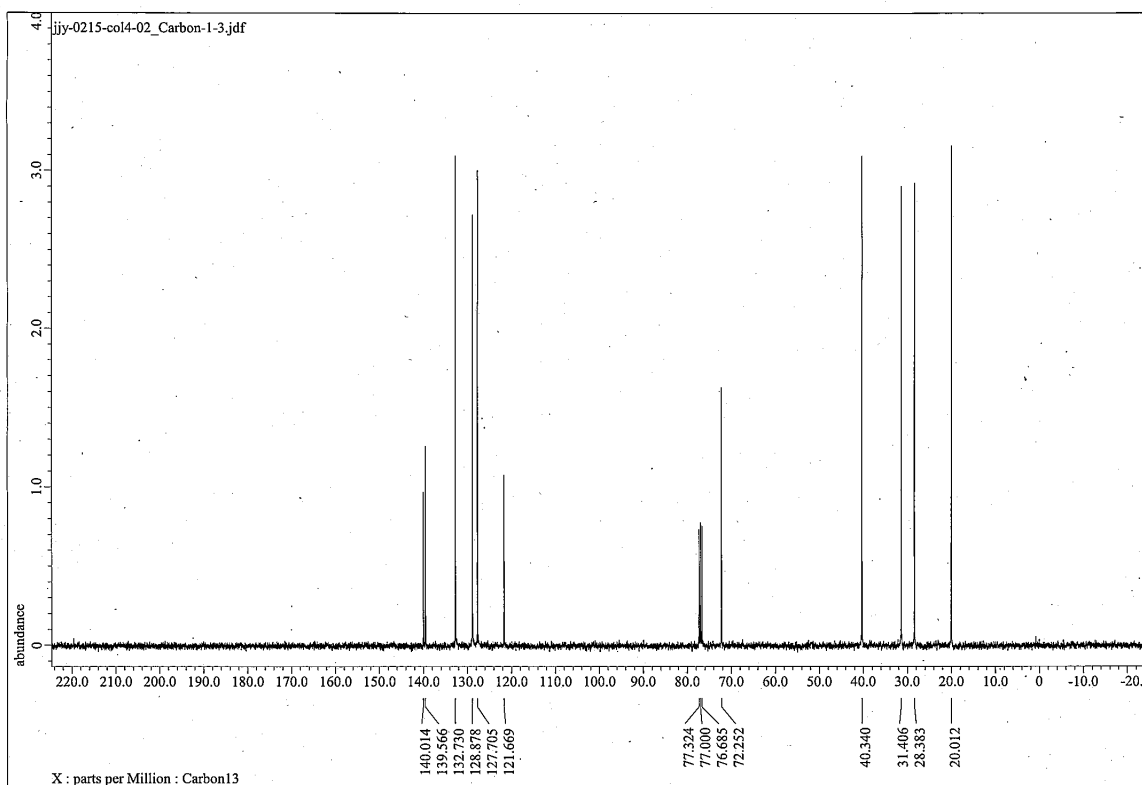

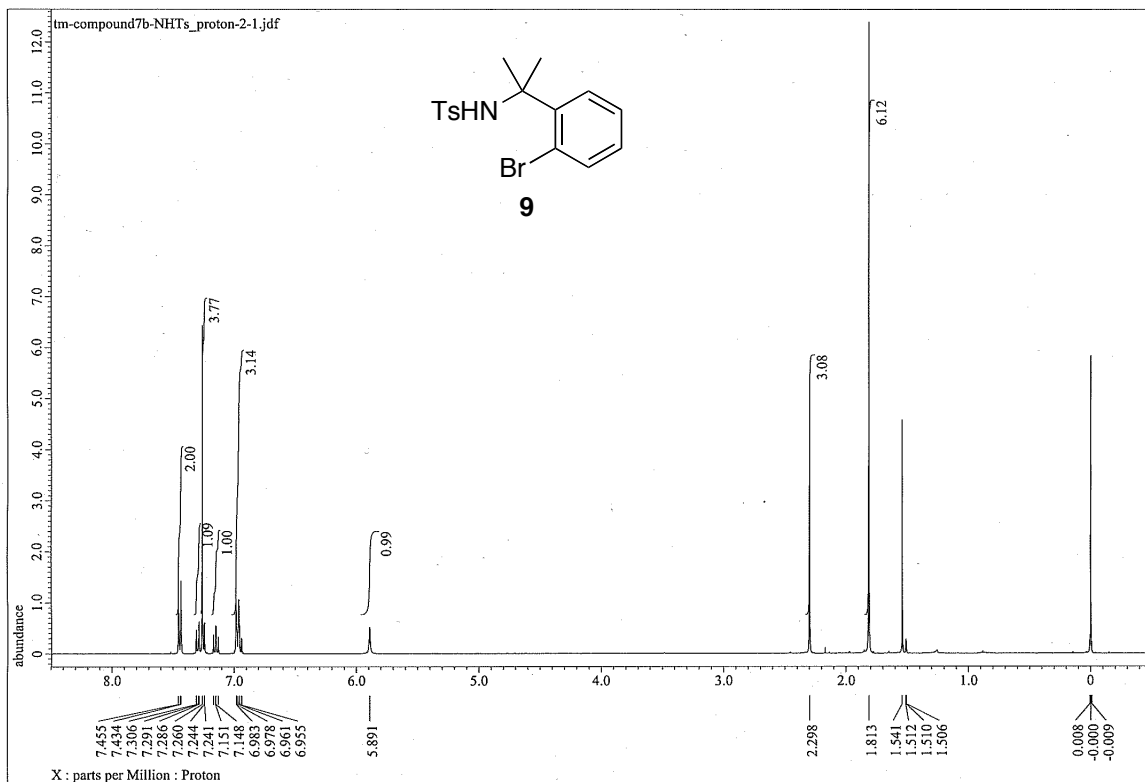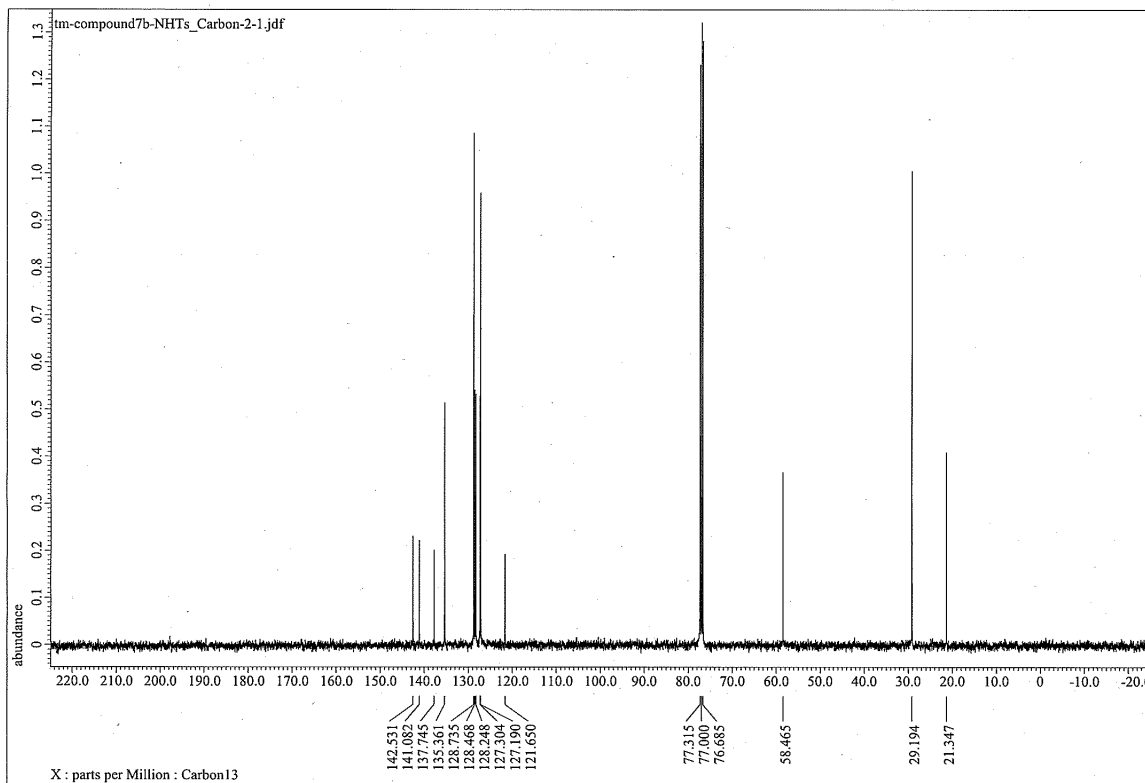

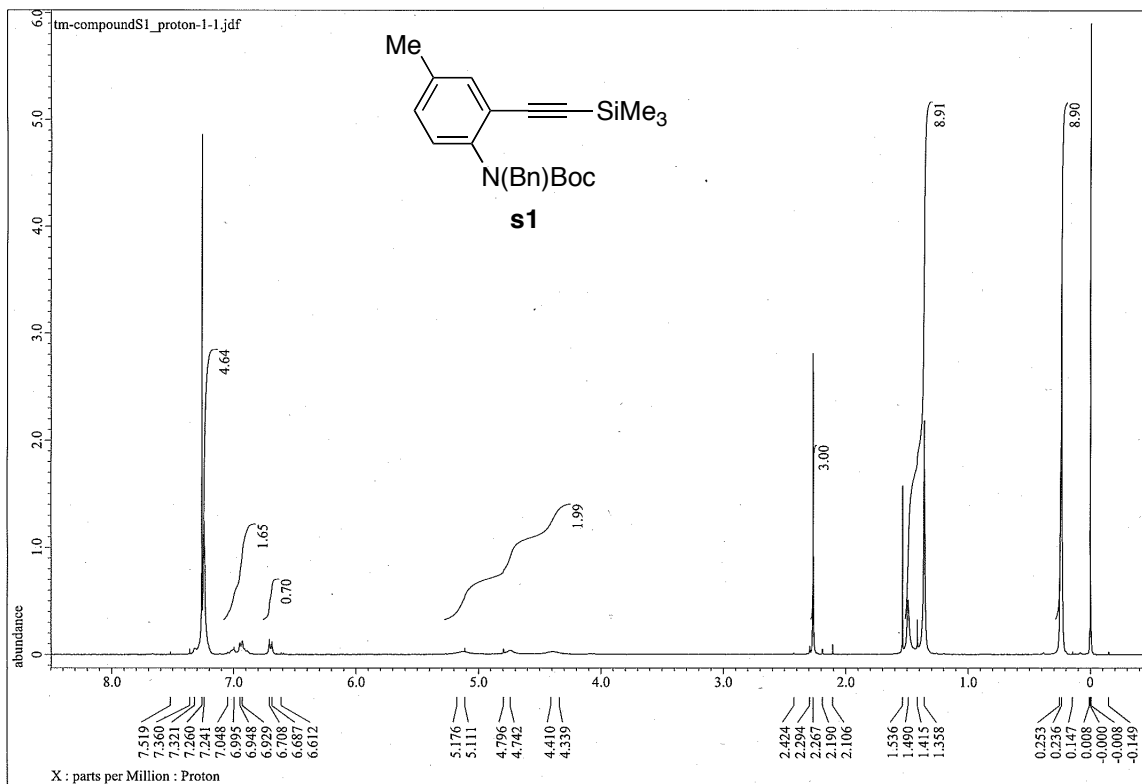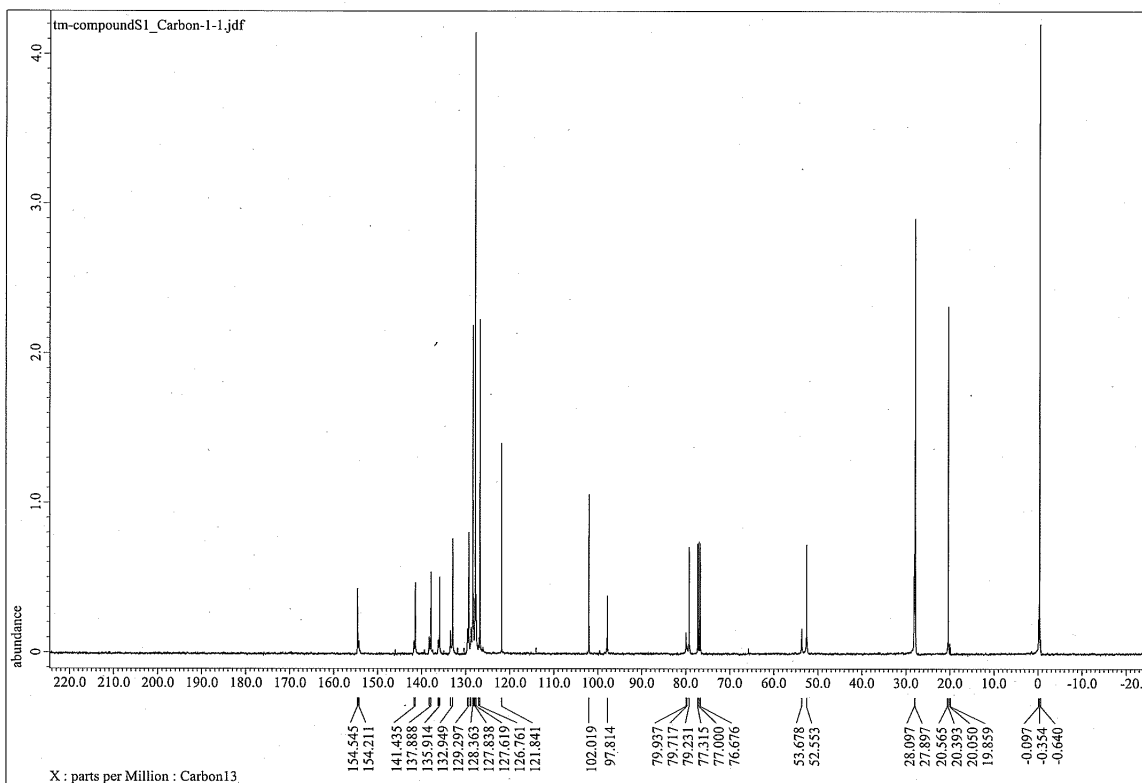

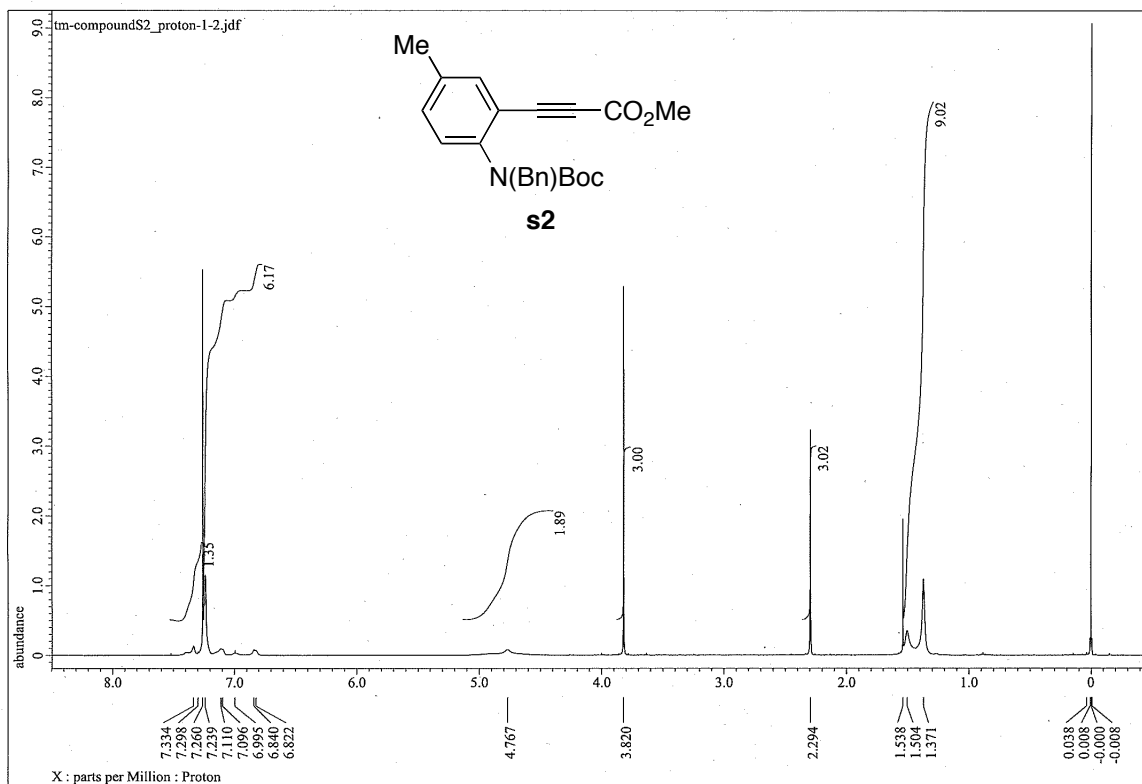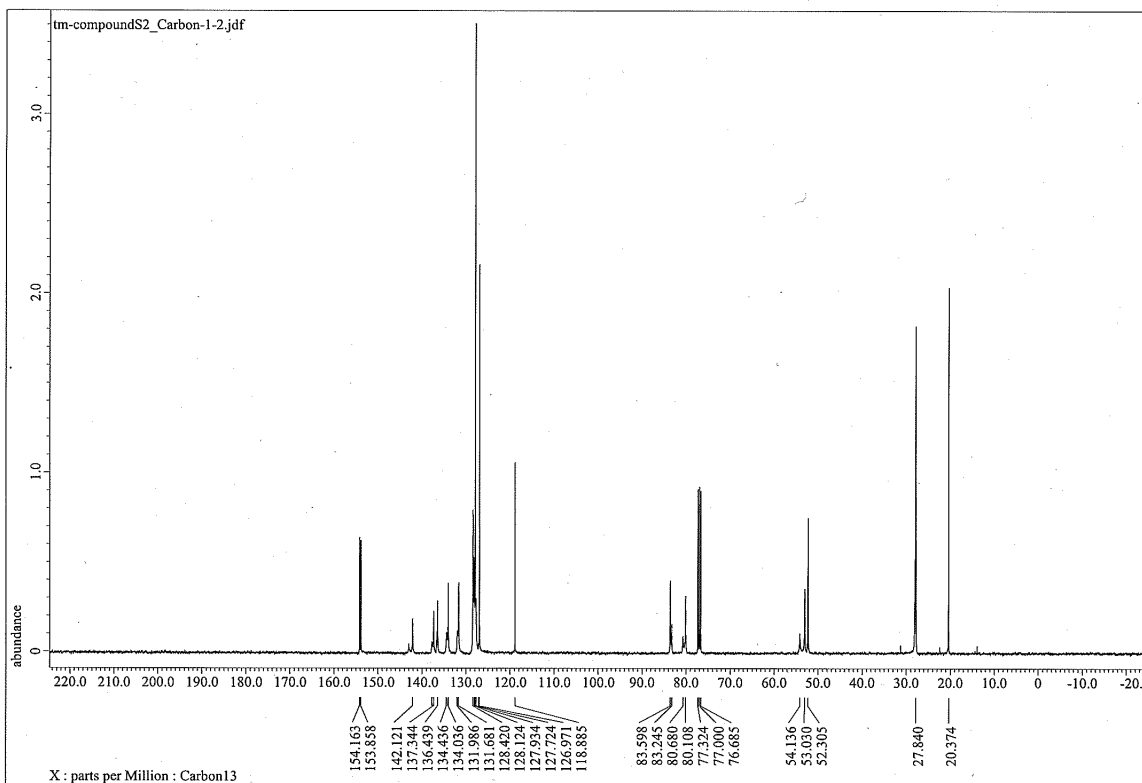



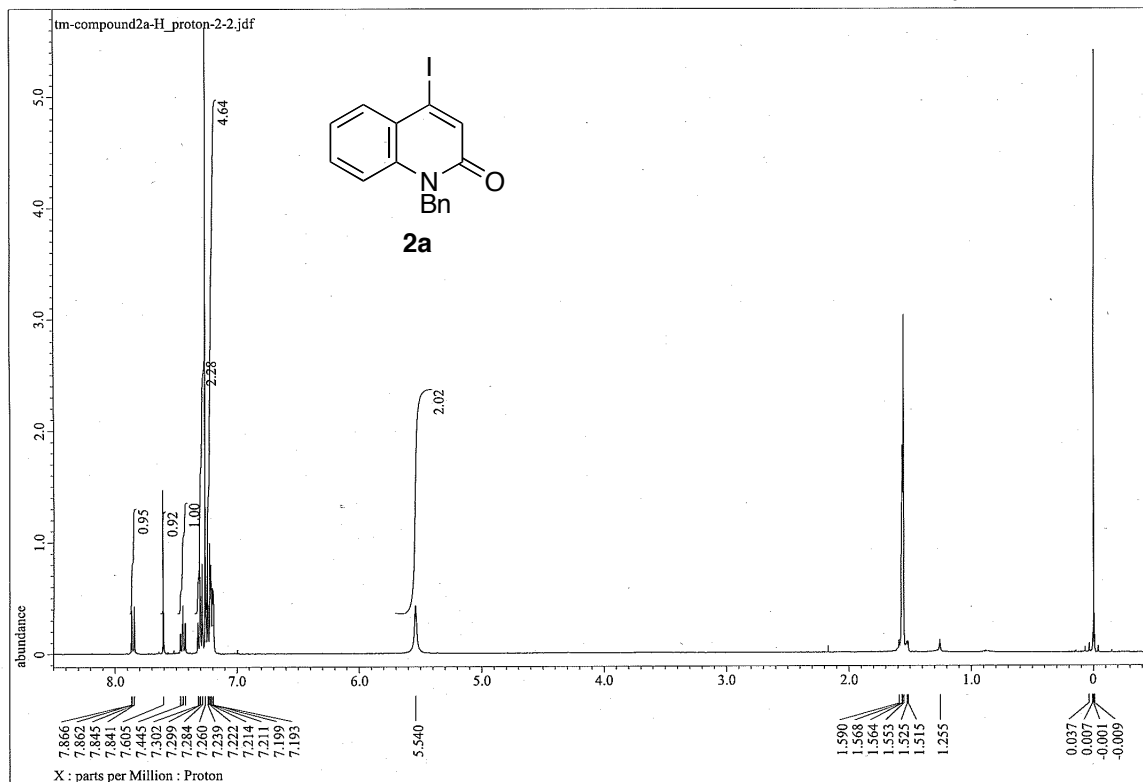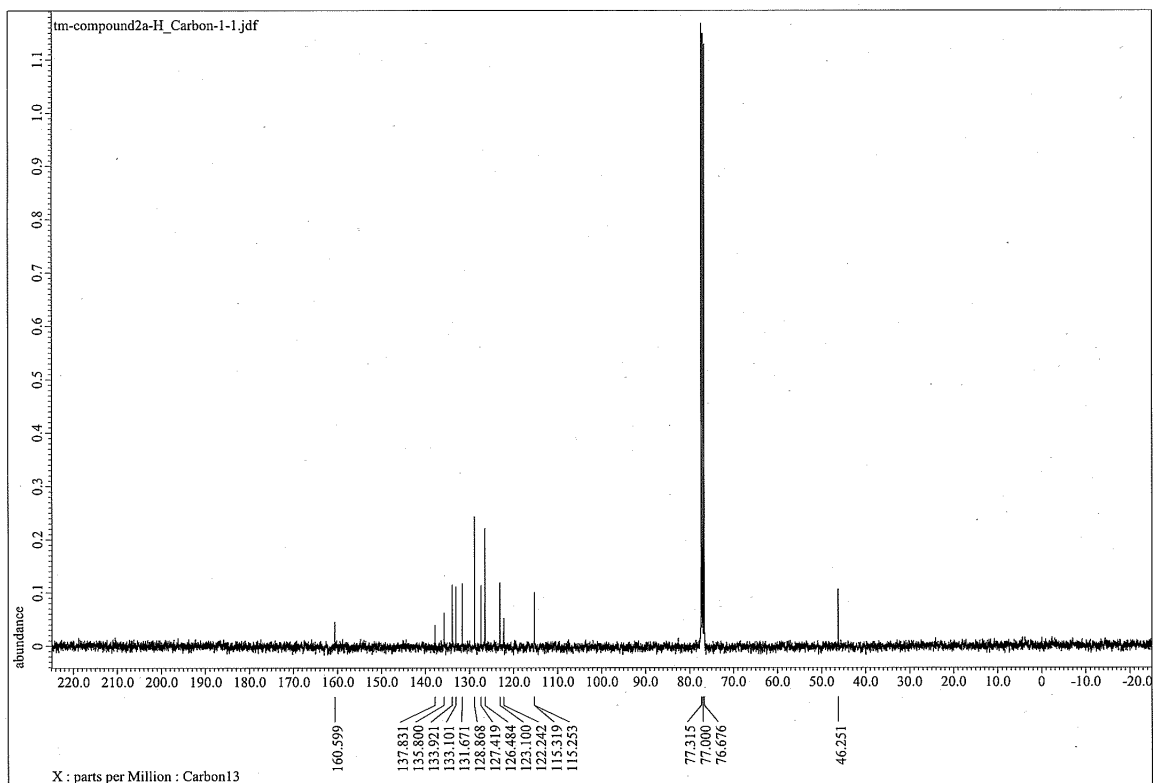

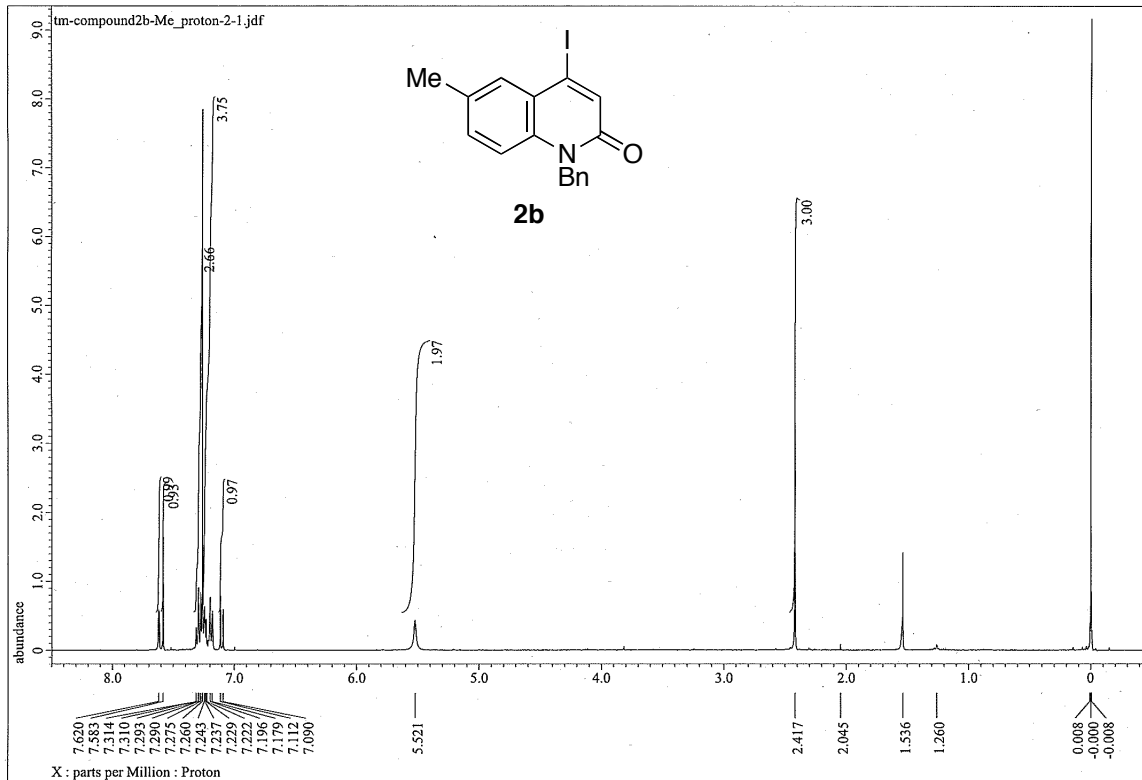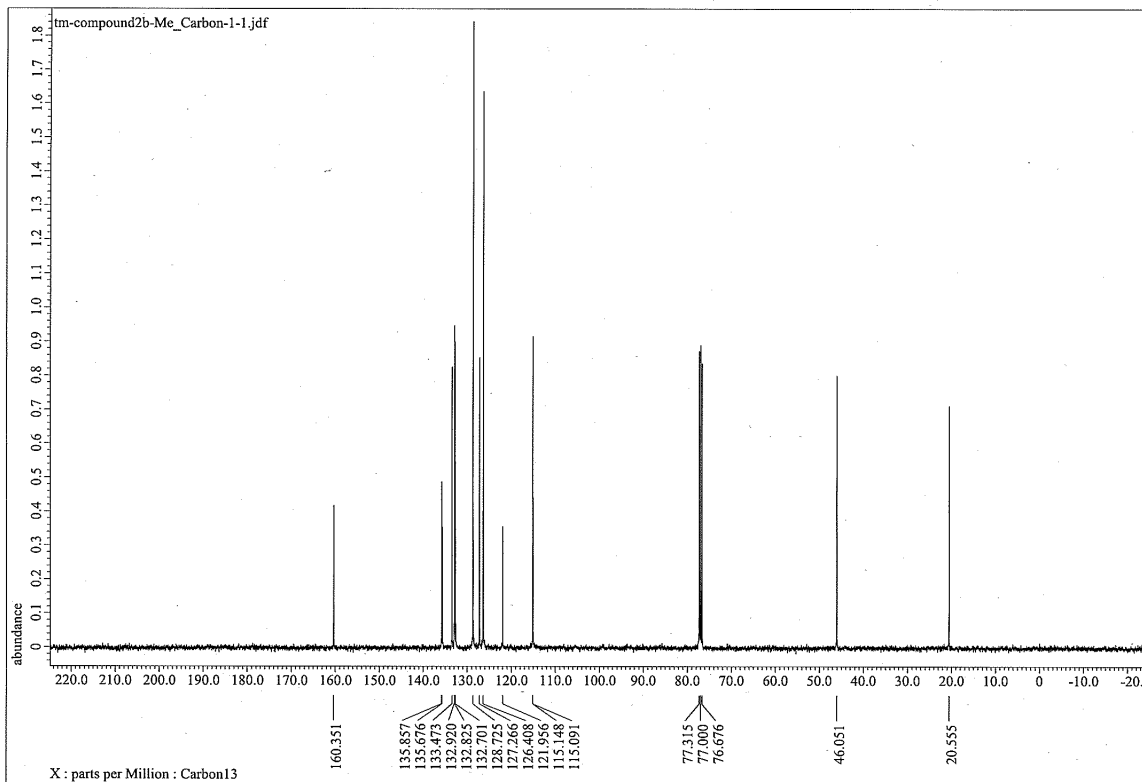

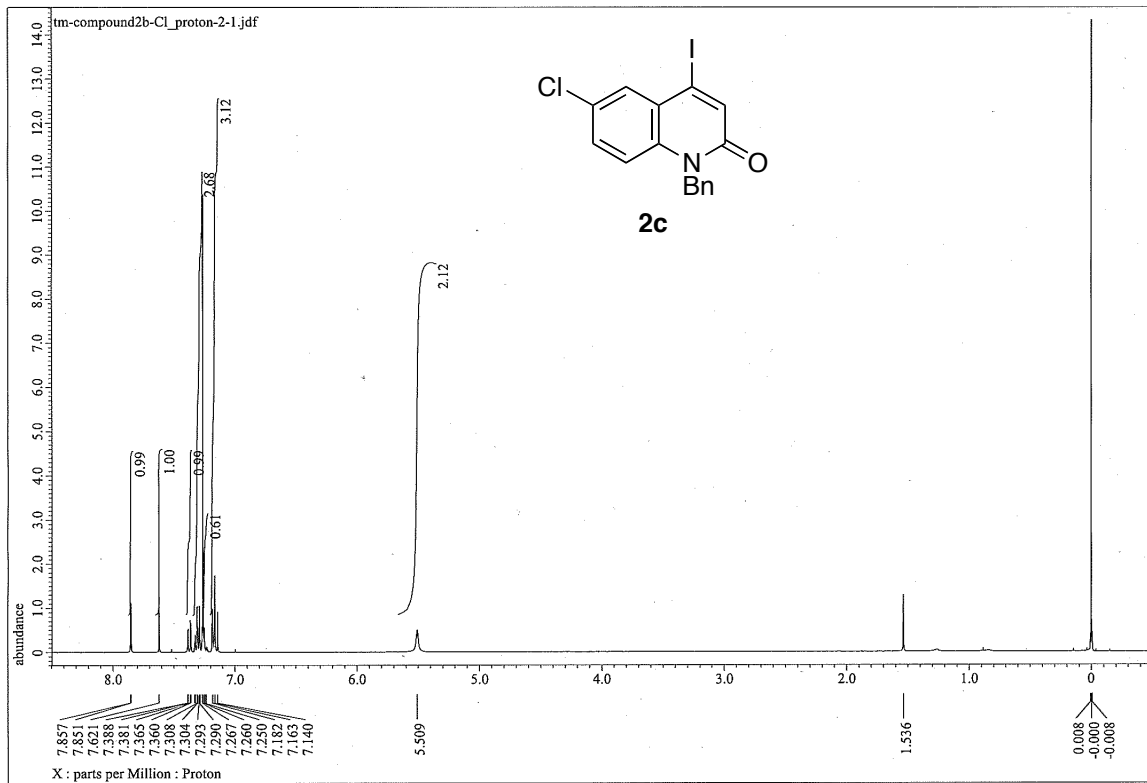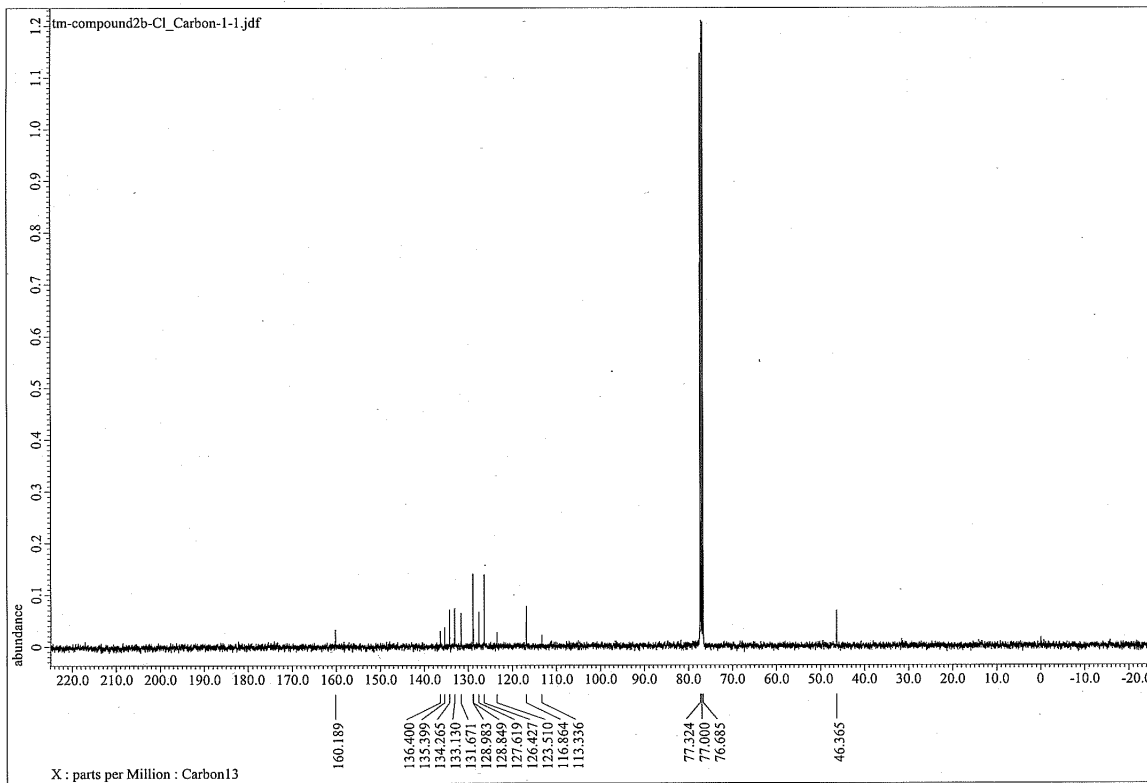

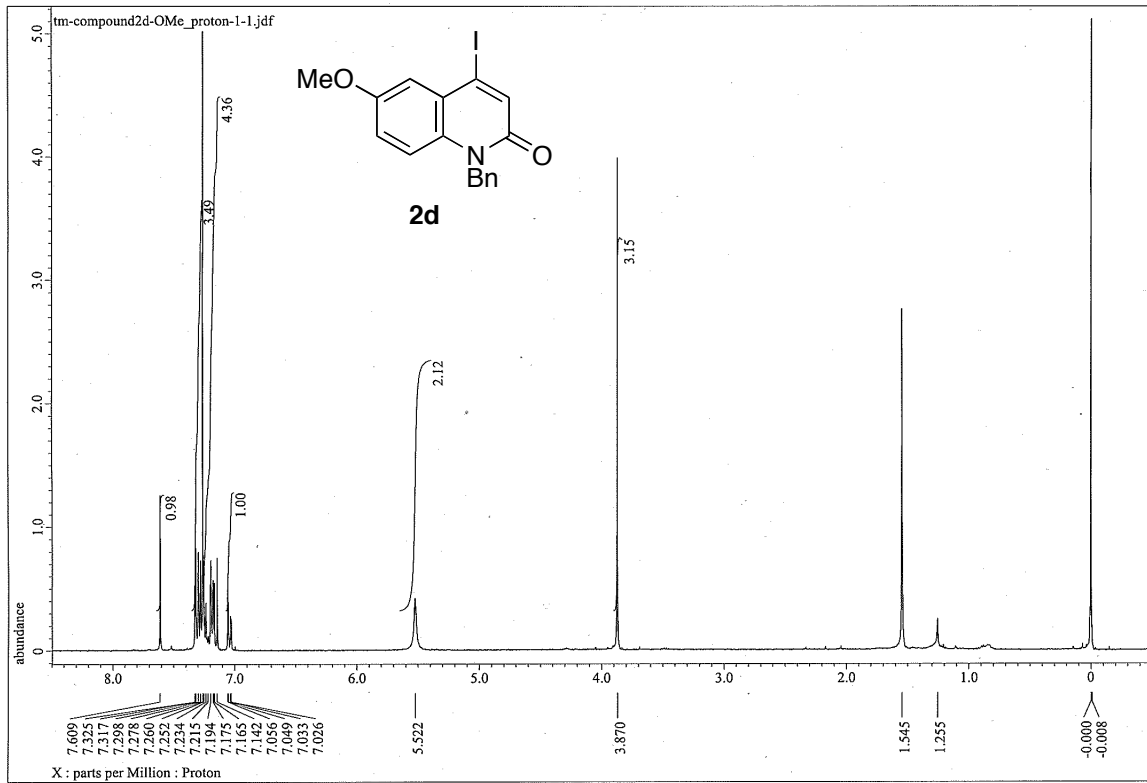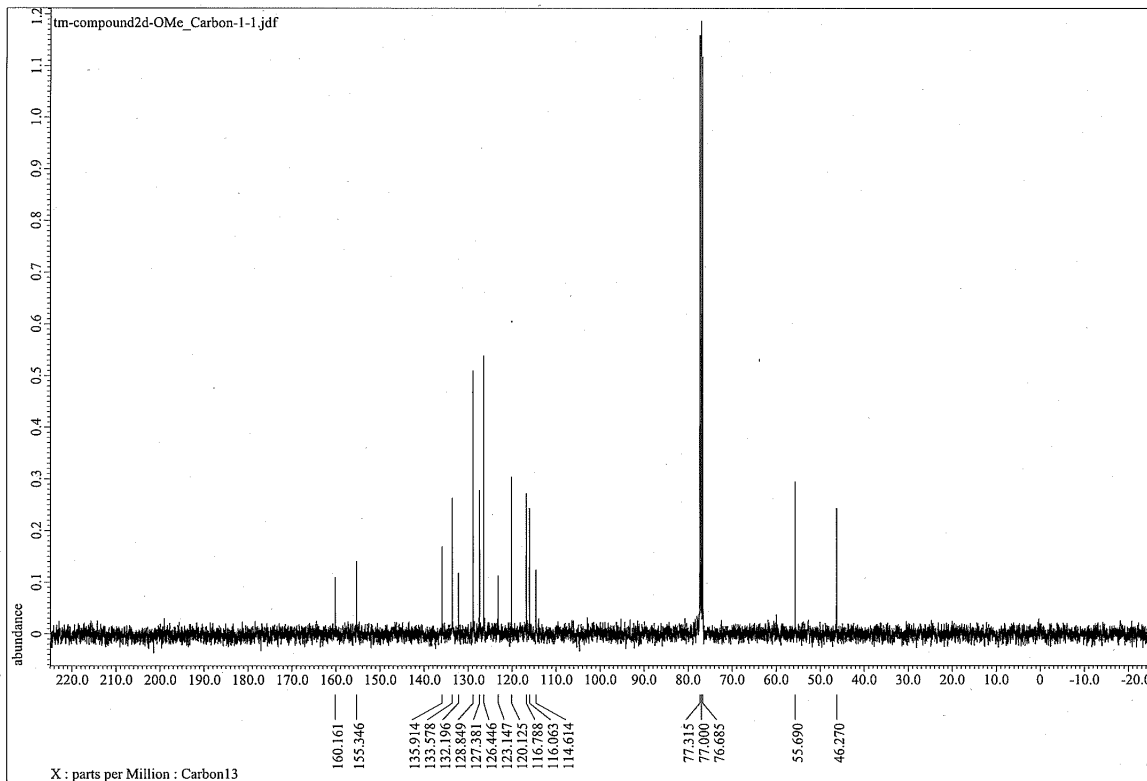

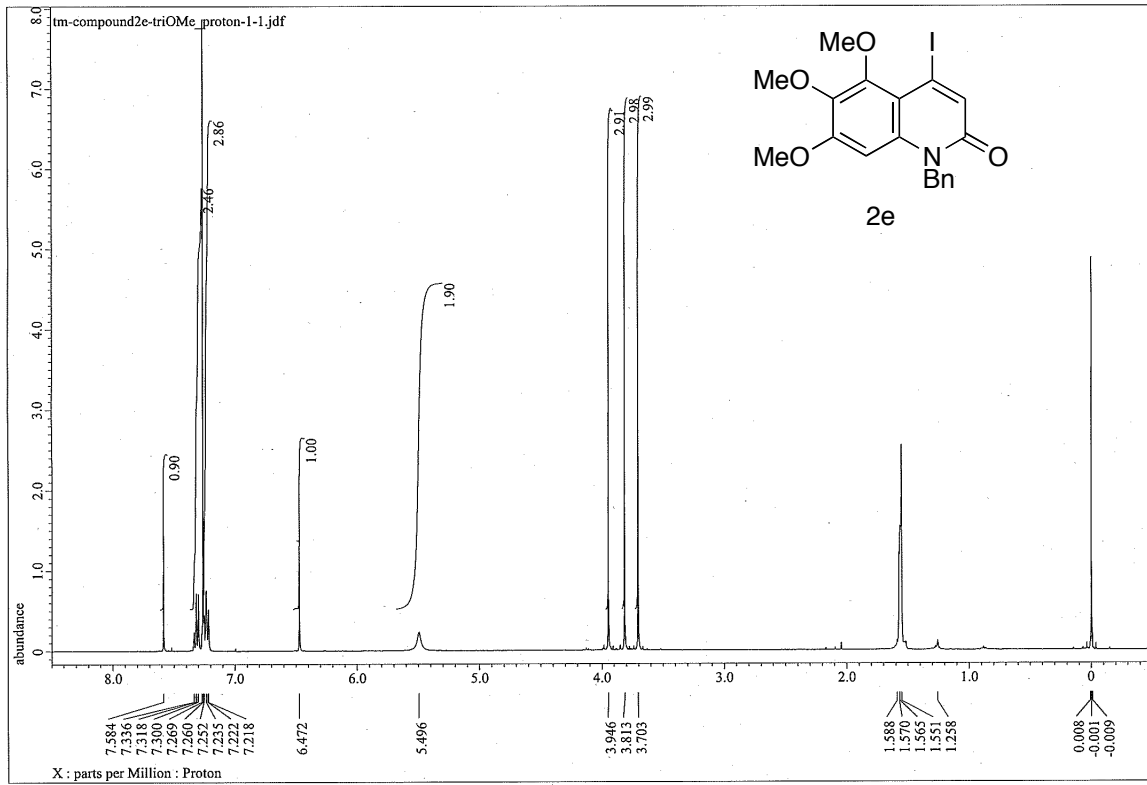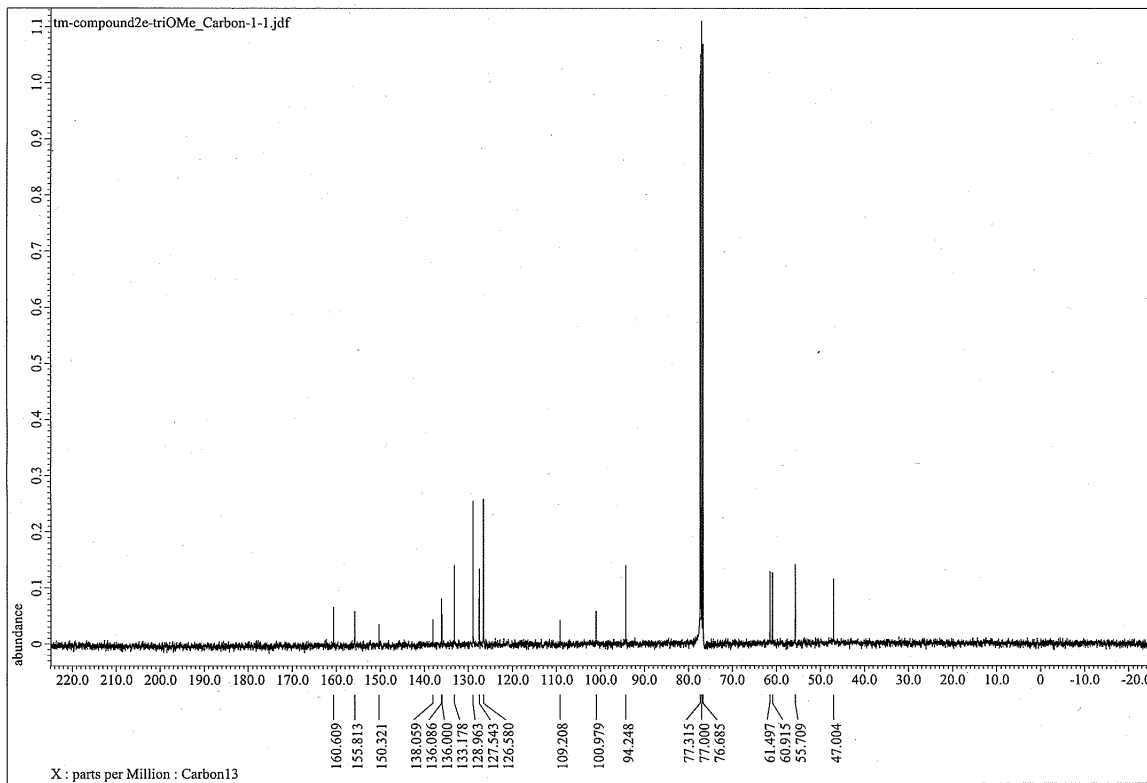

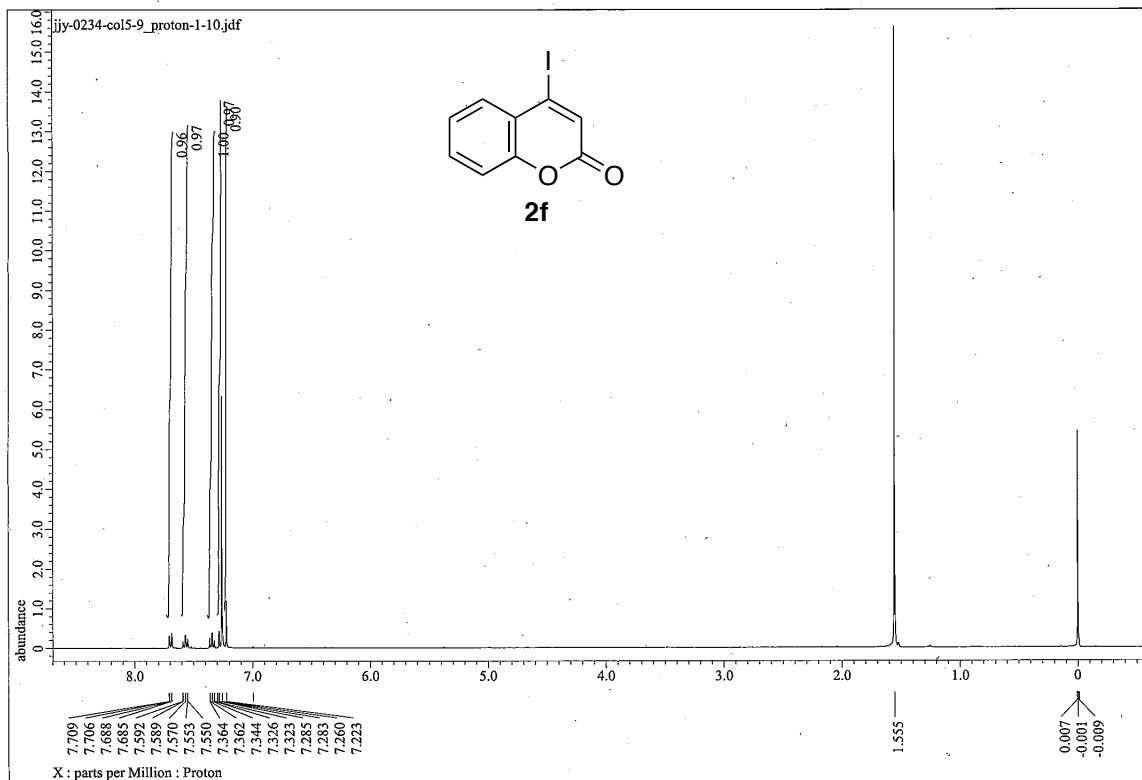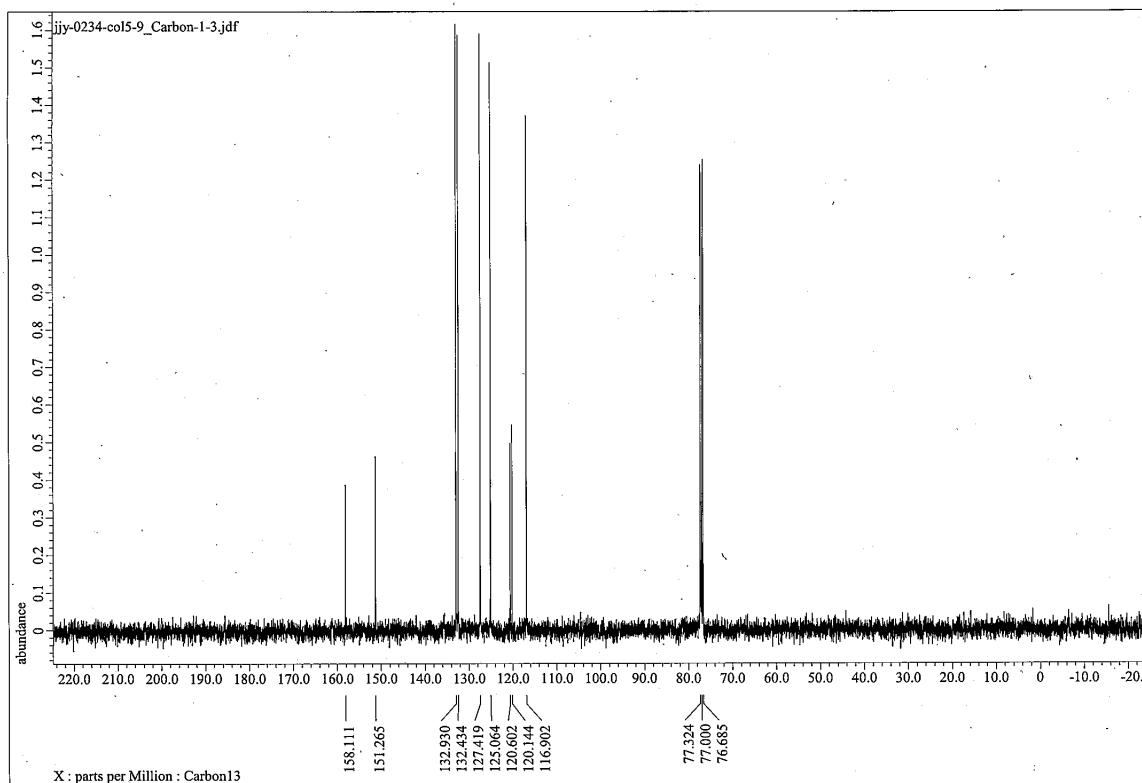

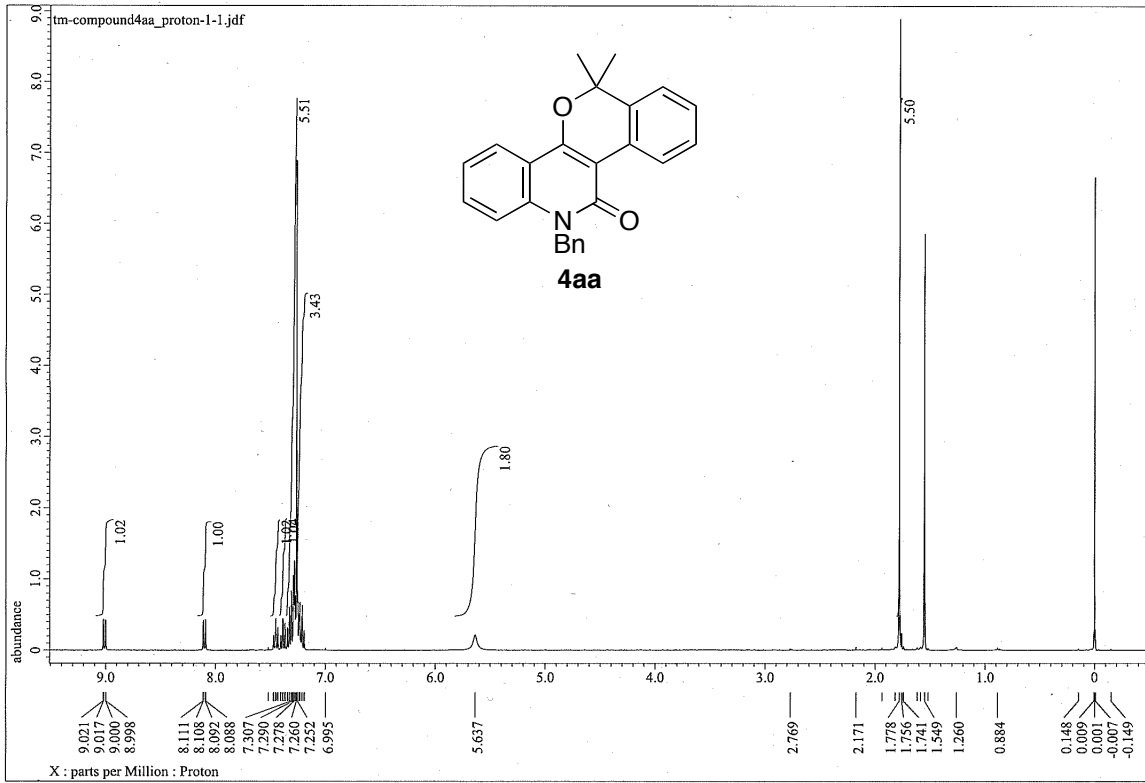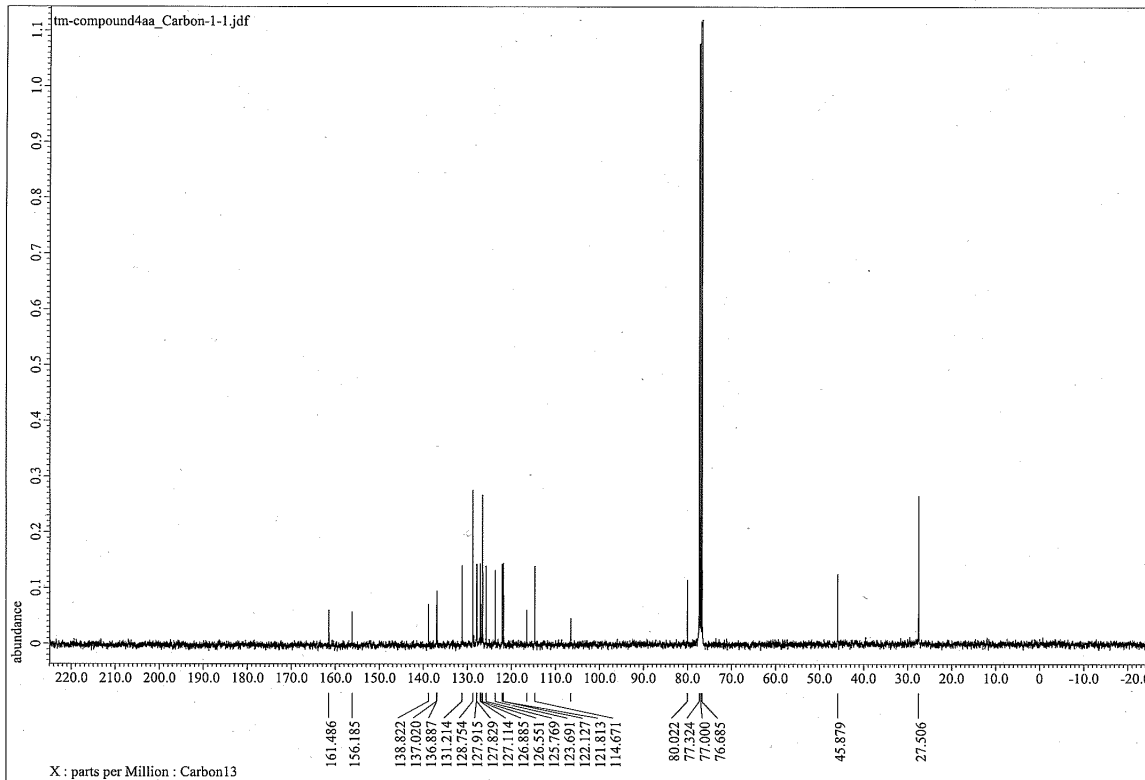

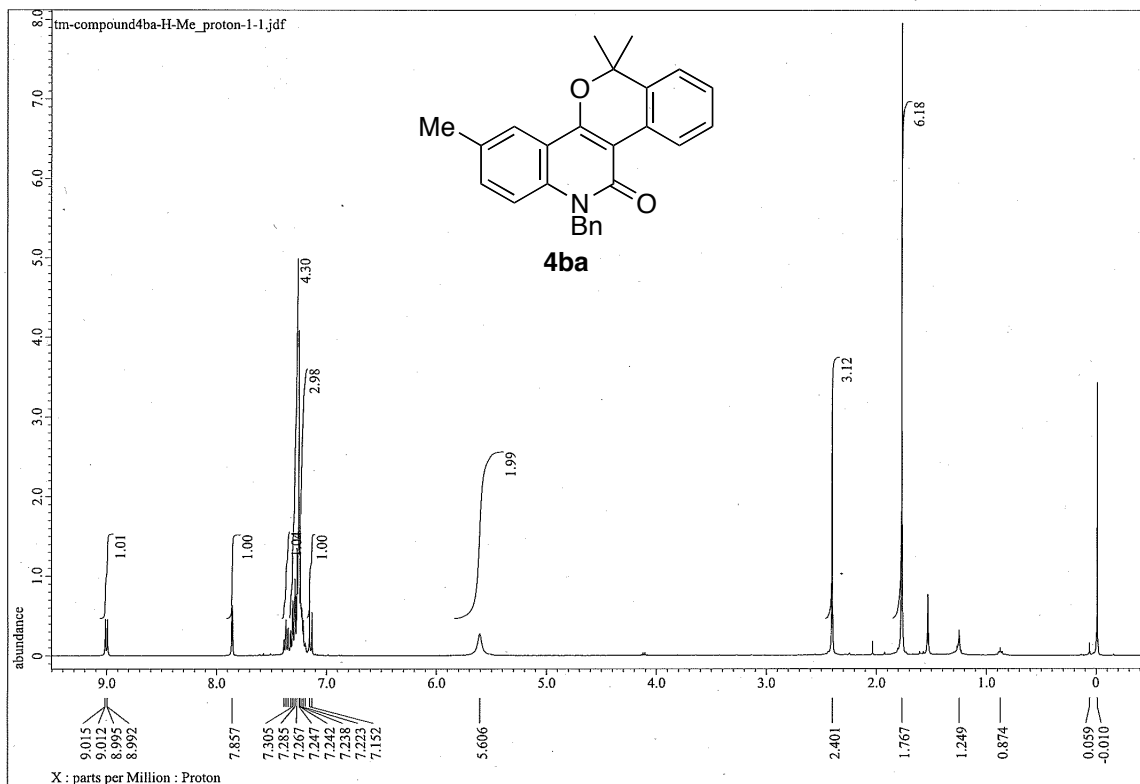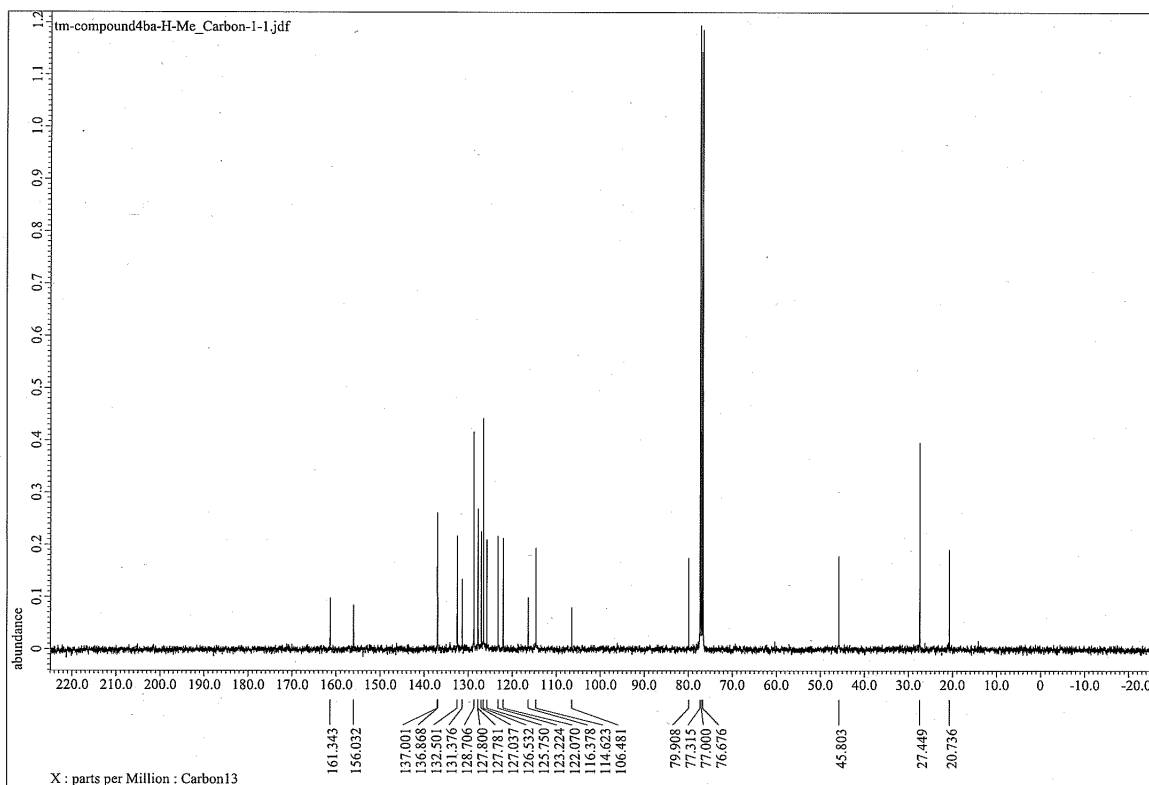



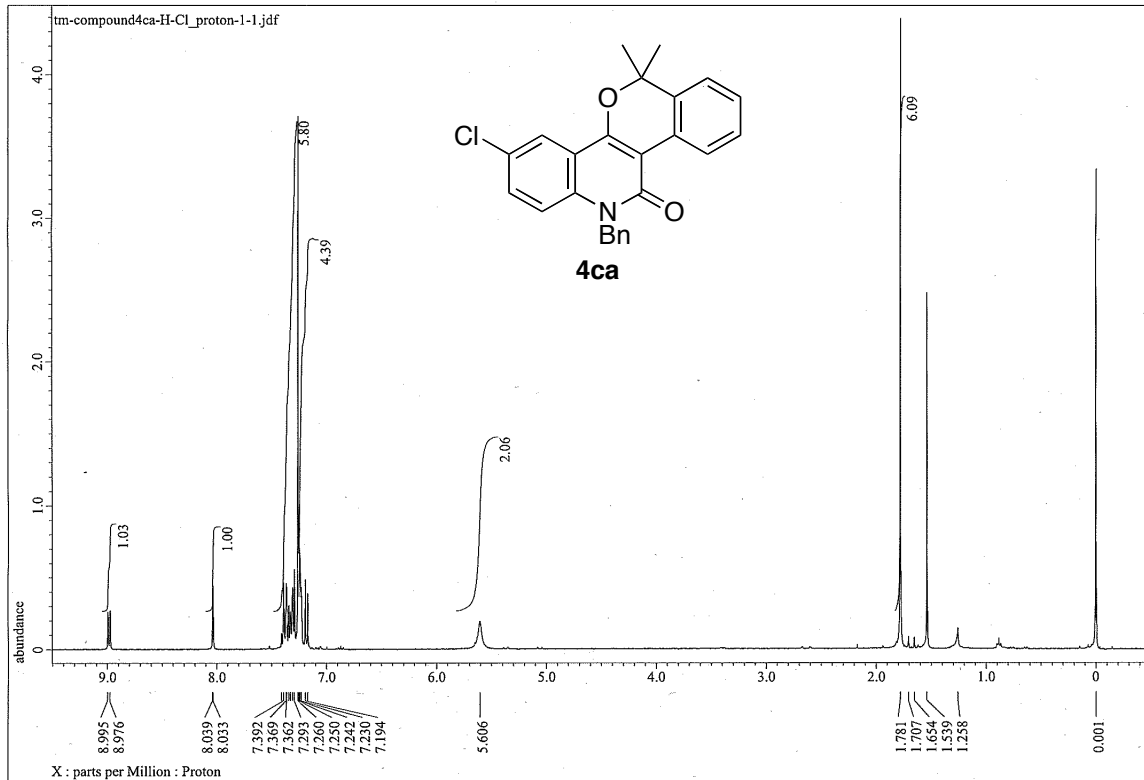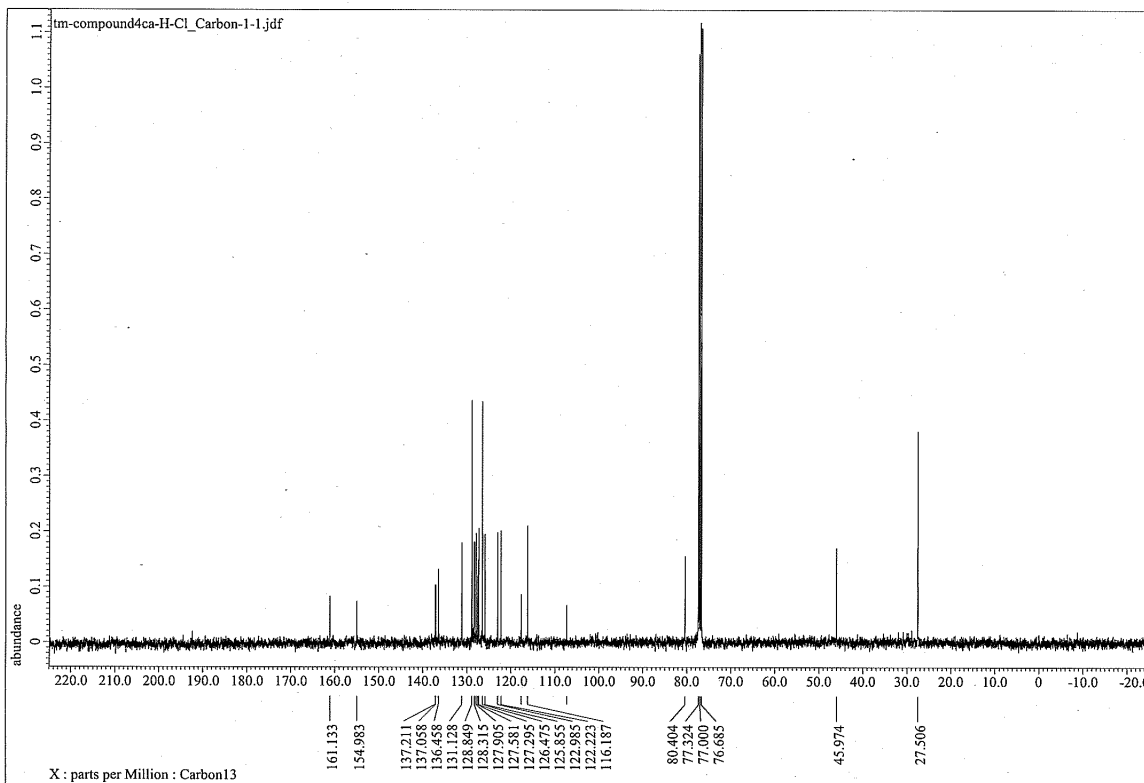

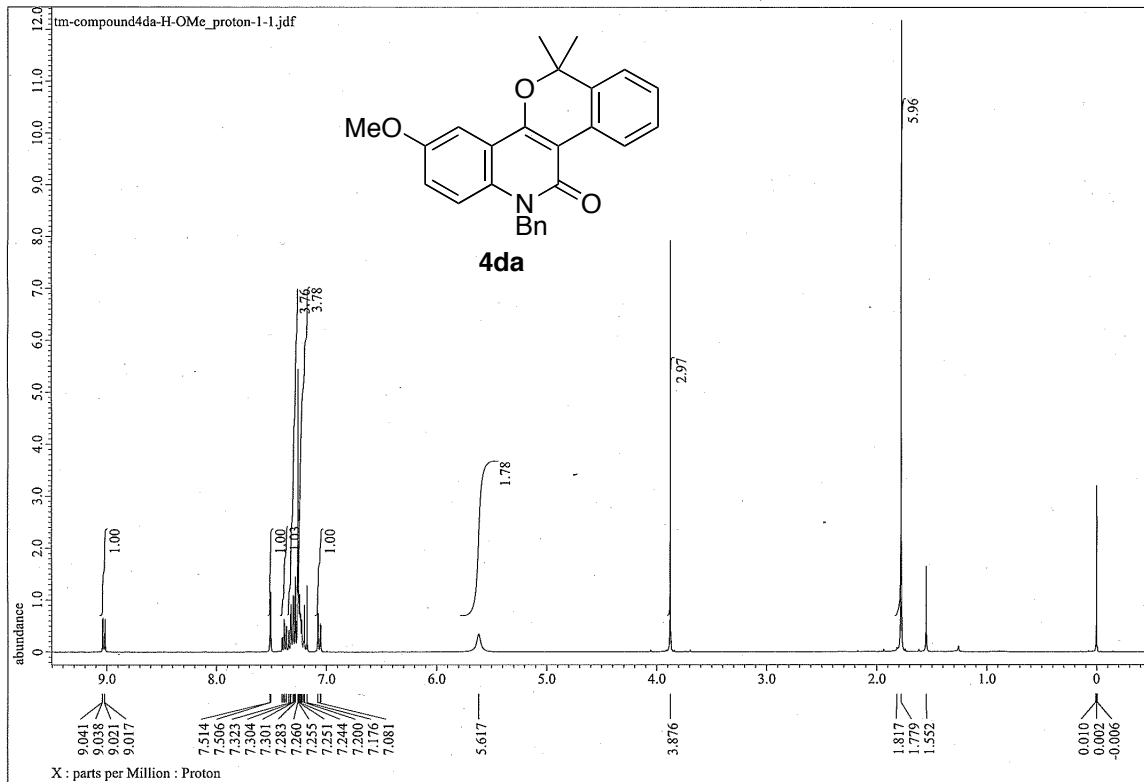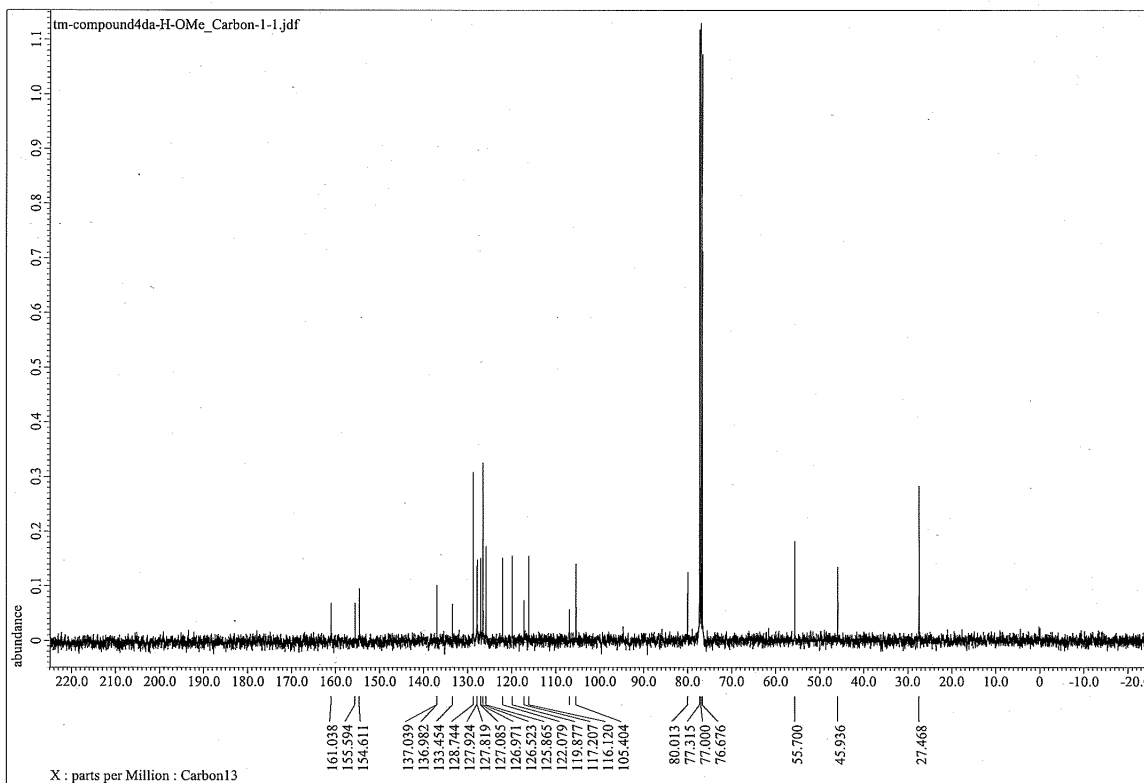

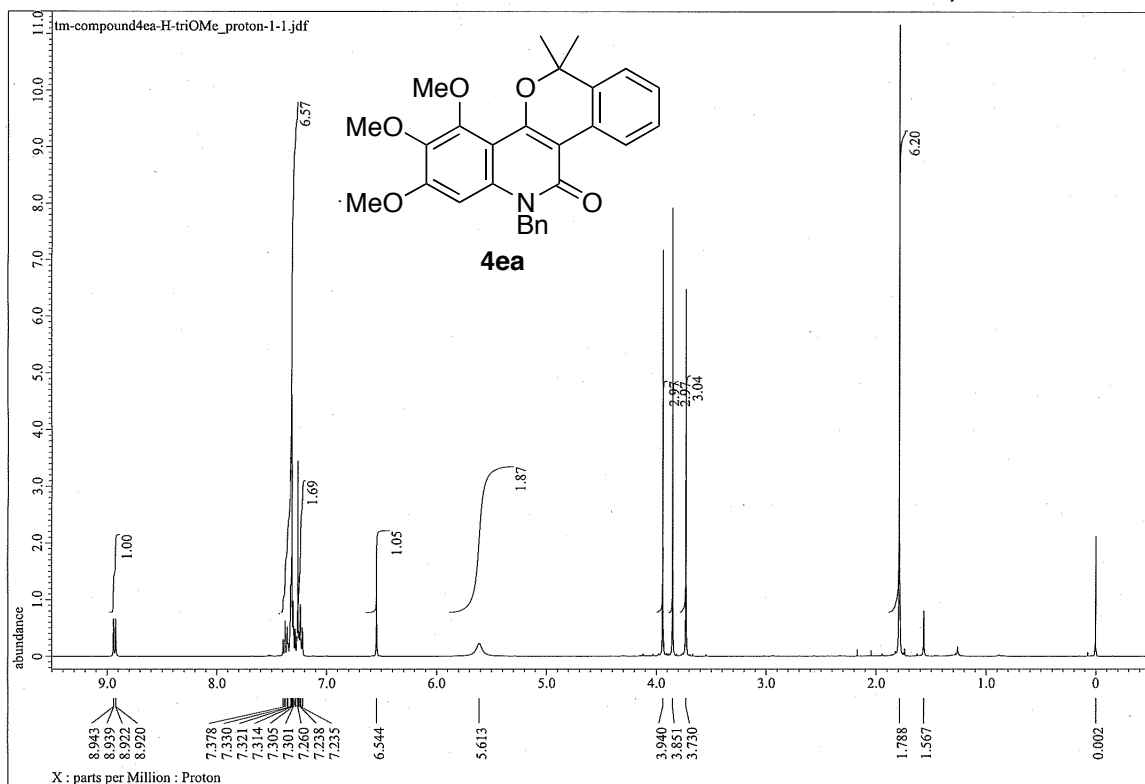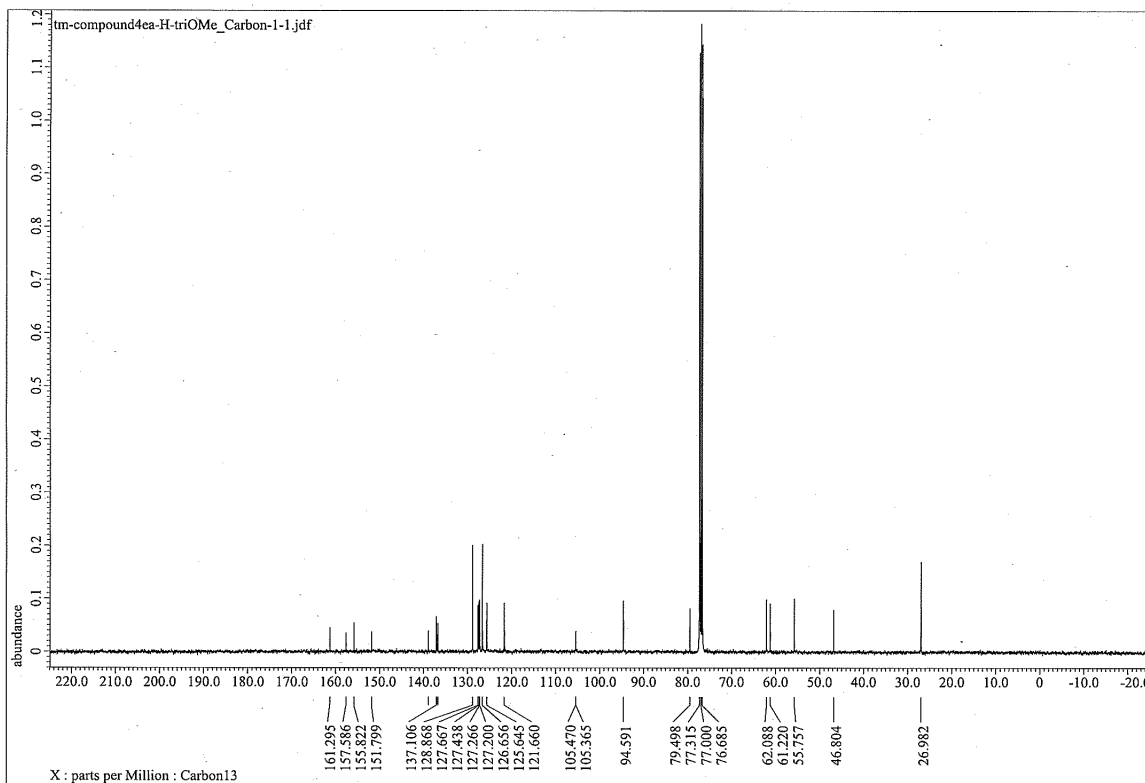

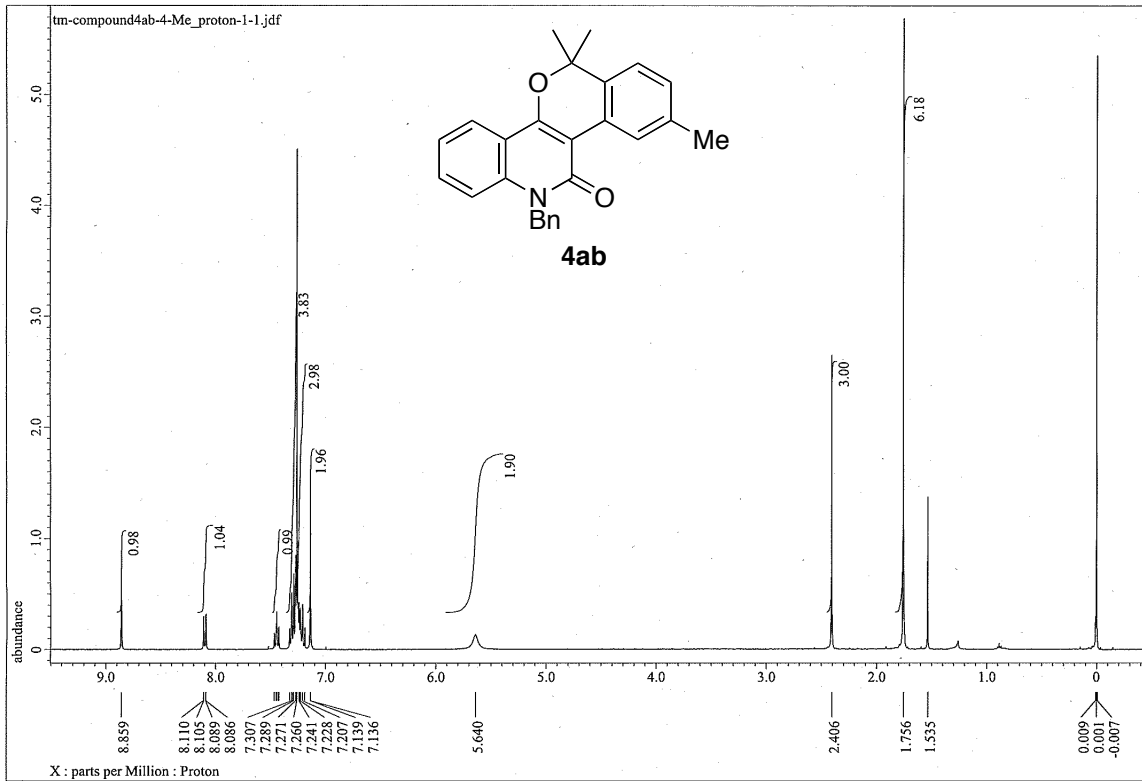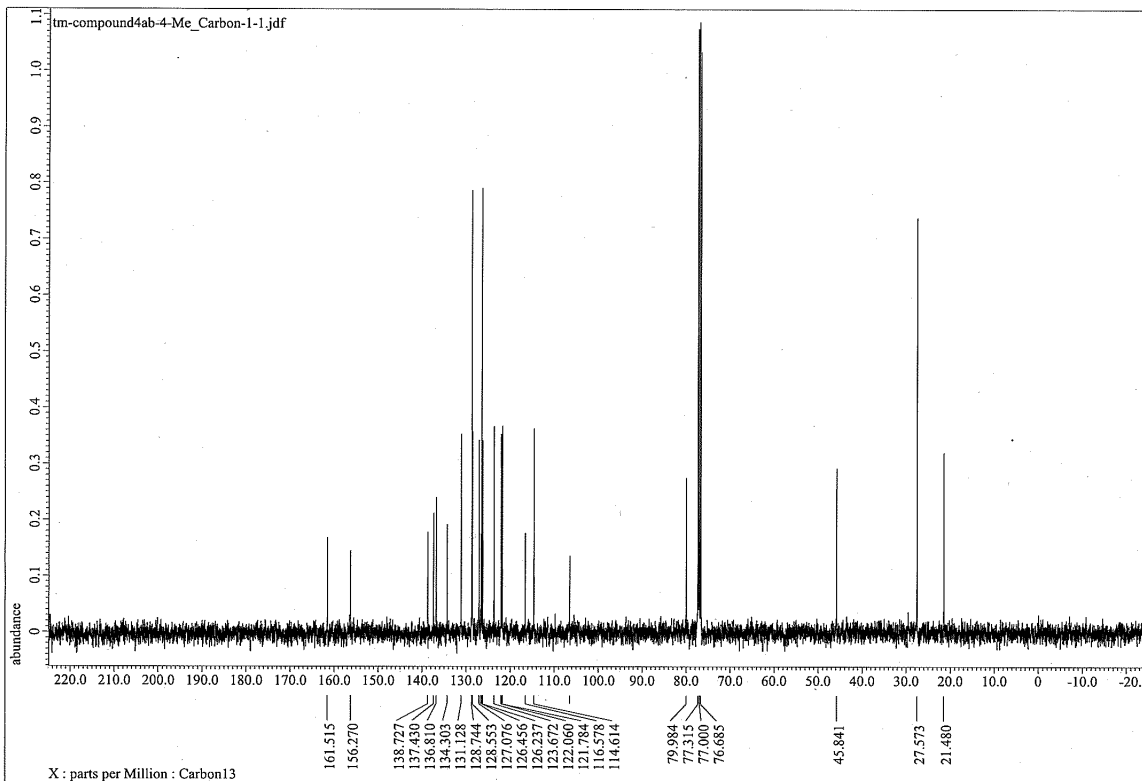

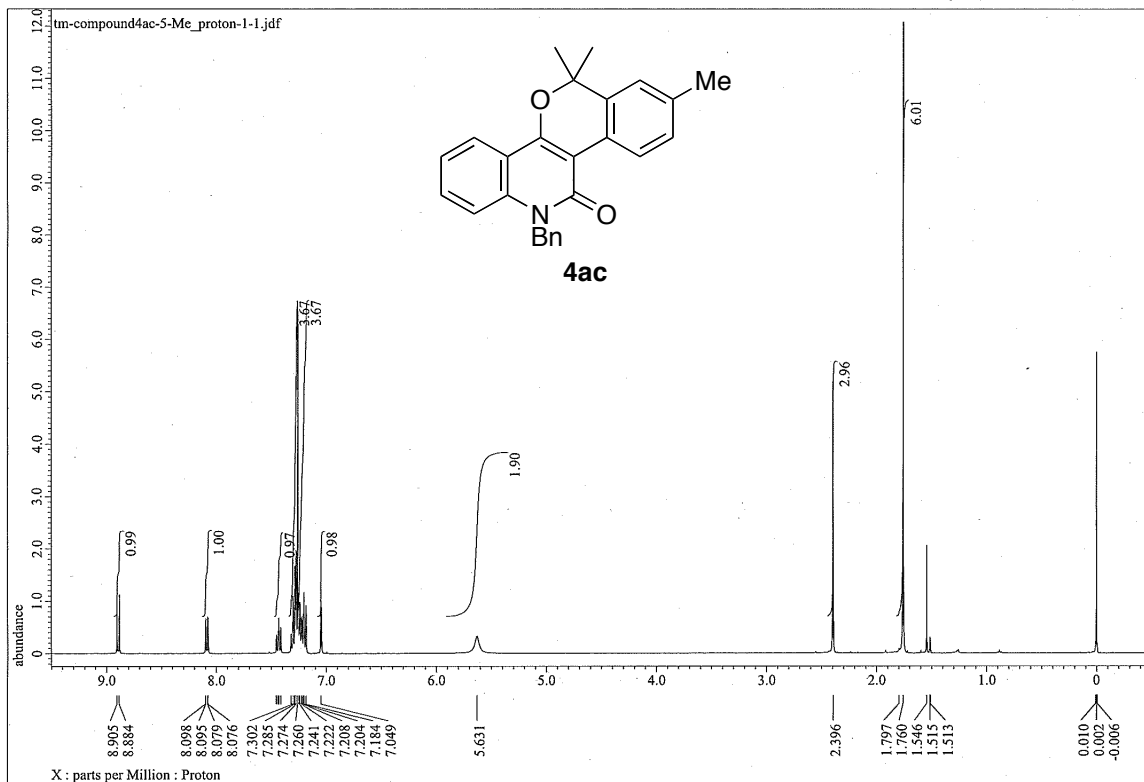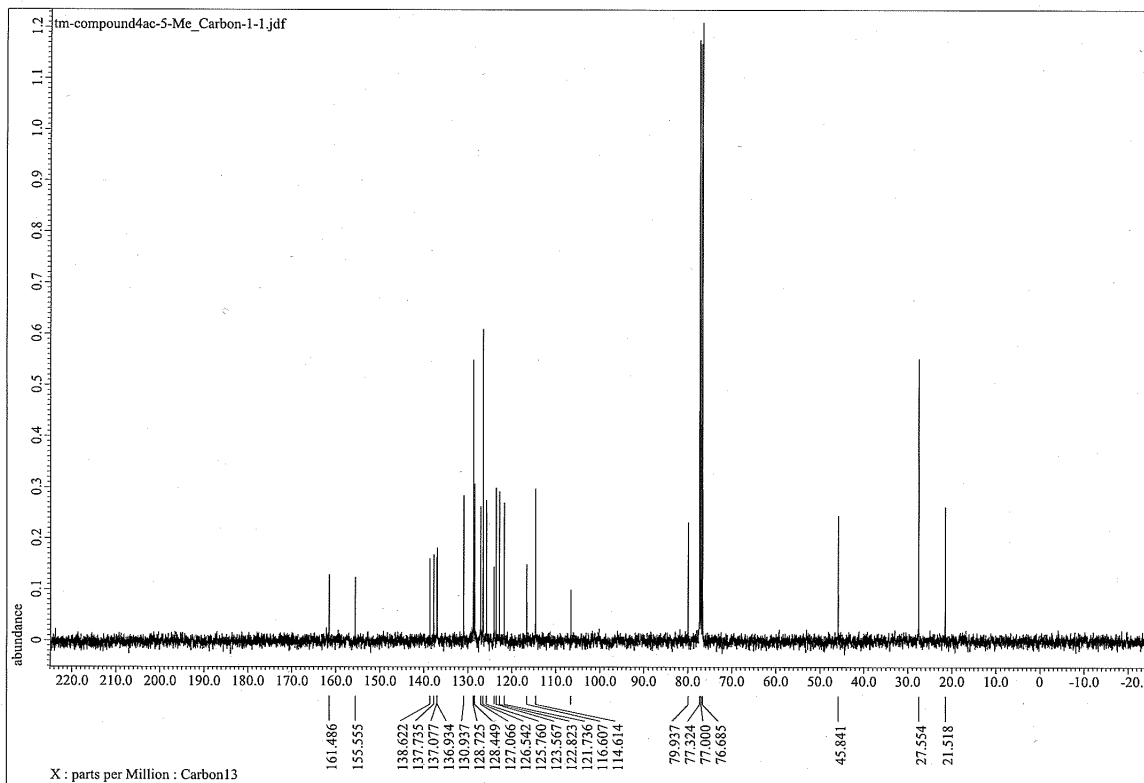

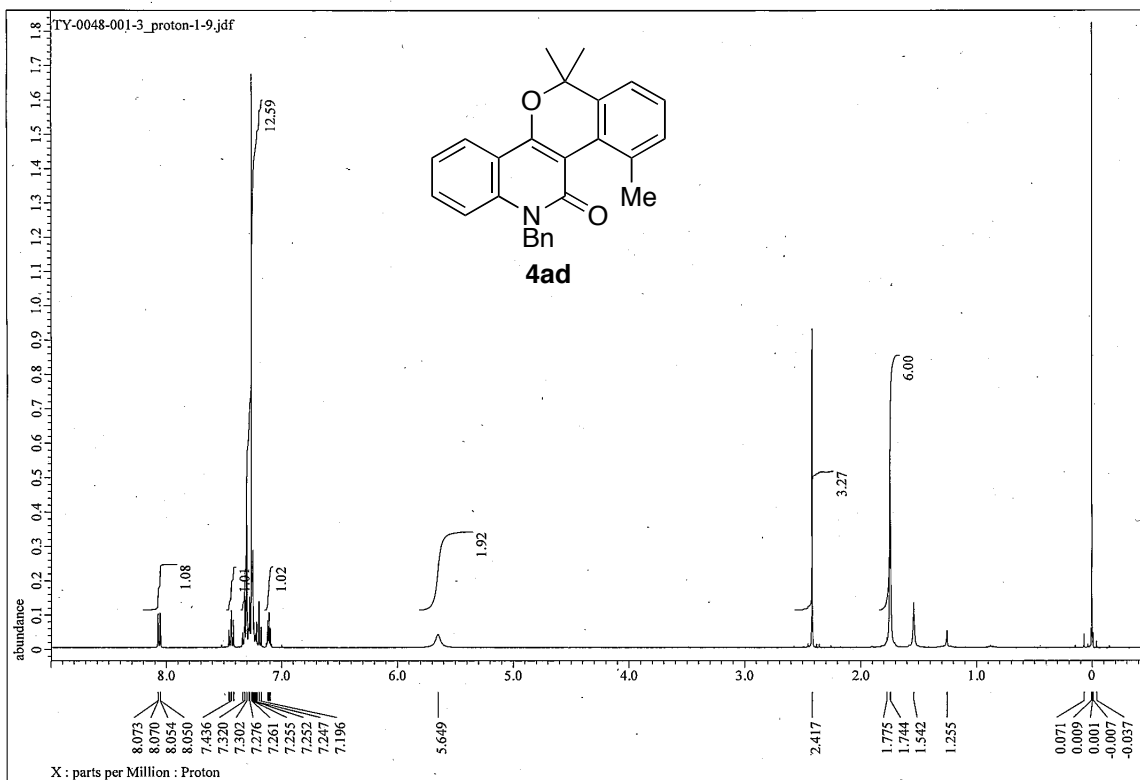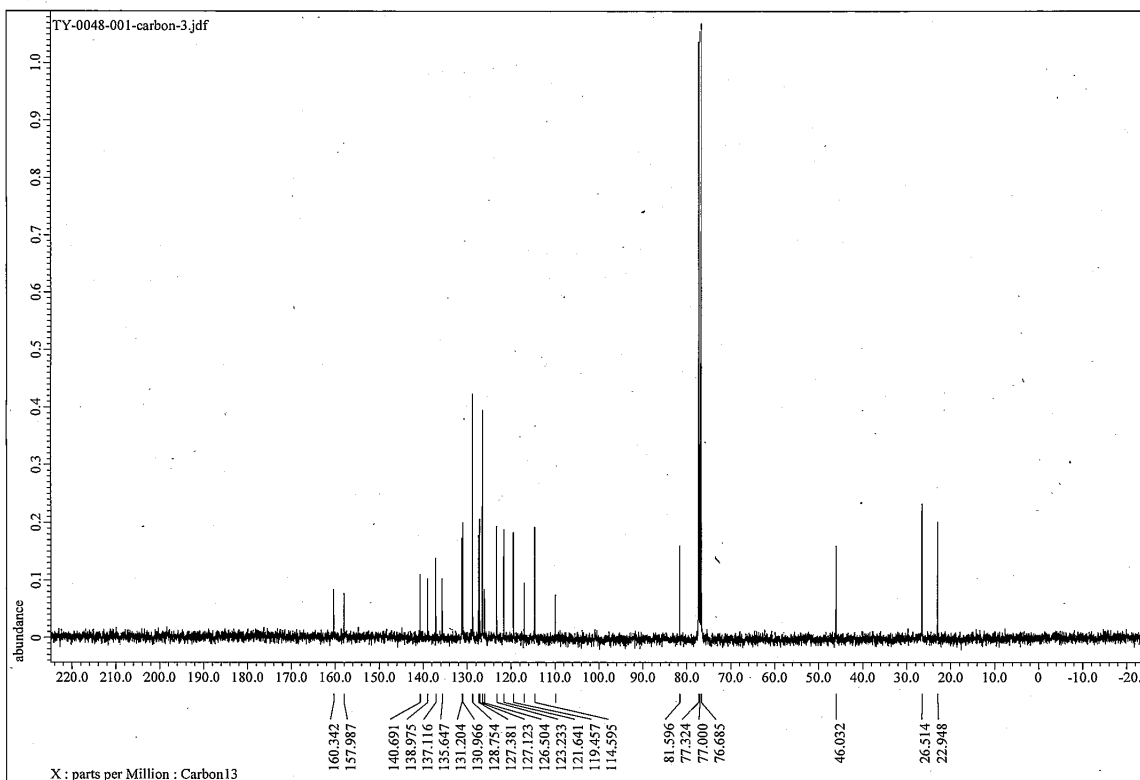

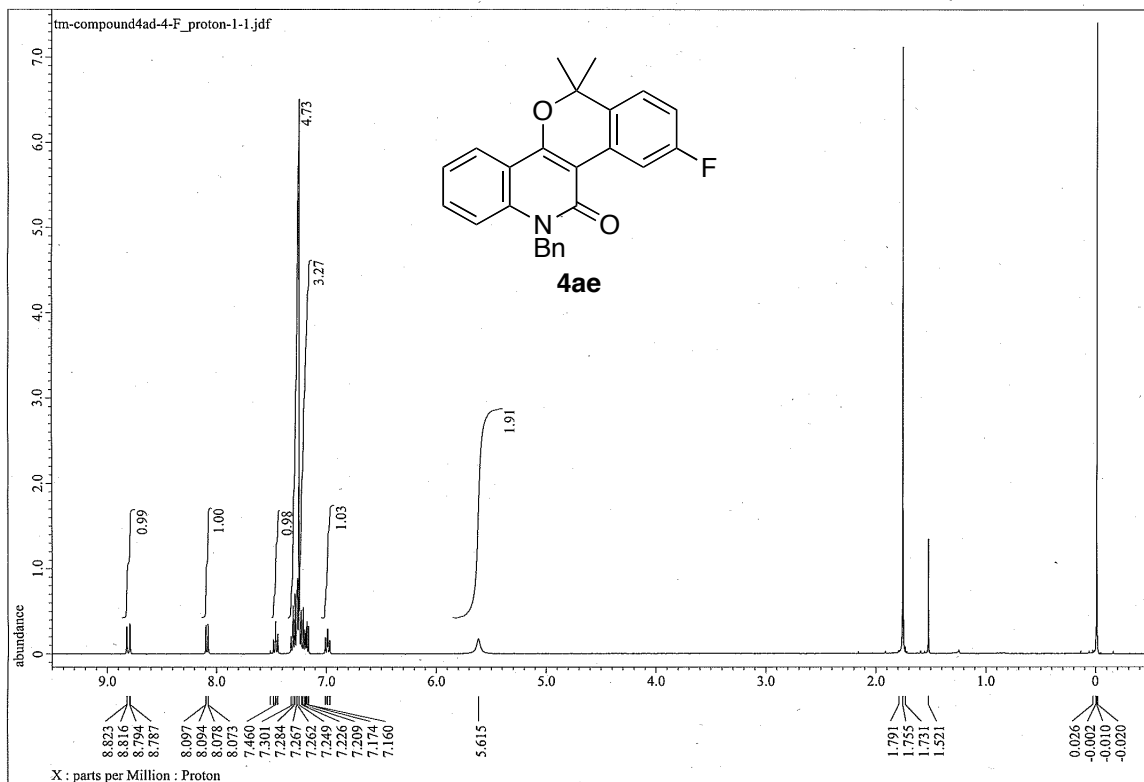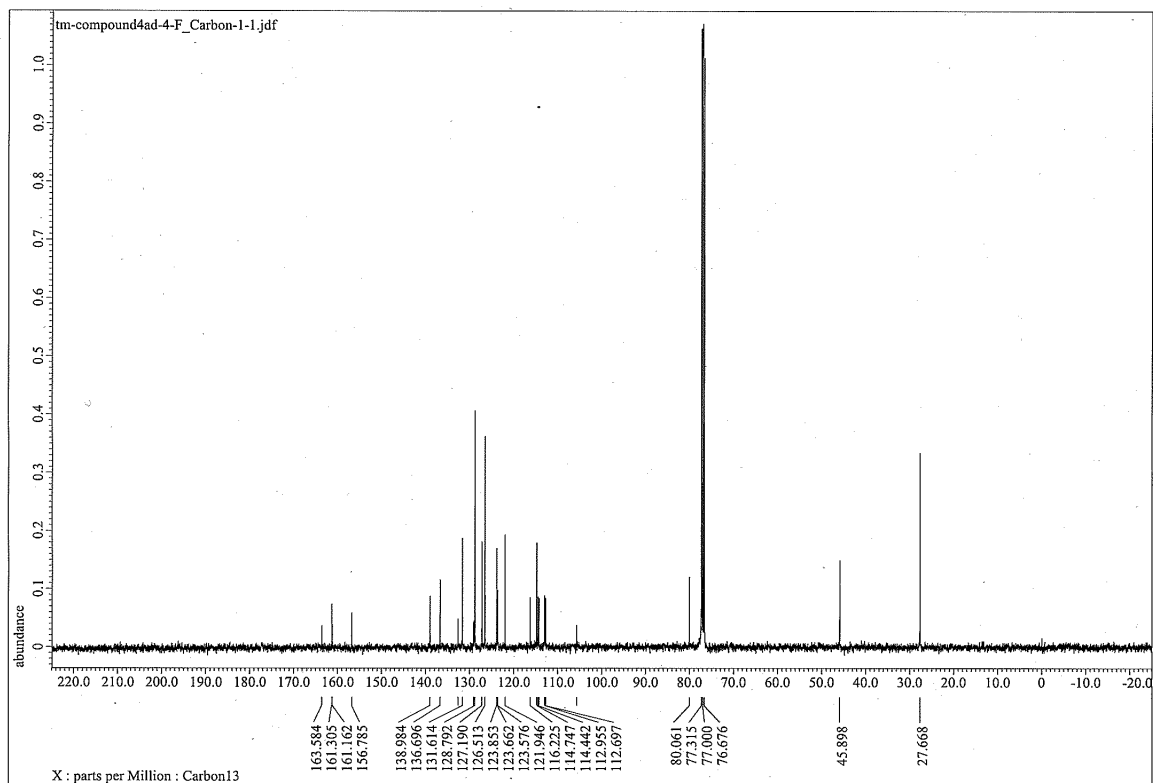

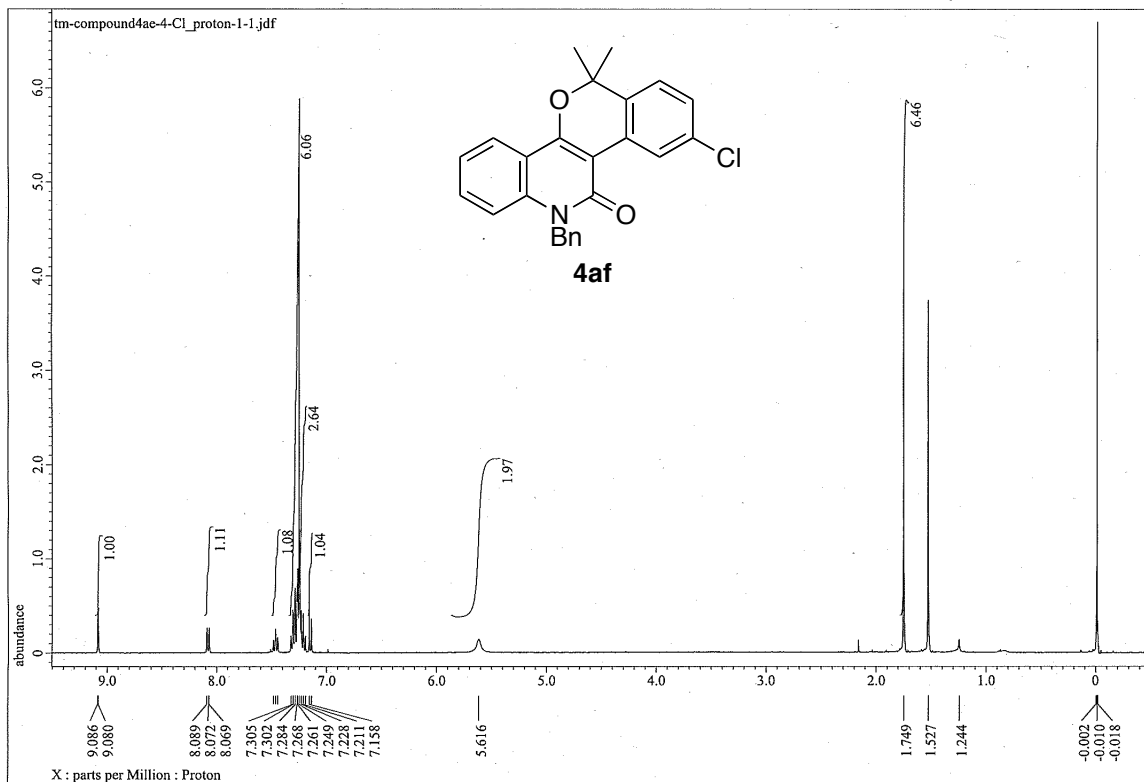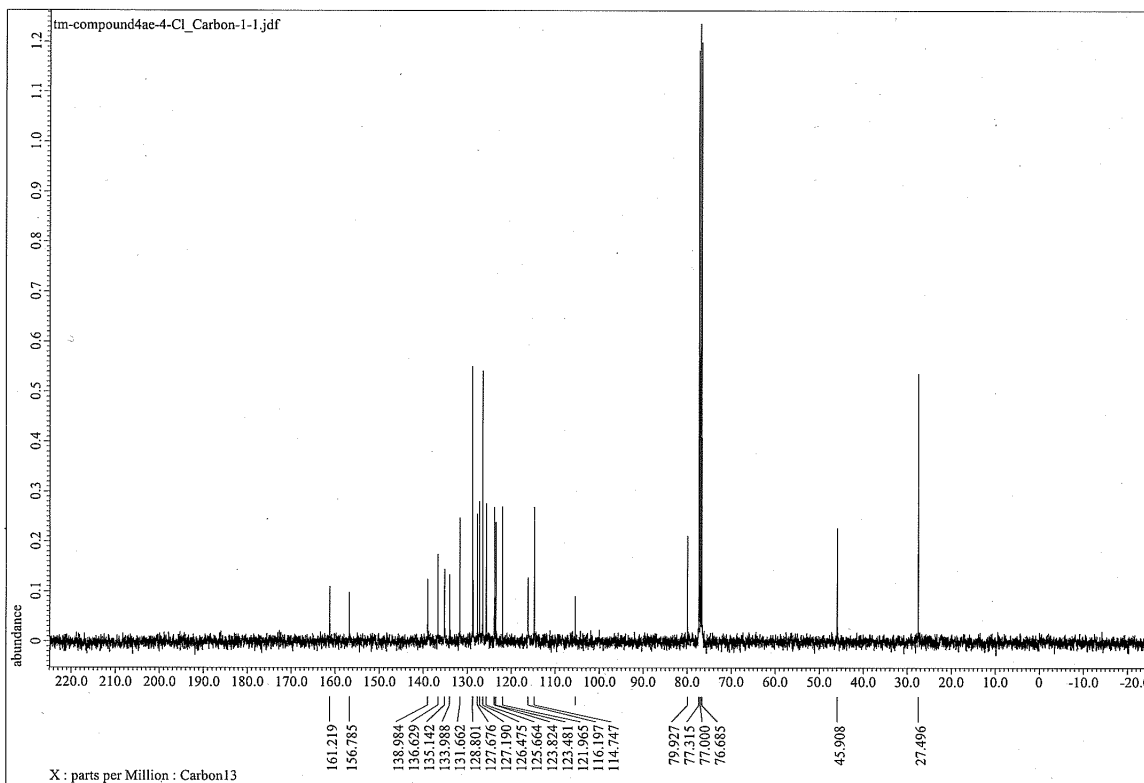



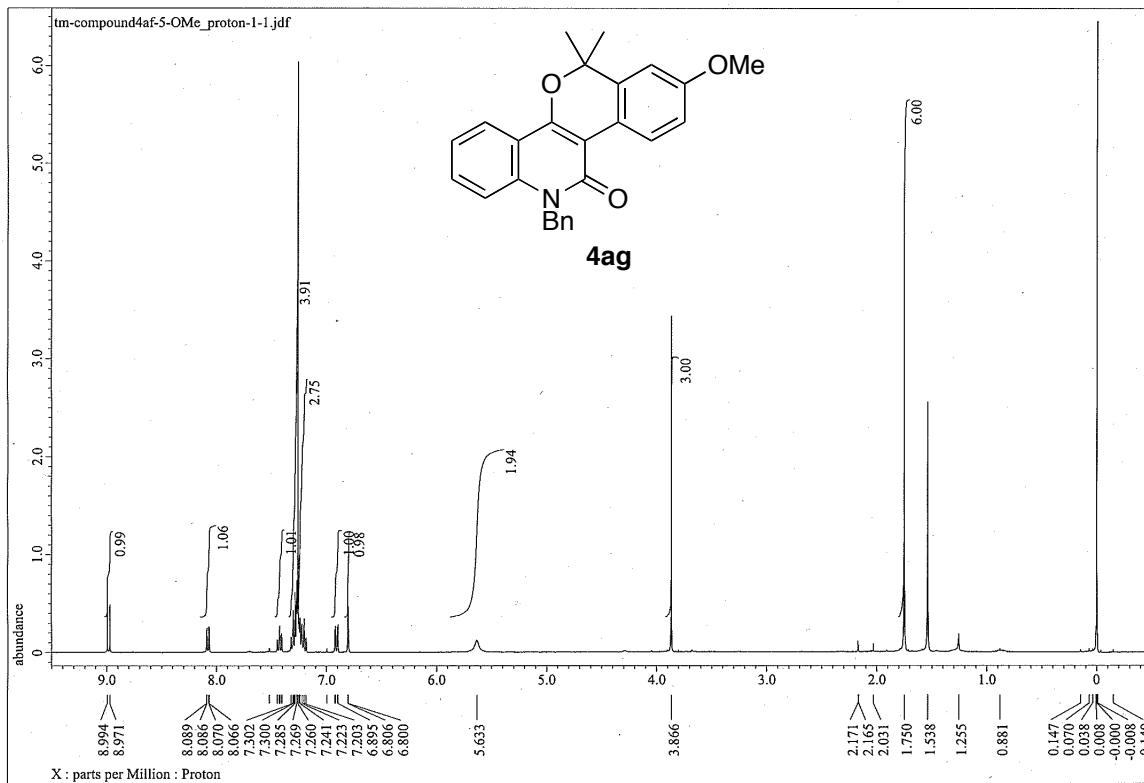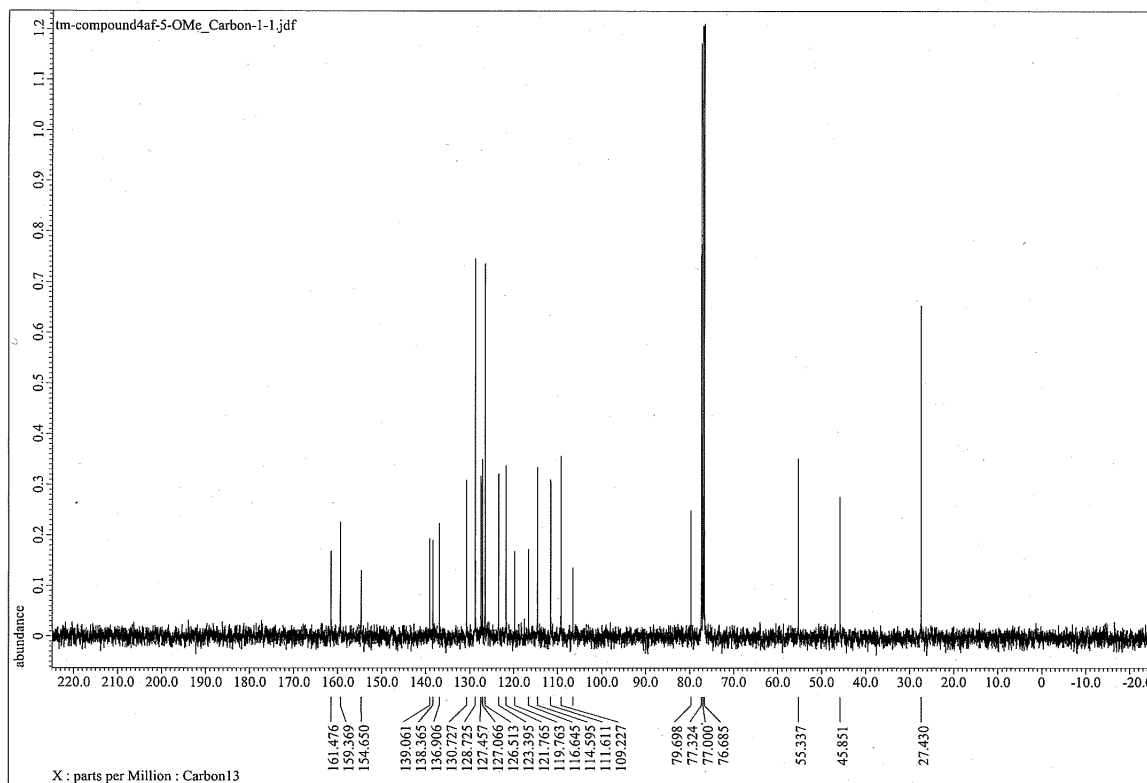

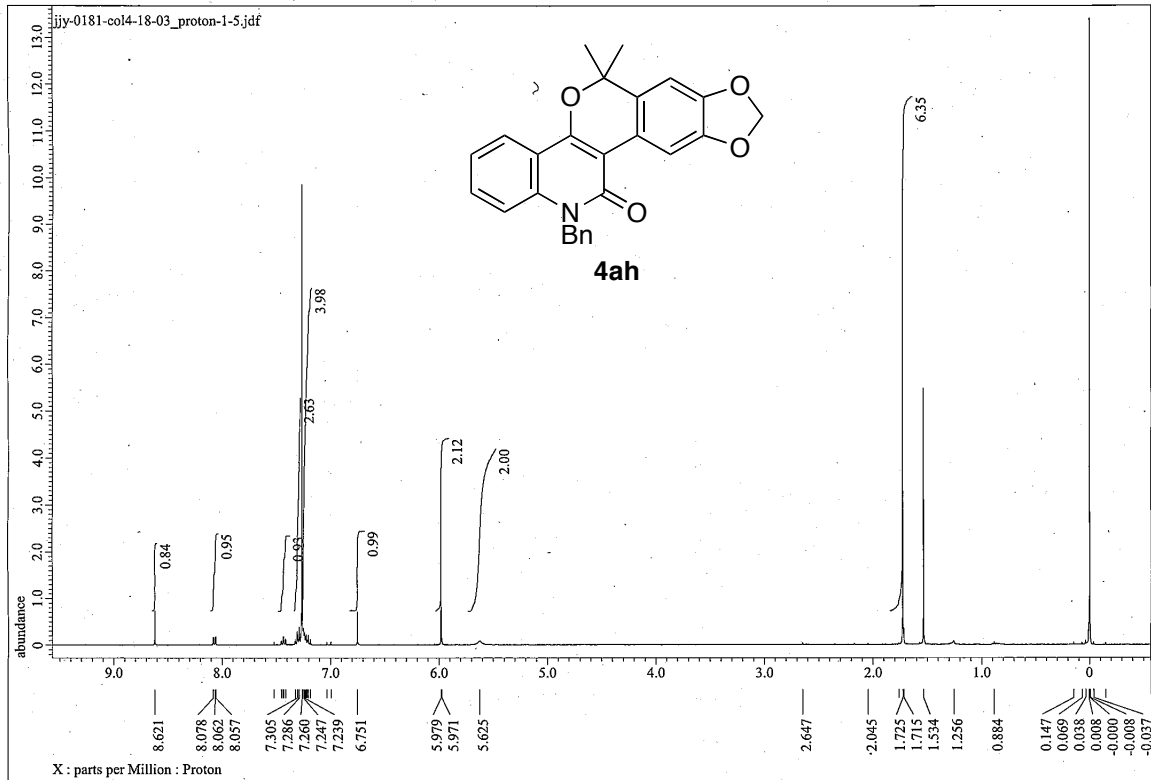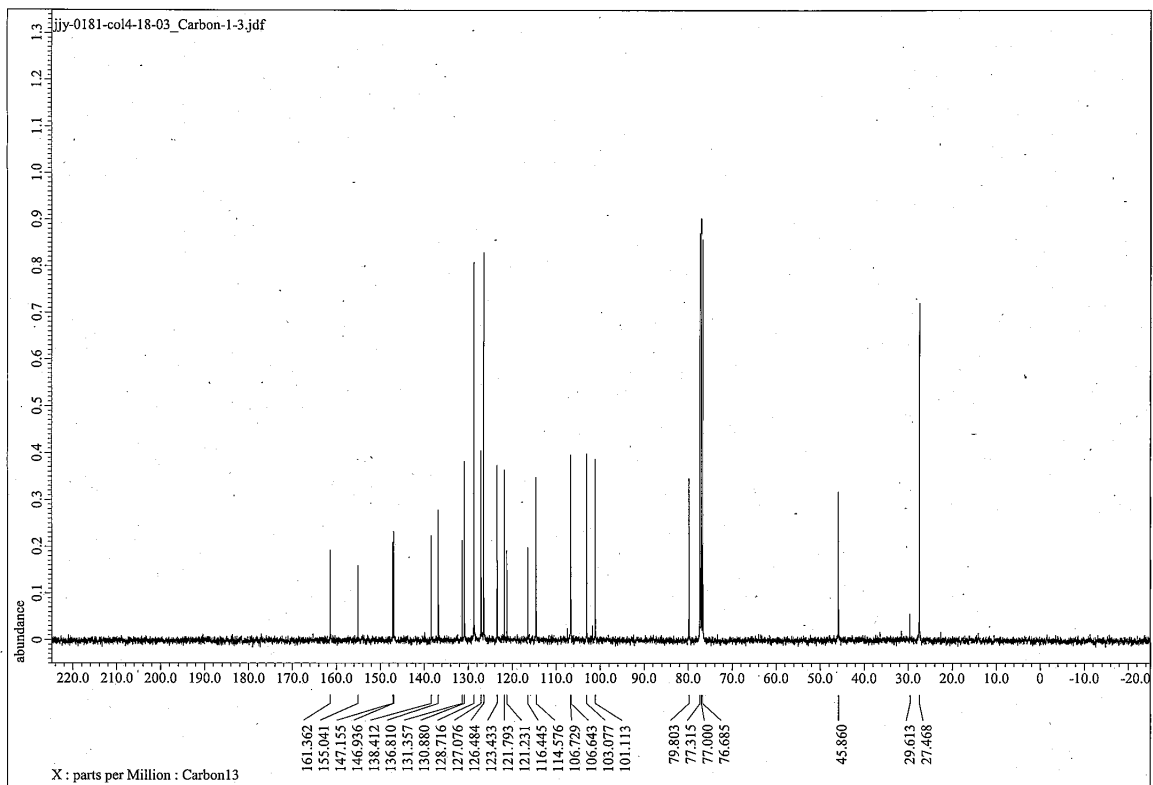

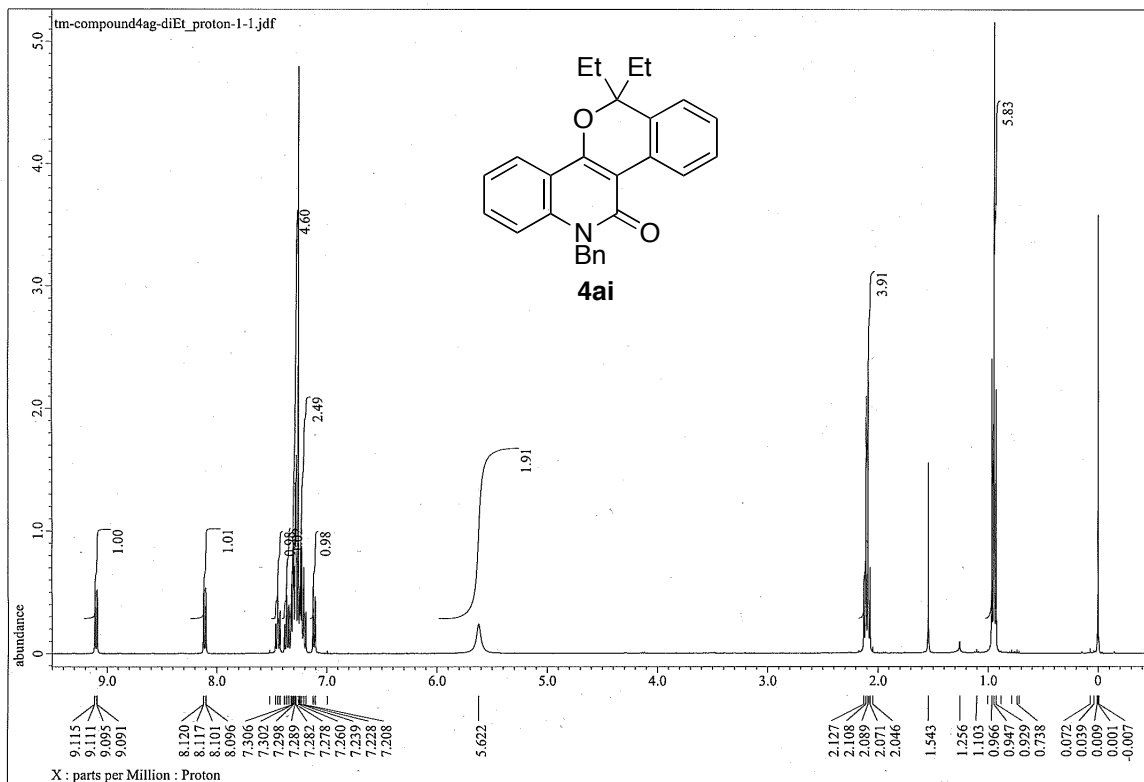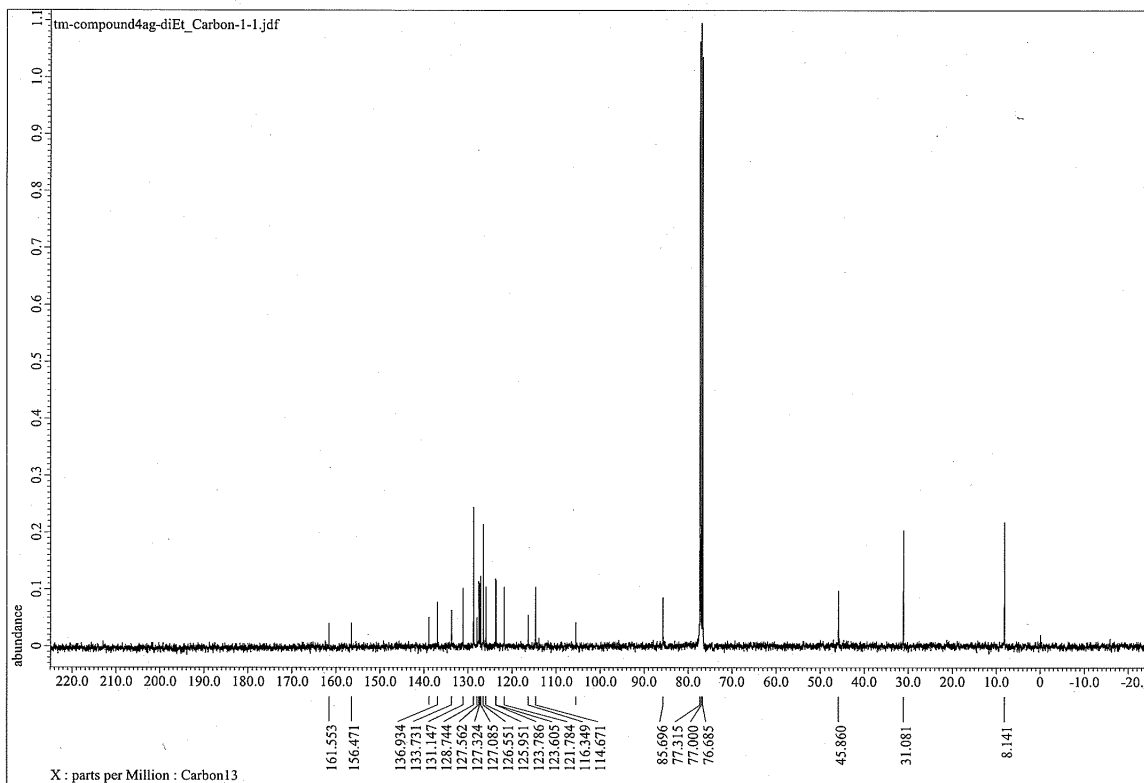

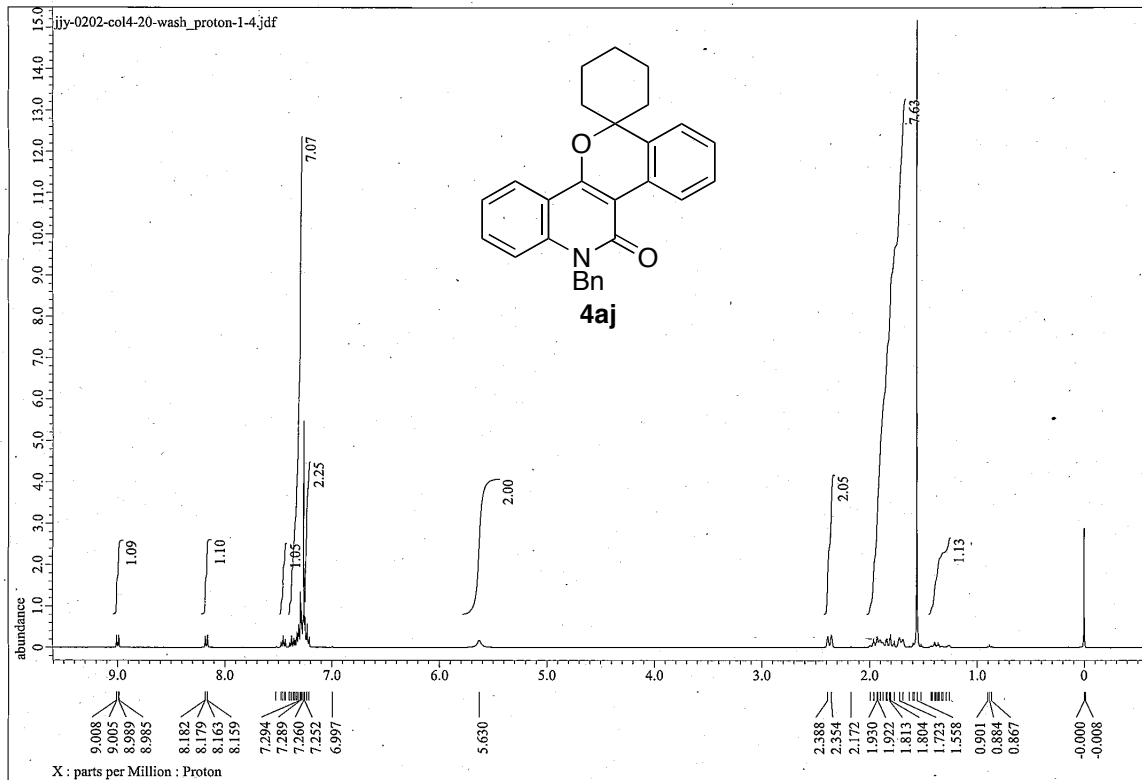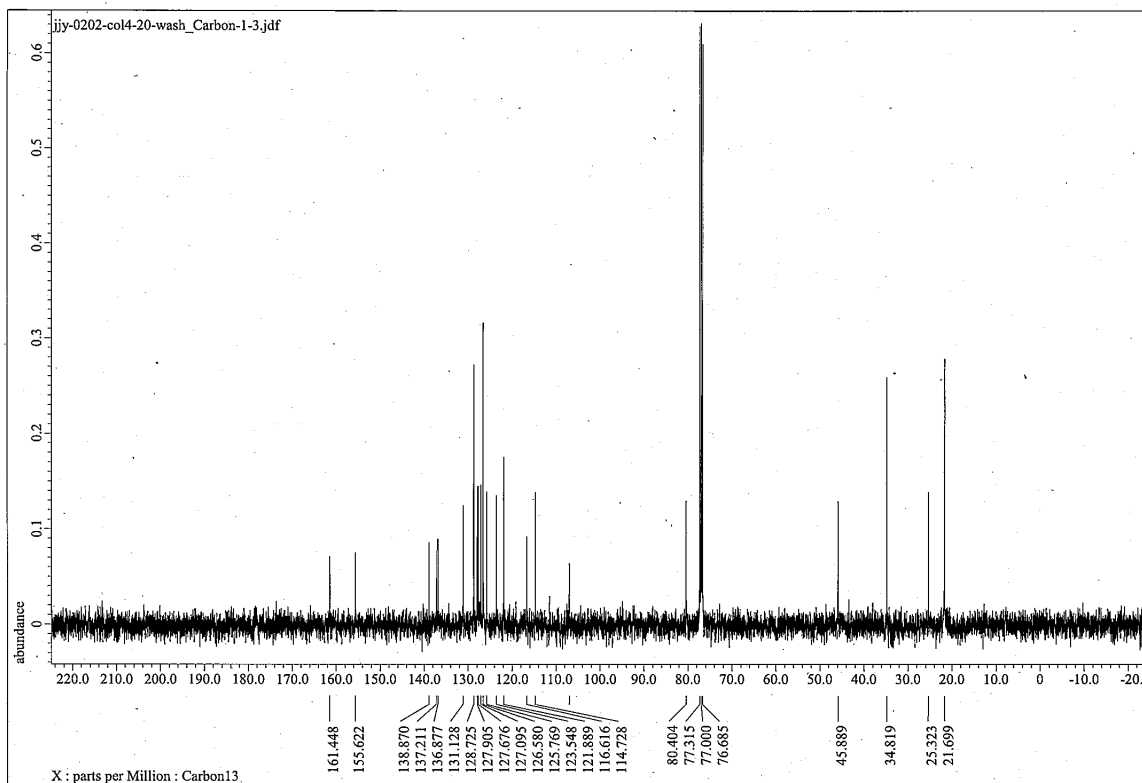

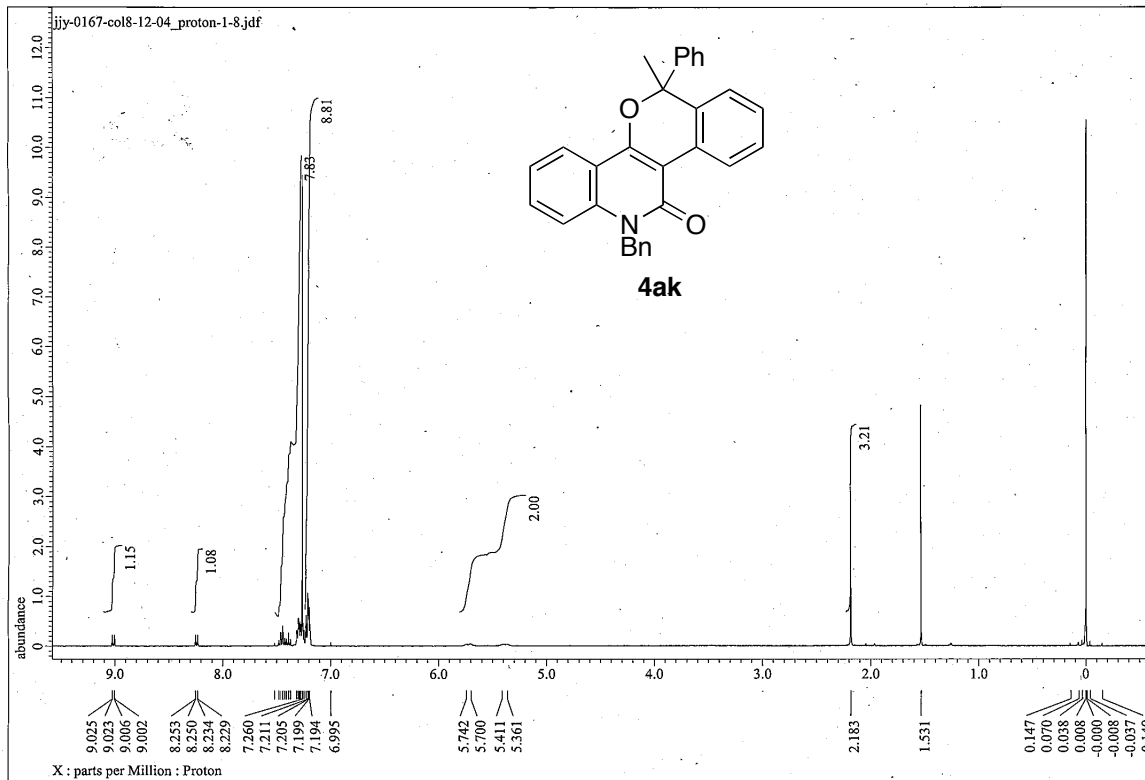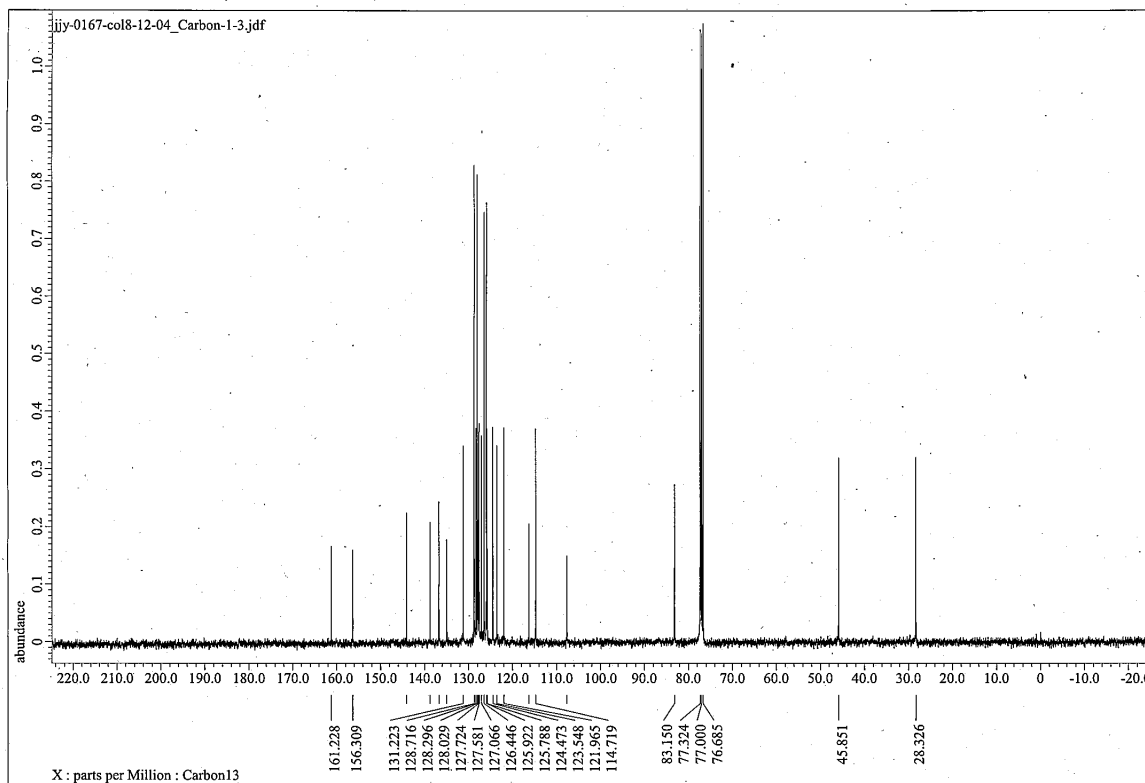

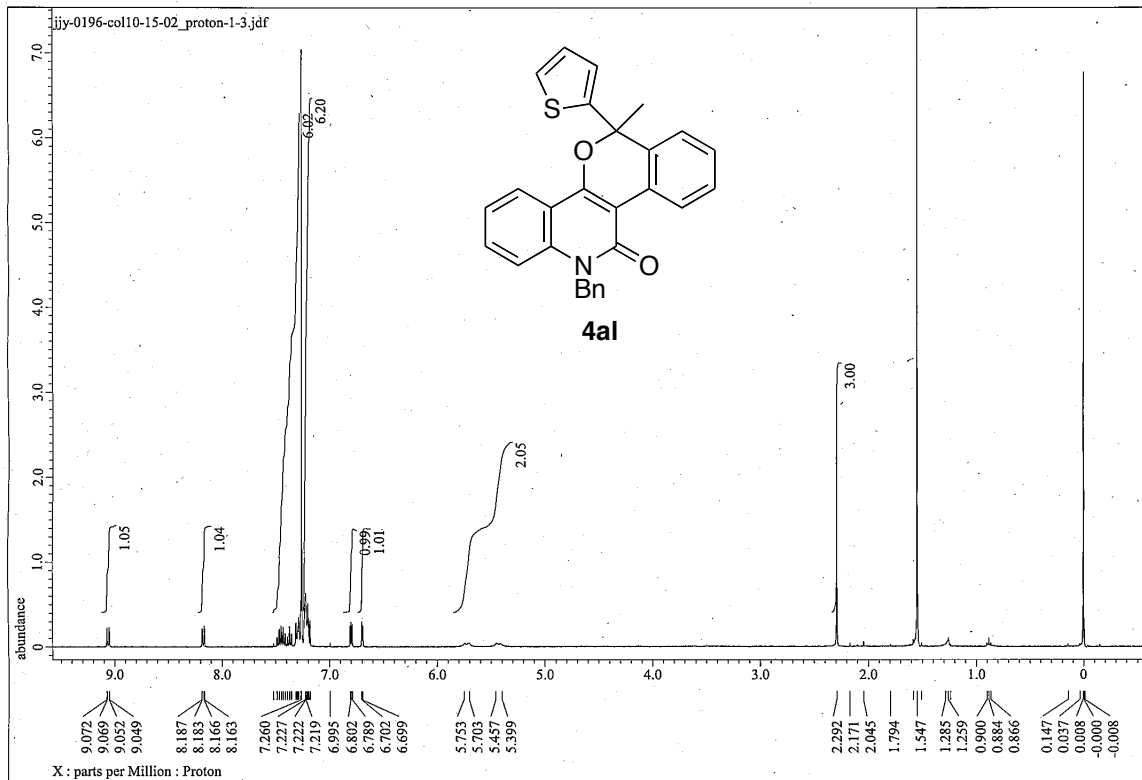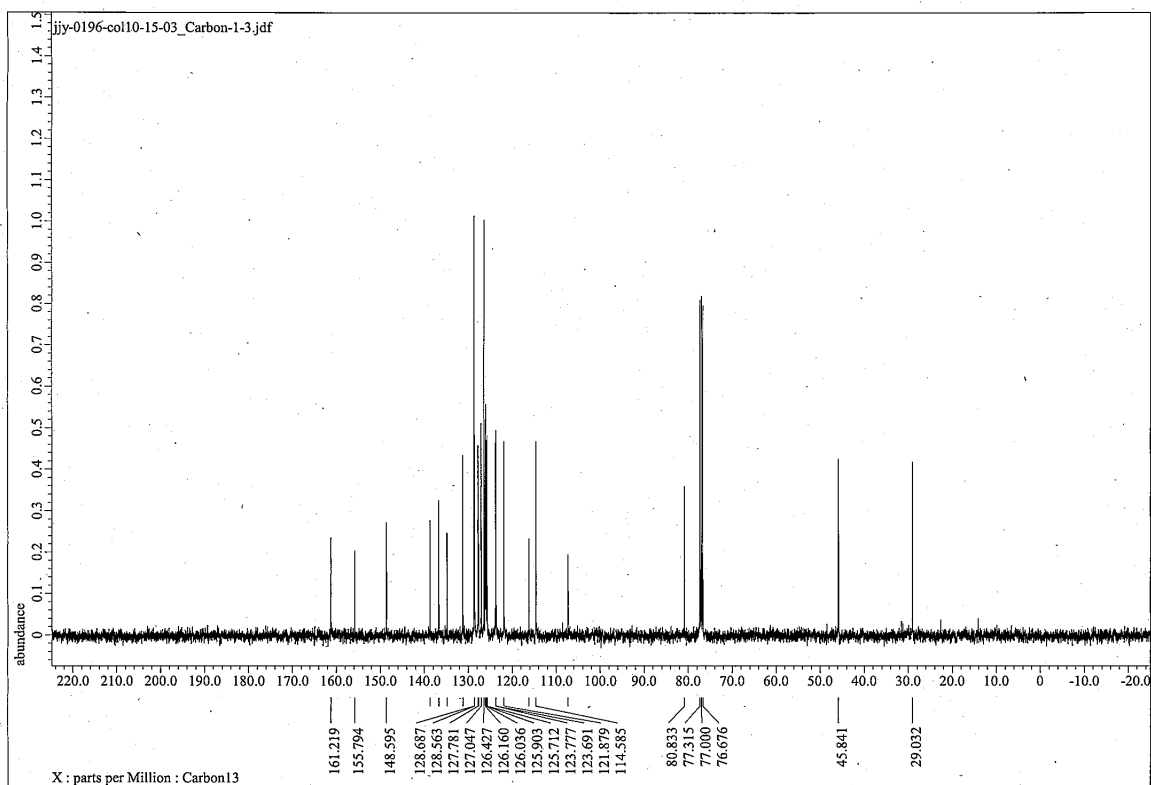

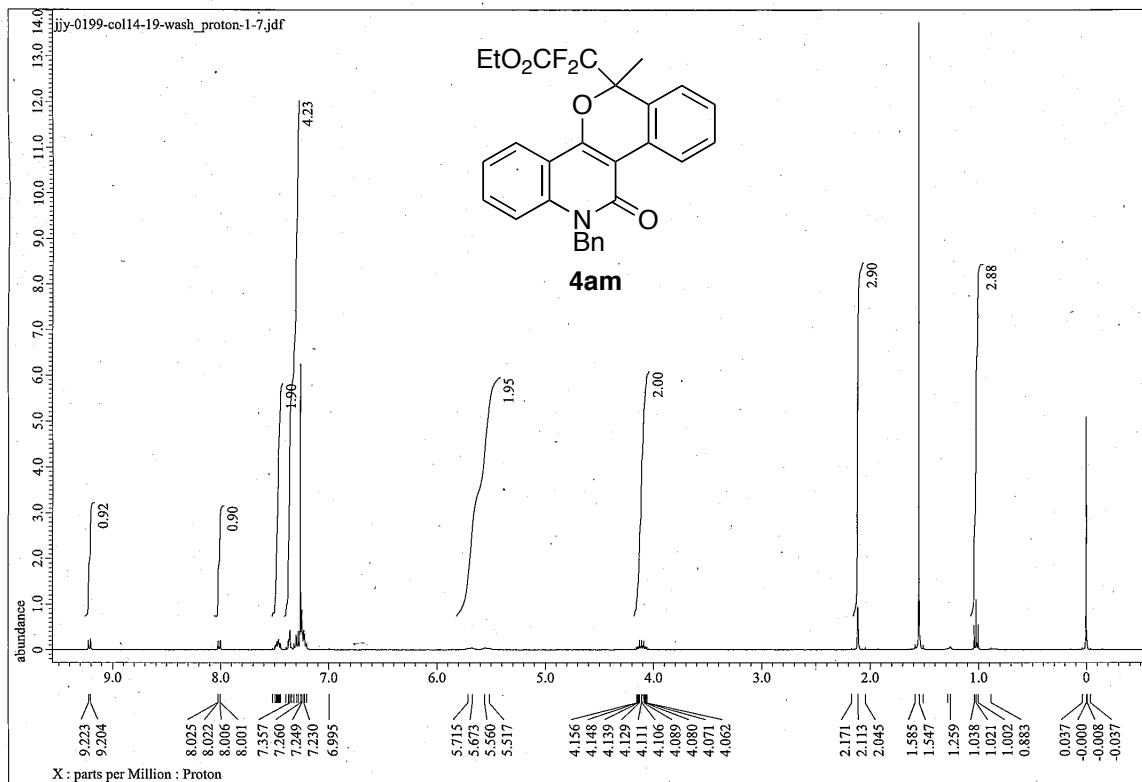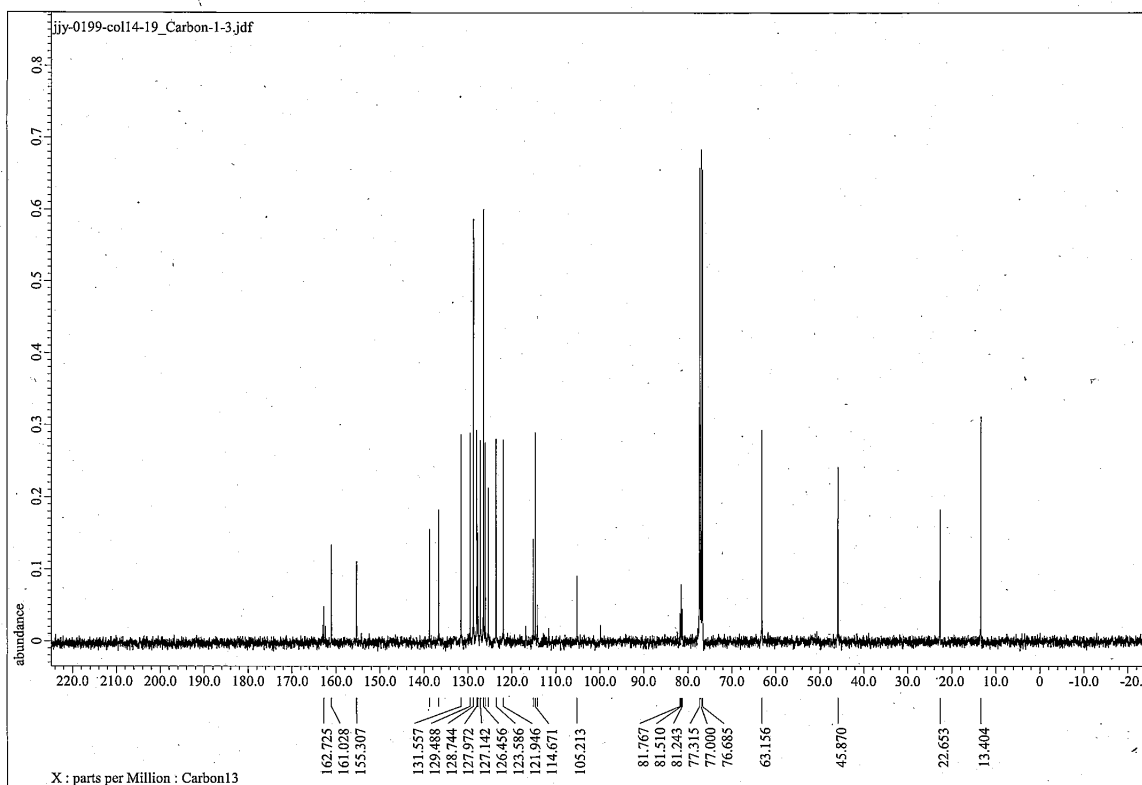

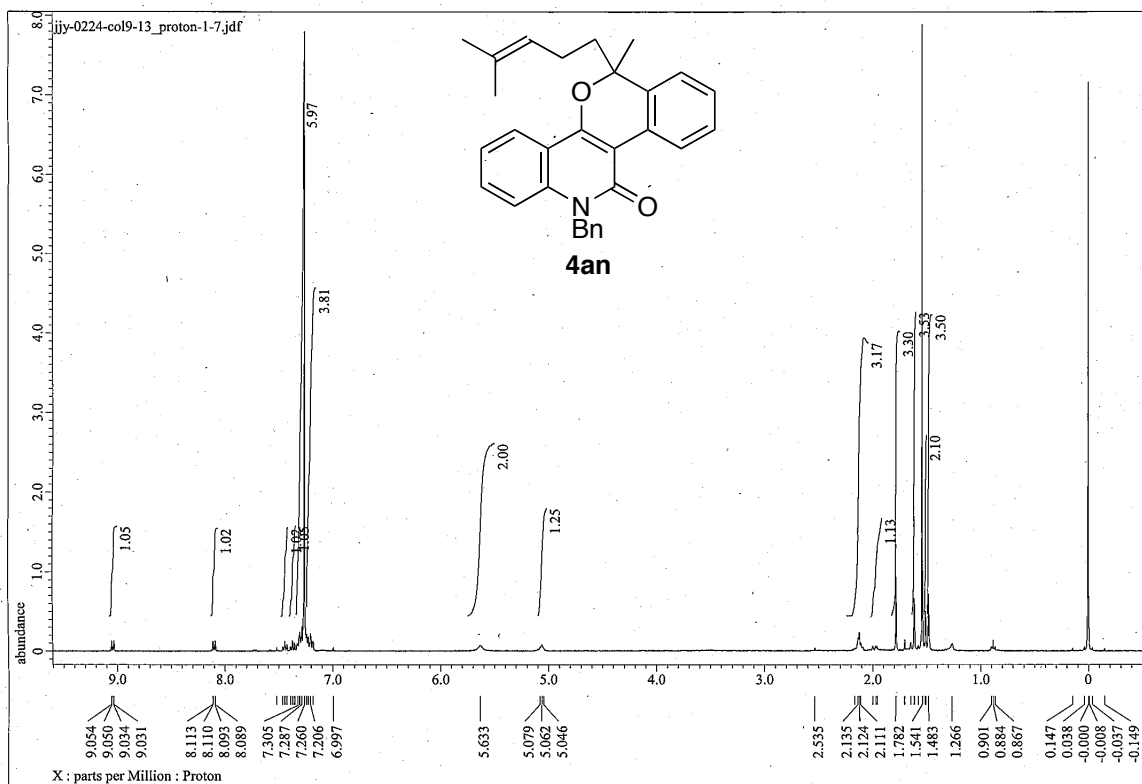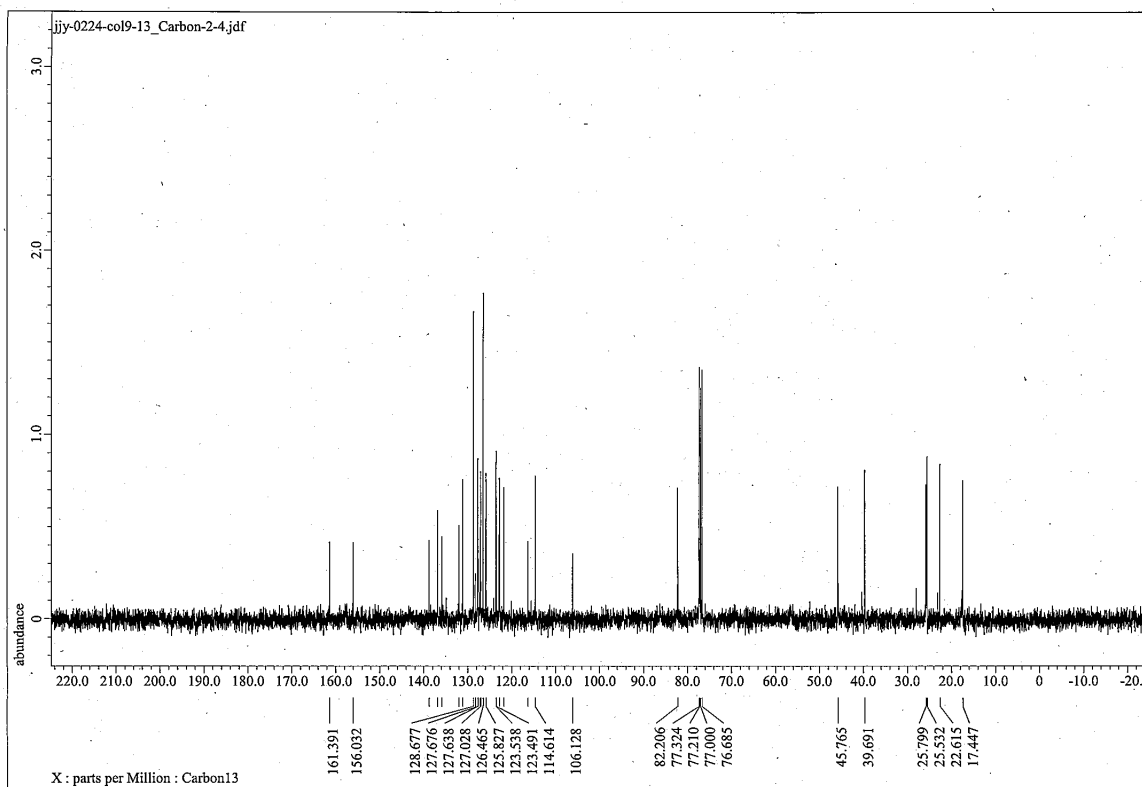



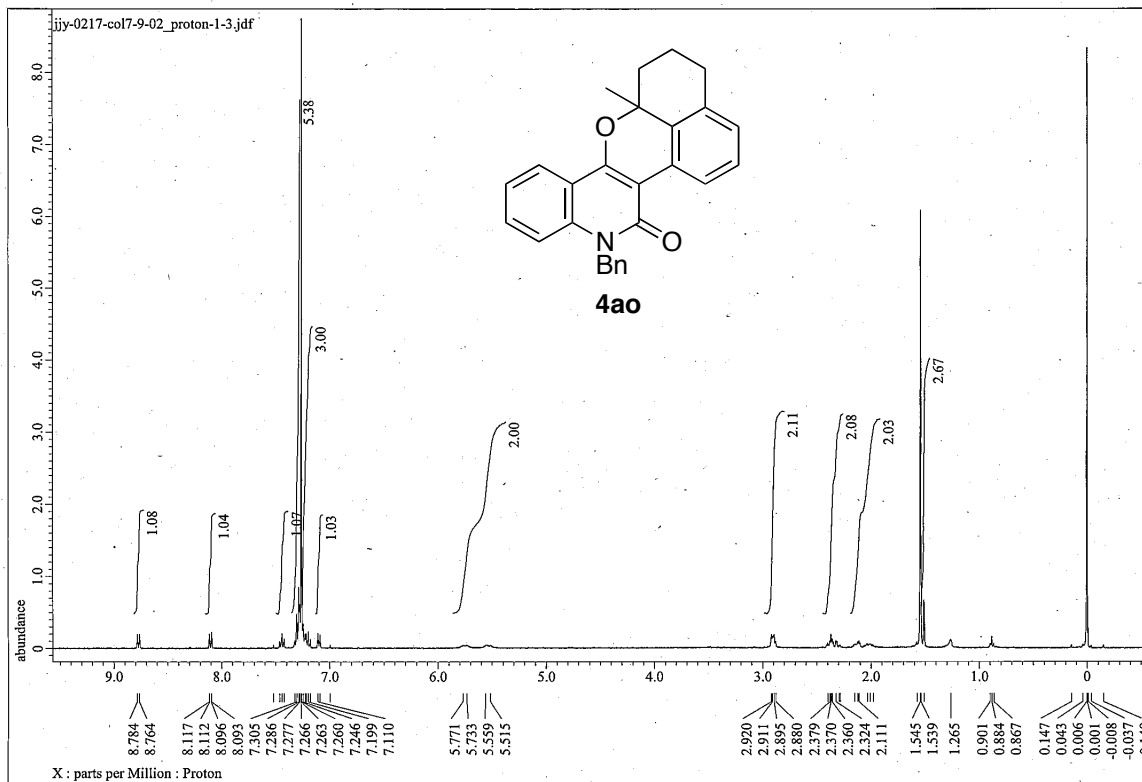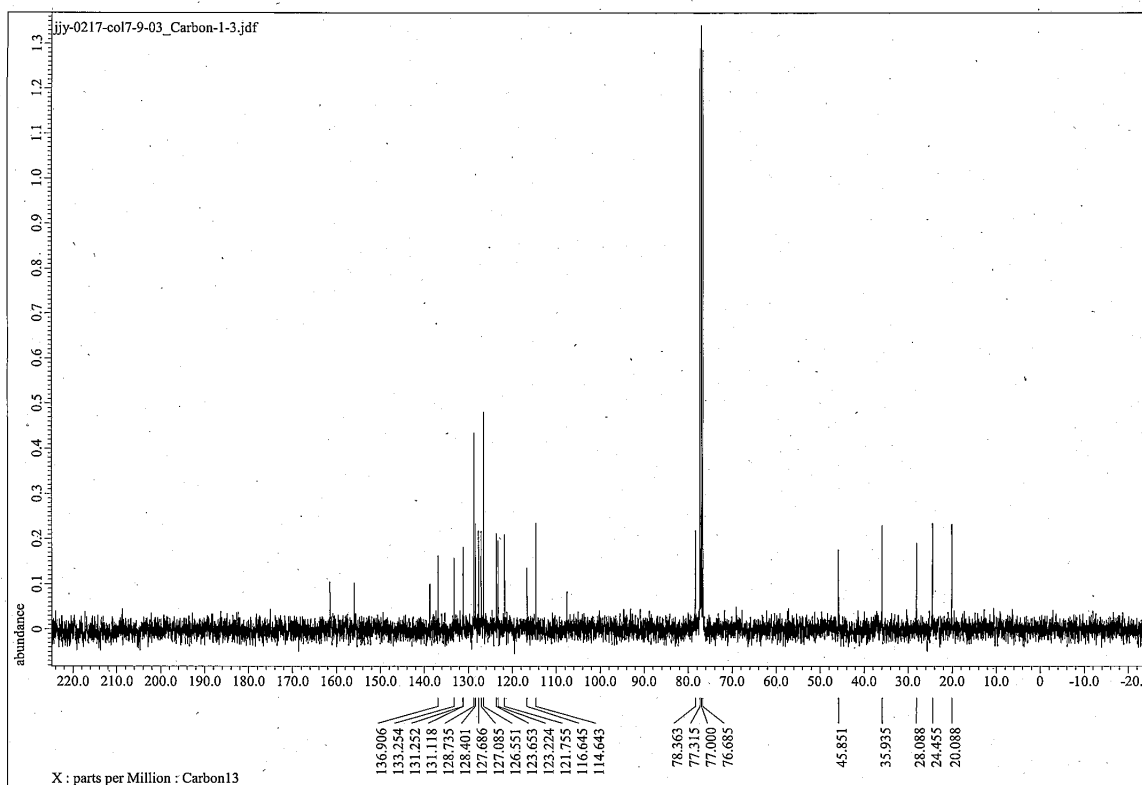

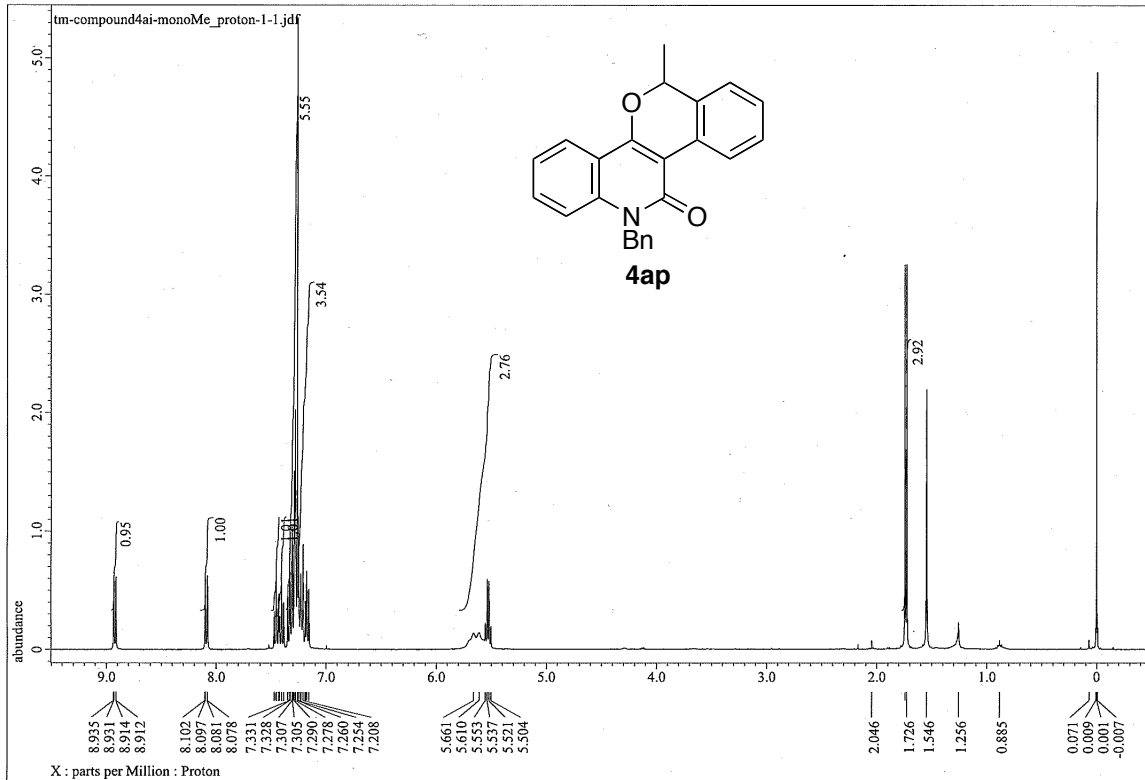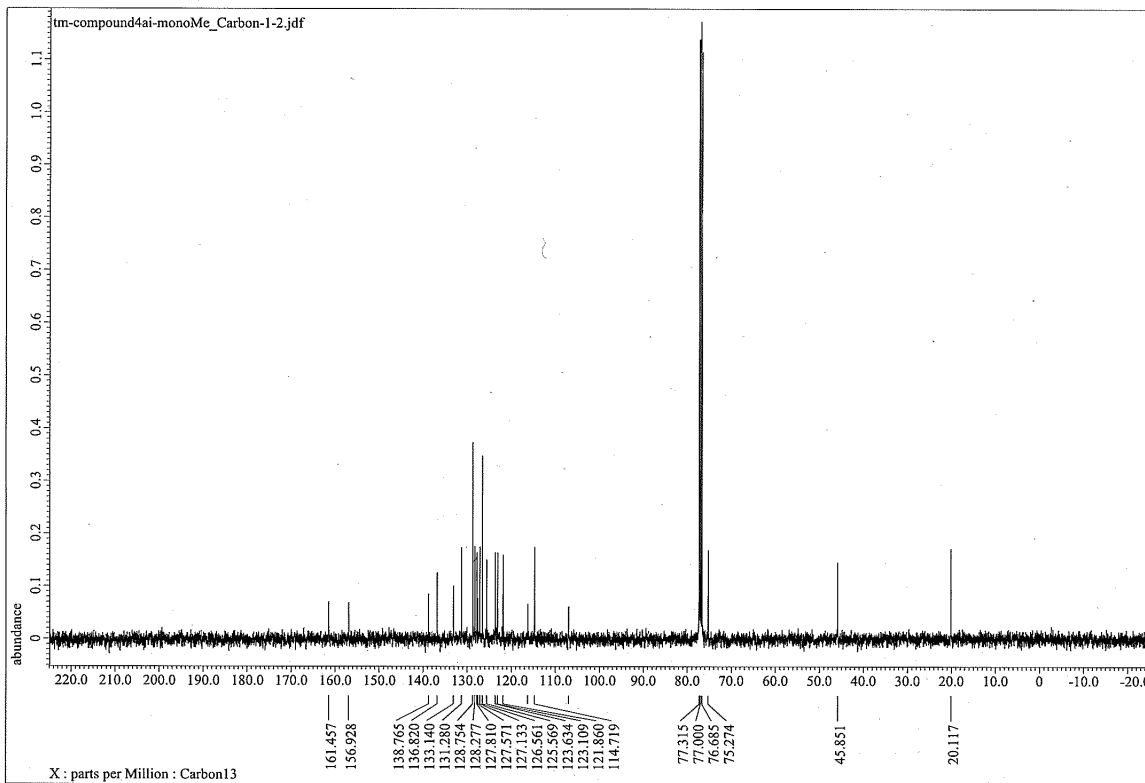

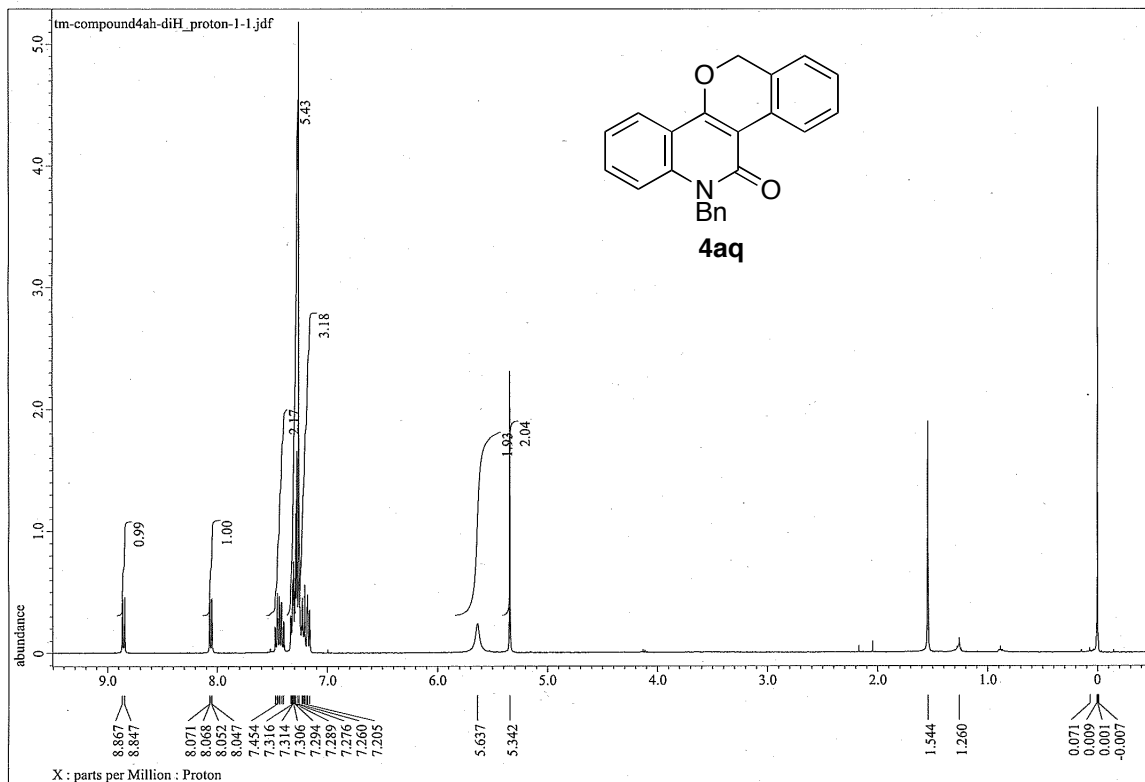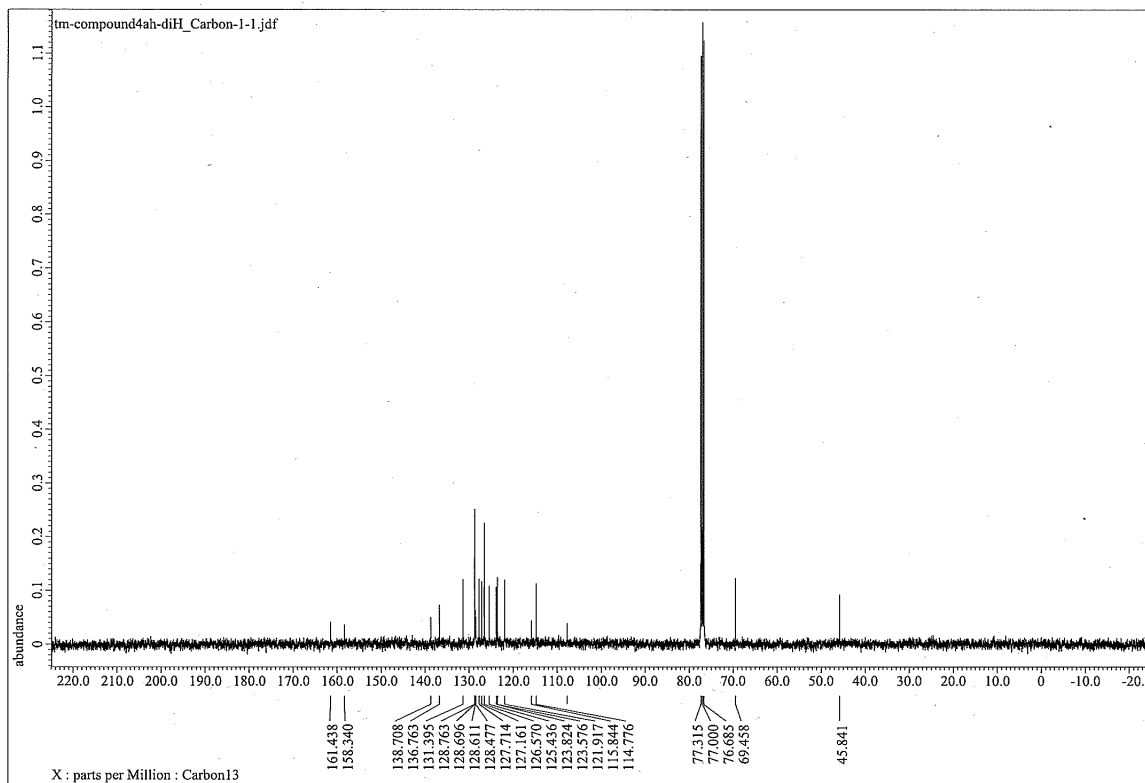

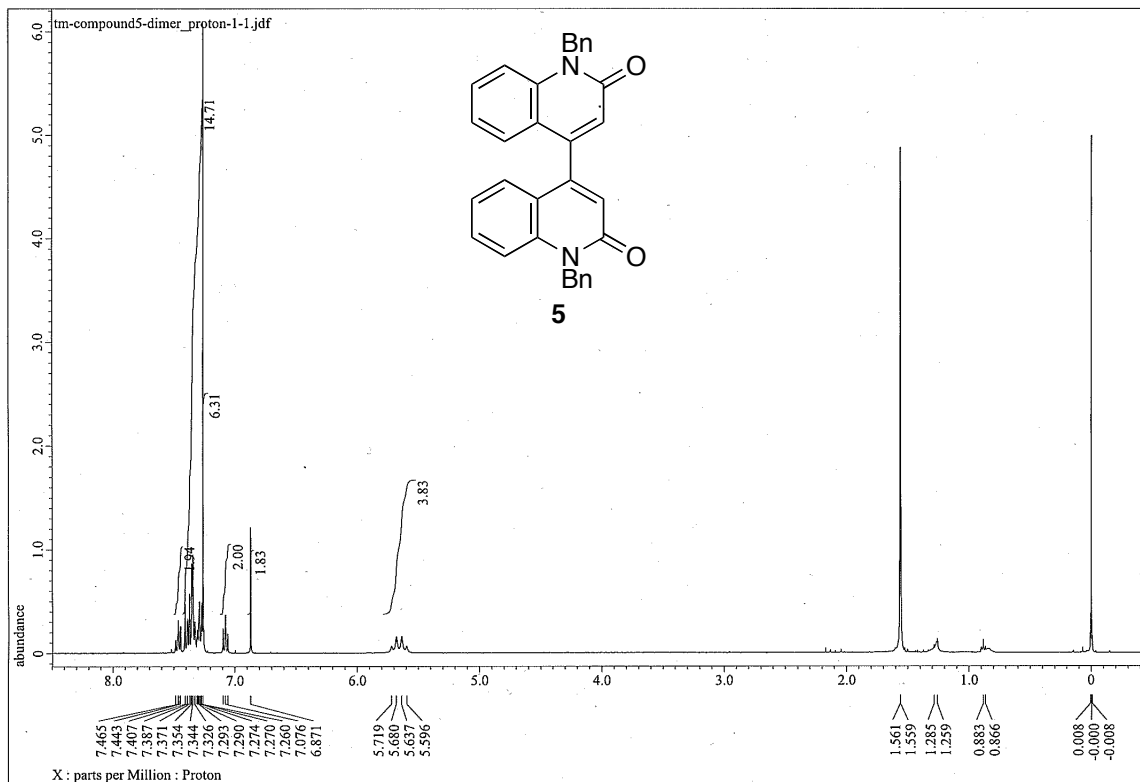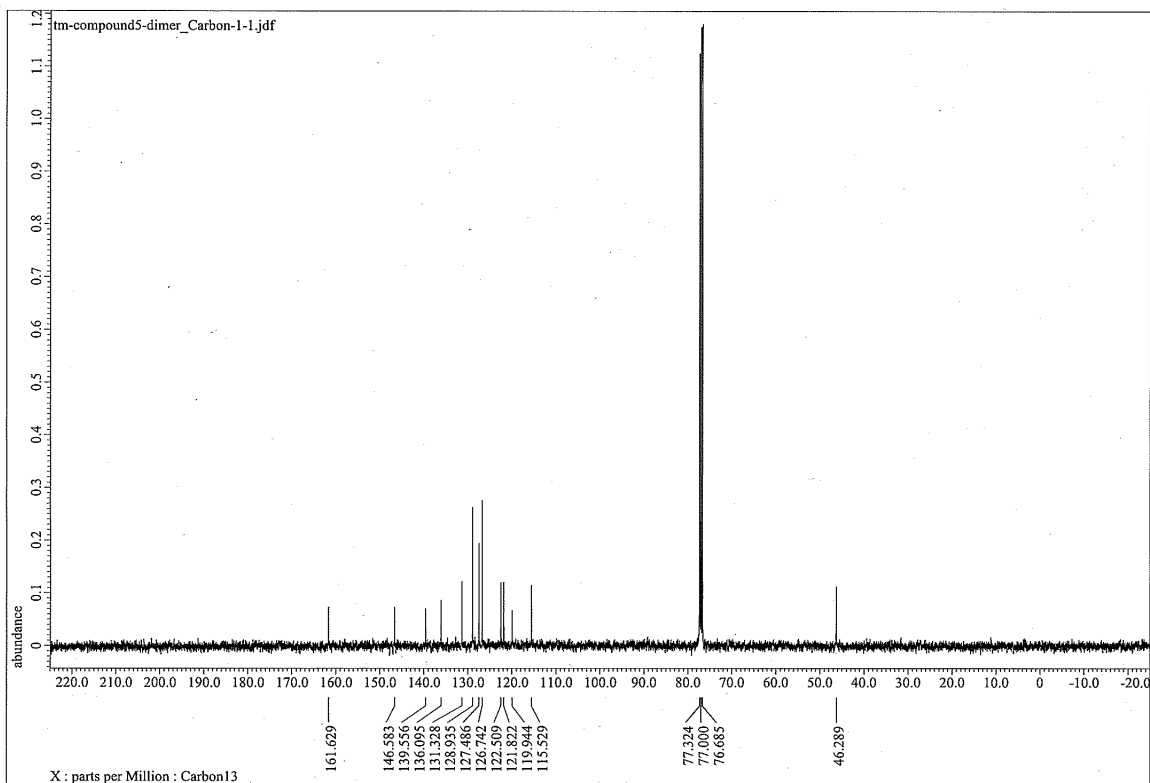

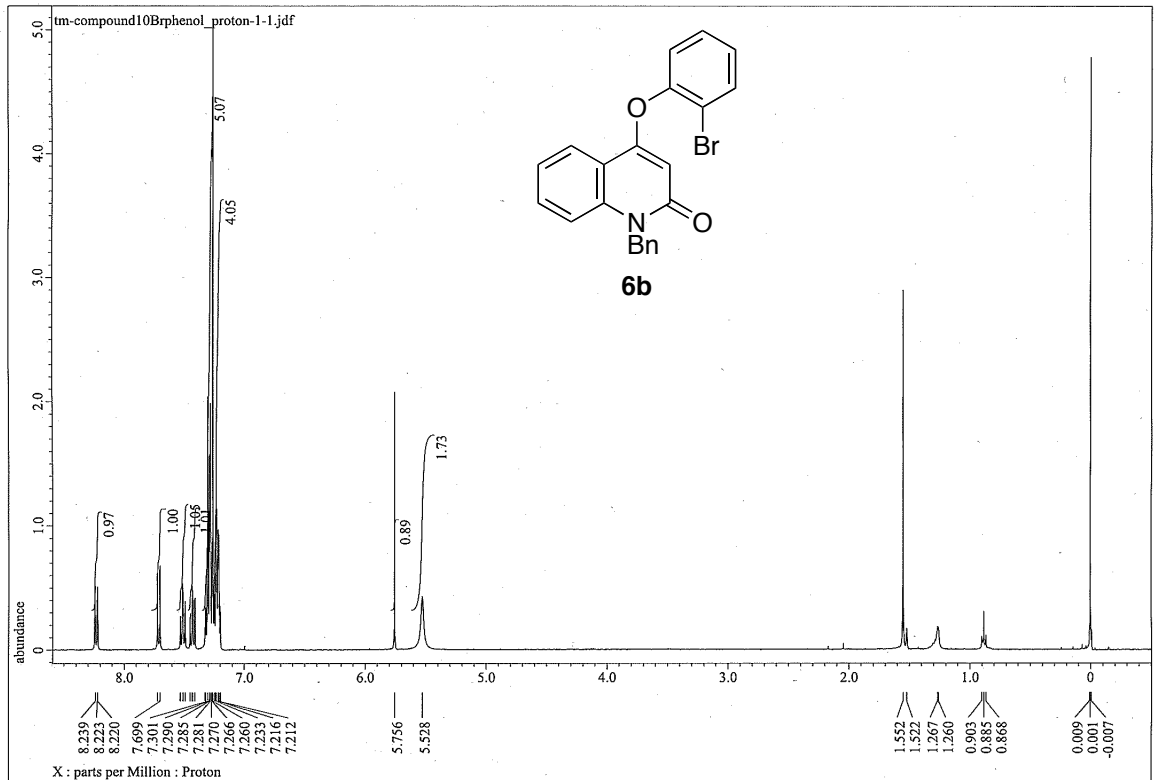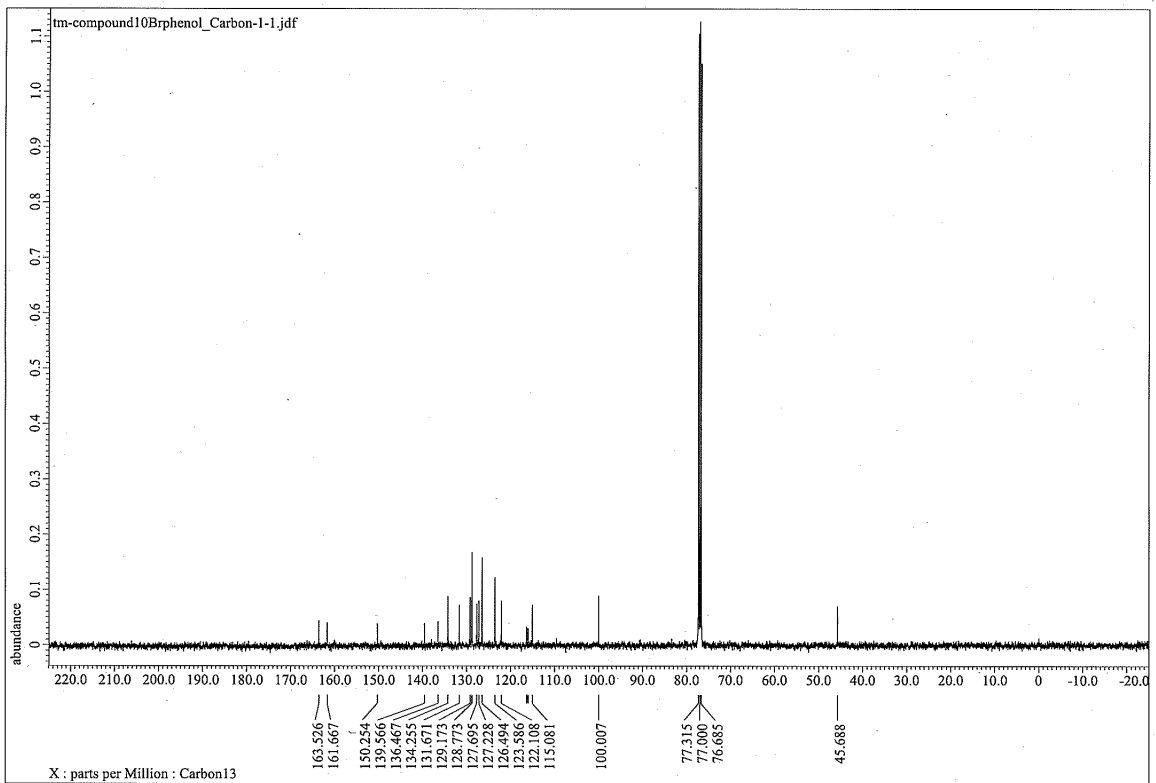

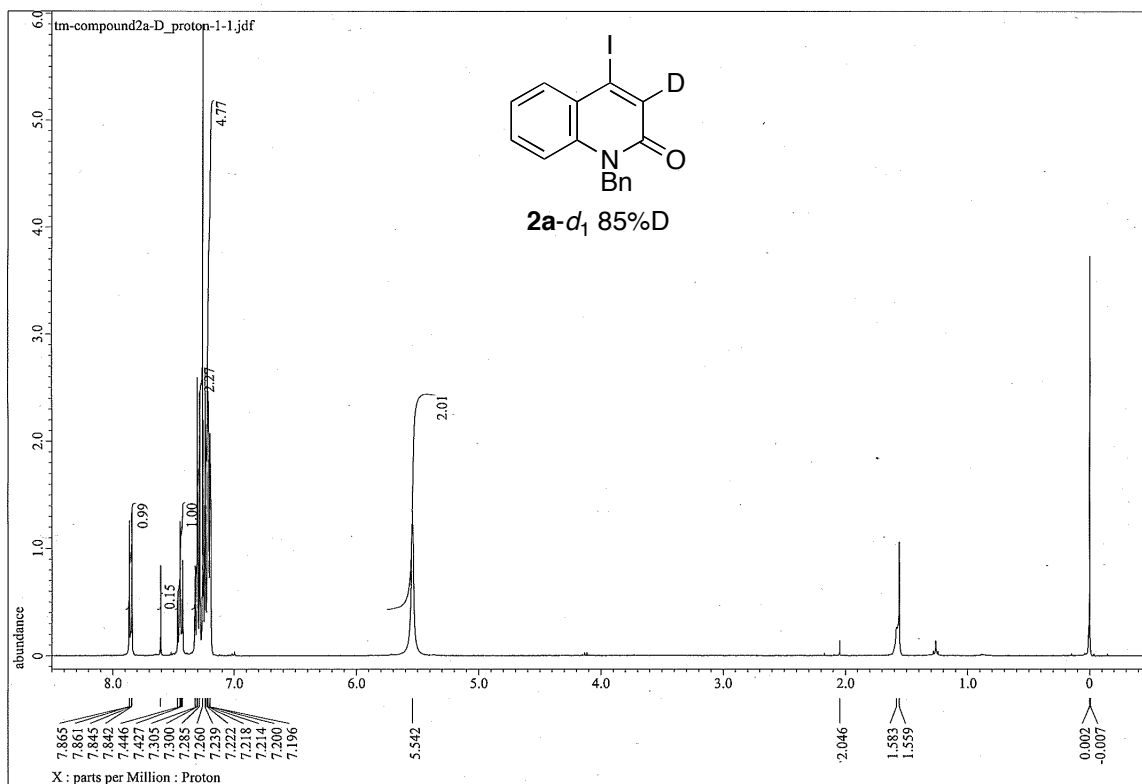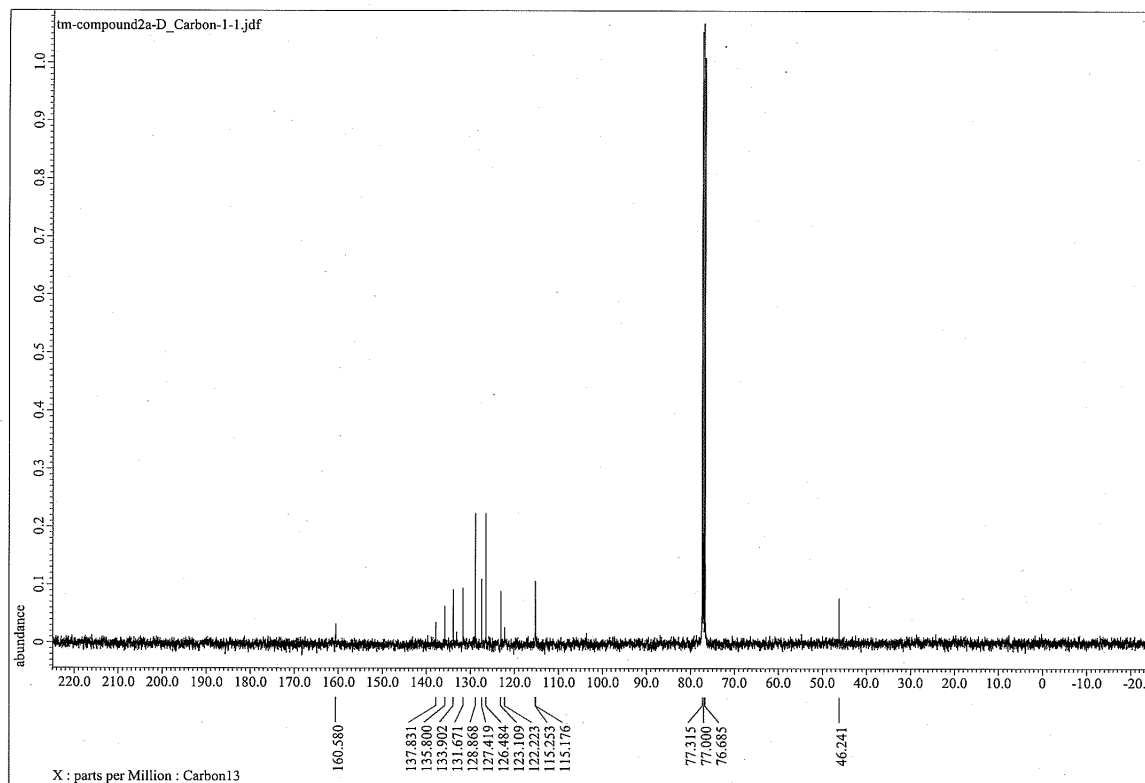

# Data for Scheme 5

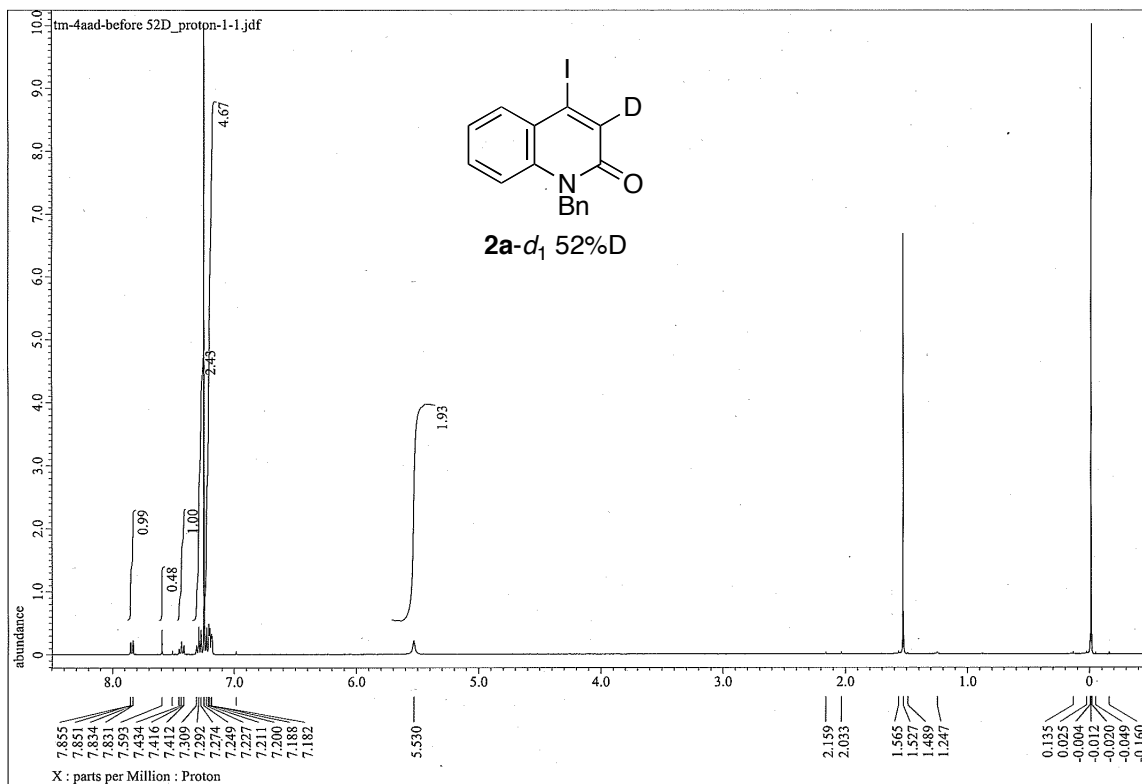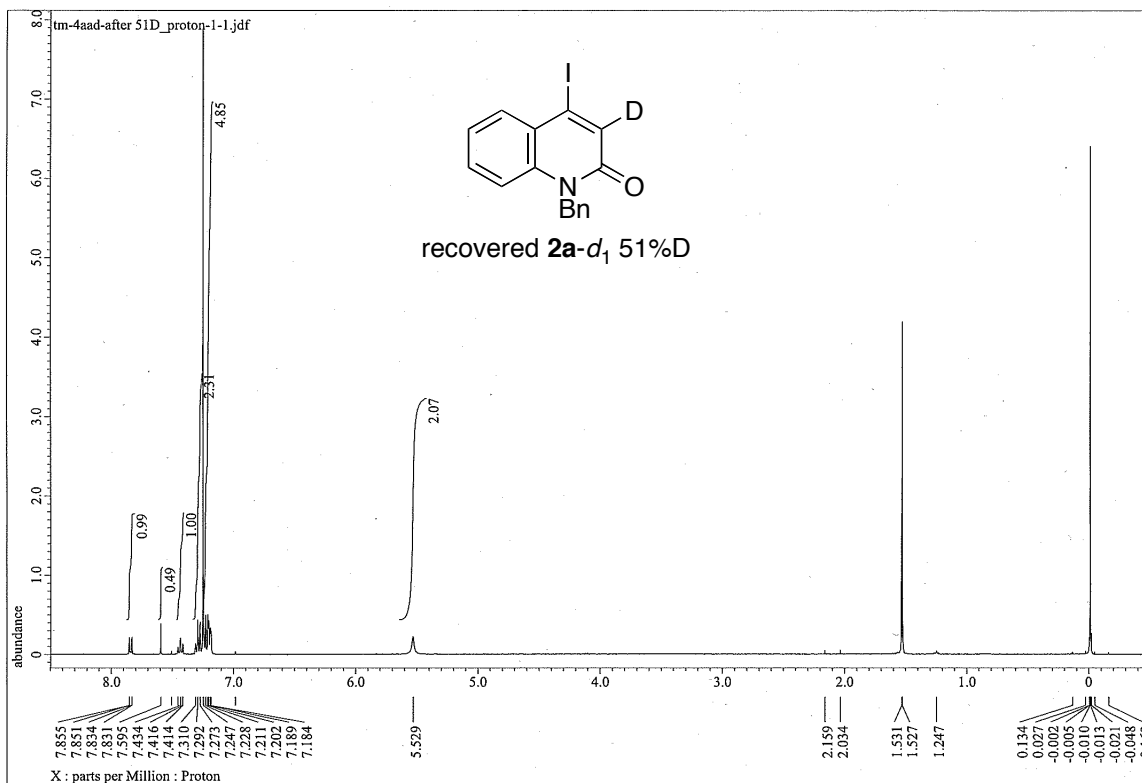

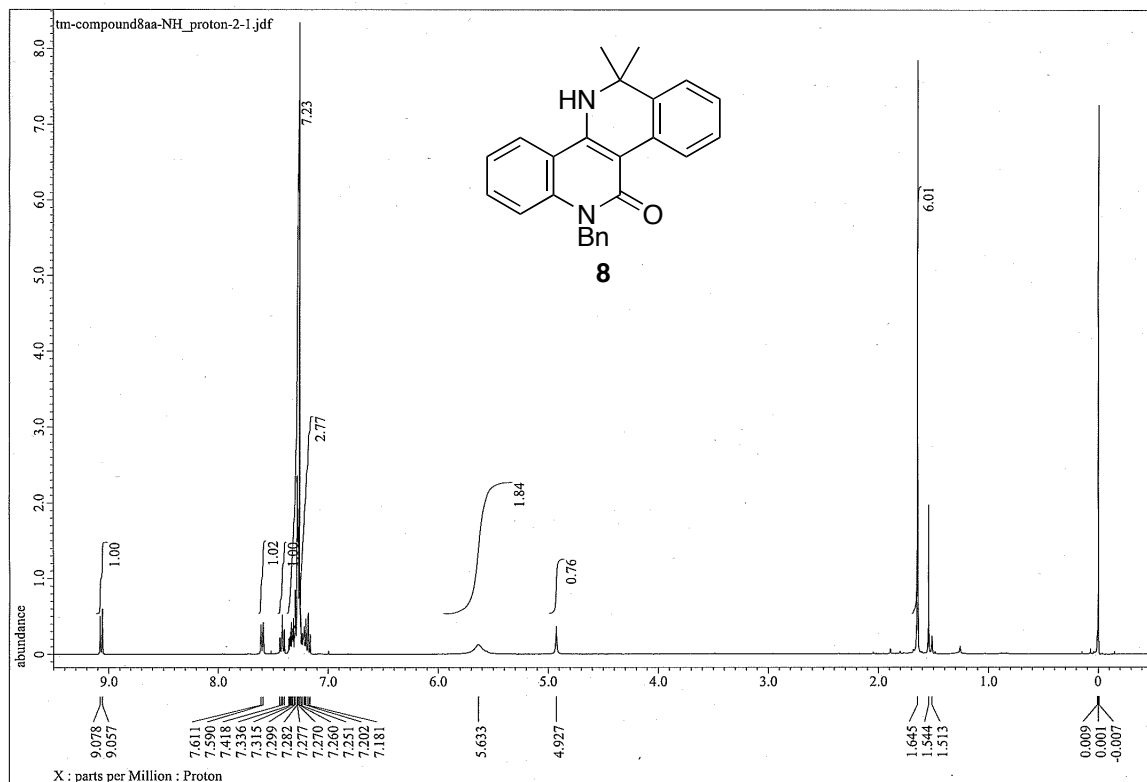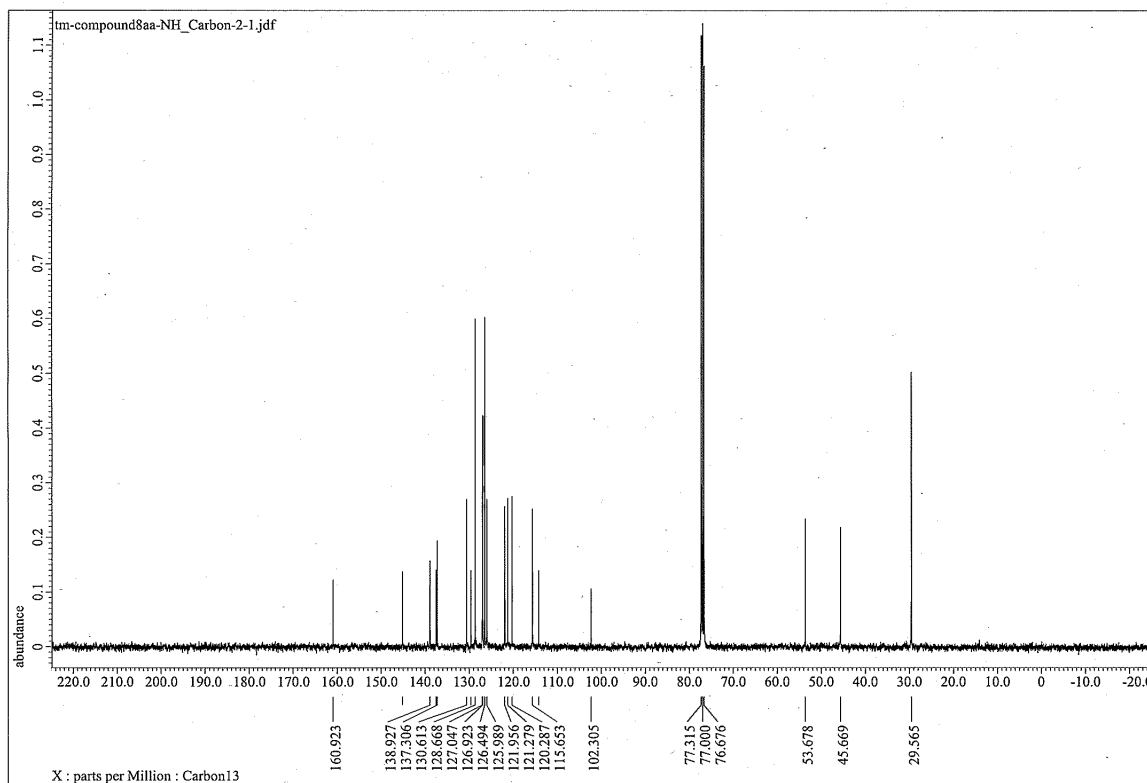



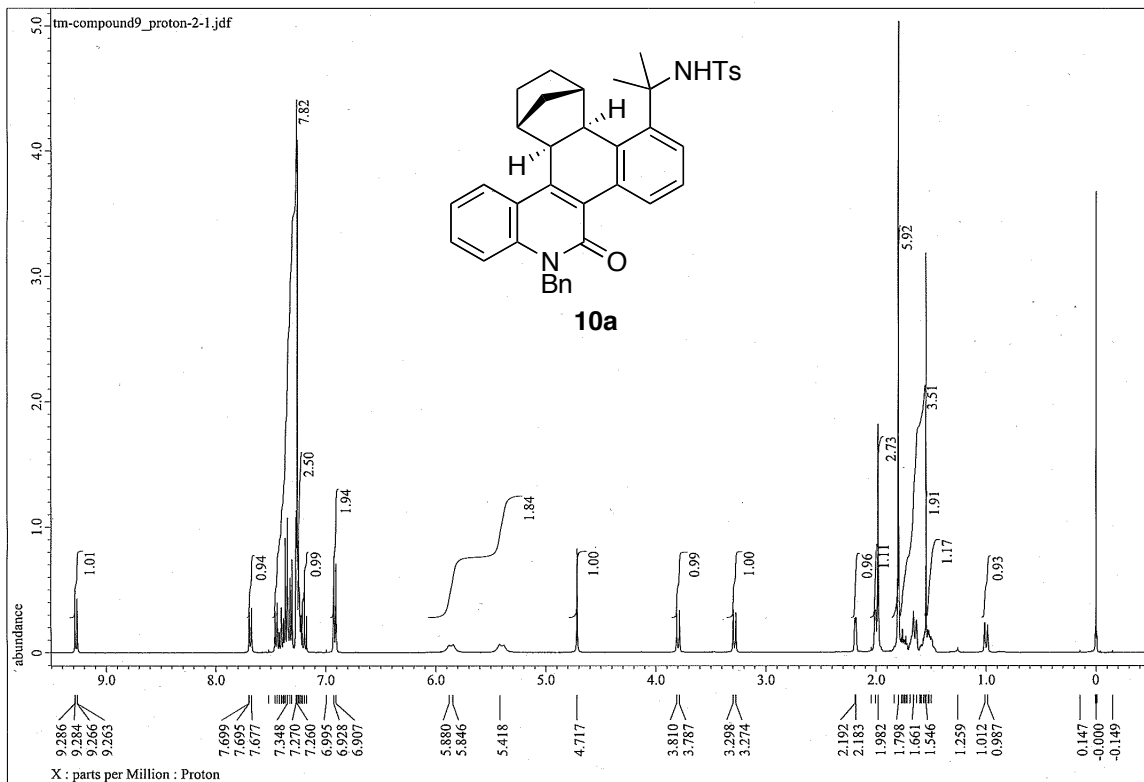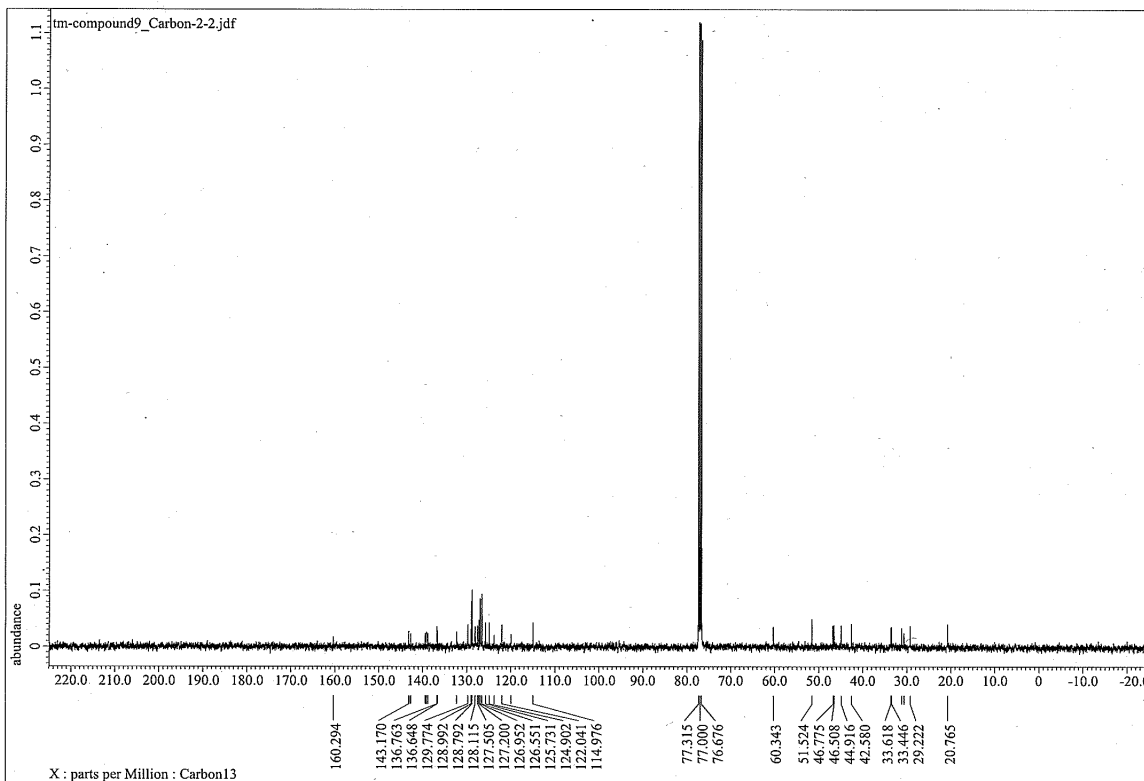

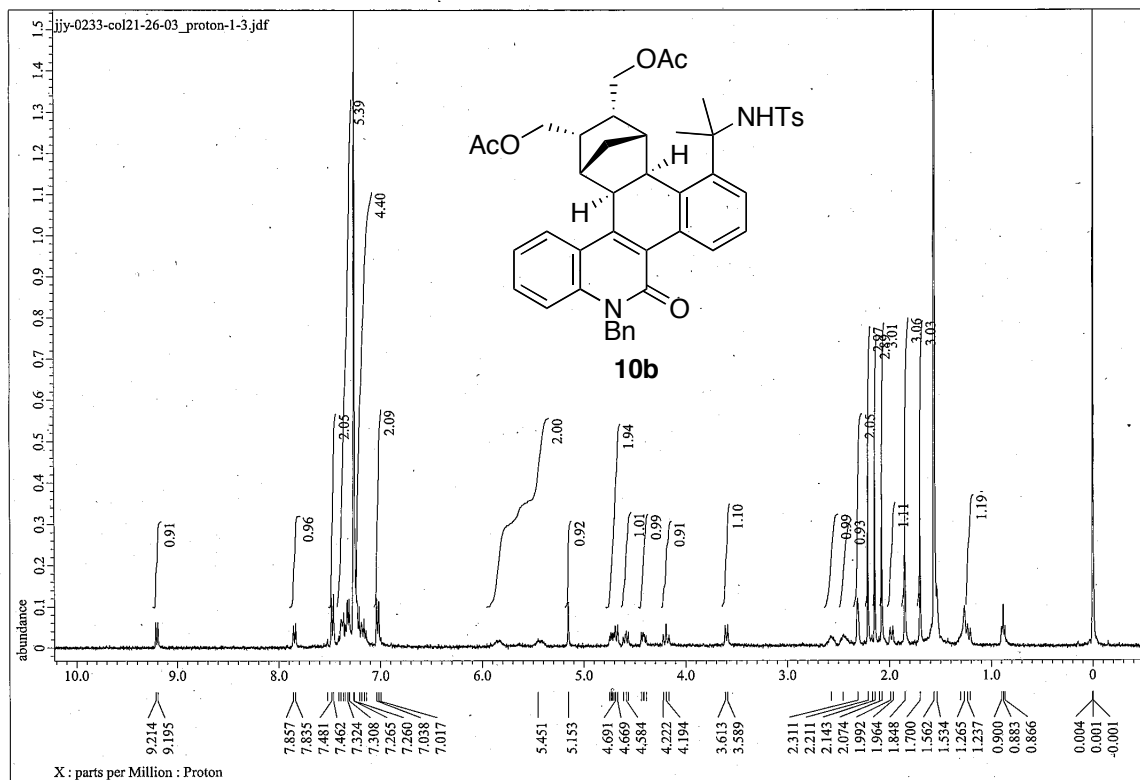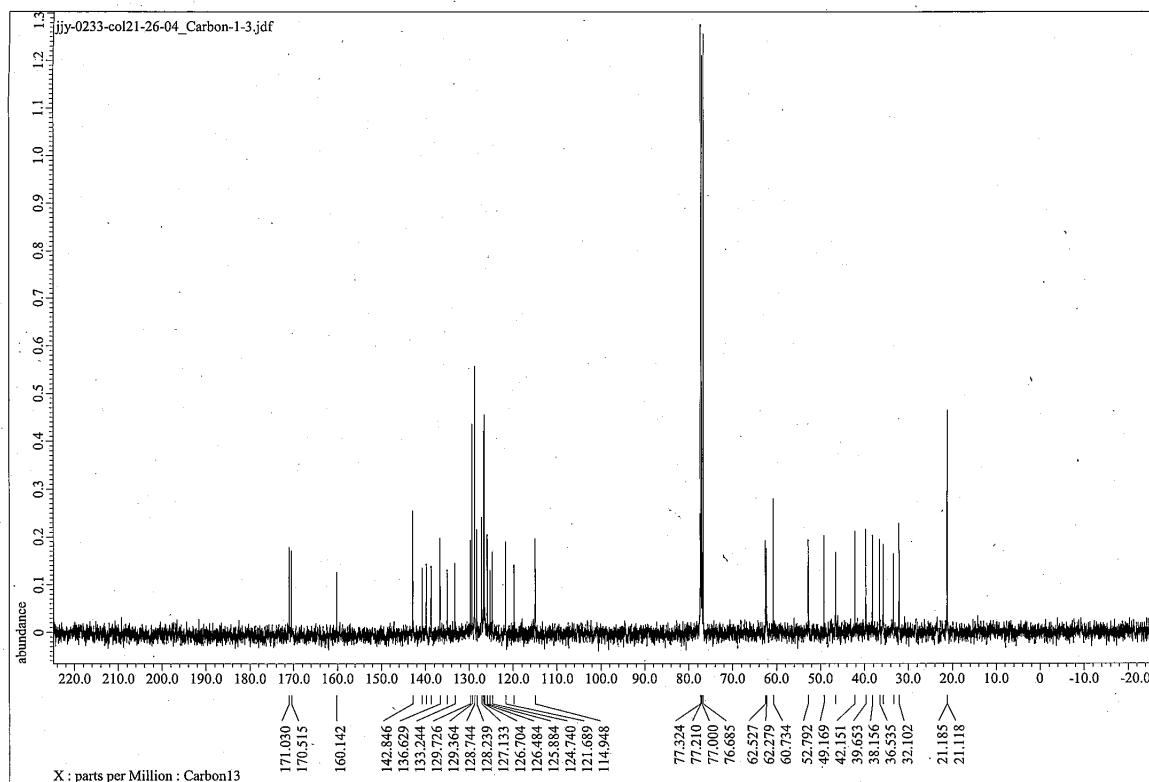

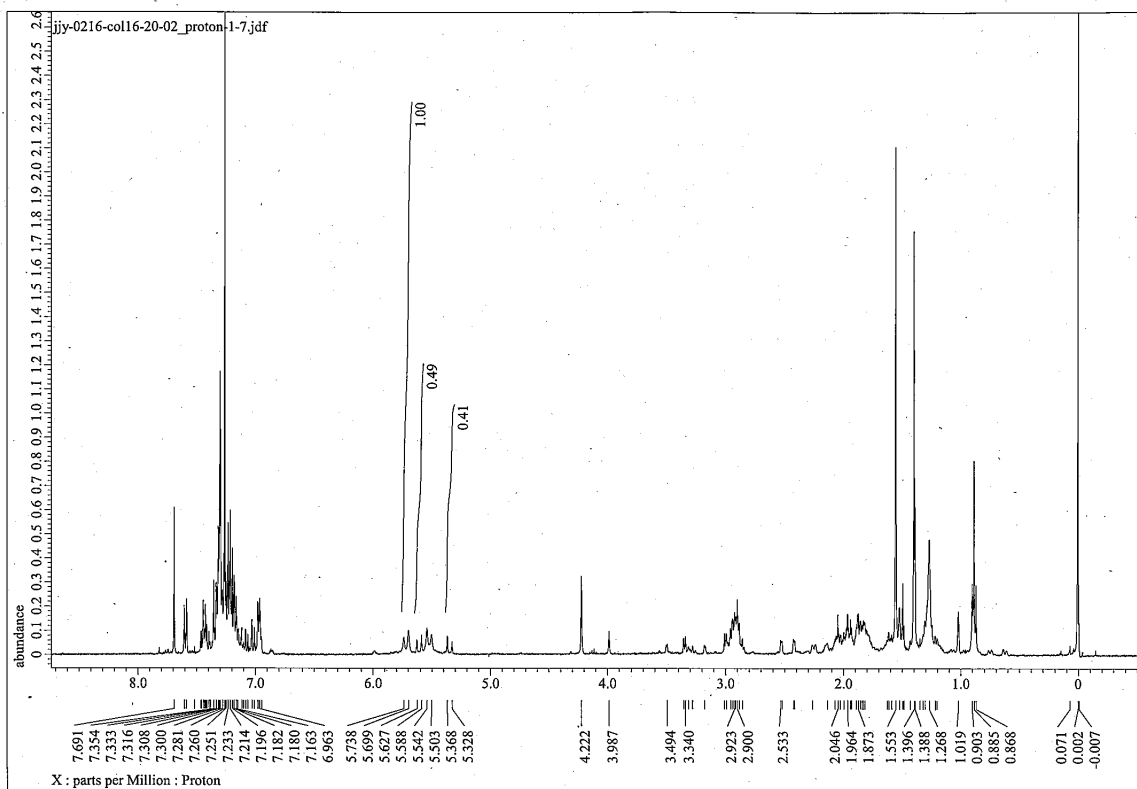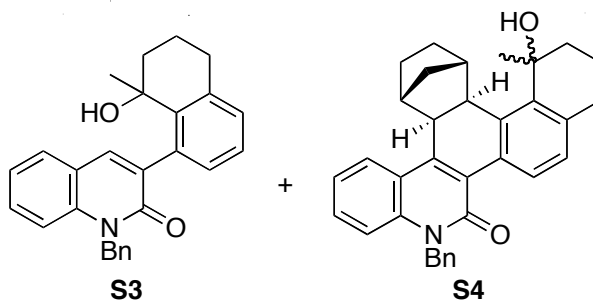

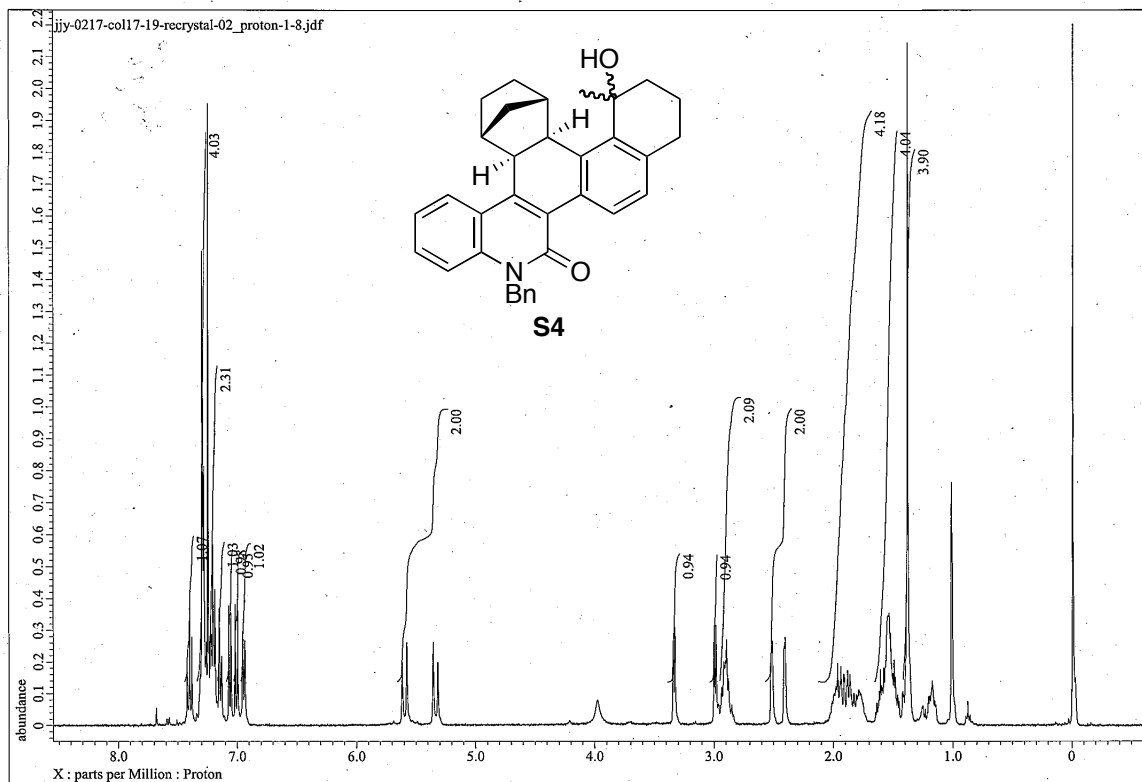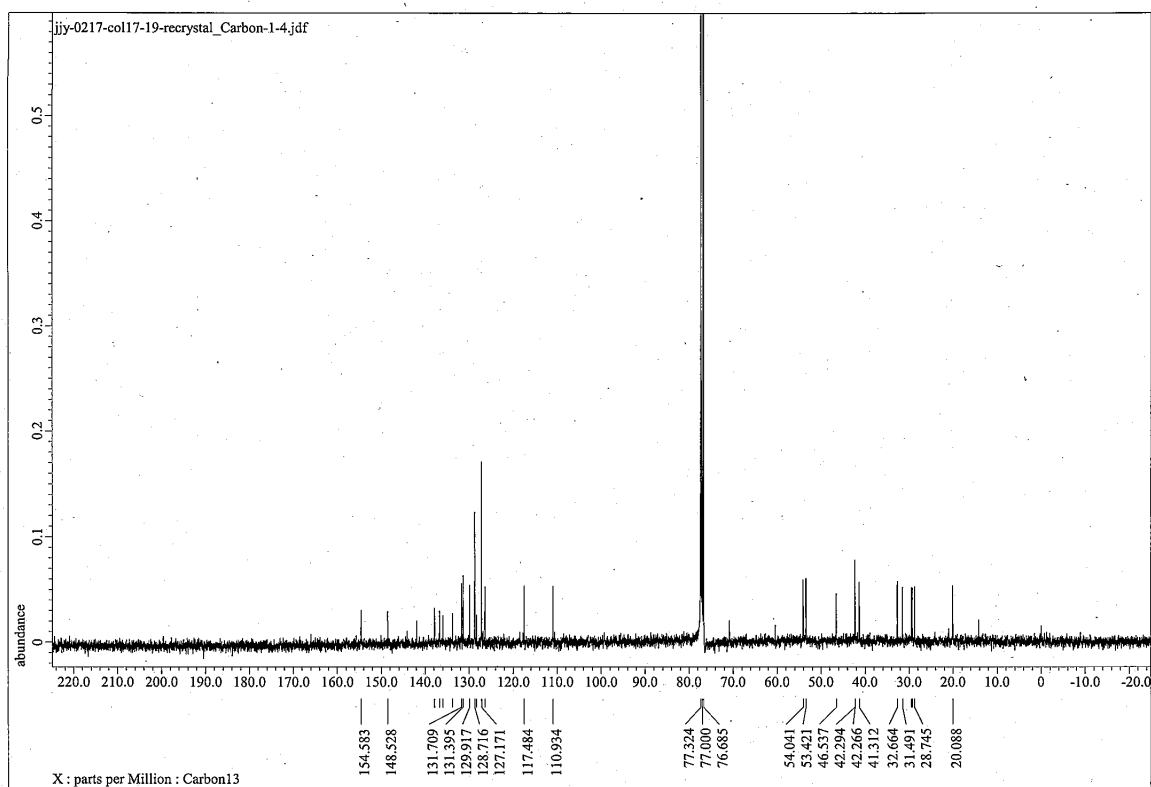

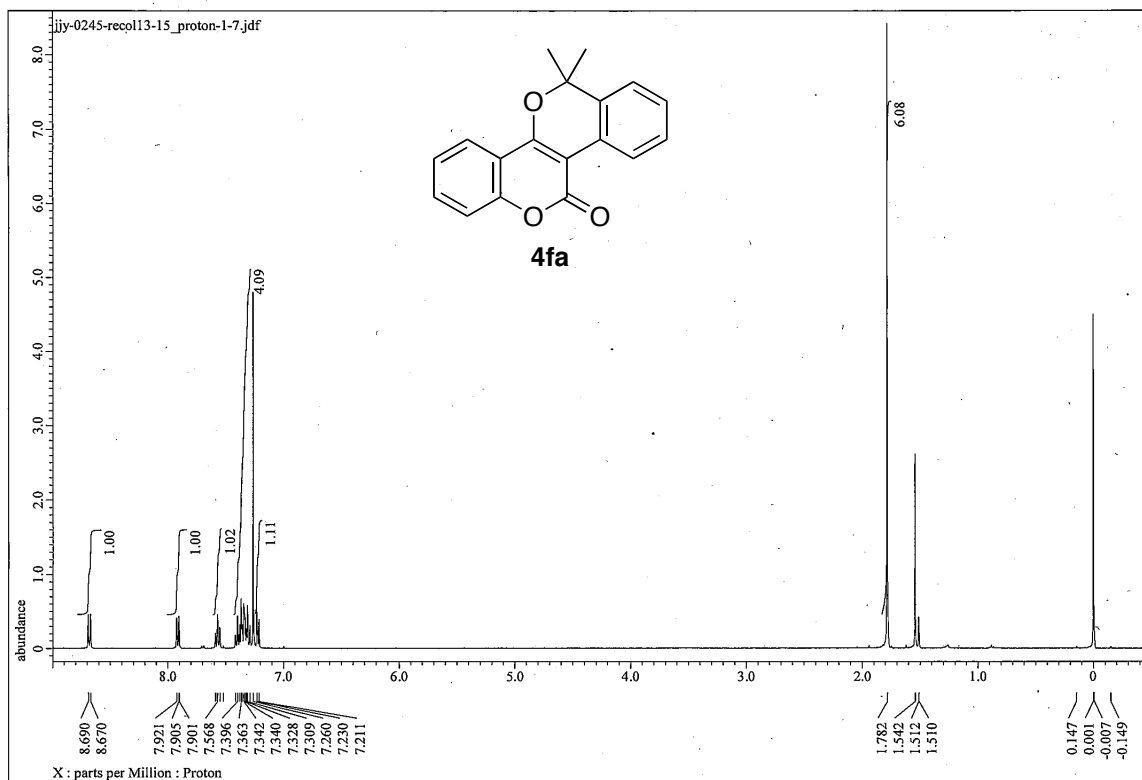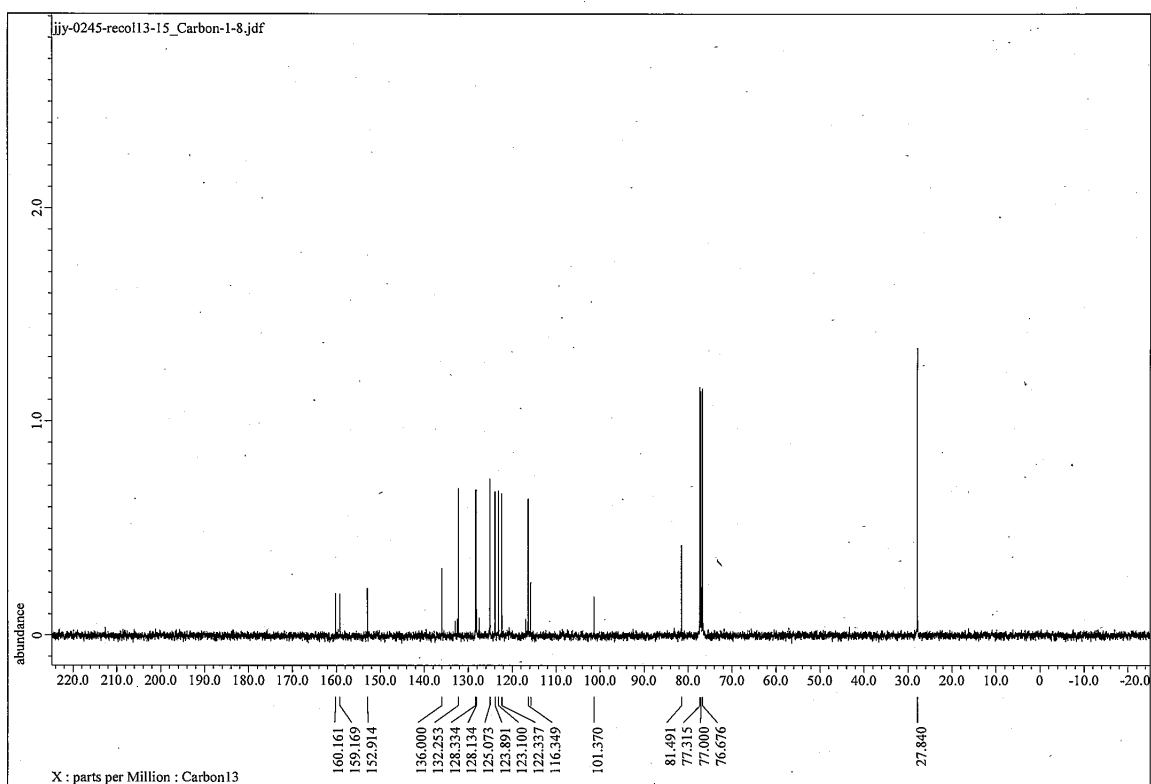

Supplement: SC-009-C7SC04265E-s001.pdf [file SC-009-C7SC04265E-s001.pdf]
